# Supplementary material for: Catalytic atroposelective electrophilic amination of diaryl anilines and diaryl phenols for the synthesis of axially chiral diaryl compounds
Source: Royal Society of Chemistry journal article supplement (doi:10.1039/d4qo01413h), 2024-01-01

## Supporting Information

### **Catalytic Atroposelective Electrophilic Amination of Diaryl Anilines and Diaryl Phenols for the Synthesis of Axially Chiral Diaryl Compounds**

Haihui Zhu,<sup>1</sup> Long Cheng,<sup>1</sup> Jie Wang,<sup>1</sup> Zhengyu Han,<sup>1,\*</sup> Jianwei Sun,<sup>2</sup> Hai  
Huang<sup>1,\*</sup>

<sup>1</sup> *Jiangsu Key Laboratory of Advanced Catalytic Materials & Technology, School of  
Petrochemical Engineering, Changzhou University, Changzhou 213164, P. R. China*

<sup>2</sup> *Department of Chemistry, The Hong Kong University of Science and Technology,  
Clear Water Bay, Kowloon, Hong Kong SAR 999077, P. R. China*

#### **Table of contents**

|                                                                           |     |
|---------------------------------------------------------------------------|-----|
| I. General Information.....                                               | S2  |
| II. Preparation of Substrates.....                                        | S3  |
| III. Synthesis of Axially Chiral Diaryl Anilines and Diaryl Phenols ..... | S22 |
| IV. Gram-scale Synthesis and Derivation of Product .....                  | S47 |
| V. Nonlinear Relationship Experiments.....                                | S50 |
| VI. Determination of Product Structure .....                              | S52 |

HPLC and NMR spectra

## I. General Information

Flash column chromatography was performed over silica gel (200-300 mesh) purchased from Qindao Puke Co. Lit., China. All air or moisture sensitive reactions were conducted in oven-dried glassware under nitrogen atmosphere using anhydrous solvents. Anhydrous toluene, acetonitrile, dichloromethane, chloroform, methanol, and tetrahydrofuran were purified by the Innovative® solvent purification system. Other anhydrous solvents were purchased from J&K Scientific.  $^1\text{H}$ ,  $^{13}\text{C}$ , and  $^{19}\text{F}$  NMR spectra were collected on a Bruker AV 400 or AV 300 MHz NMR spectrometer using residue solvent peaks as an internal standard ( $^1\text{H}$  NMR:  $\text{CDCl}_3$  at 7.26 ppm,  $\text{DMSO-}d_6$  at 2.50 ppm,  $\text{Acetone-}d_6$  at 2.05 ppm;  $^{13}\text{C}$  NMR:  $\text{CDCl}_3$  at 77.0 ppm,  $\text{DMSO-}d_6$  at 39.5 ppm,  $\text{Acetone-}d_6$  at 206.26 ppm). HRMS spectra were performed on a Waters mass spectrometer.

## II. Preparation of Substrates

The structures of substrates **1a-1k** were synthesized according to the following procedure, in which **1b**, **1d**, **1f**, **1g**, **1j**, **1k** are unknown compounds.

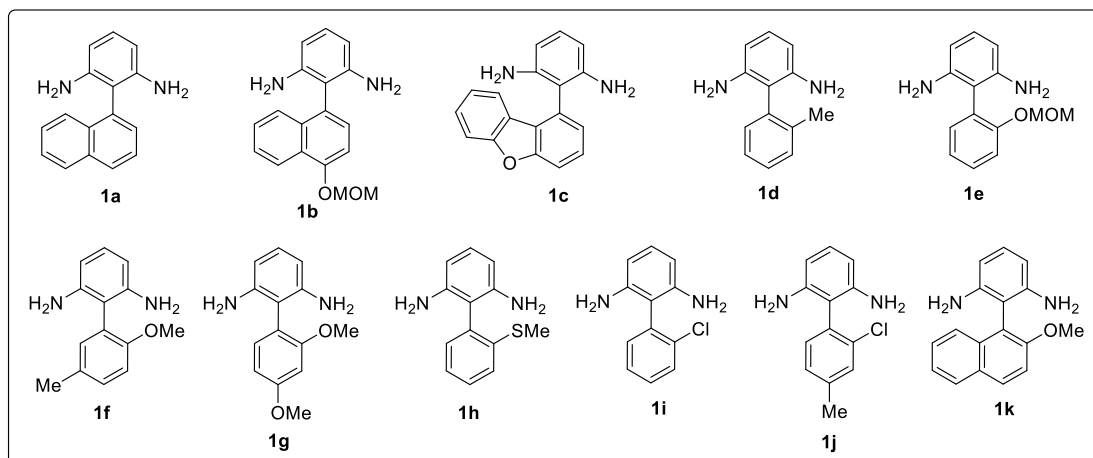

### General Procedure A: Preparation of the diaryl anilines **1**.<sup>[1]</sup>

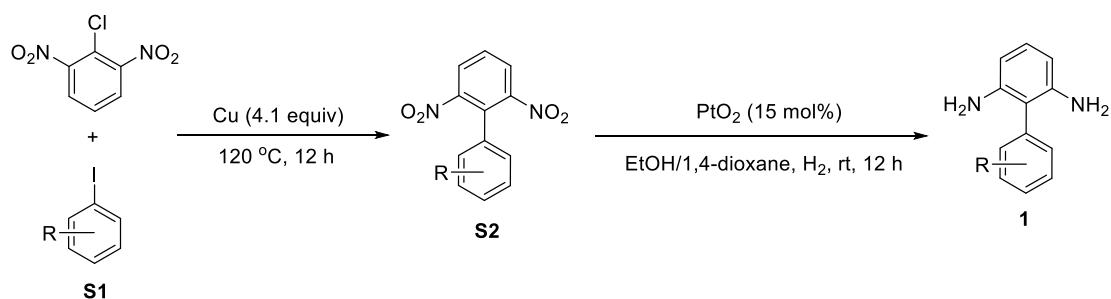

To a 50 mL round-bottomed flask equipped with a stir, **S1** (6.0 mmol, 1.2 equiv), 2-chloro-1,3-dinitrobenzene (1.19 g, 5.0 mmol, 1.0 equiv.) and Cu (1.30 g, 16.4 mmol, 4.1 equiv.) were added, and the mixture was stirred at 120 °C (oil bath) overnight. Then mixture was filtered over celite with DCM. The residue was purified by silica gel column chromatography to afford **S2**.

[1] Zhang, X. Y.; Zhu, D.; Huo, Y. X.; Chen, L. L.; Chen, Z. M. Atroposelective Sulfonylation of Biaryl Anilines Catalyzed by Chiral SPINOL-Derived Selenide. *Org. Lett.* **2023**, *25*, 3445-3450.

Under N<sub>2</sub> atmosphere at room temperature, to solution of **S2** (1.0 equiv) and PtO<sub>2</sub> (0.15 equiv) in 2:1 mixture of EtOH and 1,4-dioxane (15 mL). Then the reaction mixture was stirred at room temperature for 12 h. The catalyst was removed by filtration over Celite and the residue was purified by silica gel column chromatography to afford **1**.

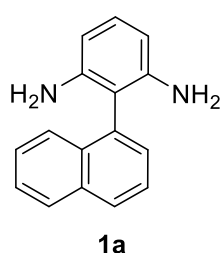

**2-(Naphthalen-1-yl)benzene-1,3-diamine (1a)** was prepared according to the General Procedure A as a brownish solid (chromatography eluent: petroleum ether/dichloromethane/acetone = 15:4:1) in 98% yield (196.2 mg).

<sup>1</sup>H NMR (400 MHz, CDCl<sub>3</sub>) δ 7.93 (m, 2H), 7.68 (d, *J* = 8.4 Hz, 1H), 7.60 (t, *J* = 7.0 Hz, 1H), 7.54-7.50 (m, 2H), 7.40-7.42 (m, 1H), 7.07 (t, *J* = 8.0 Hz, 1H), 6.31 (d, *J* = 8.0 Hz, 2H), 3.07 (brs, 4H) ppm.

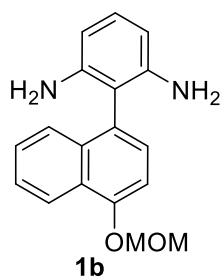

**2-(4-(Methoxymethoxy)naphthalen-1-yl)benzene-1,3-diamine (1b)** was prepared according to the General Procedure A as a brownish solid (chromatography eluent: petroleum ether/dichloromethane/acetone = 15:4:1) in



99% yield (201.2 mg).

$^1\text{H NMR}$  (400 MHz,  $\text{CDCl}_3$ )  $\delta$  8.37 (d,  $J = 8.2$  Hz, 1H), 7.63 (d,  $J = 8.3$  Hz, 1H), 7.55-7.51 (m, 1H), 7.48-7.44 (m, 1H), 7.41 (d,  $J = 7.8$  Hz, 1H), 7.21 (d,  $J = 7.8$  Hz, 1H), 7.06 (t,  $J = 7.9$  Hz, 1H), 6.29 (d,  $J = 8.0$  Hz, 2H), 5.46 (s, 2H), 3.60 (s, 3H), 3.34 (brs, 4H) ppm.

$^{13}\text{C NMR}$  (100 MHz,  $\text{CDCl}_3$ )  $\delta$  152.9, 145.7 (2C), 132.8, 129.0, 128.8, 127.0, 126.6, 125.8, 125.2, 122.3, 111.4, 108.4, 105.5, 94.5, 56.3 ppm.

**HRMS** (ES+) Calcd for  $\text{C}_{18}\text{H}_{19}\text{N}_2\text{O}_2$  [ $\text{M} + \text{H}$ ] $^+$ : 295.1447, Found: 295.1444.

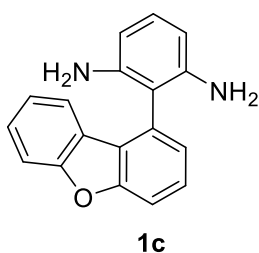

**2-(Dibenzo[*b,d*]furan-1-yl)benzene-1,3-diamine (1c)** was prepared according to the General Procedure A as a brownish solid (chromatography eluent: petroleum ether/dichloromethane/acetone = 15:4:1) in 92% yield (348.1 mg).

$^1\text{H NMR}$  (400 MHz,  $\text{CDCl}_3$ )  $\delta$  7.62-7.54 (m, 3H), 7.42-7.38 (m, 1H), 7.32-7.30 (m, 1H), 7.27-7.24 (m, 1H), 7.18-7.14 (m, 1H), 7.09 (t,  $J = 8.0$  Hz, 1H), 6.31 (d,  $J = 8.0$  Hz, 2H), 3.32 (brs, 4H) ppm.

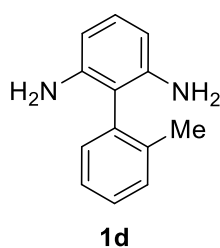

**2'-Methyl-[1,1'-biphenyl]-2,6-diamine (1d)** was prepared according to the General Procedure A as a brownish solid (chromatography eluent: petroleum ether/dichloromethane = 1:1) in 85% yield (593.3 mg).

$^1\text{H NMR}$  (400 MHz,  $\text{CDCl}_3$ )  $\delta$  7.36-7.20 (m, 4H), 6.97 (t,  $J$  = 7.9 Hz, 1H), 6.22 (d,  $J$  = 7.9 Hz, 2H), 3.25 (s, 4H), 2.16 (s, 3H) ppm.

$^{13}\text{C NMR}$  (100 MHz,  $\text{CDCl}_3$ )  $\delta$  144.5, 138.4, 134.5, 130.9, 130.7, 128.7, 128.2, 127.0, 113.2, 105.4, 19.1 ppm.

**HRMS** (ES<sup>+</sup>) Calcd for  $\text{C}_{13}\text{H}_{15}\text{N}_2$  [ $\text{M} + \text{H}$ ]<sup>+</sup>: 199.1235, Found: 199.1232.

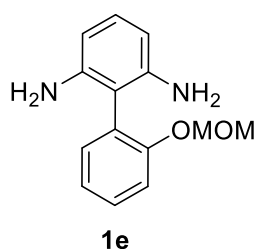

**2'-(Methoxymethoxy)-[1,1'-biphenyl]-2,6-diamine (1e)** was prepared according to the General Procedure A as a brownish solid (chromatography eluent: petroleum ether/ethyl acetate = 5:1) in 85% yield (995.5 mg).

$^1\text{H NMR}$  (400 MHz,  $\text{CDCl}_3$ )  $\delta$  7.34-7.30 (m, 1H), 7.23-7.19 (m, 2H), 7.10 (t,  $J$  = 7.4 Hz, 1H), 6.90 (t,  $J$  = 7.9 Hz, 1H), 6.14 (d,  $J$  = 7.9 Hz, 2H), 5.03 (s, 2H), 3.36 (s, 4H), 3.31 (s, 3H) ppm.

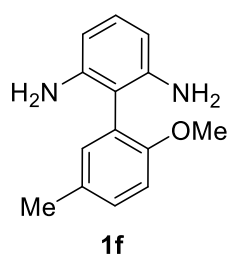

**2'-Methoxy-5'-methyl-[1,1'-biphenyl]-2,6-diamine (1f)** was prepared according to the General Procedure A as a brownish solid (chromatography eluent: petroleum ether/ethyl acetate = 3:1) in 95% yield (500.1 mg).

$^1\text{H NMR}$  (400 MHz,  $\text{CDCl}_3$ )  $\delta$  7.19-7.17 (m, 1H), 7.08 (d,  $J = 1.4$  Hz, 1H), 6.99-6.94 (m, 2H), 6.25 (d,  $J = 7.9$  Hz, 2H), 3.77 (s, 3H), 3.37 (brs, 4H), 2.30 (s, 3H) ppm.

$^{13}\text{C NMR}$  (100 MHz,  $\text{CDCl}_3$ )  $\delta$  155.3, 144.9, 132.8, 130.9, 129.9, 128.7, 123.3, 111.9, 110.9, 105.8, 55.9, 20.4 ppm.

**HRMS** (ES+) Calcd for  $\text{C}_{14}\text{H}_{17}\text{N}_2\text{O}$  [ $\text{M} + \text{H}$ ] $^+$ : 229.1341, Found: 229.1331.

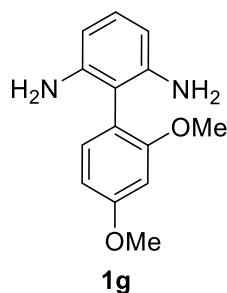

**2',4'-Dimethoxy-[1,1'-biphenyl]-2,6-diamine (1g)** was prepared according to the General Procedure A as a brownish solid (chromatography eluent: petroleum ether/ethyl acetate = 2:1) in 83% yield (530.2 mg).

$^1\text{H NMR}$  (400 MHz,  $\text{CDCl}_3$ )  $\delta$  7.18 (m, 1H), 6.96 (t,  $J = 7.9$  Hz, 1H), 6.65-6.62 (m, 2H), 6.23 (t,  $J = 7.9$  Hz, 2H), 3.87 (s, 3H), 3.77 (s, 3H), 3.40 (brs, 4H) ppm.

$^{13}\text{C NMR}$  (100 MHz,  $\text{CDCl}_3$ )  $\delta$  160.8, 158.5, 145.3, 132.7, 128.6, 115.7, 110.2, 105.6, 105.4, 99.4, 55.6, 55.3 ppm.

**HRMS** (ES+) Calcd for  $\text{C}_{14}\text{H}_{17}\text{N}_2\text{O}_2$  [ $\text{M} + \text{H}$ ] $^+$ : 245.1290, Found: 245.1285.

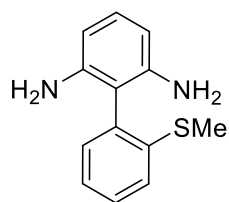

**1h**

**2'-(Methylthio)-[1,1'-biphenyl]-2,6-diamine (1h)** was prepared according to the General Procedure A as a brownish solid (chromatography eluent: petroleum ether/dichloromethane = 1:1) in 88% yield (627.4 mg).

$^1\text{H NMR}$  (400 MHz,  $\text{CDCl}_3$ )  $\delta$  7.41-7.38 (m, 1H), 7.30-7.22 (m, 3H), 7.02 (t,  $J = 7.9$  Hz, 1H), 6.26 (d,  $J = 8.0$  Hz, 2H), 3.26 (brs, 4H), 2.39 (s, 3H) ppm.

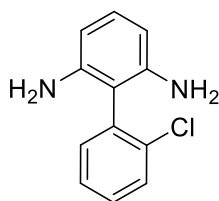

**1i**

**2'-Chloro-[1,1'-biphenyl]-2,6-diamine (1i)** was prepared according to the General Procedure A as a brownish solid (chromatography eluent: petroleum ether/ethyl acetate = 4:1) in 88% yield (156 mg).

$^1\text{H NMR}$  (400 MHz,  $\text{CDCl}_3$ )  $\delta$  7.59-7.57 (m, 1H), 7.43-7.34 (m, 3H), 7.02 (t,  $J = 8.0$  Hz, 1H), 6.29 (d,  $J = 7.9$  Hz, 2H), 3.36 (brs, 4H) ppm.

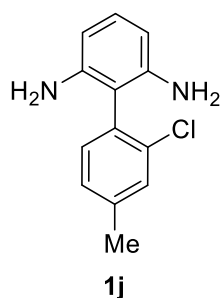

**2'-Chloro-4'-methyl-[1,1'-biphenyl]-2,6-diamine (1j)** was prepared according to the General Procedure A as a brownish solid (chromatography eluent: petroleum ether/ethyl acetate = 4:1) in 90% yield (501.1 mg).

$^1\text{H NMR}$  (400 MHz,  $\text{CDCl}_3$ )  $\delta$  7.39 (s, 1H), 7.25-7.18 (m, 2H), 6.99 (t,  $J = 7.9$  Hz, 1H), 6.24 (t,  $J = 7.9$  Hz, 2H), 3.31 (brs, 4H), 2.39 (s, 3H) ppm.

$^{13}\text{C NMR}$  (100 MHz,  $\text{CDCl}_3$ )  $\delta$  144.8, 139.9, 134.8, 132.4, 130.9, 130.8, 129.4, 129.0, 111.5, 105.6, 20.9 ppm.

**HRMS** (ES<sup>+</sup>) Calcd for  $\text{C}_{13}\text{H}_{14}\text{ClN}_2$  [ $\text{M} + \text{H}$ ]<sup>+</sup>: 233.0846, Found: 233.0843.

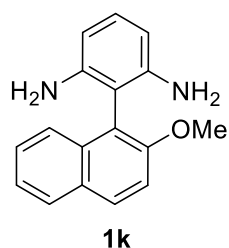

**2-(2-Methoxynaphthalen-1-yl)benzene-1,3-diamine (1k)** was prepared according to the General Procedure A as a brownish solid (chromatography eluent: petroleum ether/ethyl acetate/acetone = 15:4:1) in 81% yield (119.5 mg).

$^1\text{H NMR}$  (400 MHz,  $\text{CDCl}_3$ )  $\delta$  7.94 (d,  $J = 9.0$  Hz, 1H), 7.86-7.84 (m, 1H), 7.52-7.49 (m, 1H), 7.44-7.35 (m, 3H), 7.08 (t,  $J = 7.9$  Hz, 1H), 6.32 (d,  $J = 7.9$  Hz, 2H), 3.91 (s, 3H), 3.15 (brs, 4H) ppm.

$^{13}\text{C}$  NMR (100 MHz,  $\text{CDCl}_3$ )  $\delta$  155.3, 145.5, 133.0, 130.2, 129.6, 129.2, 128.1, 127.2, 124.4, 124.1, 116.9, 114.1, 107.8, 105.7, 56.8 ppm.

HRMS (ES+) Calcd for  $\text{C}_{17}\text{H}_{17}\text{N}_2\text{O}$   $[\text{M} + \text{H}]^+$ : 265.1341, Found: 265.1332.

The structures of substrates **4a-4k** were synthesized according to the following procedure and they are all known compounds.

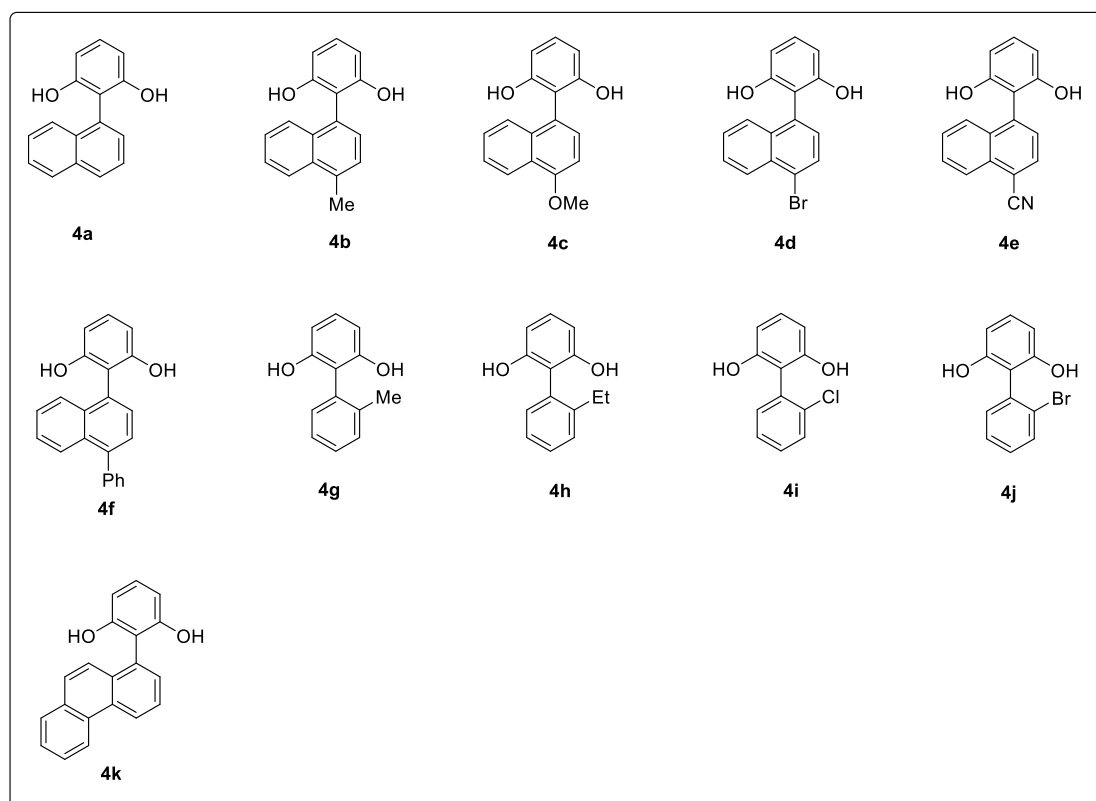

### General Procedure B: Preparation of the diaryl phenols **4a**<sup>[2]</sup>.

[2] (a) Munday, E. S.; Grove, M. A.; Feoktistova, T.; Brueckner, A. C.; Walden, D. M.; Young, C. M.; Smith, A. D. Isothiourea-Catalyzed Atropselective Acylation of Biaryl Phenols via Sequential Desymmetrization/Kinetic Resolution. *Angew. Chem. Int. Ed.* **2020**, *59*, 7897-7905. (b) Luo, H. Y.; Li, Z. H.; Zhu, D.; Yang, Q.; Cao, R. F.; Ding, T. M.; Chen, Z. M. Chiral Selenide/Achiral Sulfonic Acid Cocatalyzed Atropselective Sulfonylation of Biaryl Phenols *via* a Desymmetrization/Kinetic Resolution Sequence. *J. Am. Chem. Soc.* **2022**, *144*, 2943-2952.

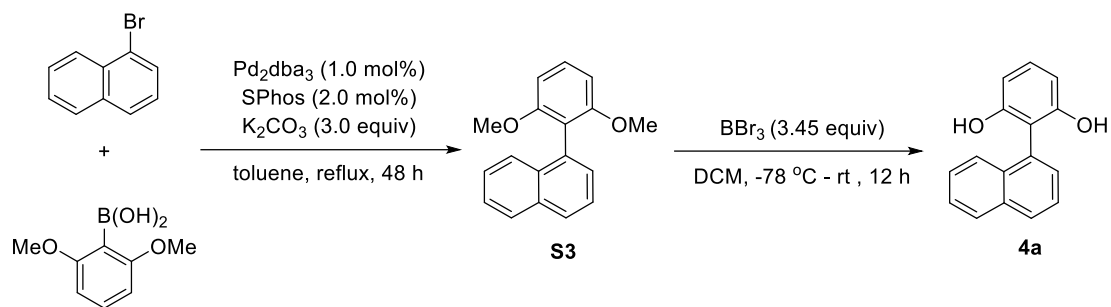

Under  $\text{N}_2$  atmosphere at room temperature, to solution of 2,6-dimethoxyphenylboronic acid (1.85 g, 12.0 mmol, 2.0 equiv), 1-bromonaphthalene (1.24 g, 6.0 mmol, 1.0 equiv) and  $\text{K}_2\text{CO}_3$  (2.49 g, 18.0 mmol, 3.0 equiv) in degassed toluene (100 mL) was added  $\text{Pd}_2(\text{dba})_3$  (54.9 mg, 1.0 mol%), and SPhos (49.3 mg, 2.0 mol%). The reaction mixture was stirred at reflux for 48 h, then the reaction mixture was filtered through celite, diluted with EA (100 mL) and washed with brine. The combined organic layers dried over anhydrous  $\text{Na}_2\text{SO}_4$ , and concentrated under reduced pressure. The residue was purified by silica gel column chromatography (petroleum ether/ethyl acetate = 100:1) to afford **S3**.

To solution of **S3** (897.6 mg, 3.4 mmol, 1.0 equiv) in DCM (20 mL) was added dropwise Boron tribromide (3.45 equiv, 1.0 M in DCM, 11.7 mL) at  $-78\text{ }^\circ\text{C}$ . Then the reaction mixture was stirred at room temperature for 12 h. The reaction mixture was quenched with  $\text{H}_2\text{O}$  (20 mL) and extracted with EA (30 mL  $\times$  3). The combined organic layers were washed with water, brine, dried over anhydrous  $\text{Na}_2\text{SO}_4$ , and concentrated under reduced pressure. The residue was purified by silica gel column chromatography (petroleum ether/ethyl acetate = 10:1) to afford **4a**.

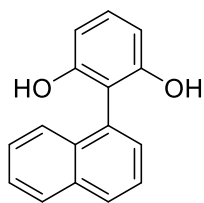

**4a**

**2-(Naphthalen-1-yl)benzene-1,3-diol (4a)** was prepared according to the General Procedure B as a white solid (chromatography eluent: petroleum ether/ethyl acetate = 10:1) in 91% yield (720.1 mg).

$^1\text{H NMR}$  (400 MHz,  $\text{CDCl}_3$ )  $\delta$  7.91 (t,  $J = 8.5$  Hz, 2H), 7.60-7.43 (m, 5H), 7.24-7.20 (m, 1H), 6.62 (d,  $J = 8.2$  Hz, 2H), 4.72 (s, 2H) ppm.

### General Procedure C: Preparation of the diaryl phenols **4b**, **4d-f**, **4k**

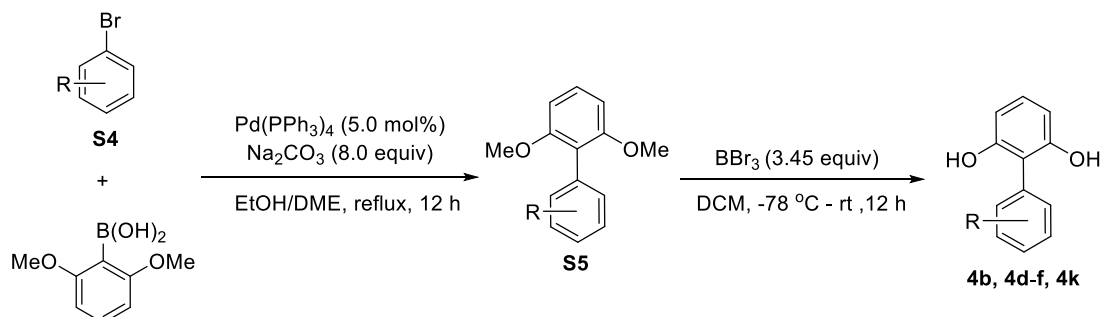

Under  $\text{N}_2$  atmosphere at room temperature, to solution of 2,6-dimethoxyphenyl)boronic acid (1.85 g, 12.0 mmol, 2.0 equiv), aryl bromides **S4** (6.0 mmol, 1.0 equiv) and  $\text{Na}_2\text{CO}_3$  (5.1 g, 48.0 mmol, 8.0 equiv) in EtOH/DME (35 mL,  $v/v = 4/3$ ) was added  $\text{Pd}(\text{PPh}_3)_4$  (346.7 mg, 5.0 mol%). The reaction mixture was stirred at reflux for 12 hours, then the reaction mixture was filtered through celite, diluted with EA (50 mL) and washed with brine. The combined organic layers dried over anhydrous  $\text{Na}_2\text{SO}_4$ , and concentrated under reduced pressure. The residue was purified by silica gel column chromatography



(petroleum ether/ethyl acetate = 100:1) to afford **S5**.

To solution of **S5** (1.0 equiv) in DCM (20 mL) was added dropwise Boron tribromide (3.45 equiv, 1.0 M in DCM) at -78 °C. Then the reaction mixture was stirred at room temperature for 12 h. The reaction mixture was quenched with H<sub>2</sub>O (20 mL) and extracted with EA (30 mL × 3). The combined organic layers were washed with water, brine, dried over anhydrous Na<sub>2</sub>SO<sub>4</sub>, and concentrated under reduced pressure. The residue was purified by silica gel column chromatography (petroleum ether/ethyl acetate = 25:1) to afford **4b**, **4d-f** and **4k**.

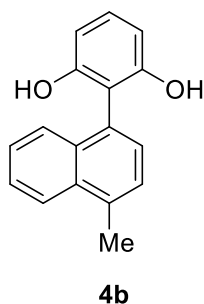

**2-(4-Methylnaphthalen-1-yl)benzene-1,3-diol (4b)** was prepared according to the General Procedure C as a white solid (chromatography eluent: petroleum ether/ethyl acetate = 20:1) in 72% yield (580.3 mg).

<sup>1</sup>H NMR (300 MHz, CDCl<sub>3</sub>) δ 8.11 (d, *J* = 8.4 Hz, 1H), 7.65-7.58 (m, 2H), 7.52-7.44 (m, 3H), 7.26 (t, *J* = 7.4 Hz, 1H), 6.66 (d, *J* = 8.2 Hz, 2H), 2.79 (s, 3H) ppm.

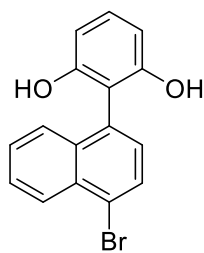

**4d**

**2-(4-Bromonaphthalen-1-yl)benzene-1,3-diol (4d)** was prepared according to the General Procedure C as a white solid (chromatography eluent: petroleum ether/ethyl acetate = 20:1) in 52% yield (288.1 mg).

$^1\text{H NMR}$  (400 MHz,  $\text{CDCl}_3$ )  $\delta$  8.37 (d,  $J = 8.4$  Hz, 1H), 7.94 (d,  $J = 7.6$  Hz, 1H), 7.70-7.62 (m, 2H), 7.56-7.52 (m, 1H), 7.40 (d,  $J = 7.5$  Hz, 1H), 7.28-7.24 (m, 1H), 6.65 (d,  $J = 8.2$  Hz, 2H), 4.61 (s, 2H) ppm.

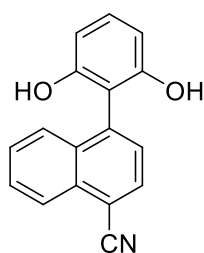

**4e**

**4-(2,6-Dihydroxyphenyl)-1-naphthonitrile (4e)** was prepared according to the General Procedure C as a white solid (chromatography eluent: petroleum ether/ethyl acetate = 20:1) in 42% yield (121.5 mg).

$^1\text{H NMR}$  (400 MHz,  $\text{CH}_3\text{OD}$ )  $\delta$  8.10 (d,  $J = 8.3$  Hz, 1H), 7.92 (d,  $J = 7.4$  Hz, 1H), 7.61-7.57 (m, 2H), 7.44-7.37 (m, 2H), 7.01 (t,  $J = 8.2$  Hz, 1H), 6.38 (d,  $J = 8.2$  Hz, 2H) ppm.

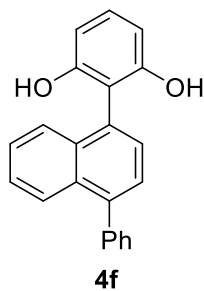

**2-(4-Phenylnaphthalen-1-yl)benzene-1,3-diol (4f)** was prepared according to the General Procedure C as a white solid (chromatography eluent: petroleum ether/ethyl acetate = 10:1) in 85% yield (721.3 mg).

$^1\text{H NMR}$  (300 MHz,  $\text{CHCl}_3$ )  $\delta$  8.00-7.97 (m, 1H), 7.70-7.65 (m, 1H), 7.58-7.44 (m, 9H), 7.28-7.22 (m, 1H), 6.66 (d,  $J$  = 10.9 Hz, 2H), 4.87 (s, 2H) ppm.

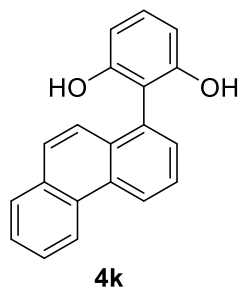

**2-(Phenanthren-1-yl)benzene-1,3-diol (4k)** was prepared according to the General Procedure C as a white solid (chromatography eluent: petroleum ether/ethyl acetate = 20:1) in 84% yield (276.8 mg).

$^1\text{H NMR}$  (400 MHz,  $\text{CHCl}_3$ )  $\delta$  8.81-8.75 (m, 1H), 7.93-7.86 (m, 2H), 7.78-7.65 (m, 4H), 7.60-7.56 (m, 1H), 6.69 (d,  $J$  = 8.2 Hz, 2H), 4.80 (s, 2H) ppm.

#### General Procedure D: Preparation of the diaryl phenols 4c

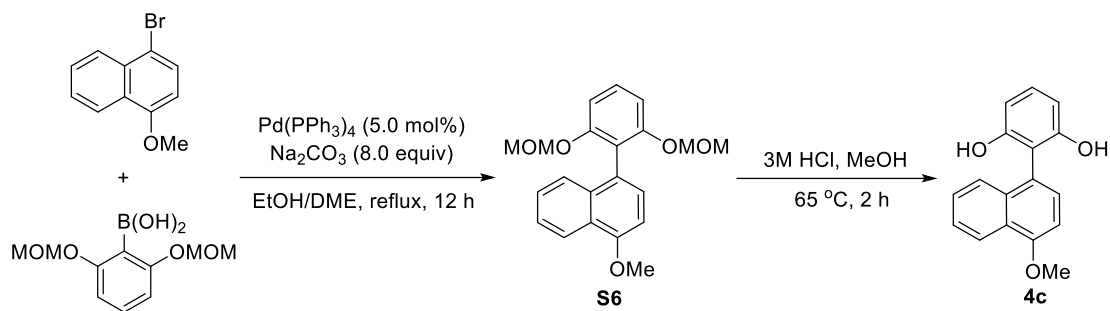

Under  $\text{N}_2$  atmosphere at room temperature, to solution of (2,6-bis(methoxymethoxy)phenyl)boronic acid (2.91 g, 12.0 mmol, 2.0 equiv), 1-bromo-4-methoxynaphthalene (1.42 g, 6.0 mmol, 1.0 equiv) and  $\text{Na}_2\text{CO}_3$  (5.09 g, 48.0 mmol, 8.0 equiv) in EtOH/DME (35 mL,  $v/v = 4/3$ ) was added  $\text{Pd}(\text{PPh}_3)_4$  (346.7 mg, 5.0 mol%). The reaction mixture was stirred at reflux for 12 h, then the reaction mixture was filtered through celite, diluted with EA (50 mL) and washed with brine. The combined organic layers dried over anhydrous  $\text{Na}_2\text{SO}_4$ , and concentrated under reduced pressure. The residue was purified by silica gel column chromatography (petroleum ether/ethyl acetate = 100:1) to afford **S6**.

To solution of **S6** (1.27 g, 3.6 mmol) in MeOH (20 mL) was added dropwise 3M HCl (1.0 mL) at room temperature. Then the reaction mixture was stirred at 65 °C for 2 h. The reaction mixture was quenched with  $\text{NaHCO}_3$  solution (20 mL) and extracted with EA (30 mL  $\times$  3). The combined organic layers were washed with water, brine, dried over anhydrous  $\text{Na}_2\text{SO}_4$ , and concentrated under reduced pressure. The residue was purified by silica gel column chromatography (petroleum ether/ethyl acetate = 20:1) to afford **4c**.

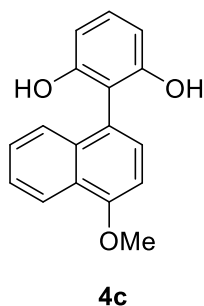

**2-(4-Methoxynaphthalen-1-yl)benzene-1,3-diol (4c)** was prepared according to the General Procedure D as a white solid (chromatography eluent: petroleum ether/ethyl acetate = 20:1) in 92% yield (880.3 mg).

$^1\text{H NMR}$  (400 MHz,  $\text{CDCl}_3$ )  $\delta$  8.36-8.34 (m, 1H), 7.56-7.45 (m, 4H), 7.26-7.22 (m, 1H), 6.94 (d,  $J = 7.8$  Hz, 1H), 6.65 (d,  $J = 8.2$  Hz, 2H), 4.79 (s, 2H), 4.06 (s, 3H) ppm.

#### General Procedure E: Preparation of the diaryl phenols **4g** and **4j**

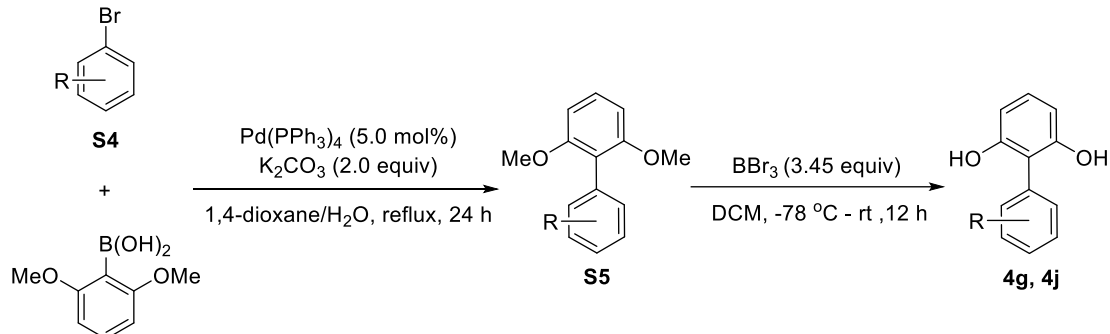

Under  $\text{N}_2$  atmosphere at room temperature, to solution of 2,6-dimethoxyphenylboronic acid (1.85 g, 12.0 mmol, 2.0 equiv), aryl bromides **S4** (6.0 mmol, 1.0 equiv) and  $\text{K}_2\text{CO}_3$  (1.66 g, 12.0 mmol, 2.0 equiv) in 1,4-dioxane/ $\text{H}_2\text{O}$  (45 mL,  $v/v = 8/1$ ) was added  $\text{Pd}(\text{PPh}_3)_4$  (346.7 mg, 5.0 mol%). The reaction mixture was stirred at reflux for 24 h, then the reaction mixture was filtered through celite, diluted with EA (50 mL) and washed with brine. The combined organic layers dried over anhydrous  $\text{Na}_2\text{SO}_4$ , and concentrated

under reduced pressure. The residue was purified by silica gel column chromatography (petroleum ether/ethyl acetate = 100:1) to afford **S5**.

To solution of **S5** (1.0 equiv) in DCM (20 mL) was added dropwise Boron tribromide (3.45 equiv, 1.0 M in DCM) at -78 °C. Then the reaction mixture was stirred at room temperature for 12 h. The reaction mixture was quenched with H<sub>2</sub>O (20 mL) and extracted with EA (30 mL × 3). The combined organic layers were washed with water, brine, dried over anhydrous Na<sub>2</sub>SO<sub>4</sub>, and concentrated under reduced pressure. The residue was purified by silica gel column chromatography (petroleum ether/ethyl acetate = 10:1) to afford **4g** and **4j**.

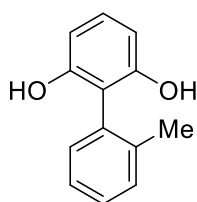

**4g**

**2'-Methyl-[1,1'-biphenyl]-2,6-diol (4g)** was prepared according to the General Procedure E as a white solid (chromatography eluent: petroleum ether/ethyl acetate = 20:1) in 66% yield (239.5 mg).

<sup>1</sup>H NMR (400 MHz, CHCl<sub>3</sub>) δ 7.43-7.34 (m, 3H), 7.29-7.26 (m, 1H), 7.17 (t, *J* = 8.2 Hz, 1H), 6.59 (d, *J* = 8.2 Hz, 2H), 4.62 (s, 2H), 2.16 (s, 3H) ppm.

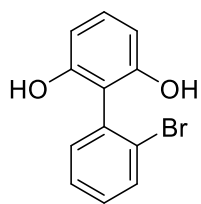

**4j**

**2'-Bromo-[1,1'-biphenyl]-2,6-diol (4j)** was prepared according to the General Procedure E as a white solid (chromatography eluent: petroleum ether/ethyl acetate = 20:1) in 42% yield (274.2 mg).

$^1\text{H NMR}$  (300 MHz,  $\text{CHCl}_3$ )  $\delta$  7.80 (d,  $J = 10.8$  Hz, 1H), 7.51-7.46 (m, 1H), 7.39-7.33 (m, 2H), 7.26-7.17 (m, 1H), 6.59 (d,  $J = 10.9$  Hz, 2H), 4.62 (s, 2H) ppm.

### General Procedure F: Preparation of the diaryl phenols **4h-i**

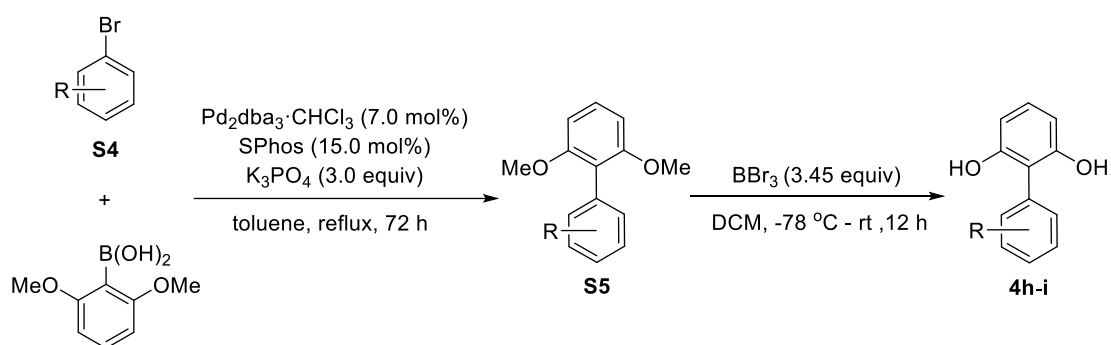

Under  $\text{N}_2$  atmosphere at room temperature, to solution of 2,6-dimethoxyphenyl)boronic acid (1.85 g, 12.0 mmol, 2.0 equiv), **S4** (6.0 mmol, 1.0 equiv) and  $\text{K}_3\text{PO}_4$  (3.82 g, 18.0 mmol, 3.0 equiv) in anhydrous toluene (85 mL) was added  $\text{Pd}_2\text{dba}_3\cdot\text{CHCl}_3$  (429.7 mg, 7.0 mol%) and SPhos (369.5 mg, 15.0 mol%). The reaction mixture was stirred at reflux for 72 h, then the reaction mixture was filtered through celite, diluted with EA (50 mL) then washed with brine. The combined organic layers dried over anhydrous  $\text{Na}_2\text{SO}_4$ , and

concentrated under reduced pressure. The residue was purified by silica gel column chromatography (petroleum ether/ethyl acetate = 100:1) to afford **S4**.

To solution of **S4** (1.0 equiv) in DCM (20 mL) was added dropwise Boron tribromide (3.45 equiv, 1.0 M in DCM) at -78 °C. Then the reaction mixture was stirred at room temperature for 12 h. The reaction mixture was quenched with H<sub>2</sub>O (20 mL) and extracted with EA (30 mL × 3). The combined organic layers were washed with water, brine, dried over anhydrous Na<sub>2</sub>SO<sub>4</sub>, and concentrated under reduced pressure. The residue was purified by silica gel column chromatography (petroleum ether/ethyl acetate = 10:1) to afford **4h-i**.

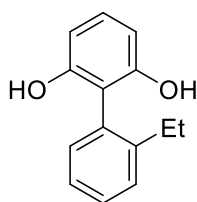

**4h**

**2'-Ethyl-[1,1'-biphenyl]-2,6-diol (4h)** was prepared according to the General Procedure F as a white solid (chromatography eluent: petroleum ether/ethyl acetate = 20:1) in 83% yield (454.5 mg).

<sup>1</sup>H NMR (400 MHz, CHCl<sub>3</sub>) δ 7.45-7.40 (m, 2H), 7.37-7.33 (m, 1H), 7.25-7.23 (m, 1H), 7.17 (t, *J* = 8.2 Hz, 1H), 6.58 (d, *J* = 8.2 Hz, 2H), 4.62 (s, 2H), 2.46 (7.17 (q, *J* = 7.6 Hz, 2H), 1.07 (t, *J* = 7.6 Hz, 3H) ppm.



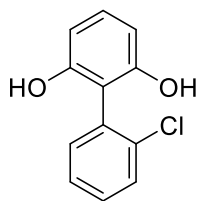

**4i**

**2'-Chloro-[1,1'-biphenyl]-2,6-diol (4i)** was prepared according to the General Procedure F as a yellow solid (chromatography eluent: petroleum ether/ethyl acetate = 20:1) in 82% yield (523.5 mg).

$^1\text{H NMR}$  (400 MHz,  $\text{CHCl}_3$ )  $\delta$  7.62-7.58 (m, 1H), 7.45-7.37 (m, 3H), 7.19 (t,  $J = 8.2$  Hz, 1H), 6.59 (d,  $J = 8.2$  Hz, 2H), 4.79 (s, 2H) ppm.

### III. Synthesis of Axially Chiral Diaryl Anilines and Diaryl Phenols

#### General Procedure G: The Synthesis of Axially Chiral diaryl Anilines **3** and Diaryl Phenols **5**

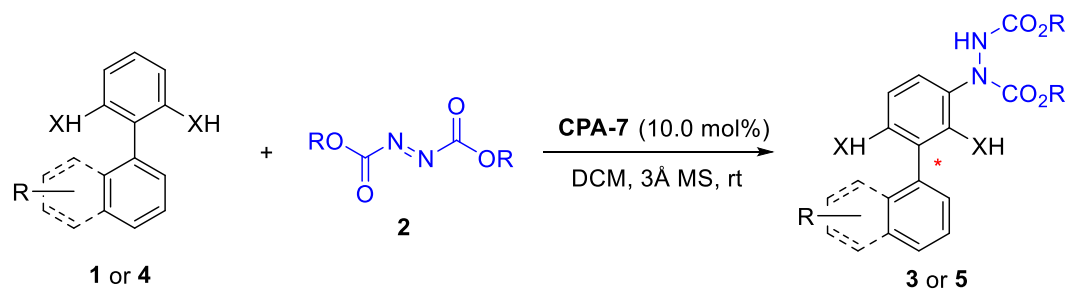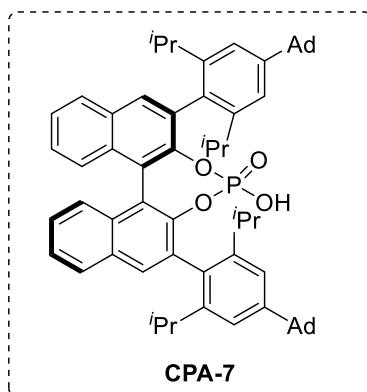

To a solution of **1** or **4** (0.2 mmol, 1.0 equiv), **2** (0.24 mmol, 1.2 equiv) and 3 Å MS (60.0 mg) in anhydrous DCM (4.0 mL) was added CPA-7 (18.7 mg, 10.0 mol%). Then the reaction mixture was stirred at room temperature for 3h. The reaction mixture was directly concentrated and purified by silica gel column chromatography (petroleum ether/ethyl acetate = 8:1 to 2:1) to afford the desired products **3** or **5**.

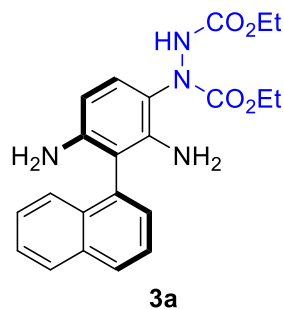

**(R)-Diethyl 1-(2,4-diamino-3-(naphthalen-1-yl)phenyl)hydrazine-1,2-dicarboxylate (3a)** was prepared according to the General Procedure G as yellow solid (chromatography eluent: petroleum ether/ethyl acetate = 8:1 to 2:1) in 95% yield (77.5 mg, 88% ee).

$[\alpha]_{\text{D}}^{25}$ : -65.30 ( $c = 0.22$ ,  $\text{CHCl}_3$ ). HPLC (OD,  $i$ -PrOH/ $n$ -hexane = 20/80, flow rate = 1.0 mL/min,  $\lambda = 210$  nm)  $t_{\text{R}} = 17.4$  min (minor), 21.9 min (major).

$^1\text{H NMR}$  (400 MHz,  $\text{CDCl}_3$ )  $\delta$  7.91 (d,  $J = 8.1$  Hz, 2H), 7.66 (d,  $J = 8.0$  Hz, 1H), 7.58 (t,  $J = 7.2$  Hz, 1H), 7.55-7.49 (m, 2H), 7.44-7.40 (m, 1H), 7.00 (s, 1H), 6.18 (d,  $J = 8.4$  Hz, 1H), 4.24-4.16 (m, 4H), 1.28-1.23 (m, 6H) ppm.

$^{13}\text{C NMR}$  (100 MHz,  $\text{CDCl}_3$ )  $\delta$  157.5, 156.7, 145.4, 143.6, 134.3, 134.0, 132.8, 132.4, 131.7, 128.6, 128.4, 126.6, 126.4, 126.3, 125.3, 118.4, 111.1, 104.2, 63.0, 62.2, 14.4, 14.3 ppm.

**HRMS** (ES+) Calcd for  $\text{C}_{22}\text{H}_{25}\text{N}_4\text{O}_4$   $[\text{M} + \text{H}]^+$ : 409.1876, Found: 409.1867.

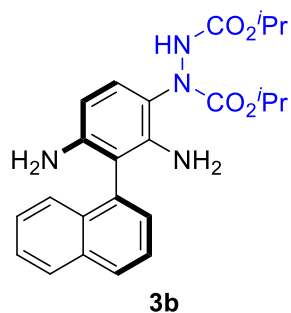

(*R*)-Diisopropyl 1-(2,4-diamino-3-(naphthalen-1-yl)phenyl)hydrazine-1,2-dicarboxylate (**3b**) was prepared according to the General Procedure G as yellow solid (chromatography eluent: petroleum ether/ethyl acetate = 8:1 to 2:1) in 96% yield (83.8 mg, 90% ee).

$[\alpha]_{\text{D}}^{25}$ : -54.30 ( $c = 0.23$ ,  $\text{CHCl}_3$ ). HPLC (IC,  $i$ -PrOH/ $n$ -hexane = 20/80, flow rate = 1.0 mL/min,  $\lambda = 210$  nm)  $t_{\text{R}} = 16.5$  min (minor), 20.0 min (major).

$^1\text{H NMR}$  (400 MHz,  $\text{CDCl}_3$ )  $\delta$  7.90 (d,  $J = 8.1$  Hz, 2H), 7.66 (s, 1H), 7.58 (t,  $J = 7.3$  Hz, 1H), 7.52-7.49 (m, 2H), 7.43-7.39 (m, 1H), 7.06-6.97 (m, 2H), 6.17 (d,  $J = 8.3$  Hz, 1H), 4.96-4.95 (m, 2H), 1.26-1.25 (m, 12H) ppm.

$^{13}\text{C NMR}$  (100 MHz,  $\text{CDCl}_3$ )  $\delta$  157.2, 155.9, 145.3, 143.6, 134.3, 134.0, 132.8, 132.6, 131.7, 131.1, 128.6, 128.3, 126.3 (2C), 125.3, 118.6, 110.9, 104.1, 70.6, 70.0, 21.9 ppm.

HRMS (ES+) Calcd for  $\text{C}_{24}\text{H}_{29}\text{N}_4\text{O}_4$   $[\text{M} + \text{H}]^+$ : 437.2189, Found: 437.2186.

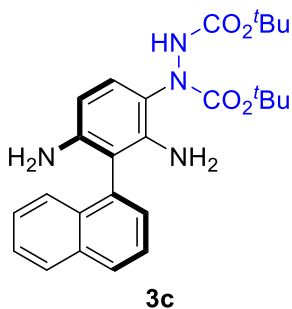

**(R)-Di-tert-butyl 1-(2,4-diamino-3-(naphthalen-1-yl)phenyl)hydrazine-1,2-dicarboxylate (3c)** was prepared according to the General Procedure G as yellow solid (chromatography eluent: petroleum ether/ethyl acetate = 10:1 to 2:1) in 94% yield (87.3 mg, 93% ee).

$[\alpha]_{\text{D}}^{25}$ : -57.20 ( $c = 0.25$ ,  $\text{CHCl}_3$ ). HPLC (IC,  $i\text{-PrOH}/n\text{-hexane} = 5/95$ , flow rate = 1.0 mL/min,  $\lambda = 210$  nm)  $t_{\text{R}} = 35.7$  min (minor), 43.8 min (major).

$^1\text{H NMR}$  (400 MHz,  $\text{CDCl}_3$ , **298K**)  $\delta$  7.91 (d,  $J = 7.9$  Hz, 2H), 7.69-7.56 (m, 2H), 7.55-7.49 (m, 2H), 7.41 (s, 1H), 7.02-6.88 (m, 2H), 6.18 (d,  $J = 8.2$  Hz, 1H), 1.46 (s, 18H) ppm.

$^{13}\text{C NMR}$  (100 MHz,  $\text{CDCl}_3$ , **298K**)  $\delta$  156.5, 155.1, 145.0, 143.6, 134.3, 132.8, 131.8, 128.8, 128.5, 128.3, 127.9, 127.7, 126.3 (2C), 125.4, 119.5, 110.9, 104.1, 81.5 (2C), 28.2, 28.1 ppm.

**HRMS** (ES+) Calcd for  $\text{C}_{26}\text{H}_{33}\text{N}_4\text{O}_4$   $[\text{M} + \text{H}]^+$ : 465.2502, Found: 465.2495

Due to the presence of rotamers of the amide groups, the  $^1\text{H NMR}$  and  $^{13}\text{C NMR}$  spectra of the products exhibited a relatively complex pattern at room temperature. To confirm the purity of the product, high-temperature experiment was conducted on the typical product **3c** at 100 °C. The result indicated that the  $^1\text{H NMR}$  and  $^{13}\text{C NMR}$  spectrum appeared cleaner at high temperature, suggesting the elimination of rotamers and the presence of a highly pure product.

$^1\text{H NMR}$  (400 MHz,  $\text{DMSO-}d_6$ , **364.1K**)  $\delta$  9.02 (br, 1H), 7.97 (s, 2H), 7.63 (s, 1H), 7.54 (s, 1H), 7.40 (d,  $J = 5.6$  Hz, 1H), 6.98 (d,  $J = 7.6$  Hz, 2H), 6.14 (d,  $J = 8.0$  Hz,

2H), 1.44 (s, 9H), 1.42 (s, 9H) ppm.

$^{13}\text{C}$  NMR (100 MHz, DMSO- $d_6$ , 373.2K)  $\delta$  155.3, 153.8, 145.0, 142.3, 133.7, 132.9, 131.2, 128.1, 127.7 (2C), 127.4, 125.8, 125.5, 125.4, 124.7, 118.4, 109.2, 103.1, 79.3, 79.3, 27.6, 27.4 ppm.

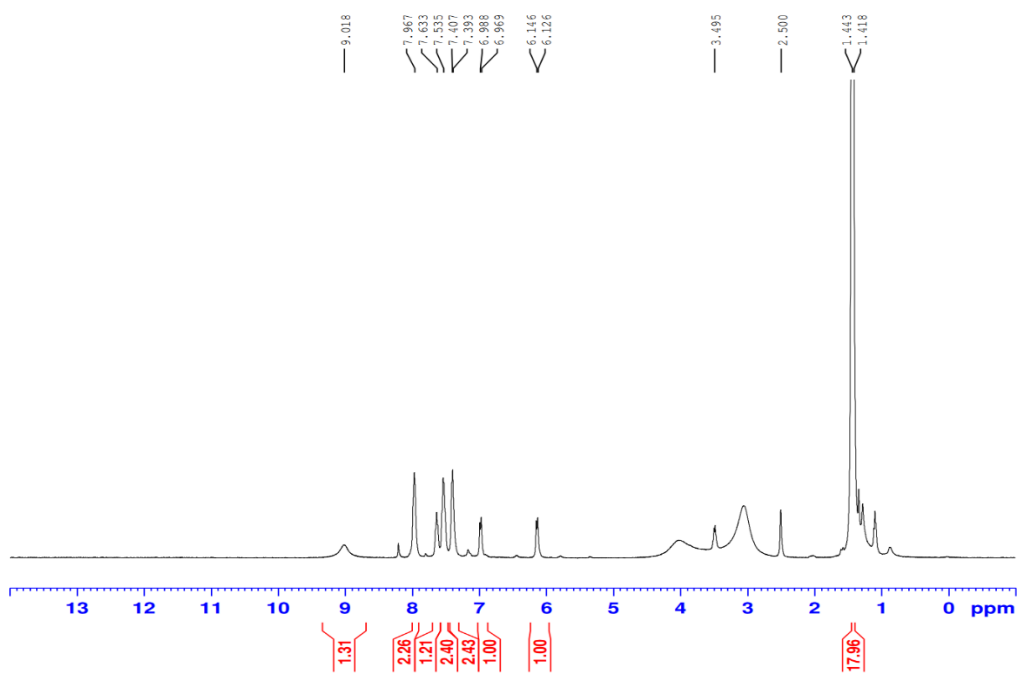

Figure S1.  $^1\text{H}$  NMR spectrum of **3c** at 364.1 K

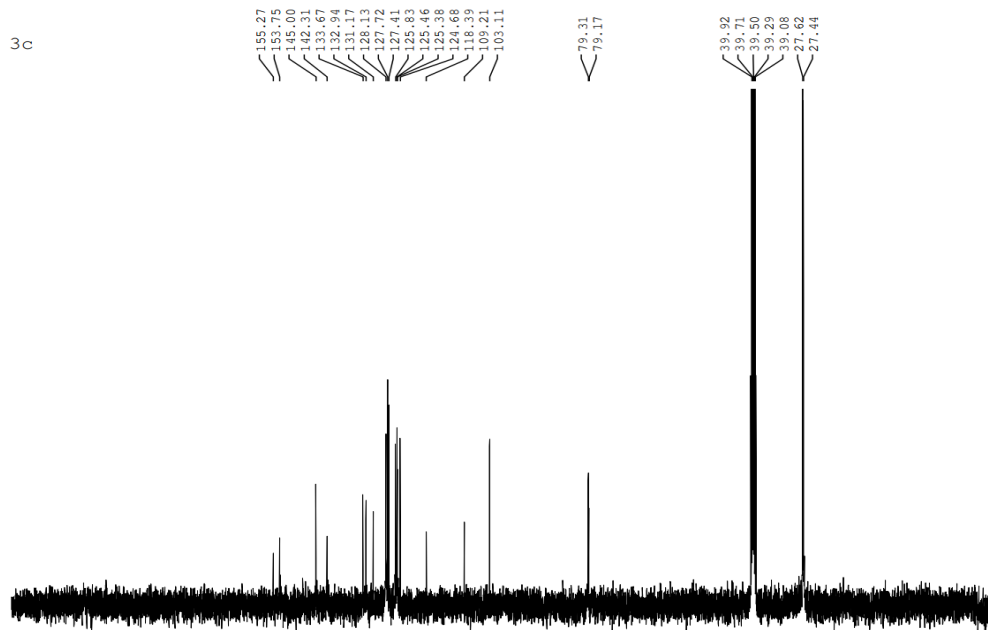

Figure S2.  $^{13}\text{C}$  NMR spectrum of **3c** at 373.2 K

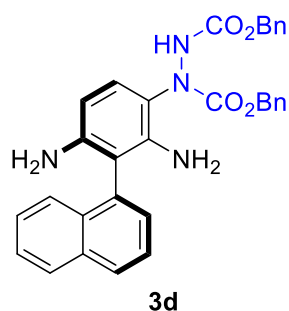

**(R)-Dibenzyl 1-(2,4-diamino-3-(naphthalen-1-yl)phenyl)hydrazine-1,2-dicarboxylate (3d)** was prepared according to the General Procedure G as yellow solid (chromatography eluent: petroleum ether/ethyl acetate = 8:1 to 3:1) in 75% yield (79.8 mg, 70% ee).

$[\alpha]_{\text{D}}^{25}$ : -43.40 ( $c = 0.20$ ,  $\text{CHCl}_3$ ). HPLC (IC,  $i\text{-PrOH}/n\text{-hexane} = 20/80$ , flow rate = 1.0 mL/min,  $\lambda = 210$  nm)  $t_{\text{R}} = 46.3$  min (minor), 64.8 min (major).

$^1\text{H NMR}$  (400 MHz,  $\text{CDCl}_3$ )  $\delta$  7.93 (d,  $J = 8.2$  Hz, 2H), 7.67-7.48 (m, 5H), 7.43-7.26 (m, 11H), 7.02-7.00 (m, 1H), 6.16 (d,  $J = 8.4$  Hz, 1H), 5.25-5.08 (m, 4H) ppm.

$^{13}\text{C NMR}$  (100 MHz,  $\text{CDCl}_3$ )  $\delta$  157.2, 156.4, 145.6, 143.5, 135.9, 135.3, 134.3, 132.4, 131.7, 128.6 (2C), 128.4 (2C), 128.3 (2C), 128.2 (2C), 128.1 (2C), 127.7, 127.0, 126.3, 125.2, 118.2, 111.0, 104.3, 68.2, 67.8 ppm.

**HRMS** (ES<sup>+</sup>) Calcd for  $\text{C}_{32}\text{H}_{29}\text{N}_4\text{O}_4$   $[\text{M} + \text{H}]^+$ : 533.2189, Found: 533.2182.

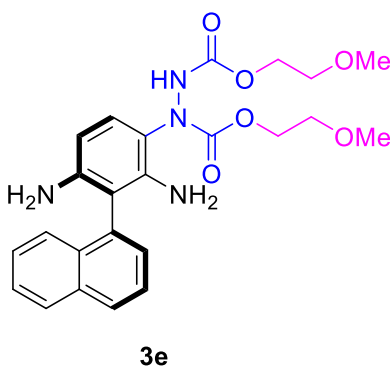

(*R*)-Bis(methoxymethyl)

1-(2,4-diamino-3-(naphthalen-1-

yl)phenyl)hydrazine-1,2-dicarboxylate (**3e**) was prepared according to the General Procedure G as yellow solid (chromatography eluent: petroleum ether/ethyl acetate = 1:1 to 1:3) in 88% yield (82.4 mg, 70% ee).

$[\alpha]_{\text{D}}^{25}$ : -37.10 ( $c = 0.30$ ,  $\text{CHCl}_3$ ). HPLC (AD,  $i\text{-PrOH}/n\text{-hexane} = 30/70$ , flow rate = 1.0 mL/min,  $\lambda = 210$  nm)  $t_{\text{R}} = 46.7$  min (minor), 51.3 min (major).

$^1\text{H NMR}$  (400 MHz,  $\text{CDCl}_3$ )  $\delta$  7.90 (d,  $J = 8.2$  Hz, 2H), 7.65 (d,  $J = 8.1$  Hz, 1H), 7.57 (t,  $J = 7.3$  Hz, 2H), 7.52-7.47 (m, 2H), 7.41 (t,  $J = 7.8$  Hz, 1H), 7.08-7.00 (m, 1H), 6.17 (d,  $J = 8.4$  Hz, 1H), 4.31-4.25 (m, 4H), 3.57-3.56 (m, 4H), 3.34-3.31 (m, 6H) ppm.

$^{13}\text{C NMR}$  (100 MHz,  $\text{CDCl}_3$ )  $\delta$  156.9, 156.3, 145.4, 143.4, 134.3, 132.5, 131.7, 129.2, 128.9, 128.6, 128.4, 126.6, 126.4, 126.3, 125.3, 118.4, 111.1, 104.5, 70.4 (2C), 65.9, 65.0, 58.9, 58.8 ppm.

HRMS (ES+) Calcd for  $\text{C}_{24}\text{H}_{29}\text{N}_4\text{O}_6$   $[\text{M} + \text{H}]^+$ : 469.2087, Found: 469.2083.

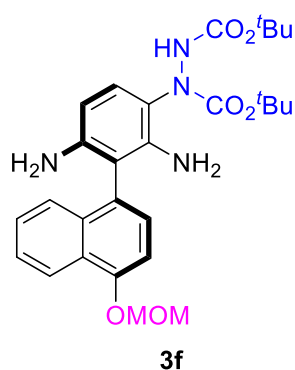

(*R*)-Di-*tert*-butyl

1-(2,4-diamino-3-(4-(methoxymethoxy)naphthalen-1-

yl)phenyl)hydrazine-1,2-dicarboxylate (**3f**) was prepared according to the



General Procedure G as yellow solid (chromatography eluent: petroleum ether/ethyl acetate = 8:1 to 2:1) in 97% yield (101.7 mg, 90% ee).

$[\alpha]_{\text{D}}^{25}$ : -31.00 ( $c = 0.14$ ,  $\text{CHCl}_3$ ). HPLC (IC,  $i$ -PrOH/ $n$ -hexane = 10/90, flow rate = 1.0 mL/min,  $\lambda = 210$  nm)  $t_{\text{R}} = 21.5$  min (minor), 26.3 min (major).

$^1\text{H NMR}$  (400 MHz,  $\text{CDCl}_3$ )  $\delta$  8.33 (d,  $J = 8.0$  Hz, 1H), 7.62-7.48 (m, 2H), 7.40-7.38 (m, 2H), 7.19-6.93 (m, 4H), 5.42 (s, 2H), 3.56 (s, 3H), 1.43 (s, 18H) ppm.

$^{13}\text{C NMR}$  (100 MHz,  $\text{CDCl}_3$ )  $\delta$  156.4, 154.9, 154.2, 152.9, 144.0, 132.9, 129.3, 128.8, 127.3, 126.7, 125.7 (2C), 125.4, 122.1, 117.6, 109.7, 108.1 (2C), 94.5, 81.3 (2C), 56.2, 28.1, 28.0 ppm.

HRMS (ES+) Calcd for  $\text{C}_{28}\text{H}_{37}\text{N}_4\text{O}_6$   $[\text{M} + \text{H}]^+$ : 525.2713, Found: 525.2720.

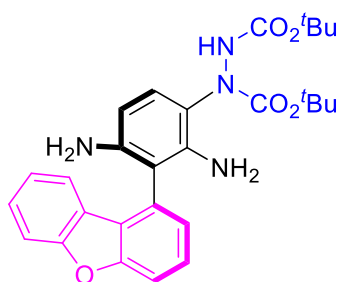

**3g**

**(R)-Di-tert-butyl 1-(2,4-diamino-3-(dibenzo[*b,d*]furan-1-yl)phenyl)hydrazine-1,2-dicarboxylate (3g)** was prepared according to the

General Procedure G as yellow solid (chromatography eluent: petroleum ether/ethyl acetate = 10:1 to 5:1) in 93% yield (93.8 mg, 92% ee).

$[\alpha]_{\text{D}}^{25}$ : -82.90 ( $c = 0.29$ ,  $\text{CHCl}_3$ ). HPLC (IC,  $i$ -PrOH/ $n$ -hexane = 5/95, flow rate = 1.0 mL/min,  $\lambda = 210$  nm)  $t_{\text{R}} = 33.1$  min (minor), 53.2 min (major).

$^1\text{H NMR}$  (400 MHz,  $\text{CDCl}_3$ )  $\delta$  7.61-7.52 (m, 4H), 7.42-7.38 (m, 1H), 7.32-7.31 (m,

2H), 7.00-6.92 (m, 2H), 6.19 (d,  $J = 8.3$  Hz, 1H), 1.45 (s, 18H) ppm.

$^{13}\text{C}$  NMR (100 MHz,  $\text{CDCl}_3$ )  $\delta$  156.9, 156.6, 156.1, 155.2, 144.7, 143.2, 129.6, 128.9, 128.1, 127.2 (2C), 125.1, 123.5, 122.9, 122.2, 119.2, 111.2 (2C), 110.0, 104.0, 81.6 (2C), 28.1 (2C) ppm.

HRMS (ES+) Calcd for  $\text{C}_{28}\text{H}_{33}\text{N}_4\text{O}_5$  [ $\text{M} + \text{H}$ ] $^+$ : 505.2451, Found: 505.2448.

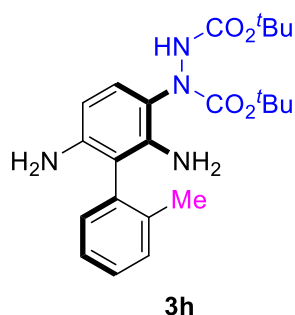

**(R)-Di-tert-butyl 1-(2,6-diamino-2'-methyl-[1,1'-biphenyl]-3-yl)hydrazine-1,2-dicarboxylate (3h)** was prepared according to the General Procedure G as yellow solid (chromatography eluent: petroleum ether/ethyl acetate = 8:1 to 3:1) in 98% yield (83.9 mg, 90% ee).

$[\alpha]_{\text{D}}^{25}$ : -18.80 ( $c = 0.28$ ,  $\text{CHCl}_3$ ). HPLC (IC,  $i$ -PrOH/ $n$ -hexane = 3/90, flow rate = 1.0 mL/min,  $\lambda = 210$  nm)  $t_{\text{R}} = 37.9$  min (minor), 45.9 min (major).

$^1\text{H}$  NMR (400 MHz,  $\text{CDCl}_3$ )  $\delta$  7.36-7.34 (m, 1H), 7.30-7.28 (m, 2H), 7.22-7.20 (m, 1H), 6.85-6.82 (m, 2H), 6.10 (d,  $J = 8.0$  Hz, 1H), 2.14 (s, 3H), 1.45 (s, 18H) ppm.

$^{13}\text{C}$  NMR (100 MHz,  $\text{CDCl}_3$ )  $\delta$  156.6, 155.2, 144.2, 138.6, 134.4, 130.9, 128.3, 127.7, 127.4, 127.0, 119.3, 112.7, 105.5, 103.8, 81.4 (2C), 28.2, 28.1, 19.2 ppm.

HRMS (ES+) Calcd for  $\text{C}_{23}\text{H}_{33}\text{N}_4\text{O}_4$  [ $\text{M} + \text{H}$ ] $^+$ : 429.2502, Found: 429.2498.

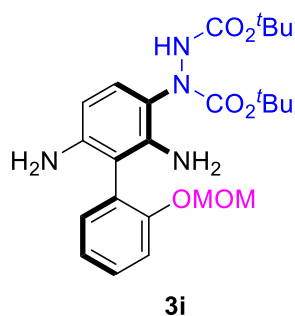

**(R)-Di-tert-butyl 1-(2,6-diamino-2'-(methoxymethoxy)-[1,1'-biphenyl]-3-yl)hydrazine-1,2-dicarboxylate (3i)** was prepared according to the General Procedure G as yellow solid (chromatography eluent: petroleum ether/ethyl acetate = 8:1 to 2:1) in 98% yield (92.9 mg, 89% ee).

$[\alpha]_{D^{25}}$ : -16.30 ( $c = 0.24$ ,  $\text{CHCl}_3$ ). HPLC (IC,  $i$ -PrOH/ $n$ -hexane = 5/95, flow rate = 1.0 mL/min,  $\lambda = 210$  nm)  $t_R = 60.8$  min (minor), 82.9 min (major).

$^1\text{H NMR}$  (400 MHz,  $\text{CDCl}_3$ )  $\delta$  7.36 (t,  $J = 7.3$  Hz, 1H), 7.27-7.23 (m, 2H), 7.16-7.13 (m, 1H), 6.90-6.80 (m, 2H), 6.11 (d,  $J = 7.8$  Hz, 1H), 5.05 (s, 2H), 3.35 (s, 3H), 1.45 (s, 18H) ppm.

$^{13}\text{C NMR}$  (100 MHz,  $\text{CDCl}_3$ )  $\delta$  156.5, 155.3, 154.1, 144.7, 143.4, 132.7, 131.1, 129.7, 128.8, 128.0, 125.1, 123.4, 116.5, 110.2, 104.1, 94.7, 81.5, 56.1, 28.2, 28.1 ppm.

**HRMS (ES<sup>+</sup>)** Calcd for  $\text{C}_{24}\text{H}_{35}\text{N}_4\text{O}_6$   $[\text{M} + \text{H}]^+$ : 475.2557, Found: 475.2549.

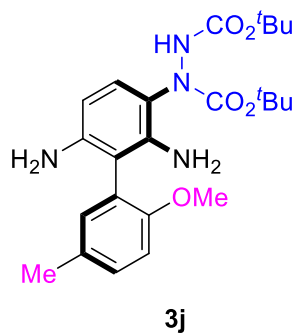

**(R)-Di-tert-butyl 1-(2,6-diamino-2'-methoxy-5'-methyl-[1,1'-biphenyl]-3-yl)hydrazine-1,2-dicarboxylate (3j)**

yl)hydrazine-1,2-dicarboxylate (3j) was prepared according to the General Procedure G as yellow solid (chromatography eluent: petroleum ether/ethyl acetate = 8:1 to 2:1) in 98% yield (89.8 mg, 91% ee).

$[\alpha]_{\text{D}}^{25}$ : +7.50 ( $c = 0.39$ ,  $\text{CHCl}_3$ ). HPLC (OD,  $i\text{-PrOH}/n\text{-hexane} = 5/95$ , flow rate = 0.7 mL/min,  $\lambda = 210$  nm)  $t_{\text{R}} = 30.1$  min (minor), 33.2 min (major).

$^1\text{H NMR}$  (400 MHz,  $\text{CDCl}_3$ )  $\delta$  7.15 (d,  $J = 7.7$  Hz, 1H), 7.05 (s, 1H), 6.93-6.80 (m, 3H), 6.11 (d,  $J = 7.7$  Hz, 1H), 3.72 (s, 3H), 2.30 (s, 3H), 1.45 (s, 18H) ppm.

$^{13}\text{C NMR}$  (100 MHz,  $\text{CDCl}_3$ )  $\delta$  156.4, 155.3, 144.7, 143.2, 133.0, 131.0, 129.9, 127.6, 123.1, 119.6, 111.8, 110.5, 104.7, 104.2, 81.4, 81.2, 55.8, 28.2, 28.1, 20.4 ppm.

HRMS (ES+) Calcd for  $\text{C}_{24}\text{H}_{35}\text{N}_4\text{O}_5$   $[\text{M} + \text{H}]^+$ : 459.2607, Found: 459.2598.

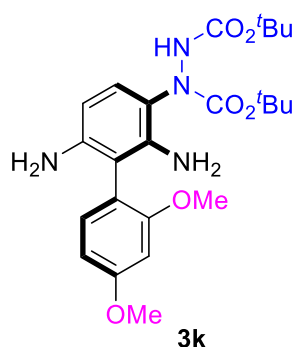

(R)-Di-tert-butyl 1-(2,6-diamino-2',4'-dimethoxy-[1,1'-biphenyl]-3-yl)hydrazine-1,2-dicarboxylate (3k) was prepared according to the General Procedure G as yellow solid (chromatography eluent: petroleum ether/ethyl acetate = 6:1 to 2:1) in 95% yield (90.1 mg, 81% ee).

$[\alpha]_{\text{D}}^{25}$ : -3.20 ( $c = 0.23$ ,  $\text{CHCl}_3$ ). HPLC (IC,  $i\text{-PrOH}/n\text{-hexane} = 10/90$ , flow rate = 1.0 mL/min,  $\lambda = 210$  nm)  $t_{\text{R}} = 51.5$  min (minor), 66.3 min (major).

$^1\text{H NMR}$  (400 MHz,  $\text{CDCl}_3$ )  $\delta$  7.15-7.13 (m, 1H), 6.96-6.83 (m, 2H), 6.61-6.59 (m,

2H), 6.09 (d,  $J = 7.8$  Hz, 1H), 3.84 (s, 3H), 3.73 (s, 3H), 1.45 (s, 18H) ppm.

$^{13}\text{C}$  NMR (100 MHz,  $\text{CDCl}_3$ )  $\delta$  160.9, 158.5, 156.4, 155.2, 144.9, 143.6, 133.1, 127.5, 119.5, 115.6, 110.0, 105.5, 104.1, 99.4, 81.4 (2C), 55.6, 55.3, 28.1, 28.0 ppm.

HRMS (ES+) Calcd for  $\text{C}_{24}\text{H}_{35}\text{N}_4\text{O}_6$   $[\text{M} + \text{H}]^+$ : 475.2557, Found: 475.2548.

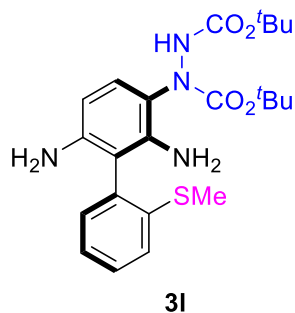

**(R)-Di-tert-butyl 1-(2,6-diamino-2'-(methylthio)-[1,1'-biphenyl]-3-yl)hydrazine-1,2-dicarboxylate (31)** was prepared according to the General Procedure G as yellow solid (chromatography eluent: petroleum ether/ethyl acetate = 8:1 to 2:1) in 88% yield (90.0 mg, 91% ee).

$[\alpha]_{\text{D}}^{25}$ : -15.70 ( $c = 0.39$ ,  $\text{CHCl}_3$ ). HPLC (IC,  $i$ -PrOH/ $n$ -hexane = 5/95, flow rate = 1.0 mL/min,  $\lambda = 210$  nm)  $t_{\text{R}} = 67.3$  min (minor), 99.4 min (major).

$^1\text{H}$  NMR (400 MHz,  $\text{CDCl}_3$ )  $\delta$  7.41-7.36 (m, 1H), 7.29-7.27 (m, 1H), 7.24-7.22 (m, 2H), 7.03-6.82 (m, 2H), 6.12 (d,  $J = 7.9$  Hz, 1H), 2.35 (s, 3H), 1.45 (s, 18H) ppm.

$^{13}\text{C}$  NMR (100 MHz,  $\text{CDCl}_3$ )  $\delta$  156.4, 155.2, 144.4, 143.3, 140.4, 132.6, 131.1, 128.9, 125.5, 124.6, 119.6, 111.4, 105.8, 104.0, 81.5 (2C), 28.2, 28.0, 14.7 ppm.

HRMS (ES+) Calcd for  $\text{C}_{24}\text{H}_{35}\text{N}_4\text{O}_5$   $[\text{M} + \text{H}]^+$ : 459.2607, Found: 459.2598.

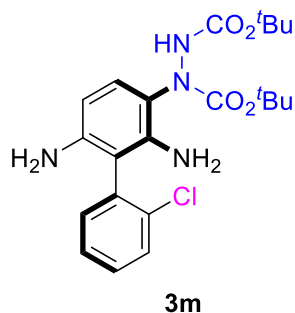

**(R)-Di-tert-butyl 1-(2,6-diamino-2'-chloro-[1,1'-biphenyl]-3-yl)hydrazine-1,2-dicarboxylate (3m)** was prepared according to the General Procedure G as yellow solid (chromatography eluent: petroleum ether/ethyl acetate = 8:1 to 2:1) in 96% yield (86.1 mg, 92% ee).

$[\alpha]_{D^{25}}$ : -9.50 ( $c = 0.33$ ,  $\text{CHCl}_3$ ). HPLC (IC,  $i\text{-PrOH}/n\text{-hexane} = 10/90$ , flow rate = 1.0 mL/min,  $\lambda = 210$  nm)  $t_R = 15.0$  min (minor), 18.3 min (major).

$^1\text{H NMR}$  (400 MHz,  $\text{CDCl}_3$ )  $\delta$  7.56 (d,  $J = 7.1$  Hz, 1H), 7.40-7.34 (m, 3H), 7.07-6.69 (m, 2H), 6.11 (d,  $J = 8.2$  Hz, 1H), 1.45 (s, 18H) ppm.

$^{13}\text{C NMR}$  (100 MHz,  $\text{CDCl}_3$ )  $\delta$  156.5, 155.1, 144.3, 143.0, 135.5, 134.0, 133.1, 130.5, 129.6, 128.4, 128.1, 119.6, 110.0, 104.0, 81.5 (2C), 28.2, 28.0 ppm.

**HRMS** (ES+) Calcd for  $\text{C}_{22}\text{H}_{30}\text{ClN}_4\text{O}_4$   $[\text{M} + \text{H}]^+$ : 449.1956, Found: 449.1947.

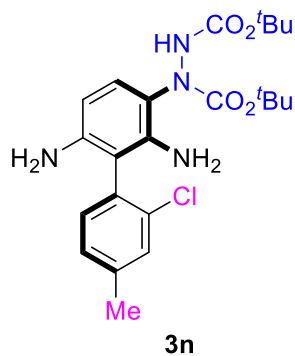

**(R)-Di-tert-butyl 1-(2,6-diamino-2'-chloro-4'-methyl-[1,1'-biphenyl]-3-yl)hydrazine-1,2-dicarboxylate (3n)** was prepared according to the General

Procedure G as yellow solid (chromatography eluent: petroleum ether/ethyl acetate = 8:1 to 2:1) in 98% yield (90.6 mg, 92% ee).

$[\alpha]_{\text{D}}^{25}$ : -12.90 ( $c = 0.23$ ,  $\text{CHCl}_3$ ). HPLC (IC,  $i$ -PrOH/ $n$ -hexane = 10/90, flow rate = 1.0 mL/min,  $\lambda = 210$  nm)  $t_{\text{R}} = 40.2$  min (minor), 58.5 min (major).

$^1\text{H NMR}$  (400 MHz,  $\text{CDCl}_3$ )  $\delta$  7.38 (s, 1H), 7.24-7.17 (m, 2H), 6.99-6.81 (m, 2H), 6.11 (d,  $J = 8.0$  Hz, 1H), 2.38 (s, 3H), 1.45 (s, 18H) ppm.

$^{13}\text{C NMR}$  (100 MHz,  $\text{CDCl}_3$ )  $\delta$  156.5, 155.1, 144.4, 143.2, 139.9, 132.7, 130.9, 130.7, 128.9, 128.2, 119.5, 110.9, 105.7, 103.9, 81.5 (2C), 28.2, 28.0, 21.0 ppm.

HRMS (ES+) Calcd for  $\text{C}_{23}\text{H}_{32}\text{ClN}_4\text{O}_4$   $[\text{M} + \text{H}]^+$ : 463.2112, Found: 463.2110.

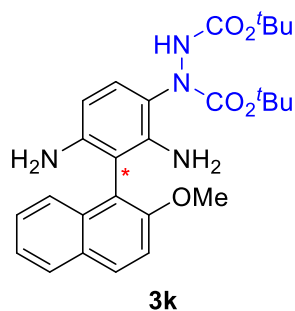

**Di-tert-butyl 1-(2,4-diamino-3-(2-methoxynaphthalen-1-yl)phenyl)hydrazine-1,2-dicarboxylate (3k)** was prepared according to the General Procedure G as yellow solid (chromatography eluent: petroleum ether/ethyl acetate = 8:1 to 2:1) in 90% yield (89.0 mg, 24% ee).

$[\alpha]_{\text{D}}^{25}$ : -0.20 ( $c = 0.23$ ,  $\text{CHCl}_3$ ). HPLC (OJ,  $i$ -PrOH/ $n$ -hexane = 5/95, flow rate = 1.0 mL/min,  $\lambda = 210$  nm)  $t_{\text{R}} = 16.9$  min (major), 29.9 min (minor).

$^1\text{H NMR}$  (400 MHz,  $\text{CDCl}_3$ )  $\delta$  7.92 (d,  $J = 9.0$  Hz, 1H), 7.83 (d,  $J = 8.7$  Hz, 1H), 7.55-7.36 (m, 4H), 7.00-6.87 (m, 2H), 6.19 (d,  $J = 7.9$  Hz, 1H), 3.88 (s, 3H), 1.46 (s,

18H) ppm.

$^{13}\text{C}$  NMR (100 MHz,  $\text{CDCl}_3$ )  $\delta$  156.4, 155.2, 145.2, 143.8, 133.0, 130.2 (2C), 129.6, 128.0 (2C), 127.0, 124.6, 124.0, 119.6, 116.7, 114.1, 107.2, 110.9, 104.1, 81.3 (2C), 28.2, 28.1 ppm.

HRMS (ES+) Calcd for  $\text{C}_{27}\text{H}_{35}\text{N}_4\text{O}_5$   $[\text{M} + \text{H}]^+$ : 495.2607, Found: 495.2616.

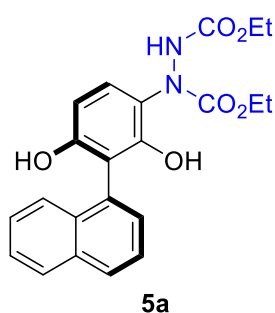

(*R*)-Diethyl 1-(2,4-dihydroxy-3-(naphthalen-1-yl)phenyl)hydrazine-1,2-dicarboxylate (**5a**) was prepared according to the General Procedure G as yellow solid (chromatography eluent: petroleum ether/ethyl acetate = 6:1 to 2:1) in 98% yield (80.4 mg, 99% ee).

$[\alpha]_{\text{D}}^{25}$ : -97.40 ( $c = 0.25$ , Acetone). HPLC (AD, *i*-PrOH/*n*-hexane = 10/90, flow rate = 1.0 mL/min,  $\lambda = 210$  nm)  $t_{\text{R}} = 55.5$  min (major).

$^1\text{H}$  NMR (400 MHz,  $\text{CDCl}_3$ )  $\delta$  8.94 (s, 1H), 7.92 (t,  $J = 8.3$  Hz, 2H), 7.62-7.57 (m, 2H), 7.53-7.41 (m, 4H), 7.12 (d,  $J = 8.0$  Hz, 1H), 6.60 (d,  $J = 8.7$  Hz, 1H), 5.08 (s, 1H), 4.25-4.16 (m, 4H), 1.28-1.24 (m, 6H) ppm.

$^{13}\text{C}$  NMR (100 MHz,  $\text{CDCl}_3$ )  $\delta$  159.4, 156.8, 155.0, 152.6, 134.1, 132.2, 129.4, 129.2 (2C), 128.4, 126.5, 126.3, 125.8 (2C), 125.5, 121.1, 115.0, 107.0, 63.3, 62.2, 14.4, 14.2 ppm.



HRMS (ES+) Calcd for C<sub>22</sub>H<sub>23</sub>N<sub>2</sub>O<sub>6</sub> [M + H]<sup>+</sup>: 411.1556, Found: 411.1566.

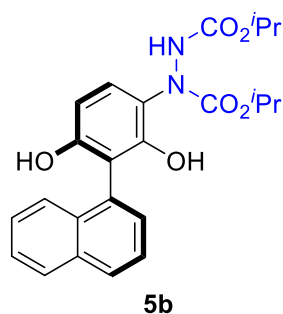

**(R)-Diisopropyl 1-(2,4-dihydroxy-3-(naphthalen-1-yl)phenyl)hydrazine-1,2-dicarboxylate (5b)** was prepared according to the General Procedure G as yellow solid (chromatography eluent: petroleum ether/ethyl acetate = 6:1 to 2:1) in 93% yield (81.5 mg, 90% ee).

$[\alpha]_{\text{D}}^{25}$ : -104.80 ( $c = 0.26$ , CDCl<sub>3</sub>). HPLC (AD, *i*-PrOH/*n*-hexane = 7/93, flow rate = 1.0 mL/min,  $\lambda = 210$  nm)  $t_{\text{R}} = 55.5$  min (major), 94.4 min (minor).

<sup>1</sup>H NMR (400 MHz, CDCl<sub>3</sub>)  $\delta$  9.06 (s, 1H), 7.93 (t,  $J = 8.8$  Hz, 2H), 7.61-7.57 (m, 2H), 7.53-7.49 (m, 2H), 7.44-7.40 (m, 1H), 7.24-7.09 (m, 2H), 6.60 (d,  $J = 8.7$  Hz, 1H), 6.42 (s, 1H), 5.02-4.94 (m, 2H), 1.26 (d,  $J = 6.2$  Hz, 12H) ppm.

<sup>13</sup>C NMR (100 MHz, CDCl<sub>3</sub>)  $\delta$  159.2, 156.4, 154.9, 152.7, 134.1, 132.2, 129.5, 129.2 (2C), 128.4, 126.4, 126.3, 125.8 (2C), 125.6, 121.3, 114.9, 106.8, 71.6, 70.1, 21.9, 21.8 ppm.

HRMS (ES+) Calcd for C<sub>24</sub>H<sub>27</sub>N<sub>2</sub>O<sub>6</sub> [M + H]<sup>+</sup>: 439.1869, Found: 439.1862.

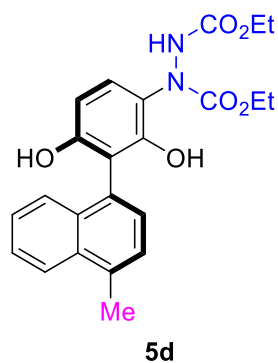

**(R)-Diethyl 1-(2,4-dihydroxy-3-(4-methylnaphthalen-1-yl)phenyl)hydrazine-1,2-dicarboxylate (5d)** was prepared according to the General Procedure G as yellow solid (chromatography eluent: petroleum ether/ethyl acetate = 6:1 to 2:1) in 94% yield (79.7 mg, 94% ee).

$[\alpha]_{\text{D}}^{25}$ : -104.50 ( $c = 0.32$ ,  $\text{CDCl}_3$ ). HPLC (AD,  $i\text{-PrOH}/n\text{-hexane} = 10/90$ , flow rate = 1.0 mL/min,  $\lambda = 210$  nm)  $t_{\text{R}} = 44.8$  min (minor), 49.2 min (major).

$^1\text{H NMR}$  (400 MHz,  $\text{CDCl}_3$ )  $\delta$  8.88 (s, 1H), 8.08 (d,  $J = 8.4$  Hz, 1H), 7.63 (d,  $J = 8.2$  Hz, 1H), 7.56 (t,  $J = 6.9$  Hz, 2H), 7.46-7.41 (m, 3H), 7.11 (d,  $J = 8.0$  Hz, 1H), 6.60 (d,  $J = 8.7$  Hz, 1H), 5.15 (s, 1H), 4.27-4.16 (m, 4H), 2.76 (s, 3H), 1.28-1.24 (m, 6H) ppm.

$^{13}\text{C NMR}$  (100 MHz,  $\text{CDCl}_3$ )  $\delta$  159.3, 156.1, 155.1, 152.6, 135.6, 133.2, 132.1, 129.0, 128.5, 127.5, 126.6 (2C), 126.1 (2C), 124.5, 121.1, 115.2, 106.8, 63.2, 62.2, 19.5, 14.3, 14.2 ppm.

**HRMS** (ES+) Calcd for  $\text{C}_{23}\text{H}_{24}\text{N}_2\text{O}_6$   $[\text{M} + \text{H}]^+$ : 425.1713, Found: 425.1716.

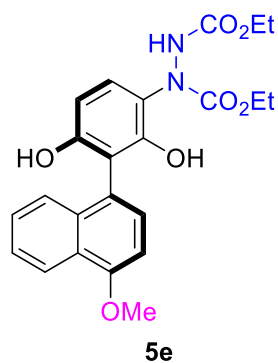

**(R)-Diethyl 1-(2,4-dihydroxy-3-(4-methoxynaphthalen-1-yl)phenyl)hydrazine-1,2-dicarboxylate (5e)** was prepared according to the General Procedure G as yellow solid (chromatography eluent: petroleum ether/ethyl acetate = 6:1 to 2:1) in 78% yield (68.7 mg, 80% ee).

$[\alpha]_{D^{25}}$ : -71.70 ( $c = 0.25$ ,  $CDCl_3$ ). HPLC (AD,  $i$ -PrOH/ $n$ -hexane = 10/90, flow rate = 1.0 mL/min,  $\lambda = 210$  nm)  $t_R = 46.4$  min (major), 61.2 min (minor).

$^1H$  NMR (400 MHz,  $CDCl_3$ )  $\delta$  8.88 (s, 1H), 8.35 (d,  $J = 8.2$  Hz, 1H), 7.55-7.43 (m, 5H), 7.10 (d,  $J = 7.8$  Hz, 1H), 6.93 (d,  $J = 7.9$  Hz, 1H), 6.60 (d,  $J = 8.7$  Hz, 1H), 5.15 (s, 1H), 4.25-4.17 (m, 4H), 4.04 (s, 3H), 1.27-1.23 (m, 6H) ppm.

$^{13}C$  NMR (100 MHz,  $CDCl_3$ )  $\delta$  159.3, 156.1, 155.3, 152.8, 133.1, 128.9, 127.0, 126.2, 125.6 (2C), 125.2, 122.4 (2C), 121.0, 120.8, 114.9, 106.7, 103.8, 63.4, 63.3, 55.5, 14.4, 14.2 ppm.

**HRMS** (ES+) Calcd for  $C_{23}H_{25}N_2O_7$   $[M + H]^+$ : 441.1662, Found: 441.1663.

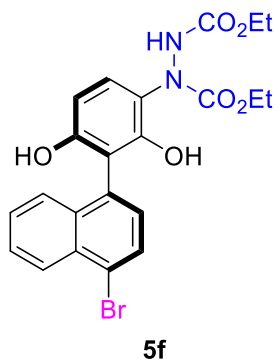

**(R)-Diethyl 1-(3-(4-bromonaphthalen-1-yl)-2,4-dihydroxyphenyl)hydrazine-1,2-dicarboxylate (5f)** was prepared according to the General Procedure G as yellow solid (chromatography eluent: petroleum ether/ethyl acetate = 6:1 to 2:1) in 98% yield (95.7 mg, 99% ee).

$[\alpha]_D^{25}$ : -87.50 ( $c = 0.40$ ,  $\text{CDCl}_3$ ). HPLC (AD,  $i\text{-PrOH}/n\text{-hexane} = 10/90$ , flow rate = 1.0 mL/min,  $\lambda = 210$  nm)  $t_R = 41.8$  min (major).

$^1\text{H NMR}$  (400 MHz,  $\text{CDCl}_3$ )  $\delta$  9.05 (s, 1H), 8.33 (d,  $J = 8.4$  Hz, 1H), 7.89 (d,  $J = 7.6$  Hz, 1H), 7.62 (t,  $J = 7.6$  Hz, 2H), 7.50-7.35 (m, 3H), 7.10 (d,  $J = 8.4$  Hz, 1H), 6.57 (d,  $J = 8.7$  Hz, 1H), 5.17 (s, 1H), 4.24-4.16 (m, 4H), 1.26-1.23 (m, 6H) ppm.

$^{13}\text{C NMR}$  (100 MHz,  $\text{CDCl}_3$ )  $\delta$  159.5, 156.1, 154.9, 152.6, 133.4, 132.5, 129.9, 129.8, 129.4, 129.1, 127.7 (2C), 127.3, 126.1, 124.0, 121.1, 114.4, 107.1, 63.5, 63.4, 14.3, 14.2 ppm.

**HRMS** (ES+) Calcd for  $\text{C}_{22}\text{H}_{22}\text{BrN}_2\text{O}_6$   $[\text{M} + \text{H}]^+$ : 489.0661, Found: 489.0658.

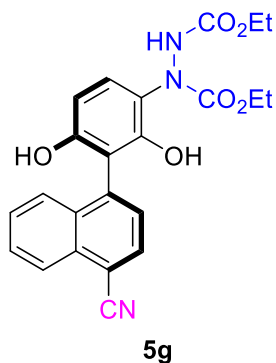

**(R)-Diethyl 1-(3-(4-cyanonaphthalen-1-yl)-2,4-dihydroxyphenyl)hydrazine-1,2-dicarboxylate (5g)** was prepared according to the General Procedure G as yellow solid (chromatography eluent: petroleum ether/ethyl acetate = 6:1 to 2:1) in 92% yield (80.1 mg, 99% ee).

$[\alpha]_{D^{25}}$ : -72.00 ( $c = 0.20$ , Acetone). HPLC (AD, *i*-PrOH/*n*-hexane = 10/90, flow rate = 1.0 mL/min,  $l = 210$  nm)  $t_R = 69.1$  min (major).

$^1\text{H NMR}$  (400 MHz,  $d_6$ -Acetone)  $\delta$  9.42 (s, 1H), 9.22 (s, 1H), 8.54 (s, 1H), 8.23 (d,  $J = 8.3$  Hz, 1H), 8.13 (d,  $J = 7.4$  Hz, 1H), 7.79-7.74 (m, 2H), 7.60 (t,  $J = 7.8$  Hz, 2H), 7.23 (d,  $J = 8.6$  Hz, 1H), 6.63 (d,  $J = 8.6$  Hz, 1H), 4.21-4.16 (m, 4H), 1.28-1.19 (m, 6H) ppm.

$^{13}\text{C NMR}$  (100 MHz,  $d_6$ -Acetone)  $\delta$  160.8, 157.0, 156.0, 153.7, 139.9, 133.3, 133.2, 133.1, 130.7, 129.1, 128.9, 128.04, 127.96, 125.5, 122.3, 118.4, 114.9, 109.8, 107.9, 63.4, 63.3, 14.7, 14.5 ppm.

**HRMS** (ES+) Calcd for  $\text{C}_{23}\text{H}_{22}\text{N}_3\text{O}_6$   $[\text{M} + \text{H}]^+$ : 436.1509, Found: 436.1508.

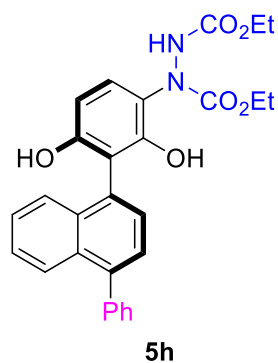

**(R)-Diethyl 1-(2,4-dihydroxy-3-(4-phenylnaphthalen-1-yl)phenyl)hydrazine-1,2-dicarboxylate (5h)** was prepared according to the General Procedure G as yellow solid (chromatography eluent: petroleum ether/ethyl acetate = 6:1 to 2:1) in 84% yield (81.7 mg, 90% ee).

$[\alpha]_{\text{D}}^{25}$ : -74.40 ( $c = 0.32$ ,  $\text{CDCl}_3$ ). HPLC (AD,  $i$ -PrOH/ $n$ -hexane = 10/90, flow rate = 1.0 mL/min,  $\lambda = 230$  nm)  $t_{\text{R}} = 37.2$  min (major), 55.5 min (minor).

$^1\text{H NMR}$  (400 MHz,  $\text{CDCl}_3$ )  $\delta$  9.07 (s, 1H), 7.98-7.96 (m, 1H), 7.69-7.67 (m, 1H), 7.58-7.50 (m, 6H), 7.47-7.38 (m, 4H), 7.13 (d,  $J = 7.8$  Hz, 1H), 6.63 (d,  $J = 8.7$  Hz, 1H), 5.10 (s, 1H), 4.32-4.19 (m, 4H), 1.35-1.25 (m, 6H) ppm.

$^{13}\text{C NMR}$  (100 MHz,  $\text{CDCl}_3$ )  $\delta$  159.5, 156.1, 155.1, 152.7, 141.3, 140.5, 132.4, 132.3, 130.1 (2C), 129.2, 128.8, 128.3 (2C), 127.4, 126.9, 126.6, 126.4, 125.8, 121.1, 115.1, 107.0, 63.5, 63.4, 14.4, 14.3 ppm.

**HRMS** (ES+) Calcd for  $\text{C}_{28}\text{H}_{27}\text{N}_2\text{O}_6$   $[\text{M} + \text{H}]^+$ : 487.1869, Found: 487.1868.

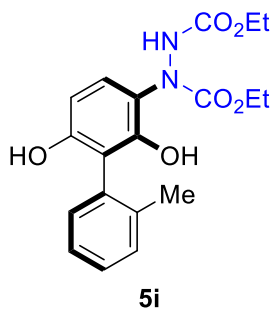

**(R)-Diethyl 1-(2,6-dihydroxy-2'-methyl-[1,1'-biphenyl]-3-yl)hydrazine-1,2-dicarboxylate (5i)** was prepared according to the General Procedure C as yellow solid (chromatography eluent: petroleum ether/ethyl acetate = 6:1 to 2:1) in 99% yield (74.1 mg, 97% ee).

$[\alpha]_{\text{D}}^{25}$ : -40.80 ( $c = 0.27$ ,  $\text{CDCl}_3$ ). HPLC (OD,  $i$ -PrOH/ $n$ -hexane = 10/90, flow rate = 1.0 mL/min,  $\lambda = 210$  nm)  $t_{\text{R}} = 21.4$  min (major), 27.4 min (minor).

$^1\text{H NMR}$  (400 MHz,  $\text{CDCl}_3$ )  $\delta$  8.96 (s, 1H), 7.53 (s, 1H), 7.36-7.28 (m, 3H), 7.25-7.23 (m, 1H), 7.02 (d,  $J = 8.4$  Hz, 1H), 6.53 (d,  $J = 8.7$  Hz, 1H), 5.11 (s, 1H), 4.25-4.20 (m, 4H), 2.17 (s, 3H), 1.28-1.20 (m, 6H) ppm.

$^{13}\text{C NMR}$  (100 MHz,  $\text{CDCl}_3$ )  $\delta$  159.4, 156.2, 154.3, 151.9, 138.7, 131.1, 130.7, 130.6, 128.8, 128.6, 126.4, 120.9, 116.4, 106.7, 63.4, 63.3, 19.4, 14.3, 14.2 ppm.

**HRMS** (ES<sup>+</sup>) Calcd for  $\text{C}_{19}\text{H}_{23}\text{N}_2\text{O}_6$   $[\text{M} + \text{H}]^+$ : 375.1556, Found: 375.1550.

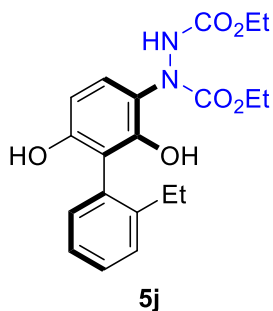

**(R)-Diethyl 1-(2'-ethyl-2,6-dihydroxy-[1,1'-biphenyl]-3-yl)hydrazine-1,2-**

**dicarboxylate (5j)** was prepared according to the General Procedure G as yellow solid (chromatography eluent: petroleum ether/ethyl acetate = 6:1 to 2:1) in 88% yield (68.3 mg, 78% ee).

$[\alpha]_{\text{D}}^{25}$ : -29.80 ( $c = 0.30$ ,  $\text{CDCl}_3$ ). HPLC (AD,  $i\text{-PrOH}/n\text{-hexane} = 10/90$ , flow rate = 1.0 mL/min,  $\lambda = 210$  nm)  $t_{\text{R}} = 19.5$  min (major), 22.2 min (minor).

$^1\text{H NMR}$  (400 MHz,  $\text{CDCl}_3$ )  $\delta$  8.94 (s, 1H), 7.41-7.36 (m, 3H), 7.35-7.29 (m, 1H), 7.22 (d,  $J = 7.2$  Hz, 1H), 7.03 (d,  $J = 8.2$  Hz, 1H), 6.53 (d,  $J = 8.6$  Hz, 1H), 4.95 (s, 1H), 4.32-4.15 (m, 4H), 2.48 (q,  $J = 7.6$  Hz, 2H), 1.35-1.19 (m, 6H), 1.07 (t,  $J = 7.6$  Hz, 3H) ppm.

$^{13}\text{C NMR}$  (100 MHz,  $\text{CDCl}_3$ )  $\delta$  159.4, 156.1, 154.4, 152.0, 144.7, 130.9, 130.3, 129.2, 129.1, 128.6, 126.6, 121.0, 116.4, 106.6, 64.2, 63.3, 62.3, 26.3, 14.8, 14.3 ppm.

**HRMS** (ES<sup>+</sup>) Calcd for  $\text{C}_{20}\text{H}_{25}\text{N}_2\text{O}_6$   $[\text{M} + \text{H}]^+$ : 389.1713, Found: 389.1718.

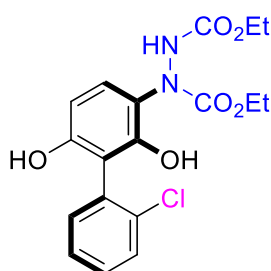

**5k**

**(R)-Diethyl 1-(2'-chloro-2,6-dihydroxy-[1,1'-biphenyl]-3-yl)hydrazine-1,2-dicarboxylate (5k)** was prepared according to the General Procedure G as yellow solid (chromatography eluent: petroleum ether/ethyl acetate = 6:1 to 2:1) in 95% yield (74.9 mg, 99% ee).

$[\alpha]_{\text{D}}^{25}$ : -35.10 ( $c = 0.26$ , Acetone). HPLC (IC,  $i\text{-PrOH}/n\text{-hexane} = 7/93$ , flow rate =



1.0 mL/min,  $\lambda = 210$  nm)  $t_R = 74.9$  min (major).

$^1\text{H NMR}$  (400 MHz,  $d_6$ -Acetone)  $\delta$  9.35 (s, 1H), 9.10 (s, 1H), 8.42 (s, 1H), 7.48-7.45 (m, 1H), 7.35-7.29 (m, 3H), 7.09 (d,  $J = 8.6$  Hz, 1H), 6.50 (d,  $J = 8.6$  Hz, 1H), 4.23-4.10 (m, 4H), 1.29-1.15 (m, 6H) ppm.

$^{13}\text{C NMR}$  (100 MHz,  $d_6$ -Acetone)  $\delta$  160.6, 156.7, 156.1, 153.5, 135.4, 134.7, 133.6, 129.9, 129.7, 129.3, 127.0, 121.9, 115.9, 107.4, 63.3, 63.1, 14.6, 14.5 ppm.

**HRMS** (ES<sup>+</sup>) Calcd for  $\text{C}_{18}\text{H}_{20}\text{ClN}_2\text{O}_6$   $[\text{M} + \text{H}]^+$ : 395.1010, Found: 395.1018.

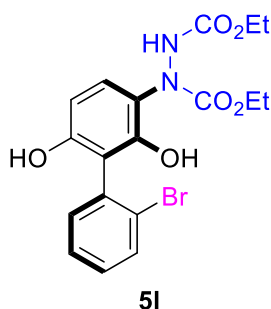

**(R)-Diethyl 1-(2'-bromo-2,6-dihydroxy-[1,1'-biphenyl]-3-yl)hydrazine-1,2-dicarboxylate (51)** was prepared according to the General Procedure G as yellow solid (chromatography eluent: petroleum ether/ethyl acetate = 6:1 to 2:1) in 95% yield (83.2 mg, 94% ee).

$[\alpha]_D^{25}$ : -52.80 ( $c = 0.25$ ,  $\text{CDCl}_3$ ). HPLC (IC,  $i$ -PrOH/ $n$ -hexane = 10/90, flow rate = 1.0 mL/min,  $\lambda = 230$  nm)  $t_R = 49.4$  min (major), 70.5 min (minor).

$^1\text{H NMR}$  (400 MHz,  $\text{CDCl}_3$ )  $\delta$  9.08 (s, 1H), 7.72 (d,  $J = 7.9$  Hz, 1H), 7.61 (s, 1H), 7.41 (t,  $J = 7.2$  Hz, 1H), 7.34 (d,  $J = 6.8$  Hz, 1H), 7.28-7.24 (m, 1H), 7.03 (d,  $J = 8.4$  Hz, 1H), 6.49 (d,  $J = 8.6$  Hz, 1H), 5.44 (s, 1H), 4.24-4.15 (m, 4H), 1.34-1.20 (m, 6H) ppm.

$^{13}\text{C NMR}$  (100 MHz,  $\text{CDCl}_3$ )  $\delta$  159.5, 156.2, 154.4, 152.2, 133.7, 133.1, 132.5, 129.9,

129.2, 127.8, 125.5, 121.0, 116.9, 106.9, 63.5, 63.3, 14.3, 14.2 ppm.

**HRMS** (ES<sup>+</sup>) Calcd for C<sub>18</sub>H<sub>20</sub>BrN<sub>2</sub>O<sub>6</sub> [M + H]<sup>+</sup>: 439.0505, Found: 439.0510.

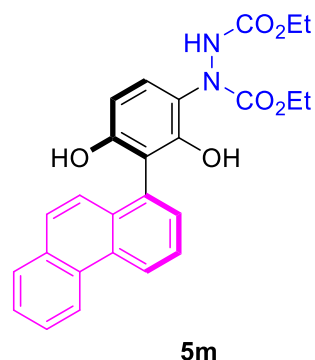

**(R)-Diethyl 1-(2,4-dihydroxy-3-(phenanthren-1-yl)phenyl)hydrazine-1,2-dicarboxylate (5m)** was prepared according to the General Procedure B as yellow solid (chromatography eluent: petroleum ether/ethyl acetate = 6:1 to 2:1) in 92% yield (84.7 mg, 99% ee).

[ $\alpha$ ]<sub>D</sub><sup>25</sup>: -43.50 (*c* = 0.22, CDCl<sub>3</sub>). HPLC (IC, *i*-PrOH/*n*-hexane = 5/95, flow rate = 1.0 mL/min,  $\lambda$  = 210 nm)  $t_R$  = 103.0 min (major).

<sup>1</sup>H NMR (400 MHz, CDCl<sub>3</sub>)  $\delta$  9.01 (s, 1H), 8.79-8.74 (m, 2H), 7.90 (d, *J* = 7.7 Hz, 1H), 7.82 (s, 1H), 7.73-7.61 (m, 4H), 7.54 (t, *J* = 7.5 Hz, 1H), 7.49-7.38 (m, 1H), 7.17-7.11 (m, 1H), 6.63 (d, *J* = 8.7 Hz, 1H), 5.35 (s, 1H), 4.24-4.16 (m, 4H), 1.29-1.22 (m, 6H) ppm.

<sup>13</sup>C NMR (100 MHz, CDCl<sub>3</sub>)  $\delta$  159.4, 156.1, 155.2, 152.8, 131.4, 130.9, 130.8, 130.6, 129.8, 129.2, 128.8, 128.3, 127.2, 127.0, 126.9, 126.8, 126.3, 122.9, 122.6, 121.0, 115.0, 107.1, 63.4, 63.3, 14.3, 14.2 ppm.

**HRMS** (ES<sup>+</sup>) Calcd for C<sub>26</sub>H<sub>25</sub>N<sub>2</sub>O<sub>6</sub> [M + H]<sup>+</sup>: 461.1713, Found: 461.1707.

#### IV. Gram-scale Synthesis and Derivation of Product

##### Gram-scale synthesis:

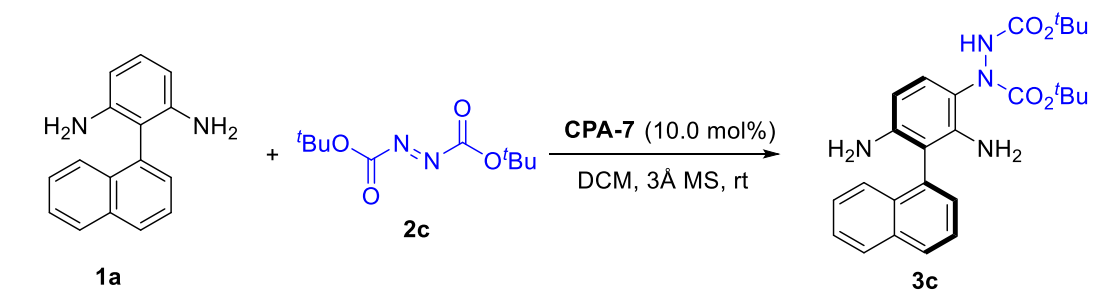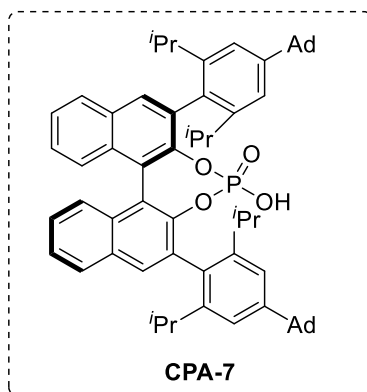

To a solution of **1a** (351.2 mg, 1.5 mmol, 1.0 equiv), **2c** (414.2 mg, 1.8 mmol, 1.2 equiv) and 3Å MS (450.0 mg) in anhydrous DCM (60.0 mL) was added CPA-7 (140.6 mg, 10.0 mol%). Then the reaction mixture was stirred at room temperature for 5 hours. The reaction mixture was directly concentrated and purified by silica gel column chromatography (petroleum ether/ethyl acetate = 8:1 to 2:1) to afford the desired products **3c** in 96% yield (668.5 mg, 92% ee).

##### Synthetic applications:

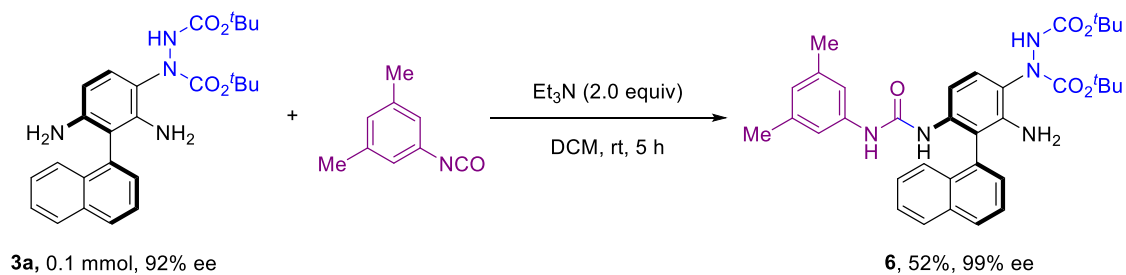

**(S)-Di-tert-butyl 1-(2-amino-4-(3-(3,5-dimethylphenyl)ureido)-3-**

**(naphthalen-1-yl)phenyl)hydrazine-1,2-dicarboxylate (6):** To a solution of 3a

(46.4 mg, 0.1 mmol, 1.0 equiv) in anhydrous DCM (3.0 mL) was added Et<sub>3</sub>N (20.2 mg, 0.2 mmol, 2.0 equiv) and 1-isocyanato-3,5-dimethylbenzene (14.7 mg, 0.1 mmol, 1.0 equiv). Then the reaction mixture was stirred at room temperature for 5 h. The reaction mixture was directly concentrated and purified by silica gel column chromatography (petroleum ether/ethyl acetate = 6:1 to 2:1) to afford the desired products 6, which was provided in 52% yield after recrystallization (31.8 mg, 99% ee).

[ $\alpha$ ]<sub>D</sub><sup>25</sup>: -12.40 (*c* = 0.23, CDCl<sub>3</sub>). HPLC (IC, *i*-PrOH/*n*-hexane = 15/85, flow rate = 1.0 mL/min,  $\lambda$  = 210 nm) *t*<sub>R</sub> = 23.9 min (major), 35.3 min (minor).

<sup>1</sup>H NMR (400 MHz, CDCl<sub>3</sub>)  $\delta$  7.83 (t, *J* = 9.6 Hz, 2H), 7.49-7.43 (m, 4H), 7.36-7.32 (m, 2H), 7.09 (s, 1H), 6.85 (s, 1H), 6.57 (s, 1H), 6.46 (s, 2H), 6.34 (s, 1H), 6.06 (s, 1H), 2.07 (s, 6H), 7.14 (s, 18H) ppm.

<sup>13</sup>C NMR (100 MHz, CDCl<sub>3</sub>)  $\delta$  156.5, 153.2, 143.5, 138.7 (2C), 137.1, 136.8, 134.1 (2C), 131.6, 131.3, 129.0, 128.4 (2C), 128.1, 126.5, 126.0 (2C), 125.1, 123.4, 120.1, 115.5, 109.1, 81.9, 81.6, 28.14, 28.07, 21.1 ppm.

HRMS (ES<sup>+</sup>) Calcd for C<sub>35</sub>H<sub>42</sub>N<sub>5</sub>O<sub>5</sub> [M + H]<sup>+</sup>: 612.3186, Found: 612.3187.

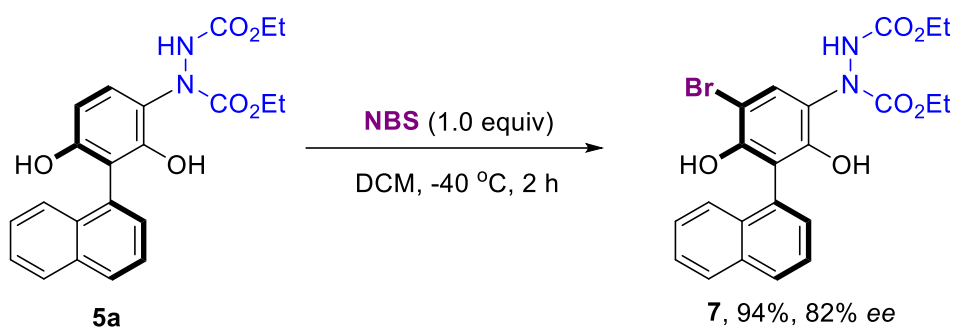

**(S)-Diethyl 1-(5-bromo-2,4-dihydroxy-3-(naphthalen-1-yl)phenyl)hydrazine-1,2-dicarboxylate (7):** To a solution of **5a** (20.5 mg, 0.05 mmol, 1.0 equiv) in anhydrous DCM (1.0 mL) was added NBS (17.8 mg, 0.05 mmol, 1.0 equiv). Then the reaction mixture was stirred at -40 °C for 2 h. The reaction mixture was directly concentrated and purified by silica gel column chromatography (petroleum ether/ethyl acetate = 6:1 to 2:1) to afford the desired products **7** in 94% yield (22.9 mg, 82% ee).

$[\alpha]_{\text{D}}^{25}$ : -30.80 ( $c = 0.13$ ,  $\text{CDCl}_3$ ). HPLC (IC,  $i$ -PrOH/ $n$ -hexane = 10/90, flow rate = 1.0 mL/min,  $\lambda = 210$  nm)  $t_{\text{R}} = 29.5$  min (minor), 50.1 min (major).

$^1\text{H NMR}$  (400 MHz,  $\text{CDCl}_3$ )  $\delta$  9.01(s, 1H), 7.94 (t,  $J = 9.0$  Hz, 2H), 7.61-7.56 (m, 2H), 7.54-7.49 (m, 2H), 7.46-7.42 (m, 2H), 5.50 (s, 1H), 4.26-4.19 (m, 4H), 1.30-1.25 (m, 6H) ppm.

$^{13}\text{C NMR}$  (100 MHz,  $\text{CDCl}_3$ )  $\delta$  159.4, 155.6, 152.5, 151.7, 133.9, 131.9, 131.6, 129.7, 129.2, 128.5, 126.5, 126.2, 125.6 (2C), 125.3, 122.0, 116.2, 98.9, 63.7, 63.5, 14.4, 14.2 ppm.

**HRMS** (ES<sup>+</sup>) Calcd for  $\text{C}_{22}\text{H}_{22}\text{BrN}_2\text{O}_6$   $[\text{M} + \text{H}]^+$ : 489.0661, Found: 489.0670.

## V. Nonlinear Relationship Experiments

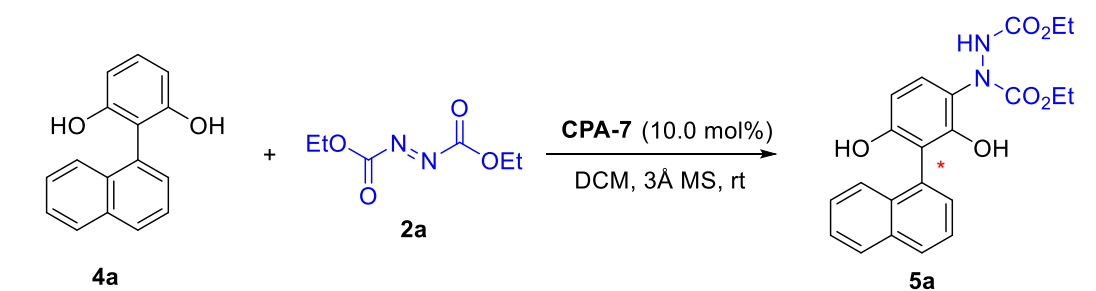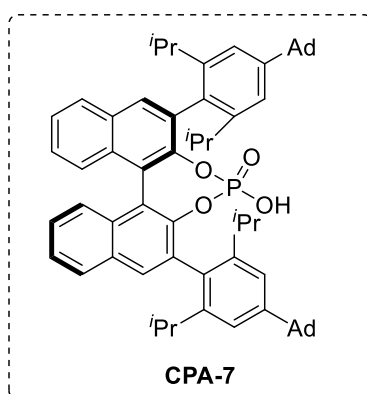

To a solution of **4a** (5.9 mg, 0.025 mmol, 1.0 equiv), **CPA-7** (2.3 mg, 10.0 mol%) with different enantiopurity (1st run: 0% ee, 2nd run: 10% ee; 3rd run: 20% ee; 4th run: 30% ee; 5th run: 40% ee; 6th run: 50% ee; 7th run: 60% ee, 8th run: 70% ee; 9th run: 80% ee; 10th run: 90% ee; 11th run: 100% ee) and 3 Å MS (15.0 mg) in anhydrous DCM (1.0 mL) was added **2a** (5.2 mg, 0.03 mmol, 1.2 equiv). The resulting mixture was stirred at room temperature for 24 hours. The mixture was filtered through a short pad of silica gel and then concentrated under reduced pressure. The *ee* values of the product **5a** were determined by HPLC.

|                            |   |     |     |     |     |     |     |     |     |     |      |
|----------------------------|---|-----|-----|-----|-----|-----|-----|-----|-----|-----|------|
| <i>ee</i> ( <b>CPA-7</b> ) | 0 | 10% | 20% | 30% | 40% | 50% | 60% | 70% | 80% | 90% | 100% |
| <i>ee</i> ( <b>5a</b> )    | 0 | 9%  | 21% | 32% | 43% | 51% | 63% | 73% | 84% | 92% | 99%  |

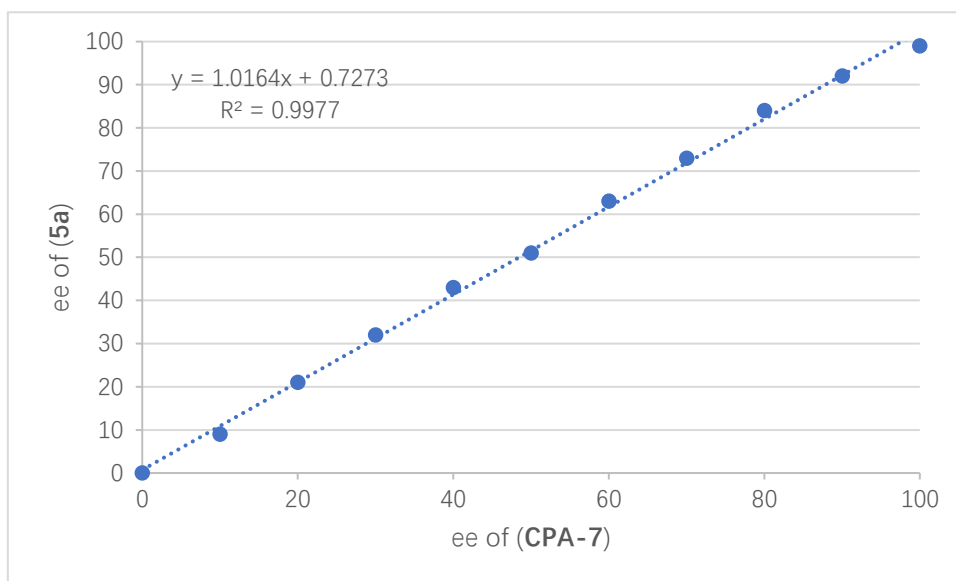

## VI. Determination of Product Structure

The absolute stereochemistry of product **5k** was determined by X-ray diffraction. The X-ray data have been deposited at the Cambridge Crystallographic Data Center (CCDC 2368440). The data can be obtained free of charge via the internet at <https://www.ccdc.cam.ac.uk/structures/>. The measurements were taken in a Bruker D8 Venture CCD diffractometer. The data were integrated by Bruker D8 Venture with  $\omega$  and  $\varphi$  scans absorption corrections. The structure solution and refinement were processed by ShelXL (Sheldrick, 2015). The stereochemistry of other products was assumed by analogy.

**Method of crystallization:** A solution of **5k** in  $\text{CH}_2\text{Cl}_2$  and petroleum ether was evaporated the solvent slowly at room temperature.

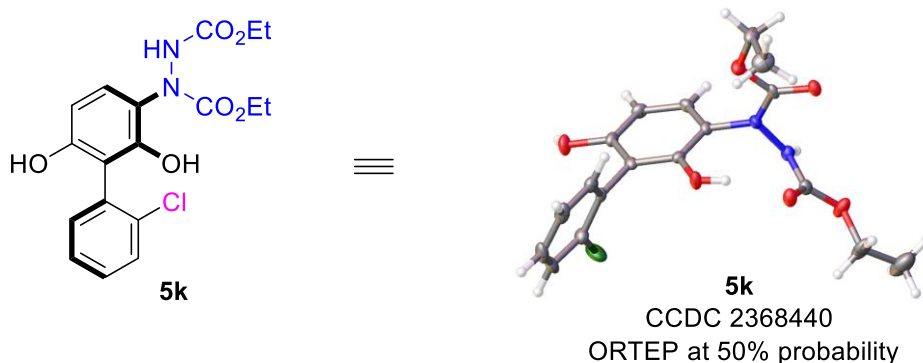

**Table 1 Crystal data and structure refinement for 5k.**

|                     |                                                    |
|---------------------|----------------------------------------------------|
| Identification code | <b>5k</b>                                          |
| Empirical formula   | $\text{C}_{18}\text{H}_{19}\text{ClN}_2\text{O}_6$ |
| Formula weight      | 394.80                                             |
| Temperature/K       | 100.00                                             |
| Crystal system      | monoclinic                                         |
| Space group         | $P2_1$                                             |
| $a/\text{\AA}$      | 8.8928(3)                                          |
| $b/\text{\AA}$      | 20.9134(8)                                         |
| $c/\text{\AA}$      | 10.5213(4)                                         |
| $\alpha/^\circ$     | 90                                                 |



|                                                |                                                               |
|------------------------------------------------|---------------------------------------------------------------|
| $\beta/^\circ$                                 | 101.4580(10)                                                  |
| $\gamma/^\circ$                                | 90                                                            |
| Volume/ $\text{\AA}^3$                         | 1917.74(12)                                                   |
| Z                                              | 4                                                             |
| $\rho_{\text{calc}}/\text{cm}^3$               | 1.367                                                         |
| $\mu/\text{mm}^{-1}$                           | 1.373                                                         |
| F(000)                                         | 824.0                                                         |
| Crystal size/ $\text{mm}^3$                    | $0.065 \times 0.065 \times 0.06$                              |
| Radiation                                      | GaK $\alpha$ ( $\lambda = 1.34139$ )                          |
| 2 $\Theta$ range for data collection/ $^\circ$ | 7.354 to 118.61                                               |
| Index ranges                                   | $-10 \leq h \leq 11, -26 \leq k \leq 26, -13 \leq l \leq 13$  |
| Reflections collected                          | 30014                                                         |
| Independent reflections                        | 8402 [ $R_{\text{int}} = 0.0532, R_{\text{sigma}} = 0.0490$ ] |
| Data/restraints/parameters                     | 8402/85/495                                                   |
| Goodness-of-fit on $F^2$                       | 1.077                                                         |
| Final R indexes [ $I \geq 2\sigma(I)$ ]        | $R_1 = 0.0537, wR_2 = 0.1255$                                 |
| Final R indexes [all data]                     | $R_1 = 0.0575, wR_2 = 0.1277$                                 |
| Largest diff. peak/hole / $e \text{\AA}^{-3}$  | 0.46/-0.37                                                    |
| Flack parameter                                | 0.014(8)                                                      |

**Table 2 Fractional Atomic Coordinates ( $\times 10^4$ ) and Equivalent Isotropic Displacement Parameters ( $\text{\AA}^2 \times 10^3$ ) for 5k.  $U_{\text{eq}}$  is defined as 1/3 of the trace of the orthogonalised  $U_{ij}$  tensor.**

| Atom | x           | y          | z           | U(eq)   |
|------|-------------|------------|-------------|---------|
| Cl1  | 11780.9(14) | 4516.4(5)  | 13050.9(11) | 33.7(3) |
| O1   | 7345(3)     | 3674.6(15) | 11124(3)    | 22.0(6) |
| O2   | 12538(3)    | 3618.9(15) | 10807(3)    | 23.9(6) |
| O3   | 6060(3)     | 3227.0(14) | 7961(3)     | 21.0(6) |
| O4   | 4094(3)     | 3935.9(14) | 7565(3)     | 18.8(6) |
| O5   | 4339(4)     | 5439.1(16) | 9656(3)     | 29.4(7) |
| O6   | 4839(3)     | 4448.8(15) | 10480(3)    | 22.9(6) |
| N1   | 6487(4)     | 4234.7(16) | 8612(3)     | 17.2(7) |
| N2   | 5930(4)     | 4834.1(16) | 8853(3)     | 17.6(7) |
| C1   | 8056(4)     | 4084.5(19) | 9181(4)     | 16.3(8) |
| C2   | 8413(4)     | 3810.5(19) | 10414(4)    | 16.0(8) |
| C3   | 9945(4)     | 3669.1(18) | 10961(4)    | 16.0(7) |
| C4   | 11081(4)    | 3796.8(19) | 10246(4)    | 17.6(8) |
| C5   | 10724(4)    | 4074(2)    | 9028(4)     | 20.1(8) |
| C6   | 9210(4)     | 4219(2)    | 8502(4)     | 18.3(8) |
| C7   | 10358(4)    | 3391.7(19) | 12292(4)    | 15.8(7) |

**Table 2 Fractional Atomic Coordinates ( $\times 10^4$ ) and Equivalent Isotropic Displacement Parameters ( $\text{\AA}^2 \times 10^3$ ) for 5k.  $U_{\text{eq}}$  is defined as 1/3 of the trace of the orthogonalised  $U_{ij}$  tensor.**

| Atom | <i>x</i>  | <i>y</i>   | <i>z</i>   | $U(\text{eq})$ |
|------|-----------|------------|------------|----------------|
| C8   | 11248(5)  | 3729(2)    | 13313(4)   | 21.9(8)        |
| C9   | 11708(5)  | 3465(2)    | 14537(4)   | 27.6(10)       |
| C10  | 11225(5)  | 2855(2)    | 14762(4)   | 28.7(10)       |
| C11  | 10286(5)  | 2514(2)    | 13784(4)   | 27.4(9)        |
| C12  | 9867(4)   | 2779(2)    | 12561(4)   | 20.5(8)        |
| C20  | 5421(4)   | 3798(2)    | 7998(4)    | 16.5(8)        |
| C21  | 5034(5)   | 2712(2)    | 7393(5)    | 25.7(9)        |
| C22  | 4024(6)   | 2497(3)    | 8301(5)    | 37.6(11)       |
| C30  | 5009(4)   | 4874(2)    | 9724(4)    | 19.2(8)        |
| C31  | 3446(7)   | 5588(3)    | 10641(6)   | 42.8(14)       |
| C32  | 2770(9)   | 6230(3)    | 10337(7)   | 59.4(19)       |
| Cl1A | 895.3(17) | 7500.3(6)  | 3001.3(14) | 44.9(3)        |
| O1A  | 2530(3)   | 6132.4(14) | 3590(3)    | 21.3(6)        |
| O2A  | -2710(3)  | 6155.5(19) | 3733(4)    | 43.6(10)       |
| O3A  | 3653(3)   | 6621.7(14) | 6915(3)    | 22.3(6)        |
| O4A  | 5677(3)   | 5941.5(14) | 7260(3)    | 19.8(6)        |
| O5A  | 5522(3)   | 4414.0(15) | 5158(3)    | 25.1(7)        |
| O6A  | 5046(3)   | 5412.8(14) | 4337(3)    | 19.9(6)        |
| N1A  | 3325(3)   | 5630.3(16) | 6155(3)    | 16.9(7)        |
| N2A  | 3928(3)   | 5034.0(16) | 5946(3)    | 15.1(6)        |
| C1A  | 1755(4)   | 5768.2(18) | 5546(4)    | 18.0(8)        |
| C2A  | 1434(4)   | 6014.3(19) | 4289(4)    | 17.9(8)        |
| C3A  | -84(4)    | 6141(2)    | 3683(4)    | 21.8(8)        |
| C4A  | -1251(5)  | 6018(2)    | 4364(5)    | 26.3(10)       |
| C5A  | -932(5)   | 5771(2)    | 5616(5)    | 27.8(10)       |
| C6A  | 578(5)    | 5648(2)    | 6197(4)    | 21.0(8)        |
| C7A  | -464(5)   | 6356(2)    | 2304(5)    | 26.1(9)        |
| C8A  | -94(5)    | 6957(2)    | 1888(5)    | 28.0(9)        |
| C9A  | -489(5)   | 7143(3)    | 605(5)     | 38.1(10)       |
| C10A | -1250(7)  | 6726(3)    | -298(6)    | 51.5(13)       |
| C11A | -1610(7)  | 6126(4)    | 75(6)      | 60.4(16)       |
| C12A | -1225(7)  | 5941(3)    | 1371(5)    | 48.2(13)       |
| C20A | 4340(4)   | 6068(2)    | 6827(4)    | 16.4(7)        |
| C21A | 4642(5)   | 7132(2)    | 7605(5)    | 27.3(10)       |
| C22A | 5608(6)   | 7429(3)    | 6750(6)    | 38.9(12)       |
| C30A | 4854(4)   | 4983(2)    | 5084(4)    | 17.6(8)        |

**Table 2 Fractional Atomic Coordinates ( $\times 10^4$ ) and Equivalent Isotropic Displacement Parameters ( $\text{\AA}^2 \times 10^3$ ) for 5k.  $U_{\text{eq}}$  is defined as 1/3 of the trace of the orthogonalised  $U_{ij}$  tensor.**

| Atom | $x$     | $y$     | $z$     | $U(\text{eq})$ |
|------|---------|---------|---------|----------------|
| C31A | 6361(6) | 4251(3) | 4131(5) | 38.7(12)       |
| C32A | 7483(7) | 3749(3) | 4636(6) | 50.8(16)       |

**Table 3 Anisotropic Displacement Parameters ( $\text{\AA}^2 \times 10^3$ ) for 5k. The Anisotropic displacement factor exponent takes the form:  $-2\pi^2[h^2a^2U_{11}+2hka*b*U_{12}+\dots]$ .**

| Atom | $U_{11}$ | $U_{22}$ | $U_{33}$ | $U_{23}$ | $U_{13}$ | $U_{12}$ |
|------|----------|----------|----------|----------|----------|----------|
| Cl1  | 43.5(6)  | 22.9(5)  | 28.0(6)  | -3.2(4)  | -8.8(4)  | -9.5(4)  |
| O1   | 14.2(13) | 32.0(17) | 20.2(14) | 9.3(12)  | 4.2(10)  | 5.3(12)  |
| O2   | 10.8(12) | 28.8(16) | 31.8(17) | 9.6(13)  | 3.5(11)  | 0.2(11)  |
| O3   | 15.3(13) | 20.0(15) | 26.7(16) | -3.9(12) | 1.6(11)  | -1.6(11) |
| O4   | 14.4(13) | 23.2(15) | 18.1(14) | 4.2(11)  | 1.1(10)  | -0.7(11) |
| O5   | 33.7(17) | 27.4(17) | 32.3(17) | 8.0(14)  | 18.8(14) | 12.8(13) |
| O6   | 17.7(14) | 27.9(16) | 23.7(15) | 7.4(13)  | 5.6(11)  | 2.5(12)  |
| N1   | 16.3(15) | 19.8(17) | 14.4(16) | 0.6(13)  | 0.4(12)  | 1.1(13)  |
| N2   | 17.2(15) | 17.0(17) | 18.7(17) | 3.5(13)  | 3.4(12)  | 1.2(12)  |
| C1   | 11.8(17) | 16.6(18) | 19.2(19) | -2.9(15) | 0.2(14)  | -1.1(14) |
| C2   | 13.9(17) | 16.4(19) | 18.2(19) | -4.2(15) | 4.3(14)  | -1.0(14) |
| C3   | 17.4(18) | 12.0(18) | 17.0(19) | -1.4(14) | 0.0(14)  | -0.5(14) |
| C4   | 11.8(17) | 16.3(19) | 24(2)    | -3.6(16) | 2.9(14)  | -0.7(14) |
| C5   | 18.2(19) | 23(2)    | 22(2)    | -0.9(16) | 9.3(15)  | -3.0(15) |
| C6   | 20.3(19) | 21(2)    | 13.3(18) | 1.9(16)  | 1.9(14)  | -2.2(15) |
| C7   | 11.9(16) | 17.0(19) | 18.6(19) | 1.5(15)  | 3.1(14)  | 2.8(14)  |
| C8   | 20.1(19) | 19(2)    | 26(2)    | -0.1(17) | 2.3(16)  | 1.4(15)  |
| C9   | 16.9(19) | 45(3)    | 18(2)    | 0.3(19)  | -3.5(15) | 1.4(18)  |
| C10  | 20.0(19) | 44(3)    | 22(2)    | 16(2)    | 3.9(16)  | 7.1(18)  |
| C11  | 21(2)    | 30(2)    | 33(2)    | 12(2)    | 12.2(17) | 4.4(18)  |
| C12  | 15.1(17) | 23(2)    | 24(2)    | 0.8(17)  | 6.7(15)  | 0.9(15)  |
| C20  | 14.1(17) | 23(2)    | 11.5(17) | 5.2(15)  | 1.7(13)  | -0.7(14) |
| C21  | 19.5(19) | 21(2)    | 35(3)    | -8.2(18) | 2.1(17)  | -1.4(16) |
| C22  | 37(3)    | 32(3)    | 47(3)    | -3(2)    | 14(2)    | -10(2)   |
| C30  | 15.3(17) | 22(2)    | 20(2)    | 1.8(16)  | 3.1(15)  | 0.2(15)  |
| C31  | 50(3)    | 46(3)    | 42(3)    | 10(3)    | 32(3)    | 21(3)    |
| C32  | 78(5)    | 54(4)    | 56(4)    | 6(3)     | 37(4)    | 28(3)    |
| Cl1A | 63.3(8)  | 19.6(5)  | 64.5(9)  | -4.0(6)  | 44.0(7)  | -7.0(5)  |
| O1A  | 13.2(12) | 27.9(16) | 22.2(14) | 8.0(12)  | 2.2(11)  | 3.5(11)  |
| O2A  | 10.5(13) | 55(2)    | 63(2)    | 40(2)    | 0.2(14)  | -1.9(14) |
| O3A  | 17.9(13) | 22.0(15) | 25.5(16) | -5.1(12) | 0.6(11)  | -3.2(11) |

**Table 3 Anisotropic Displacement Parameters ( $\text{\AA}^2 \times 10^3$ ) for 5k. The Anisotropic displacement factor exponent takes the form:  $-2\pi^2[h^2a^{*2}U_{11}+2hka^*b^*U_{12}+\dots]$ .**

| Atom | $U_{11}$ | $U_{22}$ | $U_{33}$ | $U_{23}$ | $U_{13}$  | $U_{12}$ |
|------|----------|----------|----------|----------|-----------|----------|
| O4A  | 16.4(13) | 23.6(15) | 17.1(14) | 3.4(12)  | -2.0(10)  | -3.5(11) |
| O5A  | 28.2(15) | 24.5(16) | 25.5(15) | 5.4(13)  | 12.4(12)  | 9.3(12)  |
| O6A  | 13.8(13) | 23.3(15) | 22.5(15) | 5.8(12)  | 3.7(10)   | 1.6(11)  |
| N1A  | 15.8(15) | 16.8(16) | 17.2(16) | -2.0(13) | 1.2(12)   | 1.5(12)  |
| N2A  | 14.9(14) | 14.1(16) | 16.2(16) | 3.0(13)  | 2.4(12)   | 1.9(12)  |
| C1A  | 14.9(18) | 15.4(19) | 22(2)    | -1.5(15) | 0.1(14)   | 0.3(14)  |
| C2A  | 16.2(18) | 13.9(18) | 22.4(19) | 0.2(16)  | 1.4(15)   | -3.2(13) |
| C3A  | 16.8(18) | 18(2)    | 29(2)    | 8.1(17)  | -1.7(16)  | -2.7(15) |
| C4A  | 15.4(19) | 23(2)    | 38(2)    | 10(2)    | 1.7(17)   | -2.6(15) |
| C5A  | 17(2)    | 27(2)    | 41(3)    | 8(2)     | 9.9(18)   | -3.8(16) |
| C6A  | 20.4(19) | 21(2)    | 21(2)    | 3.9(17)  | 2.6(15)   | -1.2(16) |
| C7A  | 13.6(16) | 27.6(18) | 33.7(19) | 12.4(15) | -3.4(14)  | -2.2(14) |
| C8A  | 20.7(18) | 26.2(17) | 40.6(18) | 10.0(16) | 14.8(15)  | 4.7(14)  |
| C9A  | 29(2)    | 41(2)    | 48(2)    | 23.7(16) | 15.9(16)  | 8.8(17)  |
| C10A | 38(2)    | 67(3)    | 45(2)    | 27.3(19) | -1.4(19)  | -5(2)    |
| C11A | 57(3)    | 72(3)    | 42(2)    | 18(2)    | -15(2)    | -27(2)   |
| C12A | 48(3)    | 47(2)    | 41(2)    | 14.7(18) | -12.4(19) | -26(2)   |
| C20A | 15.8(17) | 21.7(19) | 12.0(17) | 4.8(15)  | 3.5(13)   | -1.2(14) |
| C21A | 25(2)    | 22(2)    | 32(2)    | -9.0(19) | -0.7(17)  | -6.0(17) |
| C22A | 36(3)    | 27(3)    | 52(3)    | 3(2)     | 5(2)      | -11(2)   |
| C30A | 12.7(17) | 20.8(19) | 16.8(19) | 0.2(16)  | -2.8(14)  | 1.2(14)  |
| C31A | 50(3)    | 40(3)    | 32(3)    | 8(2)     | 24(2)     | 21(2)    |
| C32A | 42(3)    | 66(4)    | 45(3)    | -5(3)    | 11(2)     | 26(3)    |

**Table 4 Bond Lengths for 5k.**

| Atom | Atom | Length/ $\text{\AA}$ | Atom | Atom | Length/ $\text{\AA}$ |
|------|------|----------------------|------|------|----------------------|
| Cl1  | C8   | 1.750(4)             | Cl1A | C8A  | 1.740(5)             |
| O1   | C2   | 1.349(5)             | O1A  | C2A  | 1.356(5)             |
| O2   | C4   | 1.365(5)             | O2A  | C4A  | 1.365(5)             |
| O3   | C20  | 1.326(5)             | O3A  | C20A | 1.321(5)             |
| O3   | C21  | 1.460(5)             | O3A  | C21A | 1.479(5)             |
| O4   | C20  | 1.212(5)             | O4A  | C20A | 1.215(5)             |
| O5   | C30  | 1.318(5)             | O5A  | C30A | 1.326(5)             |
| O5   | C31  | 1.459(5)             | O5A  | C31A | 1.469(5)             |
| O6   | C30  | 1.223(5)             | O6A  | C30A | 1.228(5)             |
| N1   | N2   | 1.389(5)             | N1A  | N2A  | 1.392(5)             |
| N1   | C1   | 1.439(5)             | N1A  | C1A  | 1.445(5)             |

**Table 4 Bond Lengths for 5k.**

| Atom | Atom | Length/Å | Atom | Atom | Length/Å |
|------|------|----------|------|------|----------|
| N1   | C20  | 1.381(5) | N1A  | C20A | 1.378(5) |
| N2   | C30  | 1.348(5) | N2A  | C30A | 1.345(5) |
| C1   | C2   | 1.396(6) | C1A  | C2A  | 1.394(6) |
| C1   | C6   | 1.391(5) | C1A  | C6A  | 1.384(6) |
| C2   | C3   | 1.401(5) | C2A  | C3A  | 1.398(5) |
| C3   | C4   | 1.400(5) | C3A  | C4A  | 1.397(6) |
| C3   | C7   | 1.493(5) | C3A  | C7A  | 1.493(6) |
| C4   | C5   | 1.385(6) | C4A  | C5A  | 1.391(6) |
| C5   | C6   | 1.385(6) | C5A  | C6A  | 1.384(6) |
| C7   | C8   | 1.393(6) | C7A  | C8A  | 1.393(6) |
| C7   | C12  | 1.400(6) | C7A  | C12A | 1.382(7) |
| C8   | C9   | 1.386(6) | C8A  | C9A  | 1.381(7) |
| C9   | C10  | 1.383(7) | C9A  | C10A | 1.366(9) |
| C10  | C11  | 1.387(7) | C10A | C11A | 1.372(9) |
| C11  | C12  | 1.382(6) | C11A | C12A | 1.392(8) |
| C21  | C22  | 1.504(7) | C21A | C22A | 1.497(7) |
| C31  | C32  | 1.480(8) | C31A | C32A | 1.474(7) |

**Table 5 Bond Angles for 5k.**

| Atom | Atom | Atom | Angle/°  | Atom | Atom | Atom | Angle/°  |
|------|------|------|----------|------|------|------|----------|
| C20  | O3   | C21  | 116.0(3) | C20A | O3A  | C21A | 115.4(3) |
| C30  | O5   | C31  | 117.1(4) | C30A | O5A  | C31A | 116.9(3) |
| N2   | N1   | C1   | 118.2(3) | N2A  | N1A  | C1A  | 118.5(3) |
| C20  | N1   | N2   | 116.5(3) | C20A | N1A  | N2A  | 116.3(3) |
| C20  | N1   | C1   | 124.7(3) | C20A | N1A  | C1A  | 124.9(3) |
| C30  | N2   | N1   | 117.8(3) | C30A | N2A  | N1A  | 118.9(3) |
| C2   | C1   | N1   | 119.9(3) | C2A  | C1A  | N1A  | 119.5(4) |
| C6   | C1   | N1   | 119.7(3) | C6A  | C1A  | N1A  | 120.2(4) |
| C6   | C1   | C2   | 120.4(3) | C6A  | C1A  | C2A  | 120.2(4) |
| O1   | C2   | C1   | 123.0(3) | O1A  | C2A  | C1A  | 123.2(3) |
| O1   | C2   | C3   | 117.5(4) | O1A  | C2A  | C3A  | 116.9(4) |
| C1   | C2   | C3   | 119.4(4) | C1A  | C2A  | C3A  | 120.0(4) |
| C2   | C3   | C7   | 120.4(3) | C2A  | C3A  | C7A  | 120.8(4) |
| C4   | C3   | C2   | 119.0(4) | C4A  | C3A  | C2A  | 118.7(4) |
| C4   | C3   | C7   | 120.6(3) | C4A  | C3A  | C7A  | 120.4(4) |
| O2   | C4   | C3   | 116.1(4) | O2A  | C4A  | C3A  | 116.3(4) |
| O2   | C4   | C5   | 122.5(4) | O2A  | C4A  | C5A  | 122.3(4) |
| C5   | C4   | C3   | 121.3(3) | C5A  | C4A  | C3A  | 121.4(4) |

**Table 5 Bond Angles for 5k.**

| Atom | Atom | Atom | Angle/°  | Atom | Atom | Atom | Angle/°  |
|------|------|------|----------|------|------|------|----------|
| C6   | C5   | C4   | 119.2(4) | C6A  | C5A  | C4A  | 119.0(4) |
| C5   | C6   | C1   | 120.6(4) | C1A  | C6A  | C5A  | 120.7(4) |
| C8   | C7   | C3   | 121.5(4) | C8A  | C7A  | C3A  | 123.8(4) |
| C8   | C7   | C12  | 117.4(4) | C12A | C7A  | C3A  | 119.1(4) |
| C12  | C7   | C3   | 121.1(4) | C12A | C7A  | C8A  | 117.1(4) |
| C7   | C8   | Cl1  | 119.0(3) | C7A  | C8A  | Cl1A | 119.8(4) |
| C9   | C8   | Cl1  | 118.8(3) | C9A  | C8A  | Cl1A | 118.1(4) |
| C9   | C8   | C7   | 122.1(4) | C9A  | C8A  | C7A  | 122.1(5) |
| C10  | C9   | C8   | 118.9(4) | C10A | C9A  | C8A  | 119.7(5) |
| C9   | C10  | C11  | 120.6(4) | C9A  | C10A | C11A | 119.7(5) |
| C12  | C11  | C10  | 119.8(4) | C10A | C11A | C12A | 120.5(6) |
| C11  | C12  | C7   | 121.2(4) | C7A  | C12A | C11A | 120.8(5) |
| O3   | C20  | N1   | 110.5(3) | O3A  | C20A | N1A  | 110.7(3) |
| O4   | C20  | O3   | 126.5(4) | O4A  | C20A | O3A  | 126.6(4) |
| O4   | C20  | N1   | 123.0(4) | O4A  | C20A | N1A  | 122.7(4) |
| O3   | C21  | C22  | 111.4(4) | O3A  | C21A | C22A | 111.1(4) |
| O5   | C30  | N2   | 110.4(3) | O5A  | C30A | N2A  | 111.0(3) |
| O6   | C30  | O5   | 125.1(4) | O6A  | C30A | O5A  | 125.2(4) |
| O6   | C30  | N2   | 124.5(4) | O6A  | C30A | N2A  | 123.8(4) |
| O5   | C31  | C32  | 107.1(4) | O5A  | C31A | C32A | 107.8(4) |

**Table 6 Hydrogen Bonds for 5k.**

| D   | H    | A                | d(D-H)/Å | d(H-A)/Å | d(D-A)/Å | D-H-A/° |
|-----|------|------------------|----------|----------|----------|---------|
| O1  | H1   | O6               | 0.84     | 1.91     | 2.729(4) | 165.1   |
| O2  | H2   | O6 <sup>1</sup>  | 0.84     | 1.95     | 2.756(4) | 159.4   |
| O1A | H1A  | O6A              | 0.84     | 1.85     | 2.681(4) | 170.7   |
| O2A | H2AA | O6A <sup>2</sup> | 0.84     | 1.89     | 2.703(4) | 161.9   |

<sup>1</sup>1+X,+Y,+Z; <sup>2</sup>-1+X,+Y,+Z

**Table 7 Torsion Angles for 5k.**

| A   | B  | C   | D   | Angle/°   | A    | B   | C    | D    | Angle/°   |
|-----|----|-----|-----|-----------|------|-----|------|------|-----------|
| Cl1 | C8 | C9  | C10 | 176.8(3)  | Cl1A | C8A | C9A  | C10A | 179.2(4)  |
| O1  | C2 | C3  | C4  | 179.2(3)  | O1A  | C2A | C3A  | C4A  | 179.2(4)  |
| O1  | C2 | C3  | C7  | -1.3(6)   | O1A  | C2A | C3A  | C7A  | 3.8(6)    |
| O2  | C4 | C5  | C6  | 177.6(4)  | O2A  | C4A | C5A  | C6A  | -179.6(5) |
| N1  | N2 | C30 | O5  | -167.5(3) | N1A  | N2A | C30A | O5A  | 169.7(3)  |
| N1  | N2 | C30 | O6  | 13.4(6)   | N1A  | N2A | C30A | O6A  | -10.1(6)  |
| N1  | C1 | C2  | O1  | 0.0(6)    | N1A  | C1A | C2A  | O1A  | 0.2(6)    |

**Table 7 Torsion Angles for 5k.**

| A   | B   | C   | D   | Angle/°   | A    | B    | C    | D    | Angle/°   |
|-----|-----|-----|-----|-----------|------|------|------|------|-----------|
| N1  | C1  | C2  | C3  | -179.7(3) | N1A  | C1A  | C2A  | C3A  | 179.1(4)  |
| N1  | C1  | C6  | C5  | -179.5(4) | N1A  | C1A  | C6A  | C5A  | -179.3(4) |
| N2  | N1  | C1  | C2  | 89.2(4)   | N2A  | N1A  | C1A  | C2A  | -86.9(4)  |
| N2  | N1  | C1  | C6  | -90.2(4)  | N2A  | N1A  | C1A  | C6A  | 92.1(5)   |
| N2  | N1  | C20 | O3  | -172.7(3) | N2A  | N1A  | C20A | O3A  | 177.3(3)  |
| N2  | N1  | C20 | O4  | 7.3(5)    | N2A  | N1A  | C20A | O4A  | -2.5(5)   |
| C1  | N1  | N2  | C30 | -103.4(4) | C1A  | N1A  | N2A  | C30A | 101.5(4)  |
| C1  | N1  | C20 | O3  | -2.4(5)   | C1A  | N1A  | C20A | O3A  | 4.2(5)    |
| C1  | N1  | C20 | O4  | 177.6(4)  | C1A  | N1A  | C20A | O4A  | -175.5(4) |
| C1  | C2  | C3  | C4  | -1.0(6)   | C1A  | C2A  | C3A  | C4A  | 0.3(6)    |
| C1  | C2  | C3  | C7  | 178.4(4)  | C1A  | C2A  | C3A  | C7A  | -175.2(4) |
| C2  | C1  | C6  | C5  | 1.2(6)    | C2A  | C1A  | C6A  | C5A  | -0.3(6)   |
| C2  | C3  | C4  | O2  | -176.9(3) | C2A  | C3A  | C4A  | O2A  | 179.4(4)  |
| C2  | C3  | C4  | C5  | 1.6(6)    | C2A  | C3A  | C4A  | C5A  | -0.4(7)   |
| C2  | C3  | C7  | C8  | -114.3(4) | C2A  | C3A  | C7A  | C8A  | -70.6(6)  |
| C2  | C3  | C7  | C12 | 65.9(5)   | C2A  | C3A  | C7A  | C12A | 109.3(5)  |
| C3  | C4  | C5  | C6  | -0.8(6)   | C3A  | C4A  | C5A  | C6A  | 0.2(7)    |
| C3  | C7  | C8  | C11 | 4.4(5)    | C3A  | C7A  | C8A  | C11A | 1.1(6)    |
| C3  | C7  | C8  | C9  | -176.5(4) | C3A  | C7A  | C8A  | C9A  | -178.9(4) |
| C3  | C7  | C12 | C11 | 178.1(4)  | C3A  | C7A  | C12A | C11A | 179.5(6)  |
| C4  | C3  | C7  | C8  | 65.2(5)   | C4A  | C3A  | C7A  | C8A  | 114.0(5)  |
| C4  | C3  | C7  | C12 | -114.7(4) | C4A  | C3A  | C7A  | C12A | -66.1(7)  |
| C4  | C5  | C6  | C1  | -0.6(6)   | C4A  | C5A  | C6A  | C1A  | 0.1(7)    |
| C6  | C1  | C2  | O1  | 179.4(4)  | C6A  | C1A  | C2A  | O1A  | -178.8(4) |
| C6  | C1  | C2  | C3  | -0.3(6)   | C6A  | C1A  | C2A  | C3A  | 0.1(6)    |
| C7  | C3  | C4  | O2  | 3.7(6)    | C7A  | C3A  | C4A  | O2A  | -5.1(7)   |
| C7  | C3  | C4  | C5  | -177.8(4) | C7A  | C3A  | C4A  | C5A  | 175.1(4)  |
| C7  | C8  | C9  | C10 | -2.3(6)   | C7A  | C8A  | C9A  | C10A | -0.9(7)   |
| C8  | C7  | C12 | C11 | -1.7(6)   | C8A  | C7A  | C12A | C11A | -0.6(9)   |
| C8  | C9  | C10 | C11 | -0.5(7)   | C8A  | C9A  | C10A | C11A | -0.2(9)   |
| C9  | C10 | C11 | C12 | 2.0(7)    | C9A  | C10A | C11A | C12A | 0.9(10)   |
| C10 | C11 | C12 | C7  | -0.9(6)   | C10A | C11A | C12A | C7A  | -0.4(11)  |
| C12 | C7  | C8  | C11 | -175.8(3) | C12A | C7A  | C8A  | C11A | -178.8(4) |
| C12 | C7  | C8  | C9  | 3.3(6)    | C12A | C7A  | C8A  | C9A  | 1.3(7)    |
| C20 | O3  | C21 | C22 | -74.6(5)  | C20A | O3A  | C21A | C22A | 78.9(5)   |
| C20 | N1  | N2  | C30 | 67.6(4)   | C20A | N1A  | N2A  | C30A | -72.0(4)  |
| C20 | N1  | C1  | C2  | -81.0(5)  | C20A | N1A  | C1A  | C2A  | 86.0(5)   |
| C20 | N1  | C1  | C6  | 99.6(5)   | C20A | N1A  | C1A  | C6A  | -95.0(5)  |

**Table 7 Torsion Angles for 5k.**

| A     | B      | C | D | Angle/°   | A        | B         | C | D | Angle/°   |
|-------|--------|---|---|-----------|----------|-----------|---|---|-----------|
| C21O3 | C20O4  |   |   | -3.0(6)   | C21A O3A | C20A O4A  |   |   | 0.5(6)    |
| C21O3 | C20N1  |   |   | 177.0(3)  | C21A O3A | C20A N1A  |   |   | -179.2(3) |
| C30O5 | C31C32 |   |   | -178.0(5) | C30A O5A | C31A C32A |   |   | 157.9(5)  |
| C31O5 | C30O6  |   |   | 6.2(7)    | C31A O5A | C30A O6A  |   |   | -10.2(6)  |
| C31O5 | C30N2  |   |   | -172.8(4) | C31A O5A | C30A N2A  |   |   | 170.0(4)  |

**Table 8 Hydrogen Atom Coordinates ( $\text{\AA}\times 10^4$ ) and Isotropic Displacement Parameters ( $\text{\AA}^2\times 10^3$ ) for 5k.**

| Atom | <i>x</i> | <i>y</i> | <i>z</i> | U(eq) |
|------|----------|----------|----------|-------|
| H1   | 6526.38  | 3867.48  | 10811.66 | 33    |
| H2   | 13169.91 | 3844.84  | 10510.98 | 36    |
| H2A  | 6171.57  | 5176.32  | 8449.67  | 21    |
| H5   | 11509.07 | 4162.45  | 8558.28  | 24    |
| H6   | 8956.4   | 4413.01  | 7670.08  | 22    |
| H9   | 12345.56 | 3699.76  | 15208.95 | 33    |
| H10  | 11538.93 | 2666.96  | 15595.03 | 34    |
| H11  | 9931.11  | 2100.67  | 13953.06 | 33    |
| H12  | 9235.32  | 2541.57  | 11891.31 | 25    |
| H21A | 5649.65  | 2346.1   | 7189.16  | 31    |
| H21B | 4384.52  | 2863.02  | 6572.35  | 31    |
| H22A | 3464.97  | 2110.83  | 7954.08  | 56    |
| H22B | 3291.55  | 2836.27  | 8387.22  | 56    |
| H22C | 4659.36  | 2402.94  | 9153.38  | 56    |
| H31A | 4115.03  | 5586.62  | 11514.13 | 51    |
| H31B | 2625.87  | 5266.3   | 10626.25 | 51    |
| H32A | 2061.43  | 6217.88  | 9495.19  | 89    |
| H32B | 3589.86  | 6538.83  | 10302.77 | 89    |
| H32C | 2212.42  | 6357.79  | 11010.7  | 89    |
| H1A  | 3327.31  | 5925.77  | 3906     | 32    |
| H2AA | -3339.3  | 5956.48  | 4084.14  | 65    |
| H2AB | 3705.83  | 4695.67  | 6371.22  | 18    |
| H5A  | -1738.02 | 5688.91  | 6066.8   | 33    |
| H6A  | 807.47   | 5478.24  | 7051.15  | 25    |
| H9A  | -233.42  | 7558.7   | 352.64   | 46    |
| H10A | -1528.98 | 6851.38  | -1181.72 | 62    |
| H11A | -2126.8  | 5833.88  | -554.89  | 72    |
| H12A | -1487.64 | 5525.21  | 1616.05  | 58    |
| H21C | 5314.47  | 6950.64  | 8385.1   | 33    |



**Table 8 Hydrogen Atom Coordinates ( $\text{\AA}\times 10^4$ ) and Isotropic Displacement Parameters ( $\text{\AA}^2\times 10^3$ ) for 5k.**

| <b>Atom</b> | <b><i>x</i></b> | <b><i>y</i></b> | <b><i>z</i></b> | <b>U(eq)</b> |
|-------------|-----------------|-----------------|-----------------|--------------|
| H21D        | 3992.61         | 7465.39         | 7893.57         | 33           |
| H22D        | 4943.86         | 7603.69         | 5972.72         | 58           |
| H22E        | 6284.99         | 7103.04         | 6496.26         | 58           |
| H22F        | 6229.56         | 7772.8          | 7221.18         | 58           |
| H31C        | 6894.79         | 4633.79         | 3886.51         | 46           |
| H31D        | 5638.92         | 4095.51         | 3352.92         | 46           |
| H32D        | 7970.37         | 3594.42         | 3936.86         | 76           |
| H32E        | 6956.81         | 3393.23         | 4970.3          | 76           |
| H32F        | 8266.68         | 3924.39         | 5336.85         | 76           |

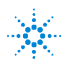

## Agilent Technologies

File of data: D:\ChemStation\2\Data\2023-10-16S 2023-10-16 09-06-31\ZHH-6-1-RAC.D  
 Sample name: ZHH-6-1-RAC  
 Remarks: ZHH-6-1-RAC  
 Acq. instrument: LCI260  
 Injection date: 2023/10/16 18:13:18  
 Acq. Method: OD-20-60.M  
 Analysis Method: OD-20-60.M  
 Last changed: 2024/4/19 15:14:44

Location: P2-D1  
 Inj: 1 of 1  
 Inj Volume: 5.000  
 Acq. Operator: system

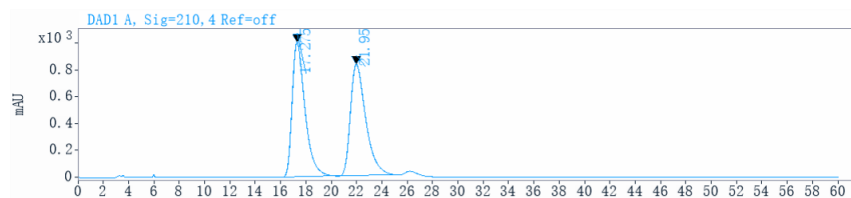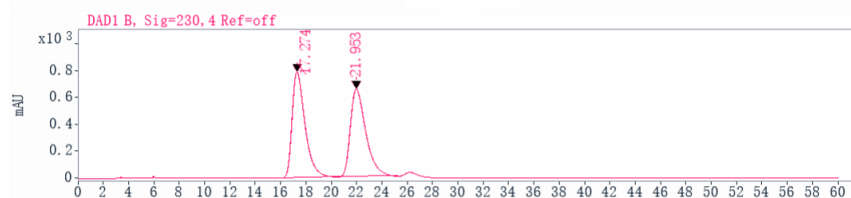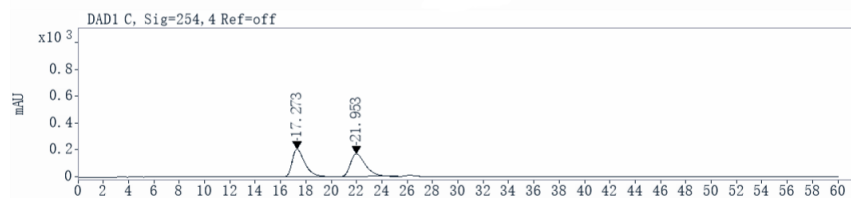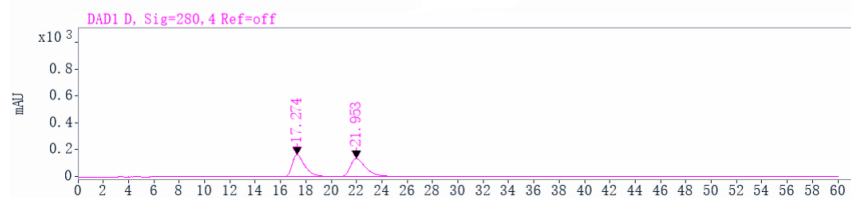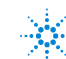

## Agilent Technologies

Signal: DAD1 A, Sig=210,4 Ref=off

| RetTime [min] | Type | Width [min] | Area [mAu*s] | Height [mAu\U] | Area% Name |
|---------------|------|-------------|--------------|----------------|------------|
| 17.275        | BB   | 1.0384      | 71097.0859   | 1006.1107      | 50.1827    |
| 21.950        | BB   | 1.2683      | 70579.2734   | 833.1794       | 49.8173    |
| total         |      |             | 141676.3594  |                |            |

Signal: DAD1 B, Sig=230,4 Ref=off

| RetTime [min] | Type | Width [min] | Area [mAu*s] | Height [mAu\U] | Area% Name |
|---------------|------|-------------|--------------|----------------|------------|
| 17.274        | BB   | 1.0756      | 56263.6680   | 791.2463       | 50.1212    |
| 21.953        | BB   | 1.2847      | 55991.6602   | 656.7013       | 49.8788    |
| total         |      |             | 112255.3281  |                |            |

Signal: DAD1 C, Sig=254,4 Ref=off

| RetTime [min] | Type | Width [min] | Area [mAu*s] | Height [mAu\U] | Area% Name |
|---------------|------|-------------|--------------|----------------|------------|
| 17.273        | BB   | 1.0490      | 14531.9512   | 208.0298       | 50.3023    |
| 21.953        | BB   | 1.2548      | 14357.2930   | 171.1317       | 49.6977    |
| total         |      |             | 28889.2441   |                |            |

Signal: DAD1 D, Sig=280,4 Ref=off

| RetTime [min] | Type | Width [min] | Area [mAu*s] | Height [mAu\U] | Area% Name |
|---------------|------|-------------|--------------|----------------|------------|
| 17.274        | BB   | 1.0525      | 11446.4023   | 163.9557       | 50.1609    |
| 21.953        | BB   | 1.2592      | 11372.9775   | 134.9555       | 49.8391    |
| total         |      |             | 22819.3799   |                |            |

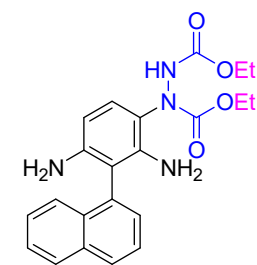

3a-rac

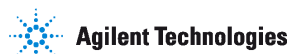

File of data: D:\ChemStation\2\Data\2023-11-25\_2023-11-02\_16-56-46\zhh-6-27-2.D  
 Sample name: zhh-6-27-2  
 Remarks: zhh-6-27-2  
 Acq. instrument: LC1260  
 Injection date: 2023/11/2 17:09:41  
 Acq. Method: OD-20-30.M  
 Analysis Method: OD-20-30.M  
 Last changed: 2024/4/19 15:16:39

Location: P2-D4  
 Inj: 1 of 1  
 Inj Volume: 5.000  
 Acq. Operator: system

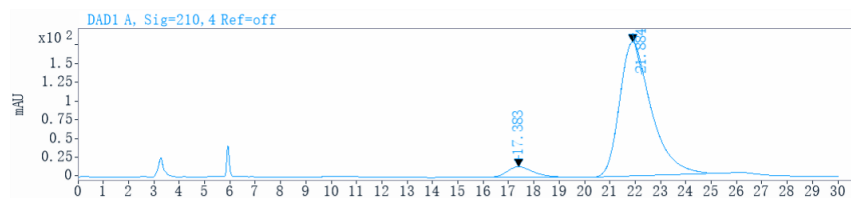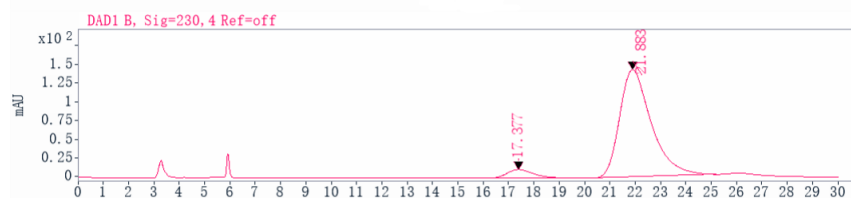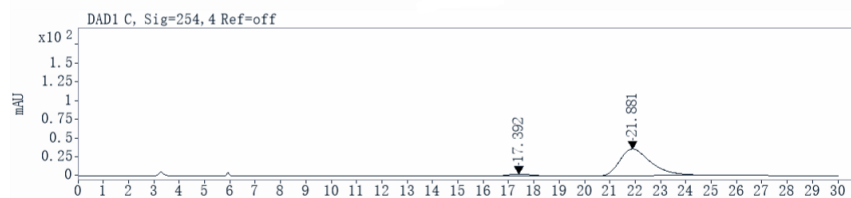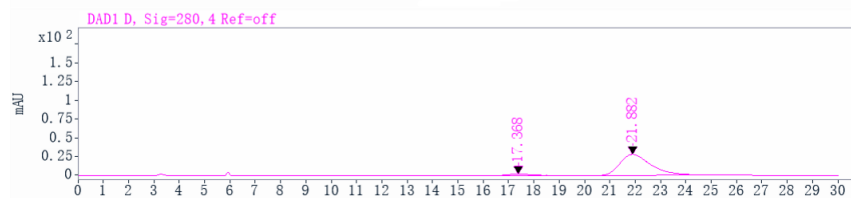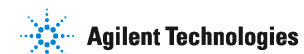

Signal: DAD1 A, Sig=210,4 Ref=off

| RetTime [min] | Type | Width [min] | Area [mAu*s] | Height [mAu\U] | Area% Name |
|---------------|------|-------------|--------------|----------------|------------|
| 17.383        | BB   | 0.8664      | 1020.8027    | 14.1367        | 6.1295     |
| 21.884        | BB   | 1.2553      | 15633.1240   | 178.9350       | 93.8705    |
|               |      |             | total        | 16653.9267     |            |

Signal: DAD1 B, Sig=230,4 Ref=off

| RetTime [min] | Type | Width [min] | Area [mAu*s] | Height [mAu\U] | Area% Name |
|---------------|------|-------------|--------------|----------------|------------|
| 17.377        | BB   | 0.9301      | 865.6924     | 11.6339        | 6.4815     |
| 21.883        | BB   | 1.2862      | 12490.7100   | 143.4053       | 93.5185    |
|               |      |             | total        | 13356.4024     |            |

Signal: DAD1 C, Sig=254,4 Ref=off

| RetTime [min] | Type | Width [min] | Area [mAu*s] | Height [mAu\U] | Area% Name |
|---------------|------|-------------|--------------|----------------|------------|
| 17.392        | MM   | 1.1974      | 203.8153     | 2.8370         | 6.1475     |
| 21.881        | BB   | 1.2433      | 3111.5896    | 35.9664        | 93.8525    |
|               |      |             | total        | 3315.4049      |            |

Signal: DAD1 D, Sig=280,4 Ref=off

| RetTime [min] | Type | Width [min] | Area [mAu*s] | Height [mAu\U] | Area% Name |
|---------------|------|-------------|--------------|----------------|------------|
| 17.368        | MM   | 1.1522      | 158.3492     | 2.2905         | 6.0059     |
| 21.882        | BB   | 1.2466      | 2478.2173    | 28.3286        | 93.9941    |
|               |      |             | total        | 2636.5665      |            |

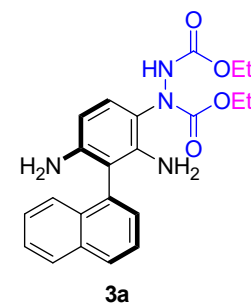

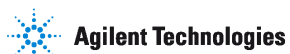

File of data: D:\ChemStation\2\Data\2023-11-14-2.S 2023-11-13 23-48-31\zhh-6-43-1.D  
 Sample name: zhh-6-43-1  
 Remarks: zhh-6-43-1  
 Acq. instrument: LCI260  
 Injection date: 2023/11/15 1:58:32  
 Acq. Method: IC-20-40.M  
 Analysis Method: IC-20-40.M  
 Last changed: 2024/4/19 15:22:03

Location: P2-D1  
 Inj: 1 of 1  
 Inj Volume: 5.000  
 Acq. Operator: system

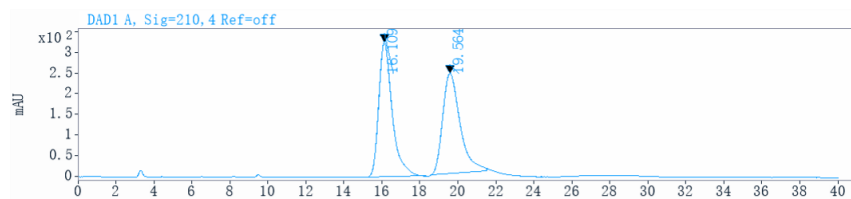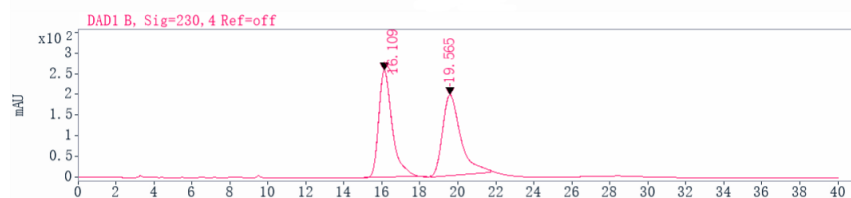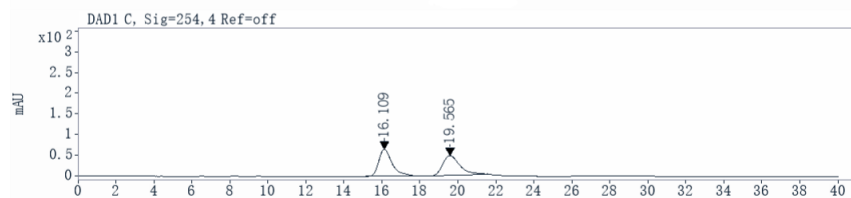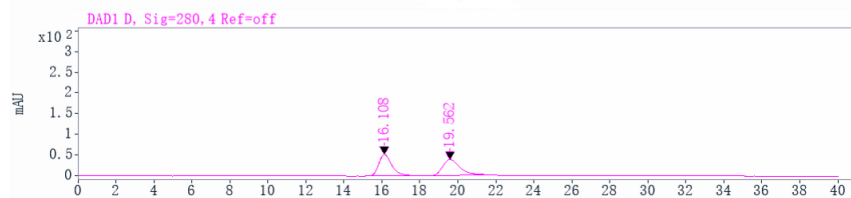

Signal: DAD1 A, Sig=210,4 Ref=off

| RetTime [min] | Type | Width [min] | Area [mAu*s] | Height [mAu\U] | Area% Name |
|---------------|------|-------------|--------------|----------------|------------|
| 16.109        | BB   | 0.7486      | 16169.5479   | 326.0485       | 50.9369    |
| 19.564        | MM   | 1.0686      | 15574.7021   | 242.9219       | 49.0631    |
|               |      |             | total        | 31744.2500     |            |

Signal: DAD1 B, Sig=230,4 Ref=off

| RetTime [min] | Type | Width [min] | Area [mAu*s] | Height [mAu\U] | Area% Name |
|---------------|------|-------------|--------------|----------------|------------|
| 16.109        | BB   | 0.7560      | 12968.2334   | 259.0559       | 49.5445    |
| 19.565        | MM   | 1.1221      | 13206.6777   | 196.1589       | 50.4555    |
|               |      |             | total        | 26174.9111     |            |

Signal: DAD1 C, Sig=254,4 Ref=off

| RetTime [min] | Type | Width [min] | Area [mAu*s] | Height [mAu\U] | Area% Name |
|---------------|------|-------------|--------------|----------------|------------|
| 16.109        | BB   | 0.7561      | 3274.5256    | 65.4082        | 50.5928    |
| 19.565        | MM   | 1.0919      | 3197.7881    | 48.8092        | 49.4072    |
|               |      |             | total        | 6472.3137      |            |

Signal: DAD1 D, Sig=280,4 Ref=off

| RetTime [min] | Type | Width [min] | Area [mAu*s] | Height [mAu\U] | Area% Name |
|---------------|------|-------------|--------------|----------------|------------|
| 16.108        | BB   | 0.7236      | 2537.4795    | 52.1547        | 49.3440    |
| 19.562        | MM   | 1.0975      | 2604.9473    | 39.5597        | 50.6560    |
|               |      |             | total        | 5142.4268      |            |

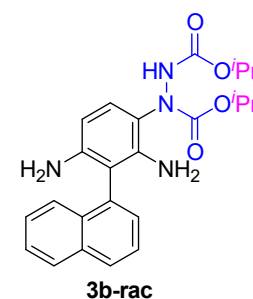



File of data: D:\ChemStation\2\Data\2023-11-18S 2023-11-18 11-05-50\zhh-6-42.D  
 Sample name: zhh-6-42  
 Remarks: zhh-6-42  
 Acq. instrument: LCT1260  
 Injection date: 2023/11/18 11:18:56  
 Acq. Method: IC-20-40.M  
 Analysis Method: IC-20-40.M  
 Last changed: 2024/4/19 15:19:17

Location: P2-D1  
 Inj: 1 of 1  
 Inj Volume: 10.000  
 Acq. Operator: system

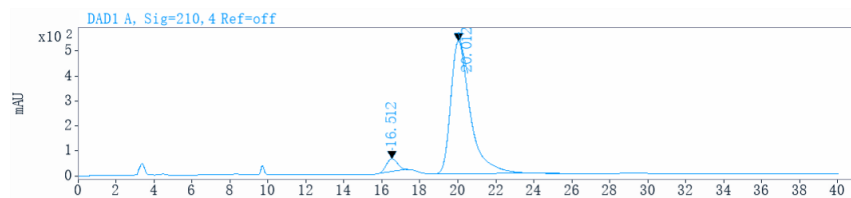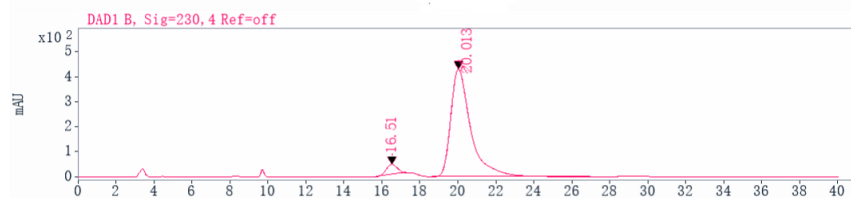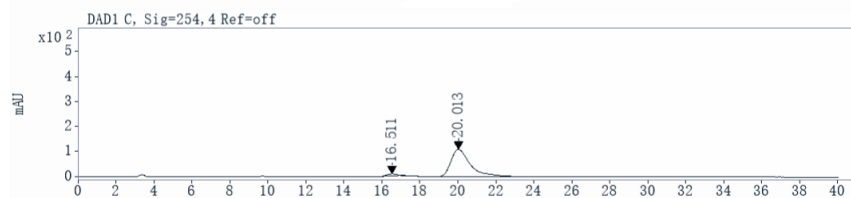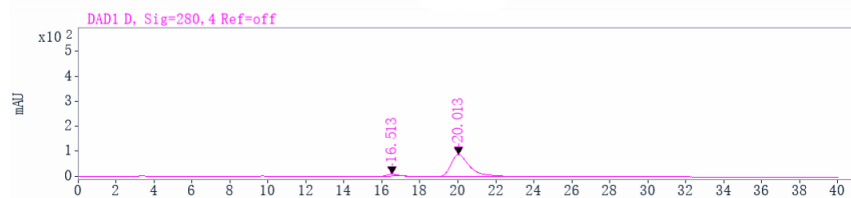

Signal: DAD1 A, Sig=210,4 Ref=off

| RetTime [min] | Type | Width [min] | Area [mAu*s] | Height [mAu\U] | Area% Name |
|---------------|------|-------------|--------------|----------------|------------|
| 16.512        | BB   | 0.6317      | 2217.5964    | 52.4071        | 5.4778     |
| 20.012        | BB   | 1.0662      | 38265.5039   | 531.3139       | 94.5222    |
|               |      |             | total        | 40483.1003     |            |

Signal: DAD1 B, Sig=230,4 Ref=off

| RetTime [min] | Type | Width [min] | Area [mAu*s] | Height [mAu\U] | Area% Name |
|---------------|------|-------------|--------------|----------------|------------|
| 16.510        | BB   | 0.6512      | 1703.9152    | 41.3087        | 5.0973     |
| 20.013        | BB   | 1.0902      | 31723.9961   | 431.2607       | 94.9027    |
|               |      |             | total        | 33427.9113     |            |

Signal: DAD1 C, Sig=254,4 Ref=off

| RetTime [min] | Type | Width [min] | Area [mAu*s] | Height [mAu\U] | Area% Name |
|---------------|------|-------------|--------------|----------------|------------|
| 16.511        | BB   | 0.6321      | 407.2042     | 10.0625        | 4.7729     |
| 20.013        | BB   | 1.0766      | 8124.3760    | 110.6577       | 95.2271    |
|               |      |             | total        | 8531.5801      |            |

Signal: DAD1 D, Sig=280,4 Ref=off

| RetTime [min] | Type | Width [min] | Area [mAu*s] | Height [mAu\U] | Area% Name |
|---------------|------|-------------|--------------|----------------|------------|
| 16.513        | MM   | 0.7053      | 362.4068     | 8.5642         | 5.4678     |
| 20.013        | BB   | 1.0553      | 6265.5884    | 88.1408        | 94.5322    |
|               |      |             | total        | 6627.9952      |            |

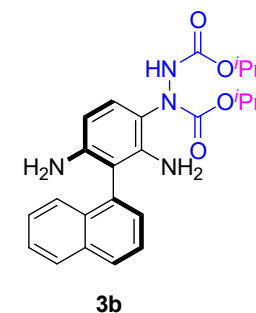

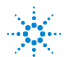

## Agilent Technologies

File of data: D:\ChemStation\2\Data\2023-11-14-2.S 2023-11-13 23-48-31\zhh-6-43-2,.D  
 Sample name: zhh-6-43-2,  
 Remarks: zhh-6-43-2,  
 Acq. instrument: LCI260  
 Injection date: 2023/11/16 2:52:48  
 Acq. Method: IC-05-60.M  
 Analysis Method: IC-05-60.M  
 Last changed: 2024/4/19 15:23:48

Location: P2-D2  
 Inj: 1 of 1  
 Inj Volume: 10.000  
 Acq. Operator: system

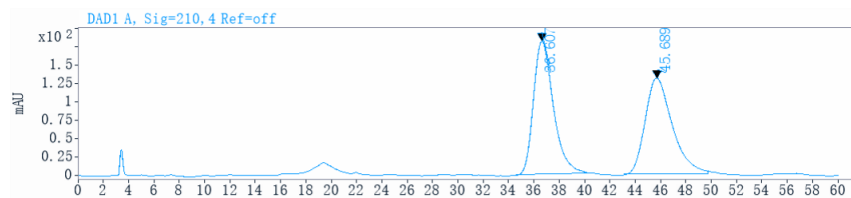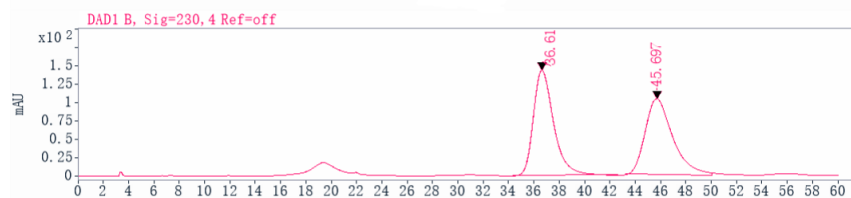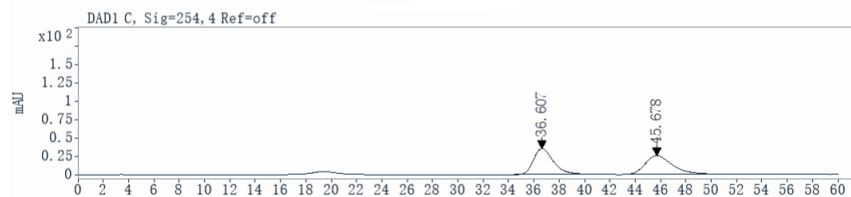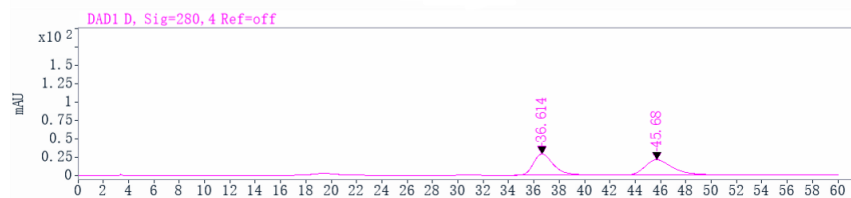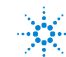

## Agilent Technologies

Signal: DAD1 A, Sig=210,4 Ref=off

| RetTime [min] | Type | Width [min] | Area [mAu*s] | Height [mAu\U] | Area% Name |
|---------------|------|-------------|--------------|----------------|------------|
| 36.607        | BB   | 1.5153      | 19891.8223   | 181.4096       | 50.5083    |
| 45.689        | MM   | 2.4916      | 19491.4258   | 130.3813       | 49.4917    |
|               |      |             | total        | 39383.2480     |            |

Signal: DAD1 B, Sig=230,4 Ref=off

| RetTime [min] | Type | Width [min] | Area [mAu*s] | Height [mAu\U] | Area% Name |
|---------------|------|-------------|--------------|----------------|------------|
| 36.610        | BB   | 1.7093      | 16097.1338   | 143.4327       | 50.5146    |
| 45.697        | MM   | 2.5462      | 15769.1514   | 103.2184       | 49.4854    |
|               |      |             | total        | 31866.2852     |            |

Signal: DAD1 C, Sig=254,4 Ref=off

| RetTime [min] | Type | Width [min] | Area [mAu*s] | Height [mAu\U] | Area% Name |
|---------------|------|-------------|--------------|----------------|------------|
| 36.607        | BB   | 1.4090      | 3931.1877    | 35.4703        | 50.1681    |
| 45.678        | BB   | 1.7994      | 3904.8423    | 25.5166        | 49.8319    |
|               |      |             | total        | 7836.0300      |            |

Signal: DAD1 D, Sig=280,4 Ref=off

| RetTime [min] | Type | Width [min] | Area [mAu*s] | Height [mAu\U] | Area% Name |
|---------------|------|-------------|--------------|----------------|------------|
| 36.614        | BB   | 1.3748      | 3154.5386    | 28.8247        | 50.0763    |
| 45.680        | BB   | 1.7800      | 3144.9287    | 20.7997        | 49.9237    |
|               |      |             | total        | 6299.4673      |            |

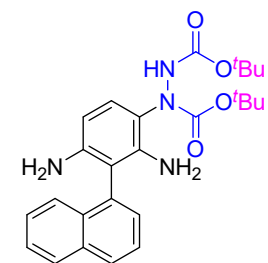

3c-rac

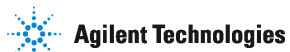

File of data: D:\ChemStation\2\Data\2023-11-18S 2023-11-18 11-05-50\zh-h-6-52.D  
 Sample name: zhh-6-52  
 Remarks: zhh-6-52  
 Acq. instrument: LCI260  
 Injection date: 2023/11/18 12:22:49  
 Acq. Method: IC-05-60.M  
 Analysis Method: IC-05-60.M  
 Last changed: 2024/4/19 15:25:51

Location: P2-D2  
 Inj: 1 of 1  
 Inj Volume: 10.000  
 Acq. Operator: system

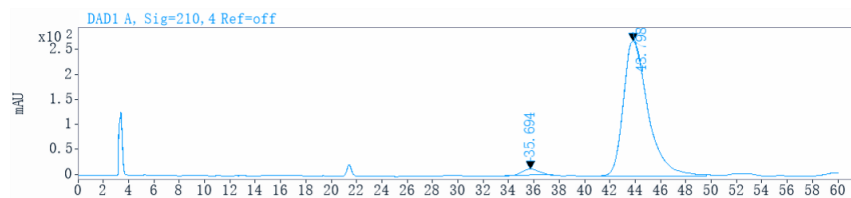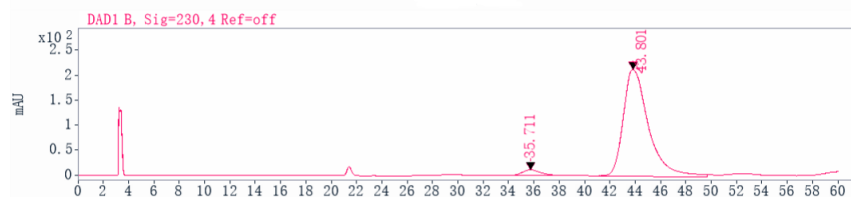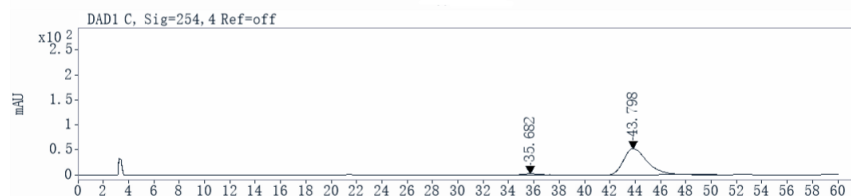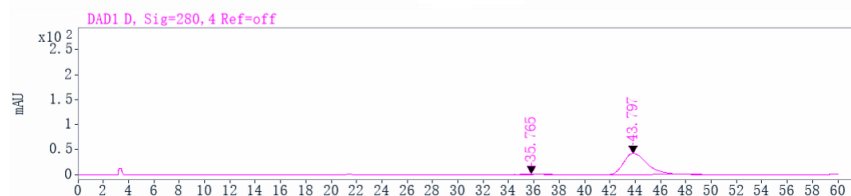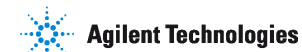

Signal: DAD1 A, Sig=210,4 Ref=off

| RetTime [min] | Type | Width [min] | Area [mAu*s] | Height [mAu\U] | Area% Name |
|---------------|------|-------------|--------------|----------------|------------|
| 35.694        | BB   | 1.1824      | 1362.8904    | 13.5625        | 3.5071     |
| 43.798        | MM   | 2.3015      | 37498.3438   | 271.5456       | 96.4929    |
| total         |      |             | 38861.2341   |                |            |

Signal: DAD1 B, Sig=230,4 Ref=off

| RetTime [min] | Type | Width [min] | Area [mAu*s] | Height [mAu\U] | Area% Name |
|---------------|------|-------------|--------------|----------------|------------|
| 35.711        | BB   | 1.2113      | 1181.1959    | 11.4908        | 3.7772     |
| 43.801        | MM   | 2.3382      | 30090.7129   | 214.4841       | 96.2228    |
| total         |      |             | 31271.9088   |                |            |

Signal: DAD1 C, Sig=254,4 Ref=off

| RetTime [min] | Type | Width [min] | Area [mAu*s] | Height [mAu\U] | Area% Name |
|---------------|------|-------------|--------------|----------------|------------|
| 35.682        | MM   | 1.6008      | 265.5793     | 2.7651         | 3.6060     |
| 43.798        | BB   | 1.6575      | 7099.2896    | 52.7702        | 96.3940    |
| total         |      |             | 7364.8689    |                |            |

Signal: DAD1 D, Sig=280,4 Ref=off

| RetTime [min] | Type | Width [min] | Area [mAu*s] | Height [mAu\U] | Area% Name |
|---------------|------|-------------|--------------|----------------|------------|
| 35.765        | MM   | 1.6282      | 230.0093     | 2.3544         | 3.8799     |
| 43.797        | BB   | 1.5950      | 5698.2881    | 42.8074        | 96.1201    |
| total         |      |             | 5928.2974    |                |            |

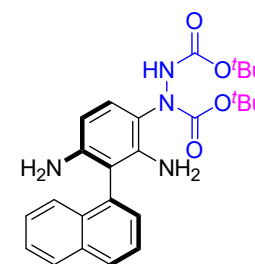

3c



## Agilent Technologies

File of data: D:\ChemStation\2\Data\2023-11-16.S 2023-11-16 09-41-22\zh-6-43-4.D  
 Sample name: zh-6-43-4  
 Remarks: zh-6-43-4  
 Acq. instrument: LCT260  
 Injection date: 2023/11/16 12:16:02  
 Acq. Method: IC-20-90.M  
 Analysis Method: IC-20-90.M  
 Last changed: 2024/4/19 15:30:41

Location: P2-D4  
 Inj: 1 of 1  
 Inj Volume: 10.000  
 Acq. Operator: system

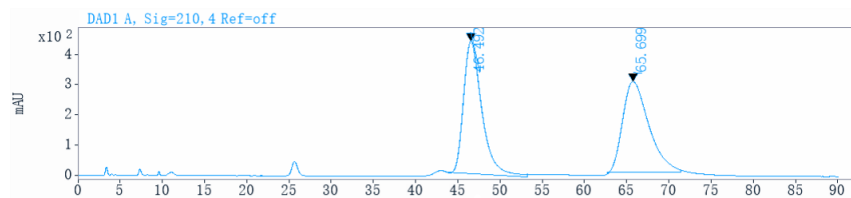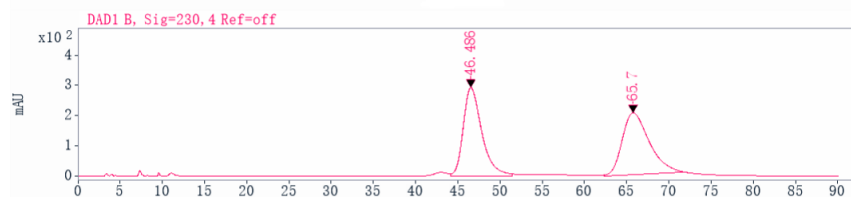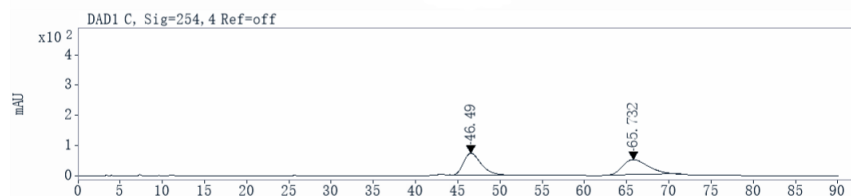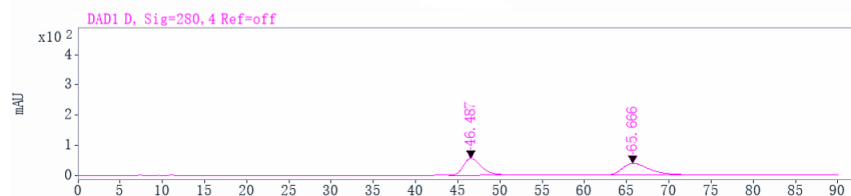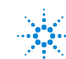

## Agilent Technologies

Signal: DAD1 A, Sig=210,4 Ref=off

| RetTime [min] | Type | Width [min] | Area [mAu*s] | Height [mAu\U] | Area% Name |
|---------------|------|-------------|--------------|----------------|------------|
| 46.492        | MM   | 2.5277      | 66984.1016   | 441.6737       | 50.2851    |
| 65.699        | MM   | 3.6330      | 66224.4219   | 303.8106       | 49.7149    |
|               |      |             | total        | 133208.5234    |            |

Signal: DAD1 B, Sig=230,4 Ref=off

| RetTime [min] | Type | Width [min] | Area [mAu*s] | Height [mAu\U] | Area% Name |
|---------------|------|-------------|--------------|----------------|------------|
| 46.486        | MM   | 2.5774      | 45740.6250   | 295.7771       | 49.6512    |
| 65.700        | MM   | 3.7425      | 46383.3086   | 206.5603       | 50.3488    |
|               |      |             | total        | 92123.9336     |            |

Signal: DAD1 C, Sig=254,4 Ref=off

| RetTime [min] | Type | Width [min] | Area [mAu*s] | Height [mAu\U] | Area% Name |
|---------------|------|-------------|--------------|----------------|------------|
| 46.490        | MM   | 2.5506      | 11441.3740   | 74.7620        | 50.8441    |
| 65.732        | MM   | 3.6053      | 11061.4590   | 51.1352        | 49.1559    |
|               |      |             | total        | 22502.8330     |            |

Signal: DAD1 D, Sig=280,4 Ref=off

| RetTime [min] | Type | Width [min] | Area [mAu*s] | Height [mAu\U] | Area% Name |
|---------------|------|-------------|--------------|----------------|------------|
| 46.487        | MM   | 2.5775      | 8907.2354    | 57.5966        | 50.5721    |
| 65.666        | MM   | 3.7064      | 8705.7109    | 39.1471        | 49.4279    |
|               |      |             | total        | 17612.9463     |            |

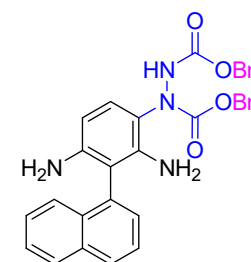

3d-rac





File of data: D:\ChemStation\2\Data\2023-11-21S 2023-11-21 21-19-07\zh-h-6-56.D  
 Sample name: zhh-6-56  
 Remarks: zhh-6-56  
 Acq. instrument: LCI260  
 Injection date: 2023/11/21 21:32:10  
 Acq. Method: IC-20-90.M  
 Analysis Method: IC-20-90.M  
 Last changed: 2024/4/19 15:32:41

Location: P2-D9  
 Inj: 1 of 1  
 Inj Volume: 10.000  
 Acq. Operator: system

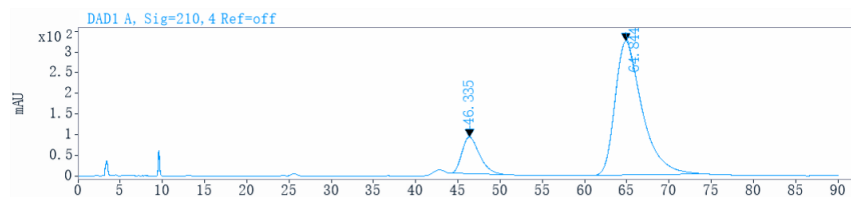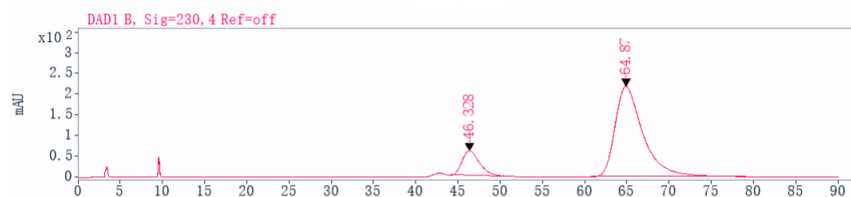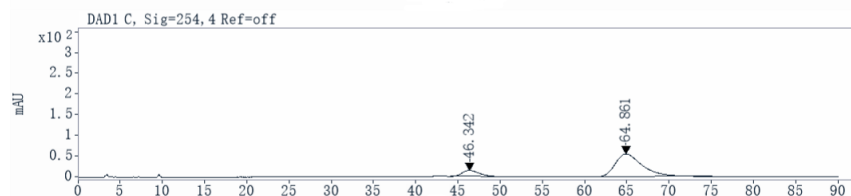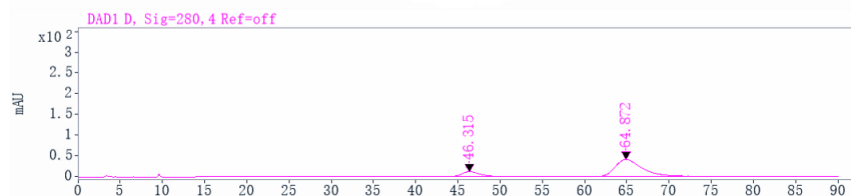

Signal: DAD1 A, Sig=210,4 Ref=off

| RetTime [min] | Type | Width [min] | Area [mAu*s] | Height [mAu\U] | Area% Name |
|---------------|------|-------------|--------------|----------------|------------|
| 46.335        | MM   | 2.4190      | 12823.2695   | 88.3522        | 15.0567    |
| 64.844        | BB   | 2.6181      | 72343.0156   | 323.3576       | 84.9433    |
| total         |      |             | 85166.2852   |                |            |

Signal: DAD1 B, Sig=230,4 Ref=off

| RetTime [min] | Type | Width [min] | Area [mAu*s] | Height [mAu\U] | Area% Name |
|---------------|------|-------------|--------------|----------------|------------|
| 46.328        | MM   | 2.3987      | 8498.8535    | 59.0520        | 14.4172    |
| 64.870        | BB   | 2.9644      | 50450.6211   | 217.9615       | 85.5828    |
| total         |      |             | 58949.4746   |                |            |

Signal: DAD1 C, Sig=254,4 Ref=off

| RetTime [min] | Type | Width [min] | Area [mAu*s] | Height [mAu\U] | Area% Name |
|---------------|------|-------------|--------------|----------------|------------|
| 46.342        | BB   | 1.7064      | 2150.7839    | 14.8440        | 14.6717    |
| 64.861        | BB   | 2.6806      | 12508.6699   | 54.9740        | 85.3283    |
| total         |      |             | 14659.4539   |                |            |

Signal: DAD1 D, Sig=280,4 Ref=off

| RetTime [min] | Type | Width [min] | Area [mAu*s] | Height [mAu\U] | Area% Name |
|---------------|------|-------------|--------------|----------------|------------|
| 46.315        | BB   | 1.7417      | 1724.2247    | 11.5898        | 15.6909    |
| 64.872        | MM   | 3.7249      | 9264.4541    | 41.4531        | 84.3091    |
| total         |      |             | 10988.6788   |                |            |

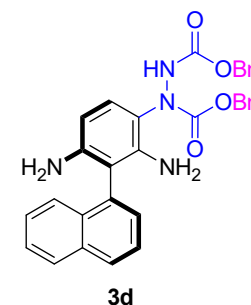



## Agilent Technologies

File of data: D:\ChemStation\2\Data\2023-11-19S 2023-11-19 19-50-37\zhh-6-43-5rac-ad.D  
 Sample name: zhh-6-43-5rac-ad  
 Remarks: zhh-6-43-5rac-ad  
 Acq. instrument: LCT260  
 Injection date: 2023/11/19 22:27:31  
 Acq. Method: AD-30-120.M  
 Analysis Method: AD-30-120.M  
 Last changed: 2024/4/19 15:39:42

Location: P2-D8  
 Inj: 1 of 1  
 Inj Volume: 10.000  
 Acq. Operator: system

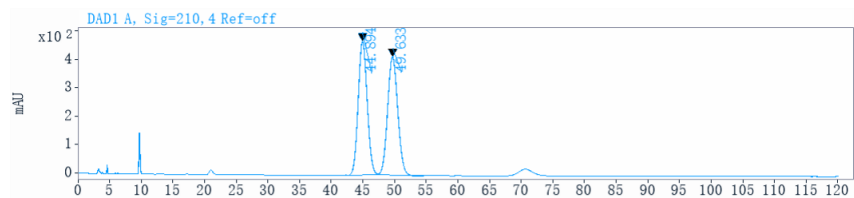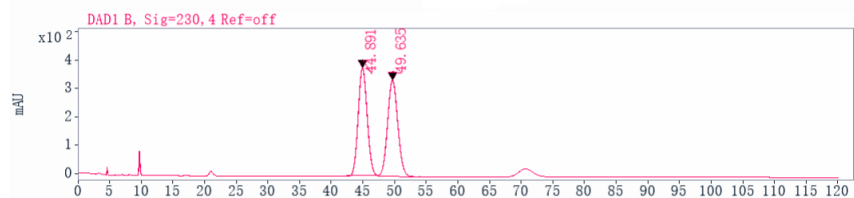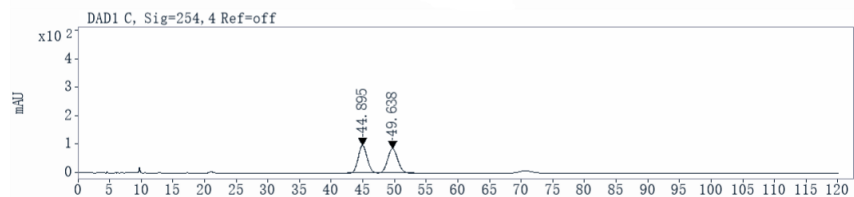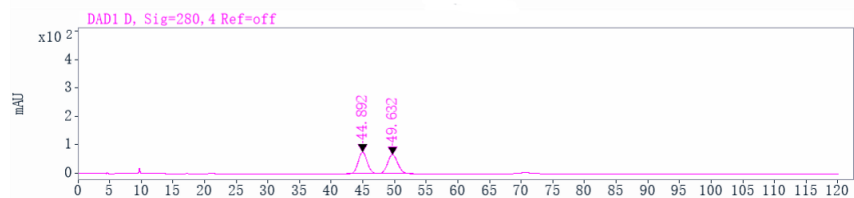

## Agilent Technologies

Signal: DAD1 A, Sig=210,4 Ref=off

| RetTime [min] | Type | Width [min] | Area [mAu*s] | Height [mAu\U] | Area% Name |
|---------------|------|-------------|--------------|----------------|------------|
| 44.894        | MM   | 1.6612      | 47183.8242   | 473.3937       | 49.7960    |
| 49.633        | MM   | 1.8914      | 47570.5117   | 419.1913       | 50.2040    |
|               |      |             | total        | 94754.3359     |            |

Signal: DAD1 B, Sig=230,4 Ref=off

| RetTime [min] | Type | Width [min] | Area [mAu*s] | Height [mAu\U] | Area% Name |
|---------------|------|-------------|--------------|----------------|------------|
| 44.891        | MM   | 1.6574      | 37961.5625   | 381.7308       | 49.2867    |
| 49.635        | MM   | 1.9077      | 39060.3320   | 341.2440       | 50.7133    |
|               |      |             | total        | 77021.8945     |            |

Signal: DAD1 C, Sig=254,4 Ref=off

| RetTime [min] | Type | Width [min] | Area [mAu*s] | Height [mAu\U] | Area% Name |
|---------------|------|-------------|--------------|----------------|------------|
| 44.895        | BB   | 1.4735      | 9614.8584    | 97.7563        | 50.1260    |
| 49.638        | BB   | 1.6718      | 9566.5176    | 86.2654        | 49.8740    |
|               |      |             | total        | 19181.3760     |            |

Signal: DAD1 D, Sig=280,4 Ref=off

| RetTime [min] | Type | Width [min] | Area [mAu*s] | Height [mAu\U] | Area% Name |
|---------------|------|-------------|--------------|----------------|------------|
| 44.892        | BB   | 1.4753      | 7497.2266    | 76.2390        | 50.1637    |
| 49.632        | BB   | 1.6429      | 7448.3071    | 67.2094        | 49.8363    |
|               |      |             | total        | 14945.5337     |            |

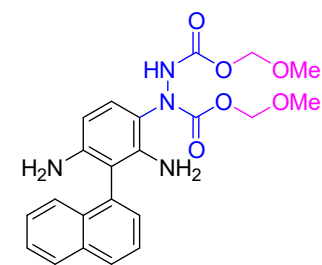

3e-rac



File of data: D:\ChemStation\2\Data\2023-11-21S 2023-11-21 21-19-07\zh-6-58.D  
 Sample name: zh-6-58  
 Remarks: zh-6-58  
 Acq. instrument: LC1260  
 Injection date: 2023/11/22 0:57:39  
 Acq. Method: AD-30-120.M  
 Analysis Method: AD-30-120.M  
 Last changed: 2024/4/19 15:38:45

Location: P2-D11  
 Inj: 1 of 1  
 Inj Volume: 10.000  
 Acq. Operator: system

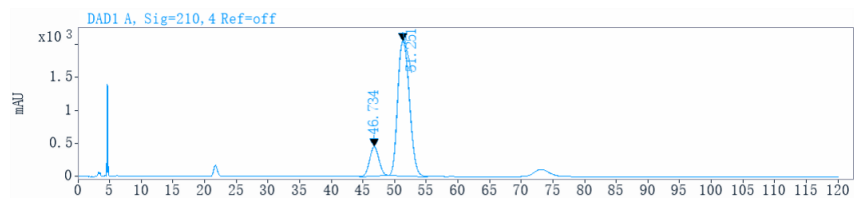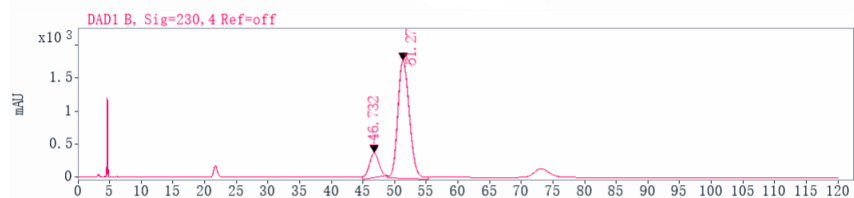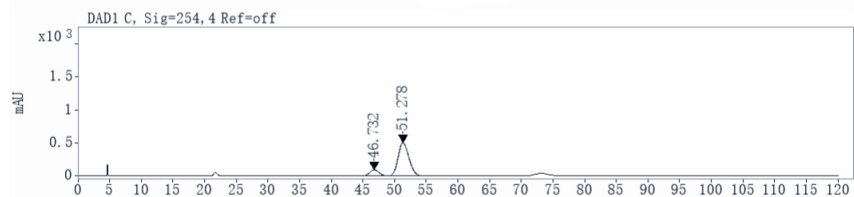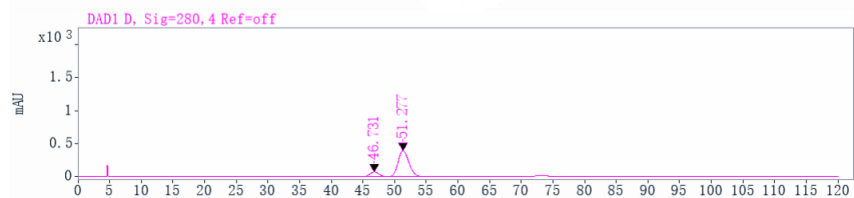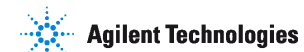

Signal: DAD1 A, Sig=210,4 Ref=off

| RetTime [min] | Type | Width [min] | Area [mAu*s] | Height [mAu\U] | Area% Name |
|---------------|------|-------------|--------------|----------------|------------|
| 46.734        | MM   | 1.7482      | 47888.5000   | 456.5598       | 15.1311    |
| 51.251        | MM   | 2.1766      | 268602.7500  | 2056.7227      | 84.8689    |
| total         |      |             | 316491.2500  |                |            |

Signal: DAD1 B, Sig=230,4 Ref=off

| RetTime [min] | Type | Width [min] | Area [mAu*s] | Height [mAu\U] | Area% Name |
|---------------|------|-------------|--------------|----------------|------------|
| 46.732        | MM   | 1.7781      | 40706.1875   | 381.5614       | 15.0184    |
| 51.270        | MM   | 2.1414      | 230335.1250  | 1792.7108      | 84.9816    |
| total         |      |             | 271041.3125  |                |            |

Signal: DAD1 C, Sig=254,4 Ref=off

| RetTime [min] | Type | Width [min] | Area [mAu*s] | Height [mAu\U] | Area% Name |
|---------------|------|-------------|--------------|----------------|------------|
| 46.732        | BB   | 1.5260      | 9449.6914    | 93.2737        | 13.3109    |
| 51.278        | MM   | 2.0110      | 61542.1719   | 510.0447       | 86.6891    |
| total         |      |             | 70991.8633   |                |            |

Signal: DAD1 D, Sig=280,4 Ref=off

| RetTime [min] | Type | Width [min] | Area [mAu*s] | Height [mAu\U] | Area% Name |
|---------------|------|-------------|--------------|----------------|------------|
| 46.731        | BB   | 1.4771      | 7353.0654    | 72.6351        | 13.2601    |
| 51.277        | MM   | 2.0114      | 48099.5313   | 398.5588       | 86.7399    |
| total         |      |             | 55452.5967   |                |            |

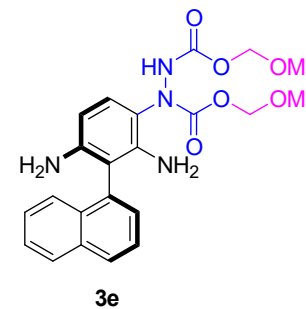



File of data: D:\ChemStation\2\Data\20231203.1S 2023-12-04 09-32-08\ZHH-6-72RAC.D  
 Sample name: ZHH-6-72RAC  
 Remarks: ZHH-6-72RAC  
 Acq. instrument: LC1260  
 Injection date: 2023/12/7 12:17:19  
 Acq. Method: IC-10-60.M  
 Analysis Method: IC-10-60.M  
 Last changed: 2024/4/19 15:49:23

Location: P2-D5  
 Inj: 1 of 1  
 Inj Volume: 10.000  
 Acq. Operator: system

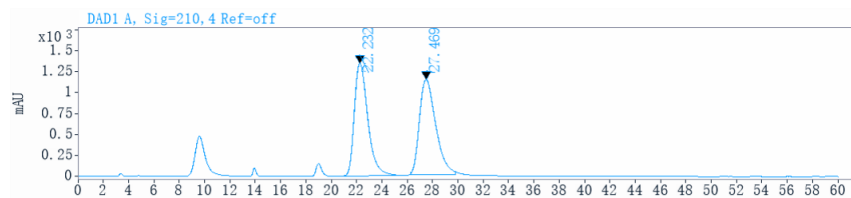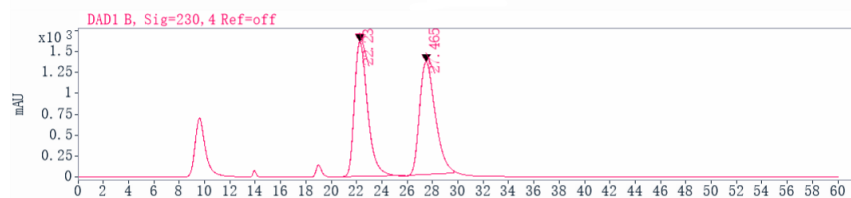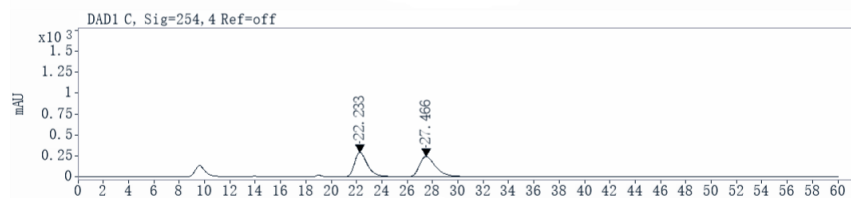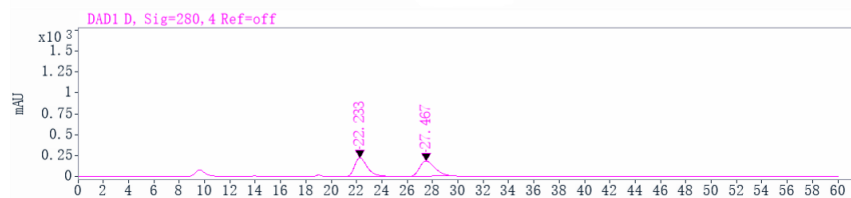

Signal: DAD1 A, Sig=210,4 Ref=off

| RetTime [min] | Type | Width [min] | Area [mAu*s] | Height [mAu\U] | Area% Name |
|---------------|------|-------------|--------------|----------------|------------|
| 22.232        | BB   | 1.1337      | 100843.1797  | 1352.7079      | 49.2473    |
| 27.469        | MM   | 1.5042      | 103925.9531  | 1151.5234      | 50.7527    |
|               |      |             | total        | 204769.1328    |            |

Signal: DAD1 B, Sig=230,4 Ref=off

| RetTime [min] | Type | Width [min] | Area [mAu*s] | Height [mAu\U] | Area% Name |
|---------------|------|-------------|--------------|----------------|------------|
| 22.230        | BB   | 1.1241      | 118510.6172  | 1618.7372      | 50.0738    |
| 27.465        | MM   | 1.4529      | 118161.4063  | 1355.4799      | 49.9262    |
|               |      |             | total        | 236672.0234    |            |

Signal: DAD1 C, Sig=254,4 Ref=off

| RetTime [min] | Type | Width [min] | Area [mAu*s] | Height [mAu\U] | Area% Name |
|---------------|------|-------------|--------------|----------------|------------|
| 22.233        | BB   | 1.0923      | 20956.1309   | 293.0591       | 49.0423    |
| 27.466        | BB   | 1.3312      | 21774.5527   | 244.4473       | 50.9577    |
|               |      |             | total        | 42730.6836     |            |

Signal: DAD1 D, Sig=280,4 Ref=off

| RetTime [min] | Type | Width [min] | Area [mAu*s] | Height [mAu\U] | Area% Name |
|---------------|------|-------------|--------------|----------------|------------|
| 22.233        | BB   | 1.0908      | 15952.1621   | 224.0188       | 50.6324    |
| 27.467        | MM   | 1.4101      | 15553.6592   | 183.8388       | 49.3676    |
|               |      |             | total        | 31505.8213     |            |

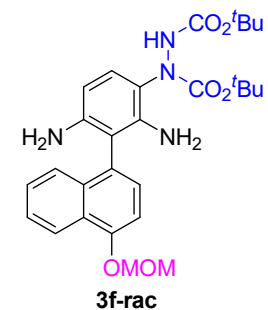

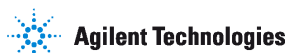

File of data: D:\ChemStation\2\Data\2023-11-30S 2023-11-30 10-06-33\ZHH-6-72.D  
 Sample name: ZHH-6-72  
 Remarks: ZHH-6-72  
 Acq. instrument: LC1260  
 Injection date: 2023/12/1 22:50:41  
 Acq. Method: IC-10-60.M  
 Analysis Method: IC-10-60.M  
 Last changed: 2024/4/19 15:51:24

Location: P2-D6  
 Inj: 1 of 1  
 Inj Volume: 5.000  
 Acq. Operator: system

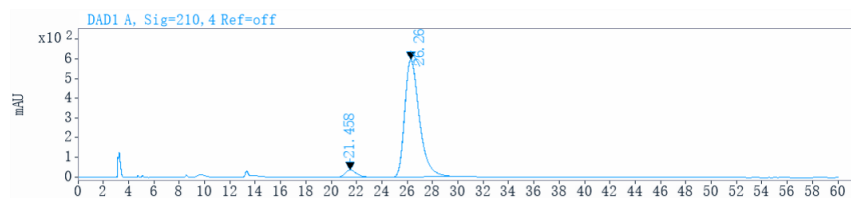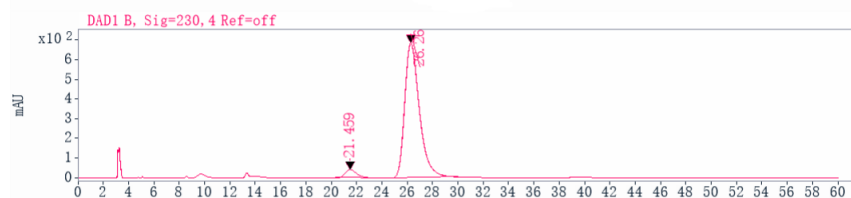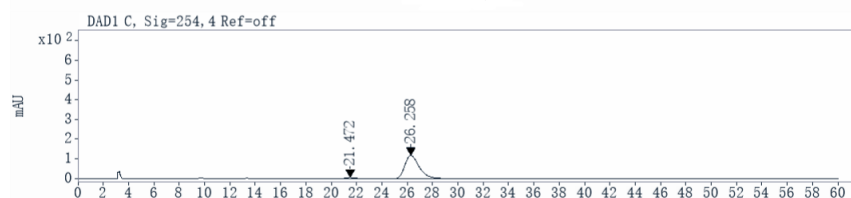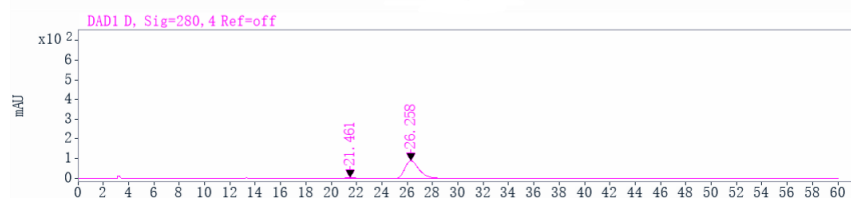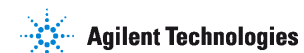

Signal: DAD1 A, Sig=210,4 Ref=off

| RetTime [min] | Type | Width [min] | Area [mAu*s] | Height [mAu\U] | Area% Name |
|---------------|------|-------------|--------------|----------------|------------|
| 21.458        | BB   | 0.8734      | 2369.5669    | 36.9863        | 4.6842     |
| 26.260        | BB   | 1.2244      | 48216.4648   | 596.8870       | 95.3158    |
|               |      |             | total        | 50586.0317     |            |

Signal: DAD1 B, Sig=230,4 Ref=off

| RetTime [min] | Type | Width [min] | Area [mAu*s] | Height [mAu\U] | Area% Name |
|---------------|------|-------------|--------------|----------------|------------|
| 21.459        | BB   | 0.9529      | 2775.1357    | 43.0010        | 4.7965     |
| 26.260        | BB   | 1.2211      | 55082.0586   | 684.3180       | 95.2035    |
|               |      |             | total        | 57857.1943     |            |

Signal: DAD1 C, Sig=254,4 Ref=off

| RetTime [min] | Type | Width [min] | Area [mAu*s] | Height [mAu\U] | Area% Name |
|---------------|------|-------------|--------------|----------------|------------|
| 21.472        | BB   | 0.7602      | 470.2677     | 7.3529         | 4.7083     |
| 26.258        | BB   | 1.2111      | 9517.8760    | 118.7430       | 95.2917    |
|               |      |             | total        | 9988.1436      |            |

Signal: DAD1 D, Sig=280,4 Ref=off

| RetTime [min] | Type | Width [min] | Area [mAu*s] | Height [mAu\U] | Area% Name |
|---------------|------|-------------|--------------|----------------|------------|
| 21.461        | BB   | 0.7664      | 363.2419     | 5.6625         | 4.7684     |
| 26.258        | BB   | 1.2071      | 7254.4521    | 90.5080        | 95.2316    |
|               |      |             | total        | 7617.6941      |            |

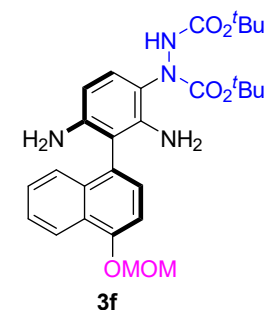



File of data: D:\ChemStation\2\Data\2023-11-30S 2023-11-30 10-06-33\zhh-6-68rac..D  
 Sample name: zhh-6-68rac.  
 Remarks: zhh-6-68rac.  
 Acq. instrument: LCT260  
 Injection date: 2023/11/30 14:30:40  
 Acq. Method: IC-05-90.M  
 Analysis Method: IC-05-90.M  
 Last changed: 2024/4/19 15:41:15

Location: P2-D3  
 Inj: 1 of 1  
 Inj Volume: 10.000  
 Acq. Operator: system

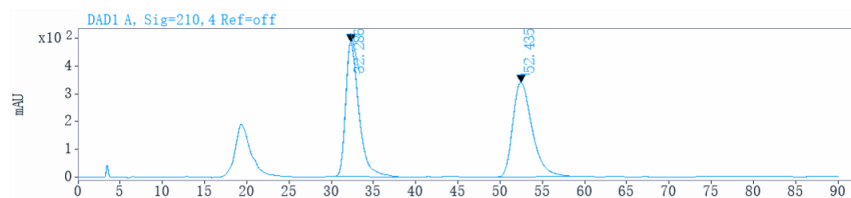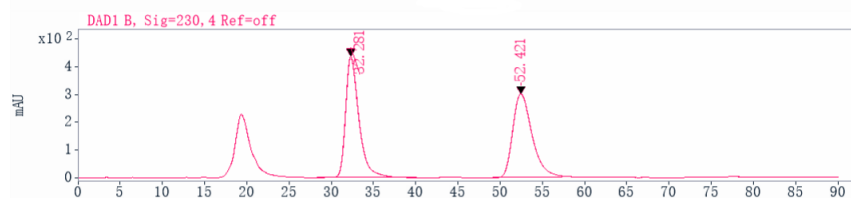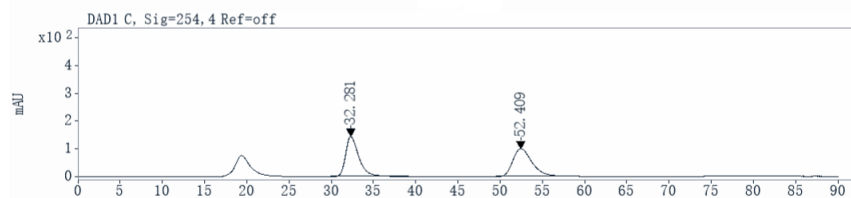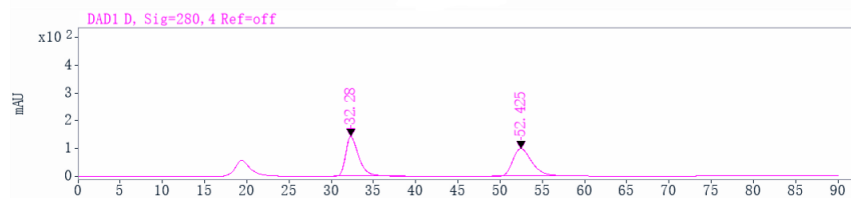

Signal: DAD1 A, Sig=210,4 Ref=off

| RetTime [min] | Type | Width [min] | Area [mAu*s] | Height [mAu\U] | Area% Name |
|---------------|------|-------------|--------------|----------------|------------|
| 32.286        | BB   | 1.5530      | 53400.2852   | 485.5673       | 49.3394    |
| 52.435        | BB   | 1.9417      | 54830.1797   | 340.6822       | 50.6606    |
| total         |      |             | 108230.4648  |                |            |

Signal: DAD1 B, Sig=230,4 Ref=off

| RetTime [min] | Type | Width [min] | Area [mAu*s] | Height [mAu\U] | Area% Name |
|---------------|------|-------------|--------------|----------------|------------|
| 32.281        | BB   | 1.6783      | 48268.4141   | 437.1052       | 50.2198    |
| 52.421        | MM   | 2.6561      | 47845.8008   | 300.2206       | 49.7802    |
| total         |      |             | 96114.2148   |                |            |

Signal: DAD1 C, Sig=254,4 Ref=off

| RetTime [min] | Type | Width [min] | Area [mAu*s] | Height [mAu\U] | Area% Name |
|---------------|------|-------------|--------------|----------------|------------|
| 32.281        | BB   | 1.6068      | 15749.6768   | 144.5959       | 49.9959    |
| 52.409        | MM   | 2.6387      | 15752.2314   | 99.4958        | 50.0041    |
| total         |      |             | 31501.9082   |                |            |

Signal: DAD1 D, Sig=280,4 Ref=off

| RetTime [min] | Type | Width [min] | Area [mAu*s] | Height [mAu\U] | Area% Name |
|---------------|------|-------------|--------------|----------------|------------|
| 32.280        | BB   | 1.6258      | 15602.7217   | 143.8046       | 49.5539    |
| 52.425        | MM   | 2.6696      | 15883.6201   | 99.1636        | 50.4461    |
| total         |      |             | 31486.3418   |                |            |

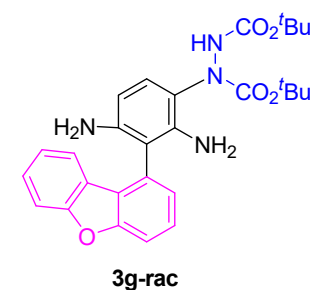



File of data: D:\ChemStation\2\Data\2023-11-30S 2023-11-30 10-06-33\zh-6-68..D  
 Sample name: zh-6-68.  
 Remarks: zh-6-68.  
 Acq. instrument: LCT260  
 Injection date: 2023/11/30 16:02:17  
 Acq. Method: IC-05-90.M  
 Analysis Method: IC-05-90.M  
 Last changed: 2024/4/19 15:41:15

Location: P2-D1  
 Inj: 1 of 1  
 Inj Volume: 10.000  
 Acq. Operator: system

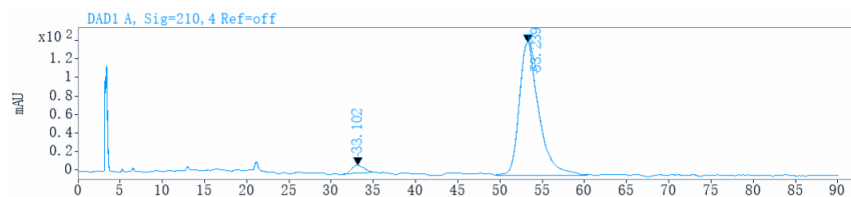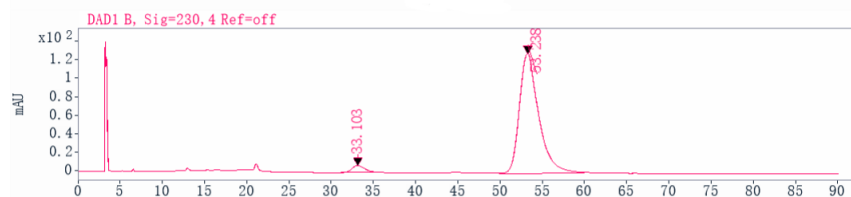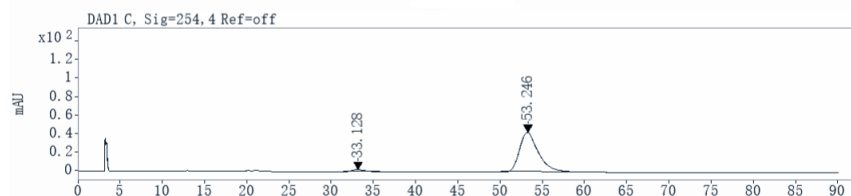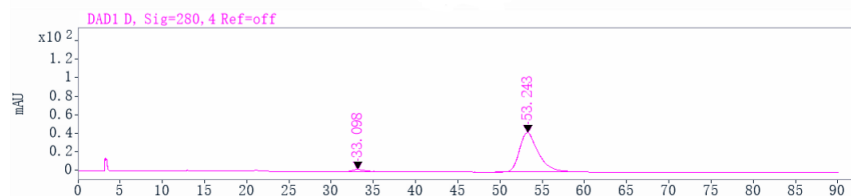

Signal: DAD1 A, Sig=210,4 Ref=off

| RetTime [min] | Type | Width [min] | Area [mAu*s] | Height [mAu\U] | Area% Name |
|---------------|------|-------------|--------------|----------------|------------|
| 33.102        | BB   | 1.2587      | 979.1064     | 9.1772         | 4.0039     |
| 53.239        | MM   | 2.7150      | 23474.8379   | 144.1081       | 95.9961    |
| total         |      |             | 24453.9443   |                |            |

Signal: DAD1 B, Sig=230,4 Ref=off

| RetTime [min] | Type | Width [min] | Area [mAu*s] | Height [mAu\U] | Area% Name |
|---------------|------|-------------|--------------|----------------|------------|
| 33.103        | BB   | 1.2654      | 827.0163     | 7.6732         | 3.8441     |
| 53.238        | MM   | 2.6591      | 20687.1563   | 129.6647       | 96.1559    |
| total         |      |             | 21514.1725   |                |            |

Signal: DAD1 C, Sig=254,4 Ref=off

| RetTime [min] | Type | Width [min] | Area [mAu*s] | Height [mAu\U] | Area% Name |
|---------------|------|-------------|--------------|----------------|------------|
| 33.128        | MM   | 1.6427      | 234.7435     | 2.3816         | 3.4456     |
| 53.246        | MM   | 2.5760      | 6578.1484    | 42.5611        | 96.5544    |
| total         |      |             | 6812.8920    |                |            |

Signal: DAD1 D, Sig=280,4 Ref=off

| RetTime [min] | Type | Width [min] | Area [mAu*s] | Height [mAu\U] | Area% Name |
|---------------|------|-------------|--------------|----------------|------------|
| 33.098        | MM   | 1.8160      | 283.7657     | 2.6043         | 4.0680     |
| 53.243        | MM   | 2.6250      | 6691.7490    | 42.4865        | 95.9320    |
| total         |      |             | 6975.5147    |                |            |

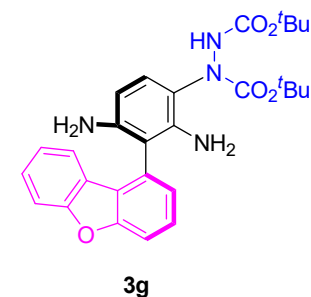



File of data: D:\ChemStation\2\Data\2023-12-20-2S 2023-12-20 16-43-00\ZHH-6-92RAC.D  
 Sample name: ZHH-6-92RAC  
 Remarks: ZHH-6-92RAC  
 Acq. instrument: LCI260  
 Injection date: 2023/12/20 20:22:59  
 Acq. Method: IC-03-90.M  
 Analysis Method: IC-03-90.M  
 Last changed: 2024/4/19 15:57:32

Location: P2-D2  
 Inj: 1 of 1  
 Inj Volume: 10.000  
 Acq. Operator: system

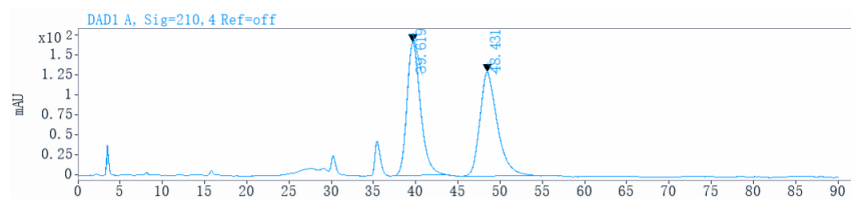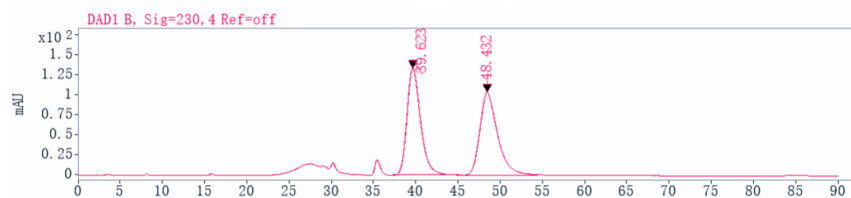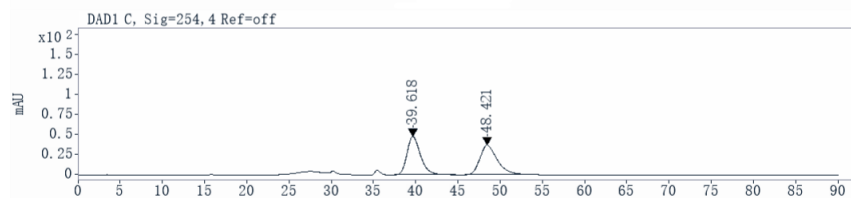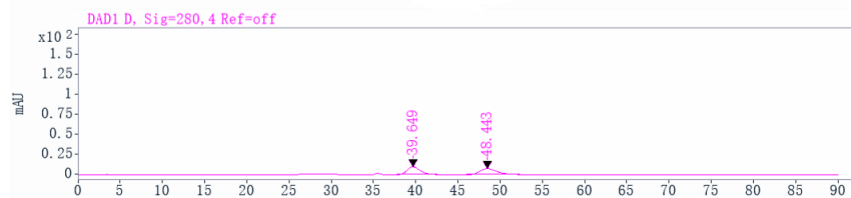

Signal: DAD1 A, Sig=210,4 Ref=off

| RetTime [min] | Type | Width [min] | Area [mAu*s] | Height [mAu\U] | Area% Name |
|---------------|------|-------------|--------------|----------------|------------|
| 39.619        | BB   | 1.4160      | 18733.3926   | 166.5855       | 49.7115    |
| 48.431        | MM   | 2.4158      | 18950.8535   | 130.7437       | 50.2885    |
|               |      |             | total        | 37684.2461     |            |

Signal: DAD1 B, Sig=230,4 Ref=off

| RetTime [min] | Type | Width [min] | Area [mAu*s] | Height [mAu\U] | Area% Name |
|---------------|------|-------------|--------------|----------------|------------|
| 39.623        | BB   | 1.6504      | 15030.0527   | 133.6060       | 49.1343    |
| 48.432        | MM   | 2.4740      | 15559.6572   | 104.8193       | 50.8657    |
|               |      |             | total        | 30589.7100     |            |

Signal: DAD1 C, Sig=254,4 Ref=off

| RetTime [min] | Type | Width [min] | Area [mAu*s] | Height [mAu\U] | Area% Name |
|---------------|------|-------------|--------------|----------------|------------|
| 39.618        | BB   | 1.4311      | 5364.0117    | 47.9502        | 50.2156    |
| 48.421        | BB   | 1.7320      | 5317.9546    | 37.1970        | 49.7844    |
|               |      |             | total        | 10681.9663     |            |

Signal: DAD1 D, Sig=280,4 Ref=off

| RetTime [min] | Type | Width [min] | Area [mAu*s] | Height [mAu\U] | Area% Name |
|---------------|------|-------------|--------------|----------------|------------|
| 39.649        | BB   | 1.2676      | 1043.5813    | 9.6969         | 49.2300    |
| 48.443        | MM   | 2.3523      | 1076.2256    | 7.6252         | 50.7700    |
|               |      |             | total        | 2119.8069      |            |

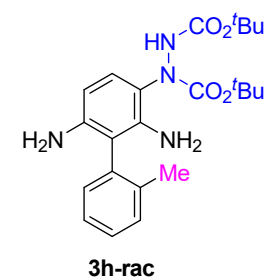





File of data: D:\ChemStation\2\Data\2023-12-20-2S 2023-12-20 16-43-00\ZHH-6-92.D  
 Sample name: ZHH-6-92  
 Remarks: ZHH-6-92  
 Acq. instrument: LCT1260  
 Injection date: 2023/12/20 21:54:41  
 Acq. Method: IC-03-90.M  
 Analysis Method: IC-03-90.M  
 Last changed: 2024/4/19 15:57:32

Location: P2-D1  
 Inj: 1 of 1  
 Inj Volume: 10.000  
 Acq. Operator: system

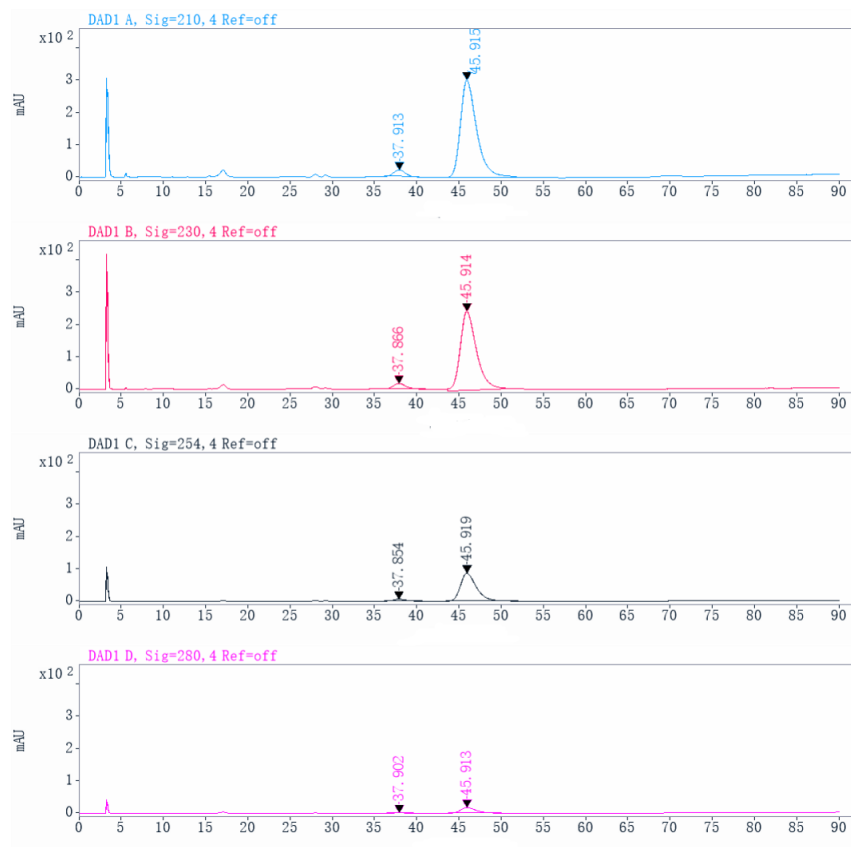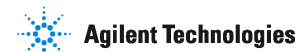

Signal: DAD1 A, Sig=210,4 Ref=off

| RetTime [min] | Type | Width [min] | Area [mAu*s] | Height [mAu\U] | Area% Name |
|---------------|------|-------------|--------------|----------------|------------|
| 37.913        | BB   | 1.1712      | 2140.3418    | 21.5415        | 4.9617     |
| 45.915        | MM   | 2.2565      | 40996.6875   | 302.8064       | 95.0383    |
| total         |      |             | 43137.0293   |                |            |

Signal: DAD1 B, Sig=230,4 Ref=off

| RetTime [min] | Type | Width [min] | Area [mAu*s] | Height [mAu\U] | Area% Name |
|---------------|------|-------------|--------------|----------------|------------|
| 37.866        | BB   | 1.2209      | 1761.7686    | 17.0582        | 5.0357     |
| 45.914        | MM   | 2.2576      | 33223.8047   | 245.2700       | 94.9643    |
| total         |      |             | 34985.5732   |                |            |

Signal: DAD1 C, Sig=254,4 Ref=off

| RetTime [min] | Type | Width [min] | Area [mAu*s] | Height [mAu\U] | Area% Name |
|---------------|------|-------------|--------------|----------------|------------|
| 37.854        | BB   | 1.1864      | 610.9688     | 6.0385         | 5.0831     |
| 45.919        | BB   | 1.7650      | 11408.7354   | 86.8248        | 94.9169    |
| total         |      |             | 12019.7042   |                |            |

Signal: DAD1 D, Sig=280,4 Ref=off

| RetTime [min] | Type | Width [min] | Area [mAu*s] | Height [mAu\U] | Area% Name |
|---------------|------|-------------|--------------|----------------|------------|
| 37.902        | MM   | 1.6449      | 129.1686     | 1.3088         | 5.3935     |
| 45.913        | BB   | 1.5091      | 2265.7273    | 17.6802        | 94.6065    |
| total         |      |             | 2394.8959    |                |            |

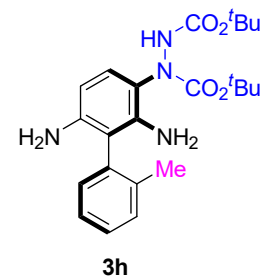



File of data: D:\ChemStation\2\Data\2023-12-13S 2023-12-13 09-01-46\ZHH-6-78RAC.D  
 Sample name: ZHH-6-78RAC  
 Remarks: ZHH-6-78RAC  
 Acq. instrument: LCT1260  
 Injection date: 2023/12/13 9:14:44  
 Acq. Method: IC-05-120.M  
 Analysis Method: IC-05-120.M  
 Last changed: 2024/4/19 15:54:57

Location: P2-C11  
 Inj: 1 of 1  
 Inj Volume: 15.000  
 Acq. Operator: system

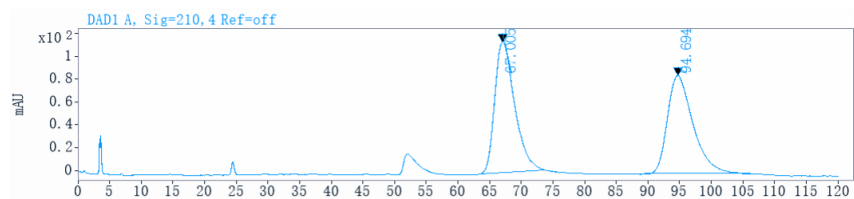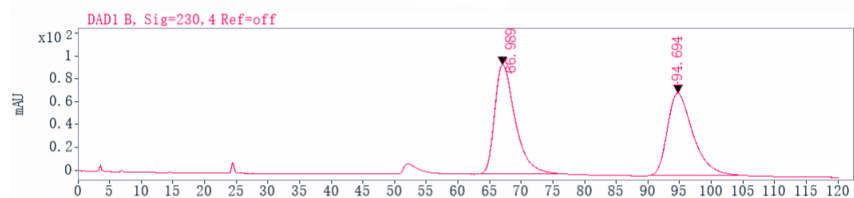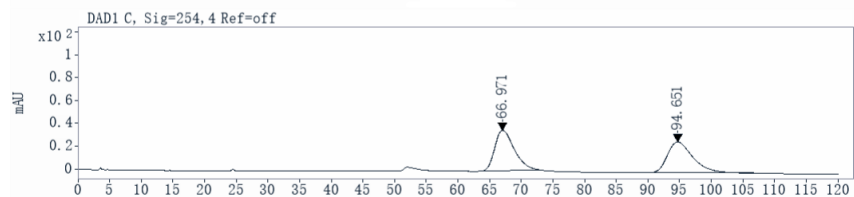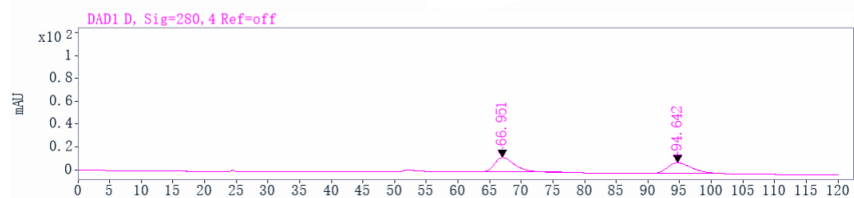

Signal: DAD1 A, Sig=210,4 Ref=off

| RetTime [min] | Type | Width [min] | Area [mAu*s] | Height [mAu\U] | Area% Name |
|---------------|------|-------------|--------------|----------------|------------|
| 67.005        | BB   | 2.5735      | 25161.0684   | 114.6007       | 50.7621    |
| 94.694        | MM   | 4.7034      | 24405.5703   | 86.4818        | 49.2379    |
| total         |      |             | 49566.6387   |                |            |

Signal: DAD1 B, Sig=230,4 Ref=off

| RetTime [min] | Type | Width [min] | Area [mAu*s] | Height [mAu\U] | Area% Name |
|---------------|------|-------------|--------------|----------------|------------|
| 66.989        | BB   | 2.6690      | 21737.7090   | 95.8802        | 51.5321    |
| 94.694        | BB   | 3.3022      | 20445.1563   | 72.5847        | 48.4679    |
| total         |      |             | 42182.8652   |                |            |

Signal: DAD1 C, Sig=254,4 Ref=off

| RetTime [min] | Type | Width [min] | Area [mAu*s] | Height [mAu\U] | Area% Name |
|---------------|------|-------------|--------------|----------------|------------|
| 66.971        | MM   | 3.5822      | 7590.5161    | 35.3158        | 50.2294    |
| 94.651        | MM   | 4.6364      | 7521.1953    | 27.0371        | 49.7706    |
| total         |      |             | 15111.7114   |                |            |

Signal: DAD1 D, Sig=280,4 Ref=off

| RetTime [min] | Type | Width [min] | Area [mAu*s] | Height [mAu\U] | Area% Name |
|---------------|------|-------------|--------------|----------------|------------|
| 66.951        | MM   | 3.6444      | 2741.9766    | 12.5397        | 50.6316    |
| 94.642        | MM   | 4.6347      | 2673.5674    | 9.6143         | 49.3684    |
| total         |      |             | 5415.5439    |                |            |

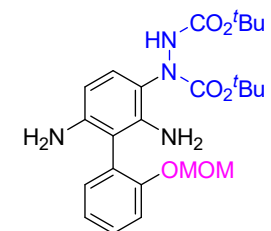

3i-rac



File of data: D:\ChemStation\2\Data\2023-12-13S 2023-12-13 09-01-46\ZHH-6-78.D  
 Sample name: ZHH-6-78  
 Remarks: ZHH-6-78  
 Acq. instrument: LCT260  
 Injection date: 2023/12/13 11:16:22  
 Acq. Method: IC-05-120.M  
 Analysis Method: IC-05-120.M  
 Last changed: 2024/4/19 15:54:57

Location: P2-D2  
 Inj: 1 of 1  
 Inj Volume: 15.000  
 Acq. Operator: system

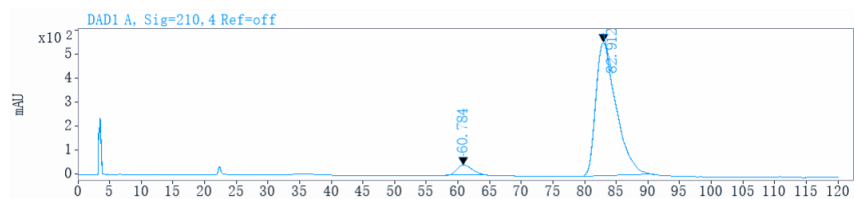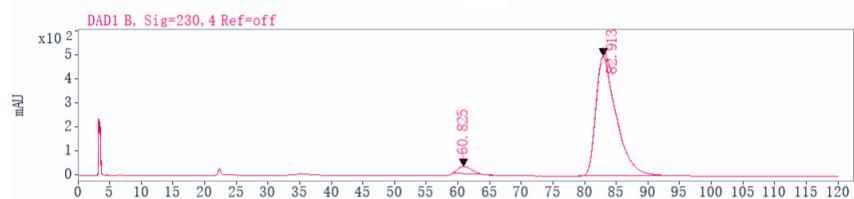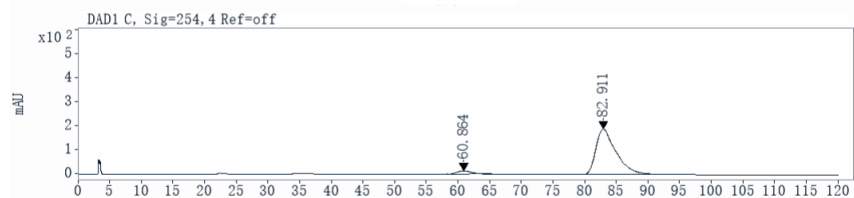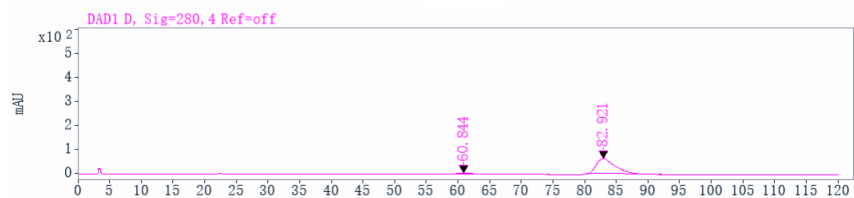

Signal: DAD1 A, Sig=210,4 Ref=off

| RetTime [min] | Type | Width [min] | Area [mAu*s] | Height [mAu\U] | Area% Name |
|---------------|------|-------------|--------------|----------------|------------|
| 60.784        | MM   | 2.8175      | 7199.7046    | 42.5896        | 5.4609     |
| 82.912        | BB   | 2.6508      | 124641.1875  | 558.2474       | 94.5391    |
|               |      |             | total        | 131840.8921    |            |

Signal: DAD1 B, Sig=230,4 Ref=off

| RetTime [min] | Type | Width [min] | Area [mAu*s] | Height [mAu\U] | Area% Name |
|---------------|------|-------------|--------------|----------------|------------|
| 60.825        | BB   | 1.8894      | 5167.9224    | 32.1488        | 4.4065     |
| 82.913        | BB   | 3.1099      | 112110.6953  | 500.3811       | 95.5935    |
|               |      |             | total        | 117278.6177    |            |

Signal: DAD1 C, Sig=254,4 Ref=off

| RetTime [min] | Type | Width [min] | Area [mAu*s] | Height [mAu\U] | Area% Name |
|---------------|------|-------------|--------------|----------------|------------|
| 60.864        | MM   | 2.8179      | 2304.9470    | 13.6325        | 5.1930     |
| 82.911        | BB   | 2.6808      | 42080.5469   | 190.0834       | 94.8070    |
|               |      |             | total        | 44385.4939     |            |

Signal: DAD1 D, Sig=280,4 Ref=off

| RetTime [min] | Type | Width [min] | Area [mAu*s] | Height [mAu\U] | Area% Name |
|---------------|------|-------------|--------------|----------------|------------|
| 60.844        | MM   | 2.4801      | 617.9988     | 4.1531         | 4.3068     |
| 82.921        | BB   | 2.5530      | 13731.2588   | 64.4132        | 95.6932    |
|               |      |             | total        | 14349.2576     |            |

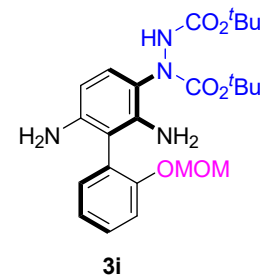

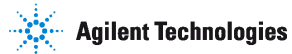

File of data: D:\ChemStation\2\Data\2024-4-21.S 2024-04-21 15-11-13\ZH-7-12RAC.D  
 Sample name: ZHH-7-12RAC  
 Remarks: ZHH-7-12RAC  
 Acq. instrument: LC1260  
 Injection date: 2024/4/21 21:31:00  
 Acq. Method: OD-5-90-0.7.M  
 Analysis Method: OD-5-90-0.7.M  
 Last changed: 2024/5/23 10:12:54

Location: P2-D3  
 Inj: 1 of 1  
 Inj Volume: 5.000  
 Acq. Operator: system

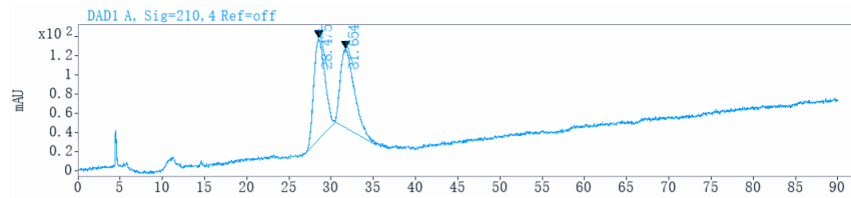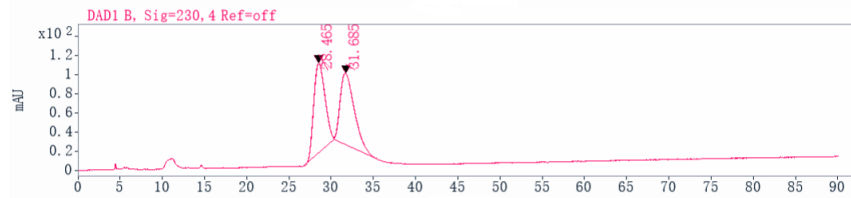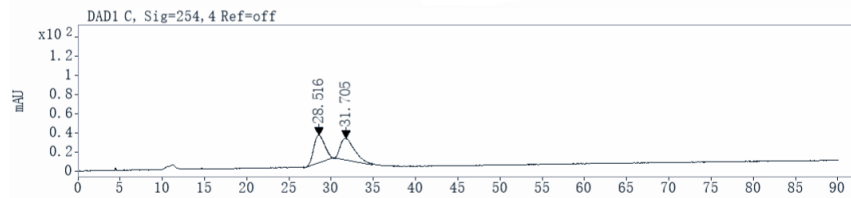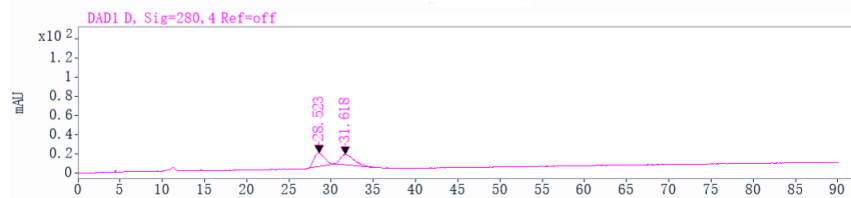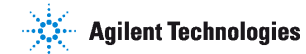

Signal: DAD1 A, Sig=210,4 Ref=off

| RetTime [min] | Type | Width [min] | Area [mAu*s] | Height [mAu\U] | Area% Name |
|---------------|------|-------------|--------------|----------------|------------|
| 28.475        | MM   | 1.5273      | 9731.0488    | 106.1928       | 50.0281    |
| 31.654        | MM   | 1.9600      | 9720.0996    | 82.6529        | 49.9719    |
| total         |      |             | 19451.1484   |                |            |

Signal: DAD1 B, Sig=230,4 Ref=off

| RetTime [min] | Type | Width [min] | Area [mAu*s] | Height [mAu\U] | Area% Name |
|---------------|------|-------------|--------------|----------------|------------|
| 28.465        | MM   | 1.5447      | 8741.8789    | 94.3233        | 49.5226    |
| 31.685        | MM   | 1.9732      | 8910.4336    | 75.2624        | 50.4774    |
| total         |      |             | 17652.3125   |                |            |

Signal: DAD1 C, Sig=254,4 Ref=off

| RetTime [min] | Type | Width [min] | Area [mAu*s] | Height [mAu\U] | Area% Name |
|---------------|------|-------------|--------------|----------------|------------|
| 28.516        | MM   | 1.5451      | 2711.8325    | 29.2517        | 49.8743    |
| 31.705        | MM   | 1.9865      | 2725.5056    | 22.8670        | 50.1257    |
| total         |      |             | 5437.3381    |                |            |

Signal: DAD1 D, Sig=280,4 Ref=off

| RetTime [min] | Type | Width [min] | Area [mAu*s] | Height [mAu\U] | Area% Name |
|---------------|------|-------------|--------------|----------------|------------|
| 28.523        | VB R | 1.0757      | 1311.5461    | 14.4124        | 49.6466    |
| 31.618        | MM   | 1.9547      | 1330.2175    | 11.3420        | 50.3534    |
| total         |      |             | 2641.7637    |                |            |

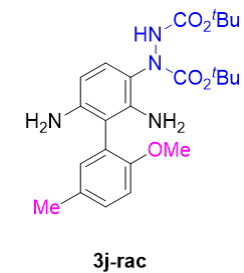



File of data: D:\ChemStation\2\Data\2024-1-7.S 2024-01-07 19-46-32\ZHH-7-12.D  
 Sample name: ZHH-7-12  
 Remarks: ZHH-7-12  
 Acq. instrument: LCT260  
 Injection date: 2024/1/7 21:23:23  
 Acq. Method: OD-5-90-0.7.M  
 Analysis Method: OD-5-90-0.7.M  
 Last changed: 2024/5/23 10:17:12

Location: P2-D5  
 Inj: 1 of 1  
 Inj Volume: 5.000  
 Acq. Operator: system

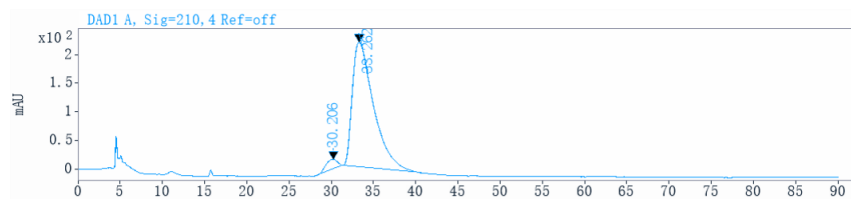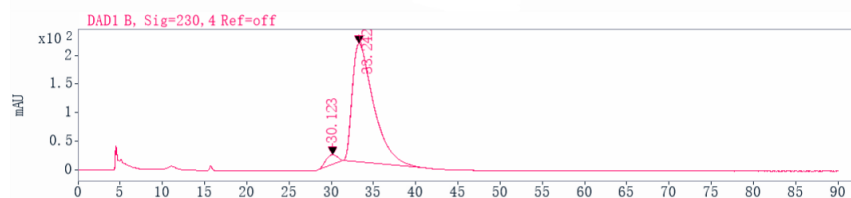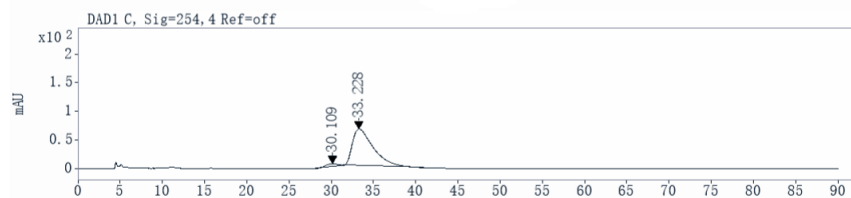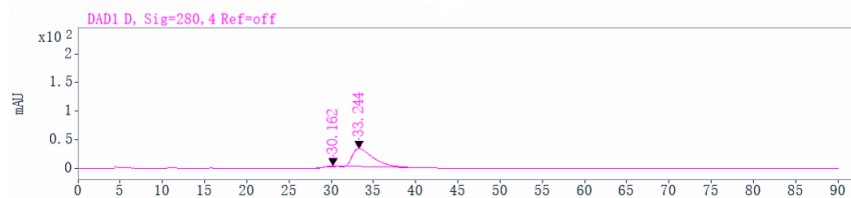

Signal: DAD1 A, Sig=210,4 Ref=off

| RetTime [min] | Type | Width [min] | Area [mAu*s] | Height [mAu\U] | Area%   | Name |
|---------------|------|-------------|--------------|----------------|---------|------|
| 30.206        | BB   | 1.1836      | 1733.7325    | 17.2644        | 4.3151  |      |
| 33.262        | BB   | 2.0705      | 38444.7031   | 218.7361       | 95.6849 |      |
|               |      |             | total        | 40178.4357     |         |      |

Signal: DAD1 B, Sig=230,4 Ref=off

| RetTime [min] | Type | Width [min] | Area [mAu*s] | Height [mAu\U] | Area%   | Name |
|---------------|------|-------------|--------------|----------------|---------|------|
| 30.123        | BB   | 1.1416      | 1638.8213    | 16.8960        | 4.2939  |      |
| 33.242        | BB   | 2.0867      | 36527.6172   | 207.2081       | 95.7061 |      |
|               |      |             | total        | 38166.4385     |         |      |

Signal: DAD1 C, Sig=254,4 Ref=off

| RetTime [min] | Type | Width [min] | Area [mAu*s] | Height [mAu\U] | Area%   | Name |
|---------------|------|-------------|--------------|----------------|---------|------|
| 30.109        | MM   | 1.1072      | 483.1847     | 5.1676         | 4.0875  |      |
| 33.228        | BB   | 2.0596      | 11337.8730   | 64.5380        | 95.9125 |      |
|               |      |             | total        | 11821.0578     |         |      |

Signal: DAD1 D, Sig=280,4 Ref=off

| RetTime [min] | Type | Width [min] | Area [mAu*s] | Height [mAu\U] | Area%   | Name |
|---------------|------|-------------|--------------|----------------|---------|------|
| 30.162        | MM   | 1.6597      | 261.1615     | 2.6226         | 4.4402  |      |
| 33.244        | BB   | 2.0621      | 5620.6123    | 32.1428        | 95.5598 |      |
|               |      |             | total        | 5881.7738      |         |      |

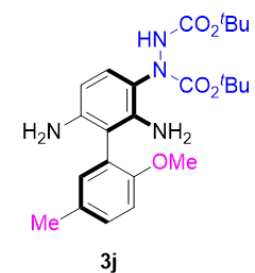

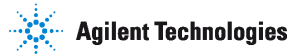

File of data: D:\ChemStation\2\Data\2023-12-28-1.S 2023-12-28 10-08-18\zh-7-11rac..D  
 Sample name: zhh-7-11rac.  
 Remarks: zhh-7-11rac.  
 Acq. instrument: LCI260  
 Injection date: 2023/12/30 1:17:59  
 Acq. Method: IC-10-120.M  
 Analysis Method: IC-10-120.M  
 Last changed: 2024/4/19 16:01:58

Location: P2-D2  
 Inj: 1 of 1  
 Inj Volume: 10.000  
 Acq. Operator: system

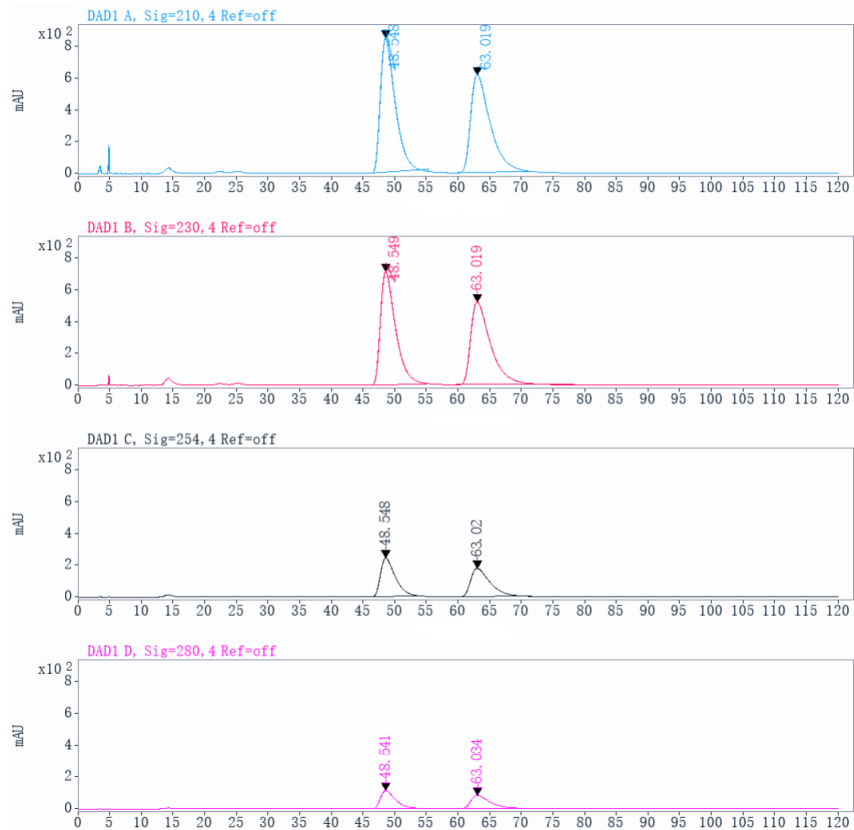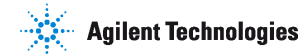

Signal: DAD1 A, Sig=210,4 Ref=off

| RetTime [min] | Type | Width [min] | Area [mAu*s] | Height [mAu\U] | Area% Name |
|---------------|------|-------------|--------------|----------------|------------|
| 48.548        | MM   | 2.7177      | 138186.7969  | 847.4438       | 50.8303    |
| 63.019        | BB   | 2.5497      | 133672.5625  | 615.0128       | 49.1697    |
| total         |      |             | 271859.3594  |                |            |

Signal: DAD1 B, Sig=230,4 Ref=off

| RetTime [min] | Type | Width [min] | Area [mAu*s] | Height [mAu\U] | Area% Name |
|---------------|------|-------------|--------------|----------------|------------|
| 48.549        | MM   | 2.7883      | 119779.3125  | 715.9684       | 50.8092    |
| 63.019        | BB   | 2.6224      | 115964.2109  | 521.4774       | 49.1908    |
| total         |      |             | 235743.5234  |                |            |

Signal: DAD1 C, Sig=254,4 Ref=off

| RetTime [min] | Type | Width [min] | Area [mAu*s] | Height [mAu\U] | Area% Name |
|---------------|------|-------------|--------------|----------------|------------|
| 48.548        | MM   | 2.7405      | 40368.5352   | 245.5076       | 50.2344    |
| 63.020        | MM   | 3.6839      | 39991.7734   | 180.9320       | 49.7656    |
| total         |      |             | 80360.3086   |                |            |

Signal: DAD1 D, Sig=280,4 Ref=off

| RetTime [min] | Type | Width [min] | Area [mAu*s] | Height [mAu\U] | Area% Name |
|---------------|------|-------------|--------------|----------------|------------|
| 48.541        | MM   | 2.2035      | 18924.1387   | 113.5999       | 49.2983    |
| 63.034        | MM   | 3.8583      | 19462.8984   | 84.0733        | 50.7017    |
| total         |      |             | 38387.0371   |                |            |

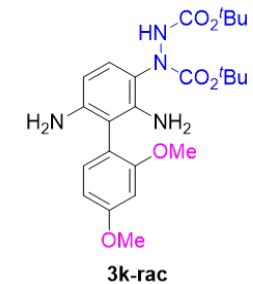



## Agilent Technologies

File of data: D:\ChemStation\2\Data\2023-12-28-1.S 2023-12-28 10-08-18\zhzh-7-11..D  
 Sample name: zhzh-7-11.  
 Remarks: zhzh-7-11.  
 Acq. instrument: LCI260  
 Injection date: 2023/12/30 3:19:33  
 Acq. Method: IC-10-120.M  
 Analysis Method: IC-10-120.M  
 Last changed: 2024/4/19 16:01:58

Location: P2-D3  
 Inj: 1 of 1  
 Inj Volume: 10.000  
 Acq. Operator: system

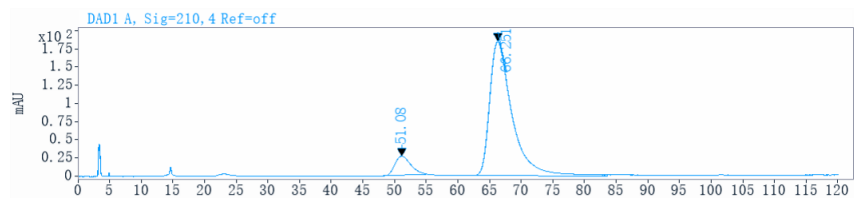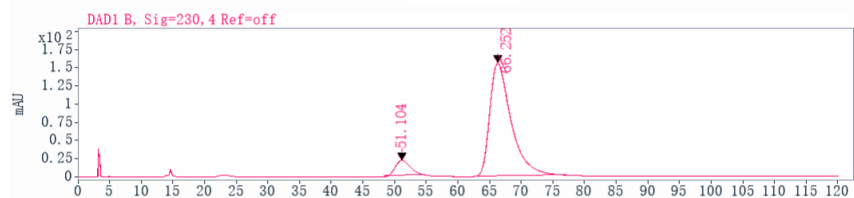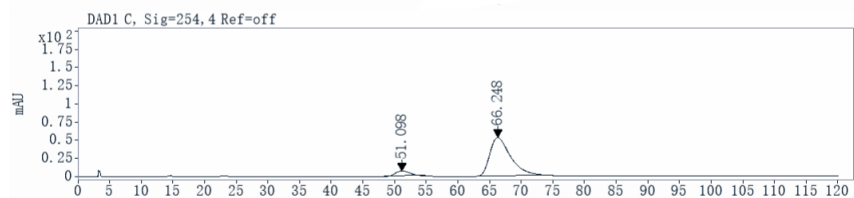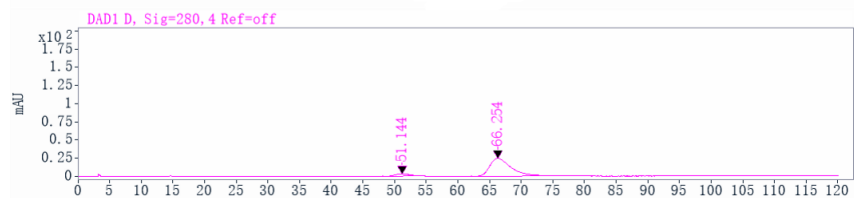

## Agilent Technologies

Signal: DAD1 A, Sig=210,4 Ref=off

| RetTime [min] | Type | Width [min] | Area [mAu*s] | Height [mAu\U] | Area% Name |
|---------------|------|-------------|--------------|----------------|------------|
| 51.080        | MM   | 2.9593      | 4702.9771    | 26.4866        | 9.2729     |
| 66.251        | MM   | 4.1393      | 46014.3672   | 185.2763       | 90.7271    |
| total         |      |             | 50717.3442   |                |            |

Signal: DAD1 B, Sig=230,4 Ref=off

| RetTime [min] | Type | Width [min] | Area [mAu*s] | Height [mAu\U] | Area% Name |
|---------------|------|-------------|--------------|----------------|------------|
| 51.104        | MM   | 2.7539      | 3441.0315    | 20.8252        | 8.5888     |
| 66.252        | BB   | 2.7709      | 36622.9492   | 155.6611       | 91.4112    |
| total         |      |             | 40063.9807   |                |            |

Signal: DAD1 C, Sig=254,4 Ref=off

| RetTime [min] | Type | Width [min] | Area [mAu*s] | Height [mAu\U] | Area% Name |
|---------------|------|-------------|--------------|----------------|------------|
| 51.098        | MM   | 2.6802      | 1130.6929    | 7.0312         | 8.5615     |
| 66.248        | BB   | 2.6824      | 12076.0508   | 52.7991        | 91.4385    |
| total         |      |             | 13206.7437   |                |            |

Signal: DAD1 D, Sig=280,4 Ref=off

| RetTime [min] | Type | Width [min] | Area [mAu*s] | Height [mAu\U] | Area% Name |
|---------------|------|-------------|--------------|----------------|------------|
| 51.144        | MM   | 2.9909      | 639.7615     | 3.5650         | 9.4610     |
| 66.254        | MM   | 4.0824      | 6122.3140    | 24.9949        | 90.5390    |
| total         |      |             | 6762.0755    |                |            |

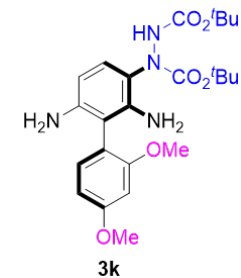



File of data: D:\ChemStation\2\Data\2023-12-12S 2023-12-12 08-47-15\ZH-6-76RAC.D  
 Sample name: ZHH-6-76RAC  
 Remarks: ZHH-6-76RAC  
 Acq. instrument: LC1260  
 Injection date: 2023/12/12 9:00:19  
 Acq. Method: IC-05-120.M  
 Analysis Method: IC-05-120.M  
 Last changed: 2024/4/19 15:52:39

Location: P2-D3  
 Inj: 1 of 1  
 Inj Volume: 15.000  
 Acq. Operator: system

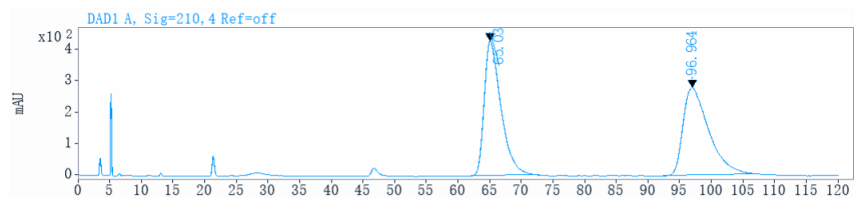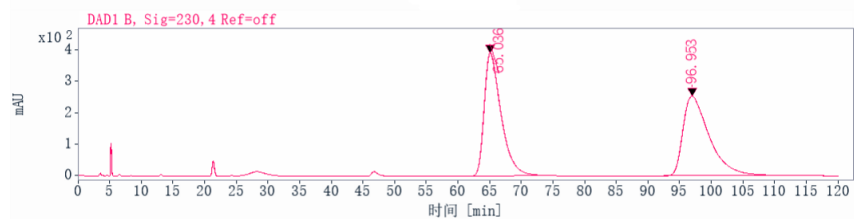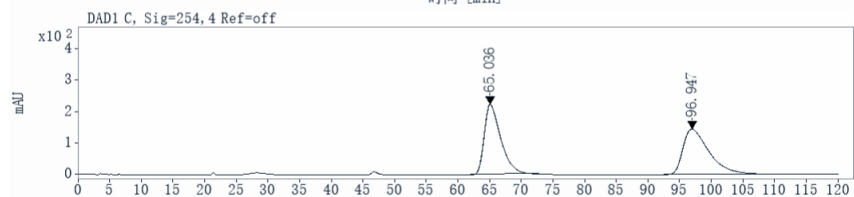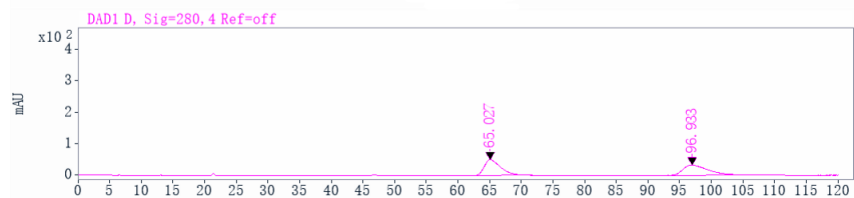

Signal: DAD1 A, Sig=210,4 Ref=off

| RetTime [min] | Type | Width [min] | Area [mAu*s] | Height [mAu\U] | Area% Name |
|---------------|------|-------------|--------------|----------------|------------|
| 65.036        | BB   | 2.3013      | 79754.5781   | 430.9198       | 50.0276    |
| 96.964        | BB   | 3.3442      | 79666.4531   | 281.1212       | 49.9724    |
| total         |      |             | 159421.0313  |                |            |

Signal: DAD1 B, Sig=230,4 Ref=off

| RetTime [min] | Type | Width [min] | Area [mAu*s] | Height [mAu\U] | Area% Name |
|---------------|------|-------------|--------------|----------------|------------|
| 65.036        | BB   | 2.4190      | 73270.0859   | 394.4712       | 49.8965    |
| 96.953        | BB   | 3.4350      | 73574.1484   | 255.6950       | 50.1035    |
| total         |      |             | 146844.2344  |                |            |

Signal: DAD1 C, Sig=254,4 Ref=off

| RetTime [min] | Type | Width [min] | Area [mAu*s] | Height [mAu\U] | Area% Name |
|---------------|------|-------------|--------------|----------------|------------|
| 65.036        | MM   | 3.0012      | 40333.7031   | 223.9860       | 49.0284    |
| 96.947        | BB   | 3.3831      | 41932.3320   | 145.9836       | 50.9716    |
| total         |      |             | 82266.0352   |                |            |

Signal: DAD1 D, Sig=280,4 Ref=off

| RetTime [min] | Type | Width [min] | Area [mAu*s] | Height [mAu\U] | Area% Name |
|---------------|------|-------------|--------------|----------------|------------|
| 65.027        | MM   | 3.0933      | 9443.1641    | 50.8791        | 49.6613    |
| 96.933        | MM   | 4.7486      | 9571.9697    | 33.5955        | 50.3387    |
| total         |      |             | 19015.1338   |                |            |

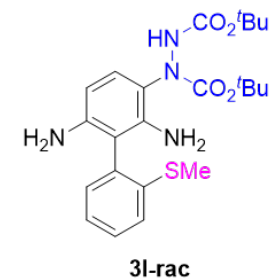





File of data: D:\ChemStation\2\Data\2023-12-12S 2023-12-12 08-47-15\ZHH-6-76.D  
 Sample name: ZHH-6-76  
 Remarks: ZHH-6-76  
 Acq. instrument: LCT260  
 Injection date: 2023/12/12 11:01:55  
 Acq. Method: IC-05-120.M  
 Analysis Method: IC-05-120.M  
 Last changed: 2024/4/19 15:52:39

Location: P2-D2  
 Inj: 1 of 1  
 Inj Volume: 15.000  
 Acq. Operator: system

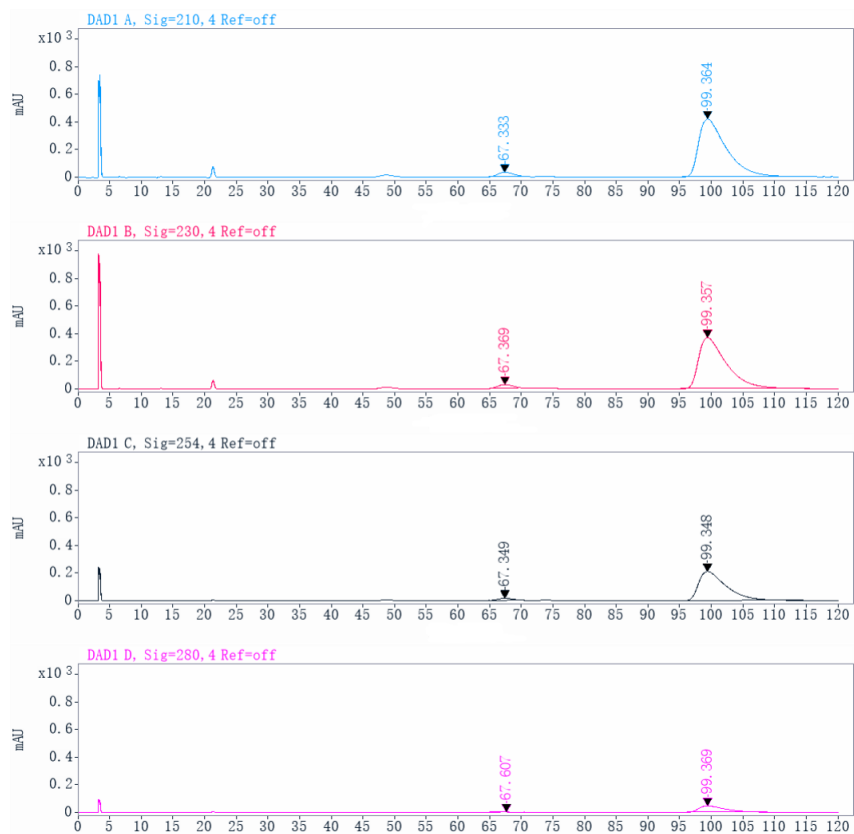

Signal: DAD1 A, Sig=210,4 Ref=off

| RetTime [min] | Type | Width [min] | Area [mAu*s] | Height [mAu\U] | Area% Name |
|---------------|------|-------------|--------------|----------------|------------|
| 67.333        | BB   | 2.1151      | 5989.8066    | 33.1965        | 4.4825     |
| 99.364        | BB   | 3.5592      | 127635.8047  | 420.9734       | 95.5175    |
| total         |      |             | 133625.6113  |                |            |

Signal: DAD1 B, Sig=230,4 Ref=off

| RetTime [min] | Type | Width [min] | Area [mAu*s] | Height [mAu\U] | Area% Name |
|---------------|------|-------------|--------------|----------------|------------|
| 67.369        | MM   | 2.7092      | 4540.6270    | 27.9334        | 3.8210     |
| 99.357        | BB   | 3.6584      | 114292.3203  | 371.5873       | 96.1790    |
| total         |      |             | 118832.9473  |                |            |

Signal: DAD1 C, Sig=254,4 Ref=off

| RetTime [min] | Type | Width [min] | Area [mAu*s] | Height [mAu\U] | Area% Name |
|---------------|------|-------------|--------------|----------------|------------|
| 67.349        | MM   | 3.0054      | 3098.4922    | 17.1831        | 4.5519     |
| 99.348        | BB   | 3.6578      | 64972.5000   | 211.9848       | 95.4481    |
| total         |      |             | 68070.9922   |                |            |

Signal: DAD1 D, Sig=280,4 Ref=off

| RetTime [min] | Type | Width [min] | Area [mAu*s] | Height [mAu\U] | Area% Name |
|---------------|------|-------------|--------------|----------------|------------|
| 67.607        | MM   | 3.1580      | 653.8228     | 3.4506         | 4.4022     |
| 99.369        | MM   | 5.0181      | 14198.3584   | 47.1576        | 95.5978    |
| total         |      |             | 14852.1812   |                |            |

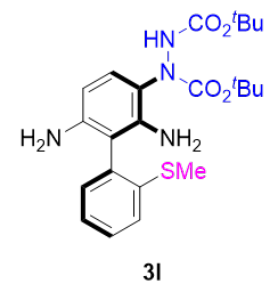



File of data: D:\ChemStation\2\Data\2023-11-30S 2023-11-30 10-06-33\ZHH-6-71...D  
 Sample name: ZHH-6-71..  
 Remarks: ZHH-6-71..  
 Acq. instrument: LC1260  
 Injection date: 2023/12/2 17:38:42  
 Acq. Method: IC-10-60.M  
 Analysis Method: IC-10-60.M  
 Last changed: 2024/4/19 15:44:50

Location: P2-D2  
 Inj: 1 of 1  
 Inj Volume: 5.000  
 Acq. Operator: system

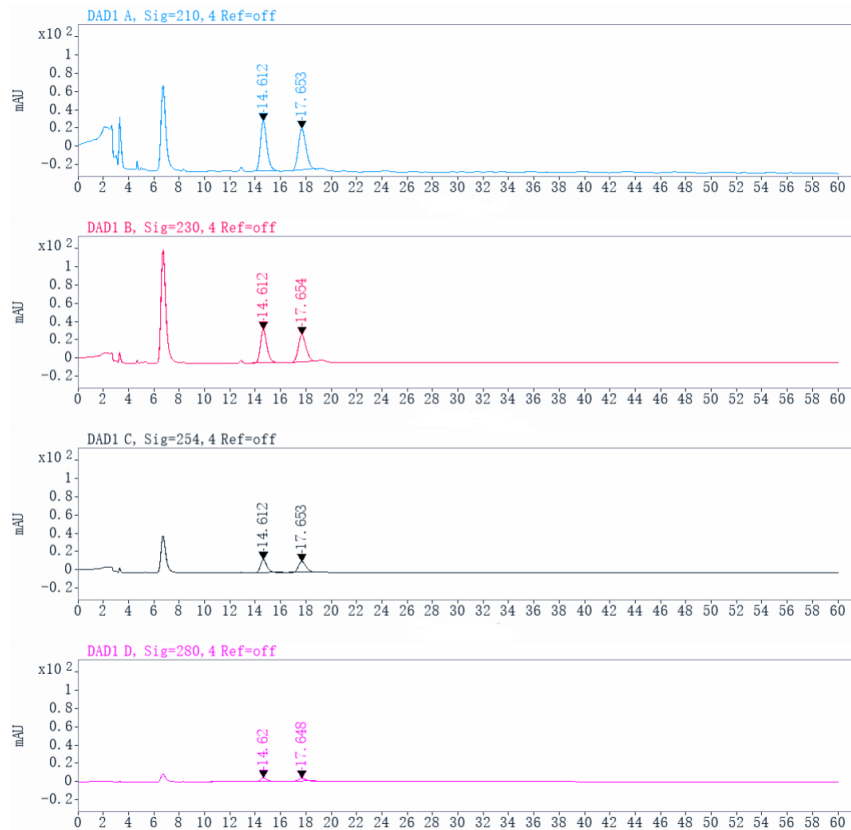

Signal: DAD1 A, Sig=210,4 Ref=off

| RetTime [min] | Type | Width [min] | Area [mAu*s] | Height [mAu\U] | Area% Name |
|---------------|------|-------------|--------------|----------------|------------|
| 14.612        | BB   | 0.5339      | 1986.5267    | 55.1966        | 50.4878    |
| 17.653        | BB   | 0.6507      | 1948.1393    | 45.5780        | 49.5122    |
| total         |      |             | 3934.6660    |                |            |

Signal: DAD1 B, Sig=230,4 Ref=off

| RetTime [min] | Type | Width [min] | Area [mAu*s] | Height [mAu\U] | Area% Name |
|---------------|------|-------------|--------------|----------------|------------|
| 14.612        | BB   | 0.5467      | 1326.5468    | 36.7872        | 50.9944    |
| 17.654        | BB   | 0.6425      | 1274.8115    | 29.9531        | 49.0056    |
| total         |      |             | 2601.3583    |                |            |

Signal: DAD1 C, Sig=254,4 Ref=off

| RetTime [min] | Type | Width [min] | Area [mAu*s] | Height [mAu\U] | Area% Name |
|---------------|------|-------------|--------------|----------------|------------|
| 14.612        | BB   | 0.5427      | 519.8206     | 14.4146        | 50.9012    |
| 17.653        | BB   | 0.6385      | 501.4132     | 11.7349        | 49.0988    |
| total         |      |             | 1021.2338    |                |            |

Signal: DAD1 D, Sig=280,4 Ref=off

| RetTime [min] | Type | Width [min] | Area [mAu*s] | Height [mAu\U] | Area% Name |
|---------------|------|-------------|--------------|----------------|------------|
| 14.620        | BB   | 0.4546      | 134.6392     | 3.8445         | 49.7416    |
| 17.648        | BB   | 0.5316      | 136.0380     | 3.1769         | 50.2584    |
| total         |      |             | 270.6772     |                |            |

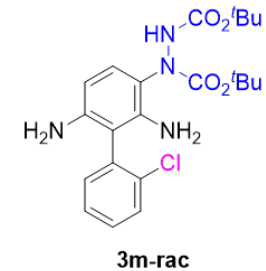

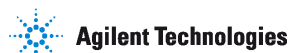

File of data: D:\ChemStation\2\Data\2023-11-30S 2023-11-30 10-06-33\ZHH-6-71.D  
 Sample name: ZHH-6-71  
 Remarks: ZHH-6-71  
 Acq. instrument: LC1260  
 Injection date: 2023/12/1 20:47:37  
 Acq. Method: IC-10-60.M  
 Analysis Method: IC-10-60.M  
 Last changed: 2024/4/19 15:44:50

Location: P2-D4  
 Inj: 1 of 1  
 Inj Volume: 5.000  
 Acq. Operator: system

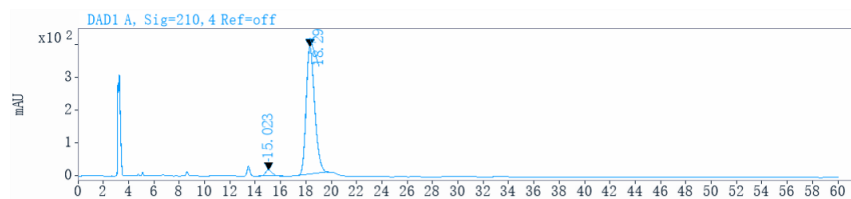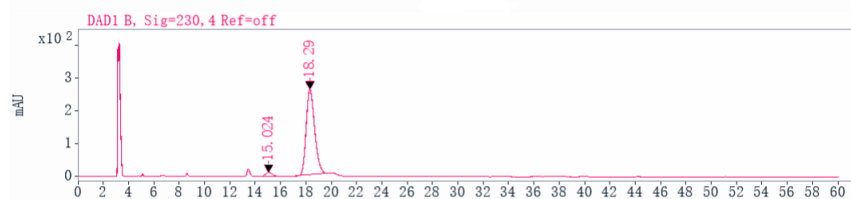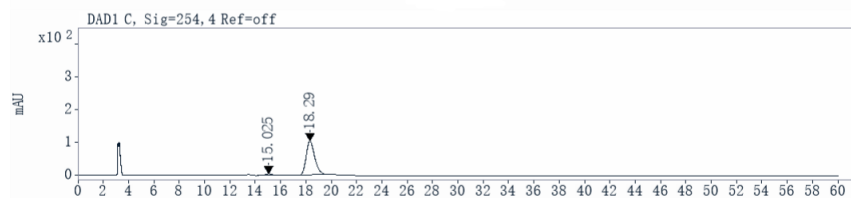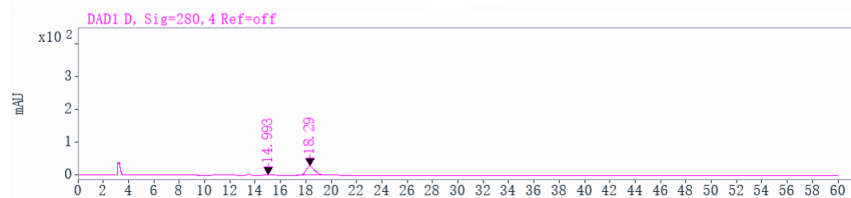

Signal: DAD1 A, Sig=210,4 Ref=off

| RetTime [min] | Type | Width [min] | Area [mAu*s] | Height [mAu\U] | Area% Name |
|---------------|------|-------------|--------------|----------------|------------|
| 15.023        | BB   | 0.5455      | 703.5992     | 18.4249        | 3.6862     |
| 18.290        | BB   | 0.7347      | 18383.8438   | 389.4431       | 96.3138    |
| total         |      |             | 19087.4429   |                |            |

Signal: DAD1 B, Sig=230,4 Ref=off

| RetTime [min] | Type | Width [min] | Area [mAu*s] | Height [mAu\U] | Area% Name |
|---------------|------|-------------|--------------|----------------|------------|
| 15.024        | BB   | 0.5957      | 507.1133     | 12.8138        | 3.9649     |
| 18.290        | BB   | 0.7221      | 12283.0508   | 262.4113       | 96.0351    |
| total         |      |             | 12790.1640   |                |            |

Signal: DAD1 C, Sig=254,4 Ref=off

| RetTime [min] | Type | Width [min] | Area [mAu*s] | Height [mAu\U] | Area% Name |
|---------------|------|-------------|--------------|----------------|------------|
| 15.025        | BB   | 0.5151      | 198.9117     | 5.0331         | 3.9313     |
| 18.290        | BB   | 0.7229      | 4860.7236    | 103.6833       | 96.0687    |
| total         |      |             | 5059.6353    |                |            |

Signal: DAD1 D, Sig=280,4 Ref=off

| RetTime [min] | Type | Width [min] | Area [mAu*s] | Height [mAu\U] | Area% Name |
|---------------|------|-------------|--------------|----------------|------------|
| 14.993        | MM   | 0.5777      | 43.7121      | 1.2612         | 3.2181     |
| 18.290        | BB   | 0.7132      | 1314.5948    | 27.9265        | 96.7819    |
| total         |      |             | 1358.3069    |                |            |

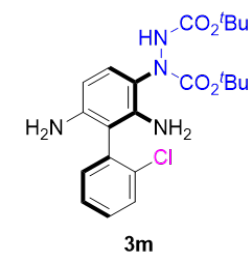



File of data: D:\ChemStation\2\Data\2023-12-22-1S 2023-12-24 18-31-00\ZHH-6-99RAC.D  
 Sample name: ZHH-6-99RAC  
 Remarks: ZHH-6-99RAC  
 Acq. instrument: LCT260  
 Injection date: 2023/12/24 18:44:11  
 Acq. Method: IC-05-120.M  
 Analysis Method: IC-05-120.M  
 Last changed: 2024/4/19 15:59:23

Location: P2-D4  
 Inj: 1 of 1  
 Inj Volume: 10.000  
 Acq. Operator: system

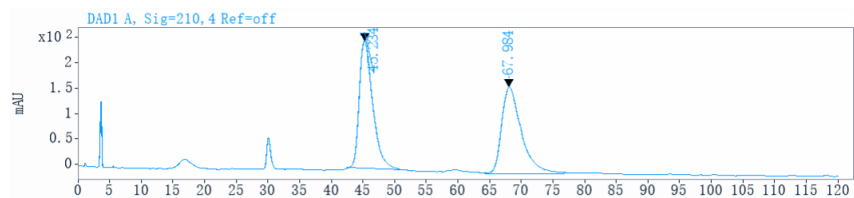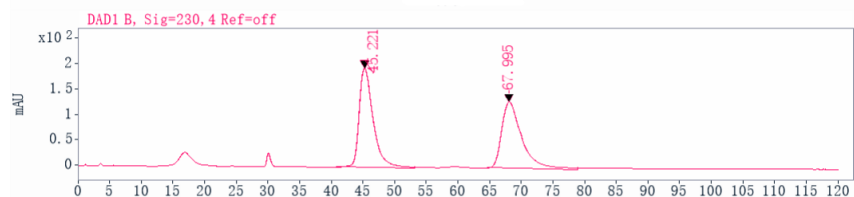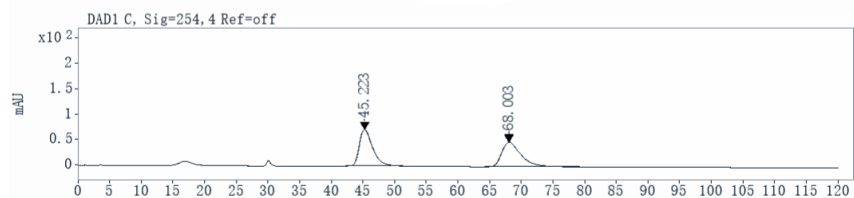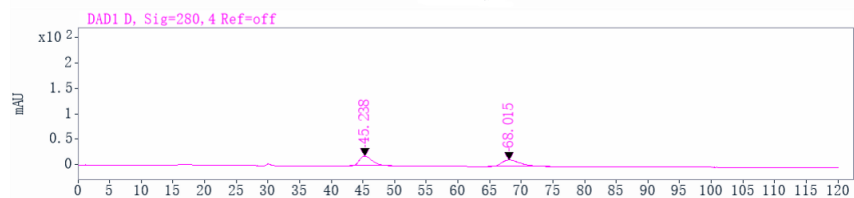

Signal: DAD1 A, Sig=210,4 Ref=off

| RetTime [min] | Type | Width [min] | Area [mAu*s] | Height [mAu\U] | Area% Name |
|---------------|------|-------------|--------------|----------------|------------|
| 45.234        | BB   | 1.7581      | 37590.5664   | 251.4481       | 49.9021    |
| 67.984        | MM   | 3.6642      | 37737.9883   | 171.6540       | 50.0979    |
| total         |      |             | 75328.5547   |                |            |

Signal: DAD1 B, Sig=230,4 Ref=off

| RetTime [min] | Type | Width [min] | Area [mAu*s] | Height [mAu\U] | Area% Name |
|---------------|------|-------------|--------------|----------------|------------|
| 45.221        | MM   | 2.6107      | 30645.0078   | 195.6375       | 50.8412    |
| 67.995        | MM   | 3.7555      | 29630.8730   | 131.4988       | 49.1588    |
| total         |      |             | 60275.8809   |                |            |

Signal: DAD1 C, Sig=254,4 Ref=off

| RetTime [min] | Type | Width [min] | Area [mAu*s] | Height [mAu\U] | Area% Name |
|---------------|------|-------------|--------------|----------------|------------|
| 45.223        | BB   | 1.8497      | 10611.7314   | 71.5756        | 49.9205    |
| 68.003        | MM   | 3.6409      | 10645.5166   | 48.7317        | 50.0795    |
| total         |      |             | 21257.2480   |                |            |

Signal: DAD1 D, Sig=280,4 Ref=off

| RetTime [min] | Type | Width [min] | Area [mAu*s] | Height [mAu\U] | Area% Name |
|---------------|------|-------------|--------------|----------------|------------|
| 45.238        | BB   | 1.6845      | 2767.2354    | 19.3260        | 50.5411    |
| 68.015        | MM   | 3.4356      | 2707.9875    | 13.1370        | 49.4589    |
| total         |      |             | 5475.2229    |                |            |

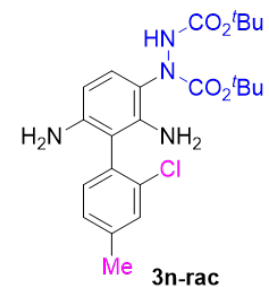



File of data: D:\ChemStation\2\Data\2023-12-22-1S 2023-12-24 18-31-00\ZHH-6-99.D  
 Sample name: ZHH-6-99  
 Remarks: ZHH-6-99  
 Acq. instrument: LCT260  
 Injection date: 2023/12/24 20:45:49  
 Acq. Method: IC-05-120.M  
 Analysis Method: IC-05-120.M  
 Last changed: 2024/4/19 15:59:23

Location: P2-D1  
 Inj: 1 of 1  
 Inj Volume: 10.000  
 Acq. Operator: system

fl t

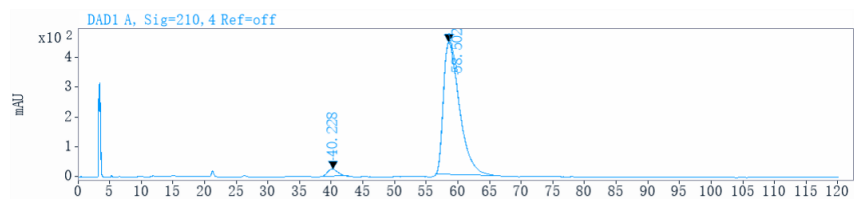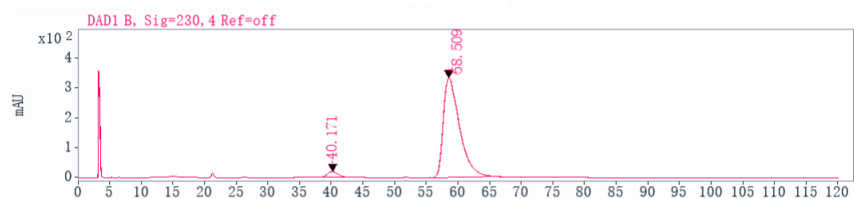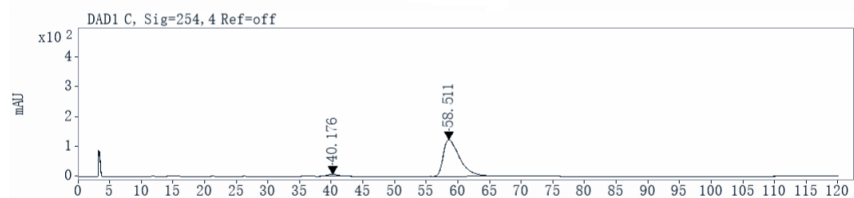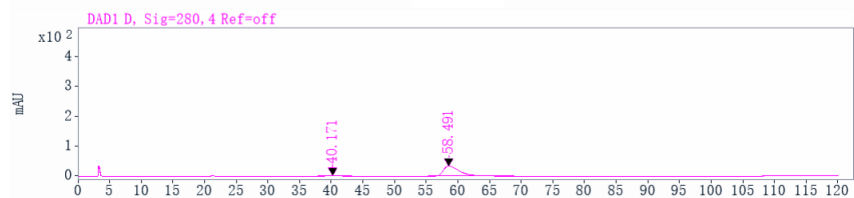

Signal: DAD1 A, Sig=210,4 Ref=off

| RetTime [min] | Type | Width [min] | Area [mAu*s] | Height [mAu\U] | Area% Name |
|---------------|------|-------------|--------------|----------------|------------|
| 40.228        | BB   | 1.3407      | 2931.8337    | 25.6655        | 3.6049     |
| 58.502        | BB   | 2.1359      | 78396.2344   | 444.0052       | 96.3951    |
|               |      |             | total        | 81328.0681     |            |

Signal: DAD1 B, Sig=230,4 Ref=off

| RetTime [min] | Type | Width [min] | Area [mAu*s] | Height [mAu\U] | Area% Name |
|---------------|------|-------------|--------------|----------------|------------|
| 40.171        | BB   | 1.4029      | 2286.4575    | 19.1788        | 3.6092     |
| 58.509        | MM   | 3.0389      | 61064.3320   | 334.9087       | 96.3908    |
|               |      |             | total        | 63350.7896     |            |

Signal: DAD1 C, Sig=254,4 Ref=off

| RetTime [min] | Type | Width [min] | Area [mAu*s] | Height [mAu\U] | Area% Name |
|---------------|------|-------------|--------------|----------------|------------|
| 40.176        | BB   | 1.3930      | 830.4508     | 7.0155         | 3.5194     |
| 58.511        | MM   | 3.0539      | 22766.2168   | 124.2479       | 96.4806    |
|               |      |             | total        | 23596.6676     |            |

Signal: DAD1 D, Sig=280,4 Ref=off

| RetTime [min] | Type | Width [min] | Area [mAu*s] | Height [mAu\U] | Area% Name |
|---------------|------|-------------|--------------|----------------|------------|
| 40.171        | MM   | 1.9639      | 228.4438     | 1.9387         | 3.4109     |
| 58.491        | MM   | 3.1648      | 6469.0840    | 34.0675        | 96.5891    |
|               |      |             | total        | 6697.5278      |            |

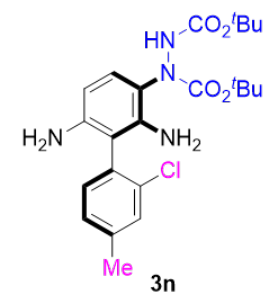



## Agilent Technologies

File of data: D:\ChemStation\2\Data\2023-12-10S 2023-12-10 19-23-54\ZHH-6-61-1.D  
 Sample name: ZHH-6-61-1  
 Remarks: ZHH-6-61-1  
 Acq. instrument: LC1260  
 Injection date: 2023/12/10 19:36:55  
 Acq. Method: OJ-05-90.M  
 Analysis Method: OJ-05-90.M  
 Last changed: 2024/6/18 16:32:29

Location: P2-D9  
 Inj: 1 of 1  
 Inj Volume: 20.000  
 Acq. Operator: system

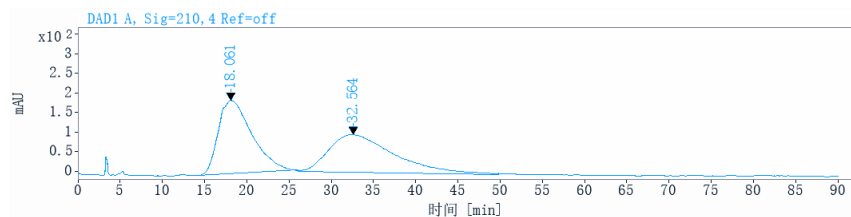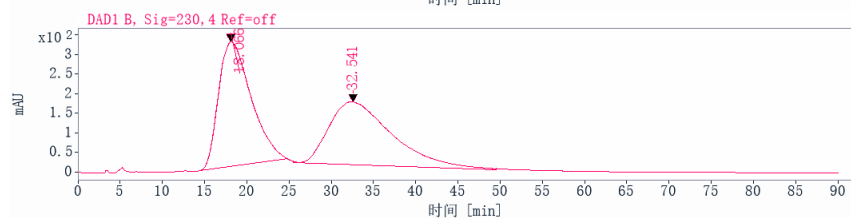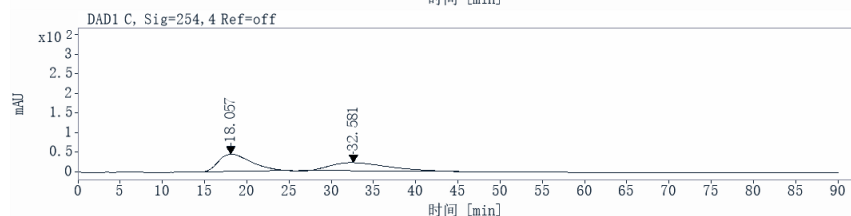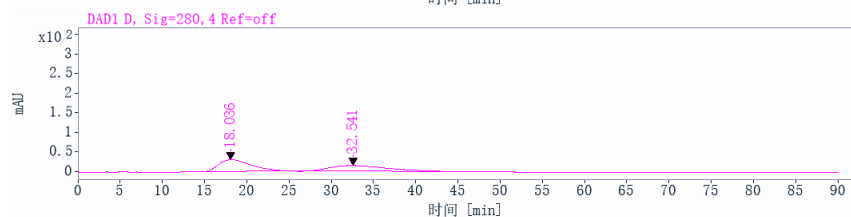

## Agilent Technologies

Signal: DAD1 A, Sig=210,4 Ref=off

| RetTime [min] | Type | Width [min] | Area [mAu*s] | Height [mAu\U] | Area% Name |
|---------------|------|-------------|--------------|----------------|------------|
| 18.061        | BB   | 3.257       | 52084.4492   | 187.2104       | 49.4376    |
| 32.564        | MM   | 9.117       | 53269.4141   | 97.3764        | 50.5624    |
| total         |      |             | 105353.8633  |                |            |

Signal: DAD1 B, Sig=230,4 Ref=off

| RetTime [min] | Type | Width [min] | Area [mAu*s] | Height [mAu\U] | Area% Name |
|---------------|------|-------------|--------------|----------------|------------|
| 18.066        | MM   | 4.4803      | 85608.0547   | 318.4602       | 50.5253    |
| 32.541        | MM   | 8.6989      | 83827.9375   | 160.6094       | 49.4747    |
| total         |      |             | 169435.9922  |                |            |

Signal: DAD1 C, Sig=254,4 Ref=off

| RetTime [min] | Type | Width [min] | Area [mAu*s] | Height [mAu\U] | Area% Name |
|---------------|------|-------------|--------------|----------------|------------|
| 18.057        | MM   | 4.5261      | 12068.7402   | 44.4413        | 50.9698    |
| 32.581        | MM   | 8.7217      | 11609.4600   | 22.1849        | 49.0302    |
| total         |      |             | 23678.2002   |                |            |

Signal: DAD1 D, Sig=280,4 Ref=off

| RetTime [min] | Type | Width [min] | Area [mAu*s] | Height [mAu\U] | Area% Name |
|---------------|------|-------------|--------------|----------------|------------|
| 18.036        | MM   | 4.5268      | 8223.4658    | 30.2772        | 51.5540    |
| 32.541        | MM   | 8.4749      | 7727.7104    | 15.1973        | 48.4460    |
| total         |      |             | 15951.1763   |                |            |

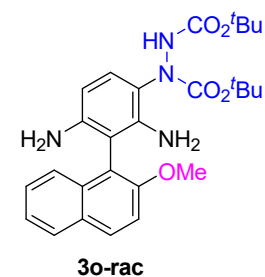



File of data: D:\ChemStation\2\Data\2023-12-10S 2023-12-10 19-23-54\ZHH-6-66.D  
 Sample name: ZHH-6-66  
 Remarks: ZHH-6-66  
 Acq. instrument: LC1260  
 Injection date: 2023/12/10 22:40:15  
 Acq. Method: OJ-05-90.M  
 Analysis Method: OJ-05-90.M  
 Last changed: 2024/6/18 16:32:29

Location: P2-D1  
 Inj: 1 of 1  
 Inj Volume: 10.000  
 Acq. Operator: system

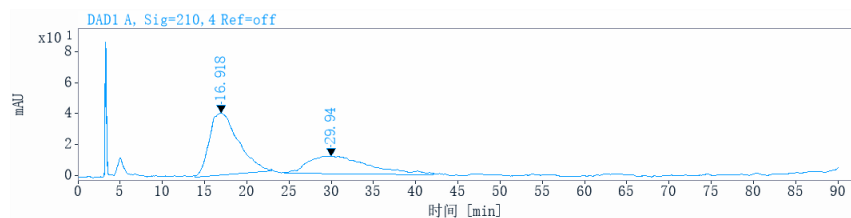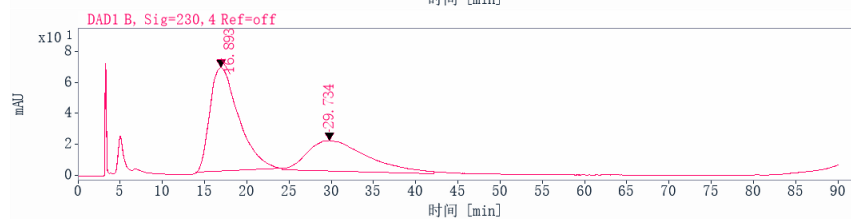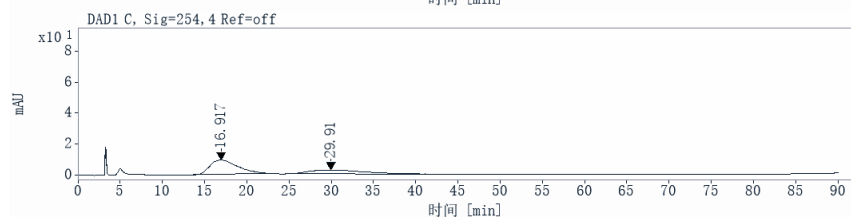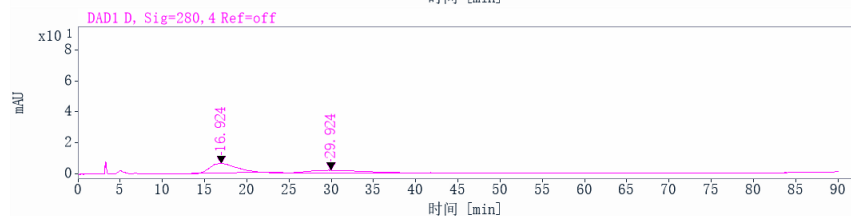

Signal: DAD1 A, Sig=210,4 Ref=off

| RetTime [min] | Type | Width [min] | Area [mAu*s] | Height [mAu\U] | Area% Name |
|---------------|------|-------------|--------------|----------------|------------|
| 16.918        | MM   | 4.014       | 9731.4873    | 40.4030        | 61.7921    |
| 29.940        | MM   | 8.633       | 6017.2603    | 11.6159        | 38.2079    |
| total         |      |             | 15748.7476   |                |            |

Signal: DAD1 B, Sig=230,4 Ref=off

| RetTime [min] | Type | Width [min] | Area [mAu*s] | Height [mAu\U] | Area% Name |
|---------------|------|-------------|--------------|----------------|------------|
| 16.893        | BB   | 2.7760      | 15950.6836   | 67.1802        | 61.2776    |
| 29.734        | MM   | 8.4510      | 10079.5264   | 19.8784        | 38.7224    |
| total         |      |             | 26030.2100   |                |            |

Signal: DAD1 C, Sig=254,4 Ref=off

| RetTime [min] | Type | Width [min] | Area [mAu*s] | Height [mAu\U] | Area% Name |
|---------------|------|-------------|--------------|----------------|------------|
| 16.917        | MM   | 3.9490      | 2227.1345    | 9.3995         | 62.5254    |
| 29.910        | MM   | 8.1370      | 1334.8340    | 2.7341         | 37.4746    |
| total         |      |             | 3561.9685    |                |            |

Signal: DAD1 D, Sig=280,4 Ref=off

| RetTime [min] | Type | Width [min] | Area [mAu*s] | Height [mAu\U] | Area% Name |
|---------------|------|-------------|--------------|----------------|------------|
| 16.924        | MM   | 3.9577      | 1521.5559    | 6.4075         | 61.2721    |
| 29.924        | MM   | 8.2520      | 961.7224     | 1.9424         | 38.7279    |
| total         |      |             | 2483.2783    |                |            |

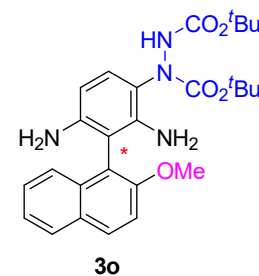

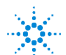

## Agilent Technologies

File of data: D:\ChemStation\2\Data\2023-12-21-1S 2023-12-21 09-35-47\zhh-6-90-2rac-ad.D  
 Sample name: zhh-6-90-2rac-ad.  
 Remarks: zhh-6-90-2rac-ad.  
 Acq. instrument: LC1260  
 Injection date: 2023/12/22 11:17:14  
 Acq. Method: AD-10-90.M  
 Analysis Method: AD-10-90.M  
 Last changed: 2024/4/19 19:40:22

Location: P2-D3  
 Inj: 1 of 1  
 Inj Volume: 10.000  
 Acq. Operator: system

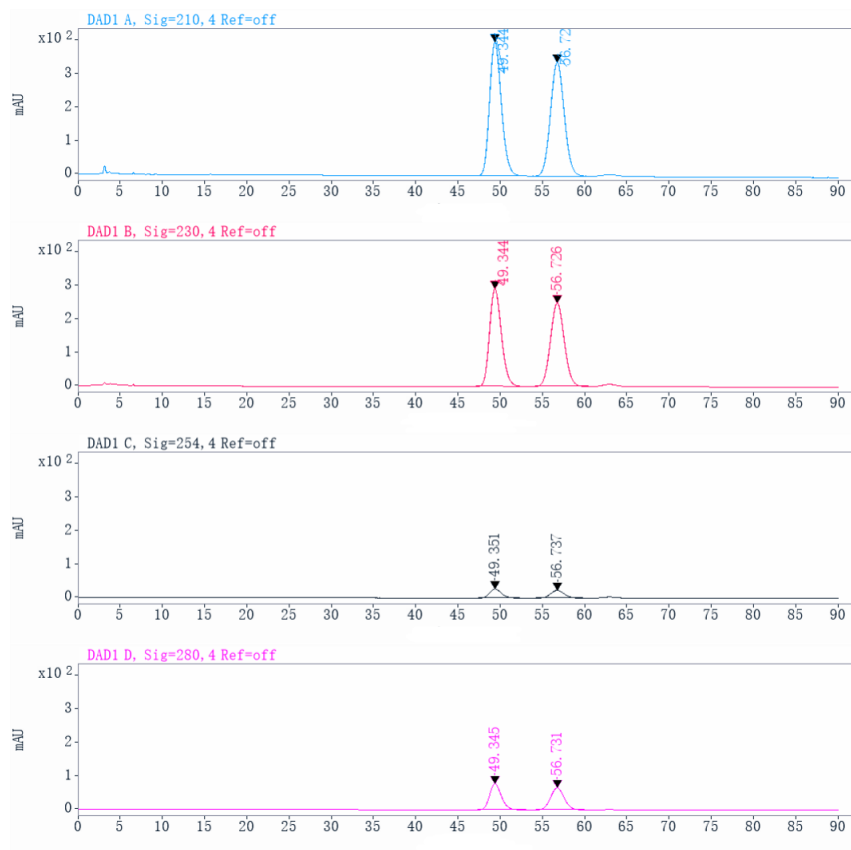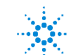

## Agilent Technologies

Signal: DAD1 A, Sig=210,4 Ref=off

| RetTime [min] | Type | Width [min] | Area [mAu*s] | Height [mAu\U] | Area% Name |
|---------------|------|-------------|--------------|----------------|------------|
| 49.344        | BB   | 1.4458      | 39063.1602   | 399.1439       | 49.7018    |
| 56.720        | MM   | 1.9312      | 39531.8945   | 341.1658       | 50.2982    |
|               |      | total       | 78595.0547   |                |            |

Signal: DAD1 B, Sig=230,4 Ref=off

| RetTime [min] | Type | Width [min] | Area [mAu*s] | Height [mAu\U] | Area% Name |
|---------------|------|-------------|--------------|----------------|------------|
| 49.344        | BB   | 1.4912      | 28651.5469   | 291.8799       | 50.2036    |
| 56.726        | MM   | 1.9026      | 28419.1719   | 248.9500       | 49.7964    |
|               |      | total       | 57070.7188   |                |            |

Signal: DAD1 C, Sig=254,4 Ref=off

| RetTime [min] | Type | Width [min] | Area [mAu*s] | Height [mAu\U] | Area% Name |
|---------------|------|-------------|--------------|----------------|------------|
| 49.351        | BB   | 1.1635      | 2631.6499    | 27.1834        | 50.1176    |
| 56.737        | BB   | 1.3349      | 2619.3032    | 23.1345        | 49.8824    |
|               |      | total       | 5250.9531    |                |            |

Signal: DAD1 D, Sig=280,4 Ref=off

| RetTime [min] | Type | Width [min] | Area [mAu*s] | Height [mAu\U] | Area% Name |
|---------------|------|-------------|--------------|----------------|------------|
| 49.345        | BB   | 1.3857      | 7538.1050    | 77.5699        | 50.2782    |
| 56.731        | BB   | 1.5641      | 7454.6816    | 65.8802        | 49.7218    |
|               |      | total       | 14992.7866   |                |            |

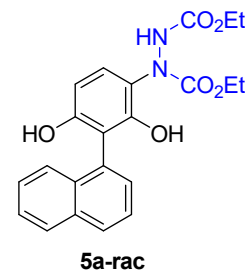



## Data Report

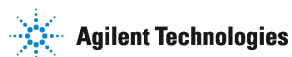

File of data: D:\ChemStation\2\Data\2024-1-5\_S 2024-01-05 09-16-48\zh-7-16.D  
 Sample name: zh-7-16  
 Remarks: zh-7-16  
 Acq. instrument: LCT260  
 Injection date: 2024/1/5 10:01:07  
 Acq. Method: AD-10-90.M  
 Analysis Method: AD-10-90.M  
 Last changed: 2024/4/19 19:42:30

Location: P2-D1  
 Inj: 1 of 1  
 Inj Volume: 10.000  
 Acq. Operator: system

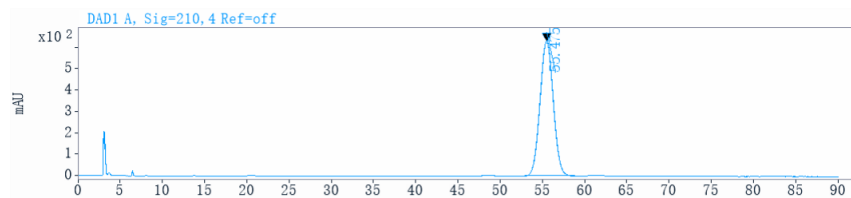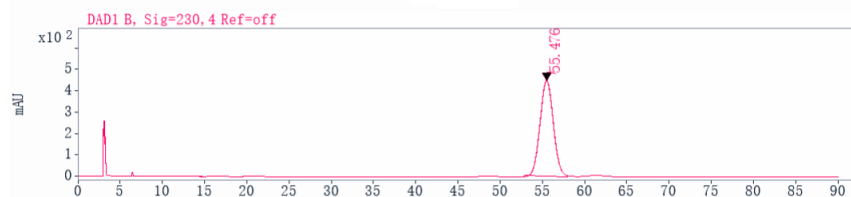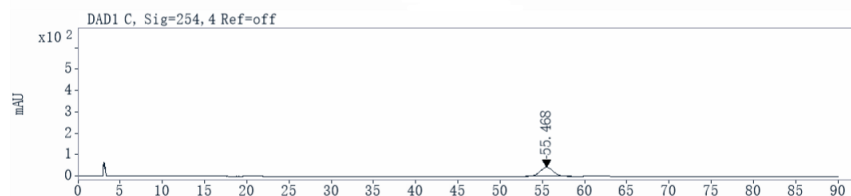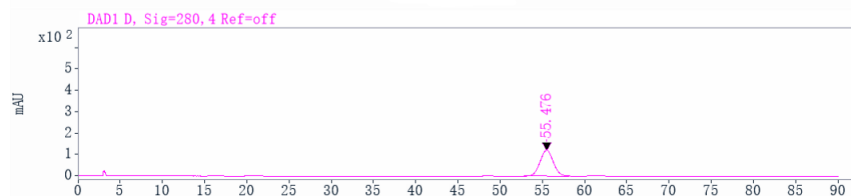

## Data Report

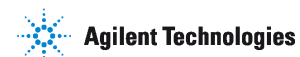

| Signal                    | RetTime [min] | Type | Width [min] | Area [mAu*s] | Height [mAu] | Area% Name |
|---------------------------|---------------|------|-------------|--------------|--------------|------------|
| DAD1 A, Sig=210,4 Ref=off | 55.475        | BB   | 1.3435      | 69490.4844   | 632.6445     | 100.0000   |
|                           |               |      | total       | 69490.4844   |              |            |
| DAD1 B, Sig=230,4 Ref=off | 55.476        | MM   | 1.8327      | 49337.4492   | 448.6786     | 100.0000   |
|                           |               |      | total       | 49337.4492   |              |            |
| DAD1 C, Sig=254,4 Ref=off | 55.468        | BB   | 1.3242      | 4605.5723    | 42.3021      | 100.0000   |
|                           |               |      | total       | 4605.5723    |              |            |
| DAD1 D, Sig=280,4 Ref=off | 55.476        | MM   | 1.8423      | 13506.1318   | 122.1831     | 100.0000   |
|                           |               |      | total       | 13506.1318   |              |            |

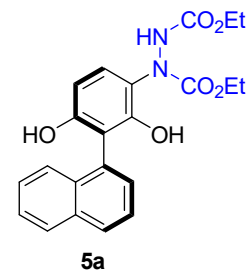



File of data: D:\ChemStation\2\Data\2024-1-13.S 2024-01-13 08-51-23\ZHH-7-22RAC.D  
 Sample name: ZHH-7-22RAC  
 Remarks: ZHH-7-22RAC  
 Acq. instrument: LCT260  
 Injection date: 2024/1/13 23:02:44  
 Acq. Method: AD-07-150.M  
 Analysis Method: AD-07-150.M  
 Last changed: 2024/4/19 19:46:10

Location: P2-D1  
 Inj: 1 of 1  
 Inj Volume: 5.000  
 Acq. Operator: system

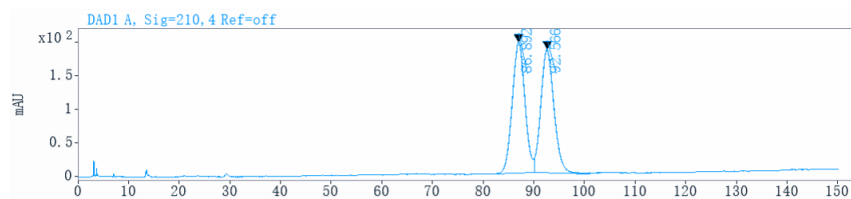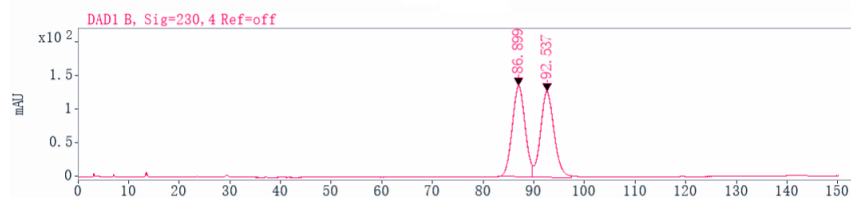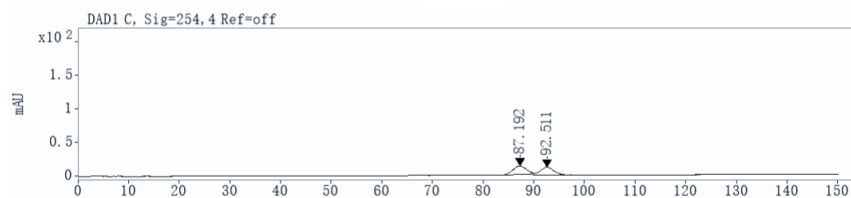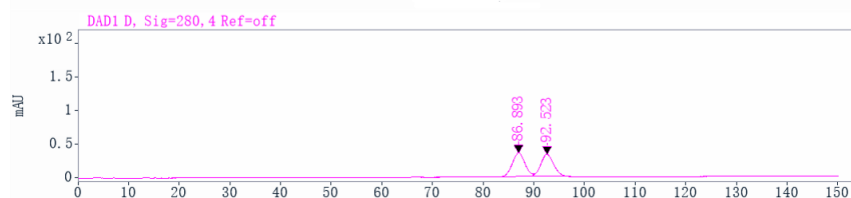

Signal: DAD1 A, Sig=210,4 Ref=off

| RetTime [min] | Type | Width [min] | Area [mAu*s] | Height [mAu\U] | Area% Name |
|---------------|------|-------------|--------------|----------------|------------|
| 86.892        | MM   | 2.9237      | 34117.5039   | 194.4860       | 50.4049    |
| 92.566        | MM   | 3.0388      | 33569.3633   | 184.1159       | 49.5951    |
|               |      |             | total        | 67686.8672     |            |

Signal: DAD1 B, Sig=230,4 Ref=off

| RetTime [min] | Type | Width [min] | Area [mAu*s] | Height [mAu\U] | Area% Name |
|---------------|------|-------------|--------------|----------------|------------|
| 86.899        | MF   | 2.9260      | 23779.7871   | 135.4492       | 50.0681    |
| 92.537        | FM   | 3.0890      | 23715.1406   | 127.9568       | 49.9319    |
|               |      |             | total        | 47494.9277     |            |

Signal: DAD1 C, Sig=254,4 Ref=off

| RetTime [min] | Type | Width [min] | Area [mAu*s] | Height [mAu\U] | Area% Name |
|---------------|------|-------------|--------------|----------------|------------|
| 87.192        | MM   | 3.1688      | 2600.8237    | 13.6794        | 49.8496    |
| 92.511        | MM   | 3.4417      | 2616.5205    | 12.6706        | 50.1504    |
|               |      |             | total        | 5217.3442      |            |

Signal: DAD1 D, Sig=280,4 Ref=off

| RetTime [min] | Type | Width [min] | Area [mAu*s] | Height [mAu\U] | Area% Name |
|---------------|------|-------------|--------------|----------------|------------|
| 86.893        | MM   | 2.9240      | 6266.1274    | 35.7164        | 50.9164    |
| 92.523        | MM   | 3.0019      | 6040.5762    | 33.5377        | 49.0836    |
|               |      |             | total        | 12306.7036     |            |

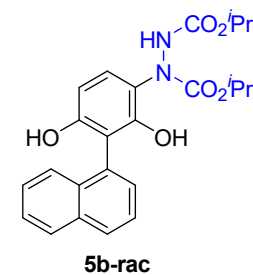



File of data: D:\ChemStation\2\Data\2024-1-13.S 2024-01-13 08-51-23\ZHH-7-22.D  
 Sample name: ZHH-7-22  
 Remarks: ZHH-7-22  
 Acq. instrument: LCT260  
 Injection date: 2024/1/14 1:34:21  
 Acq. Method: AD-07-150.M  
 Analysis Method: AD-07-150.M  
 Last changed: 2024/4/19 19:46:10

Location: P2-D2  
 Inj: 1 of 1  
 Inj Volume: 5.000  
 Acq. Operator: system

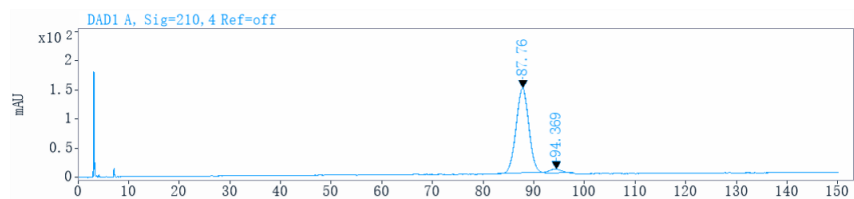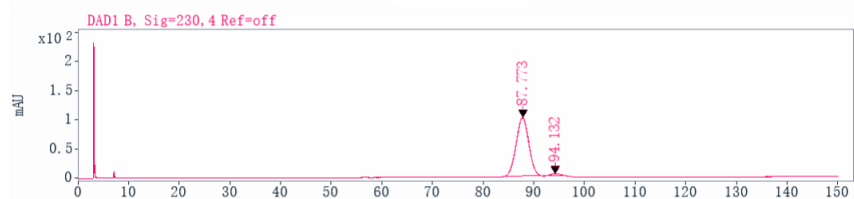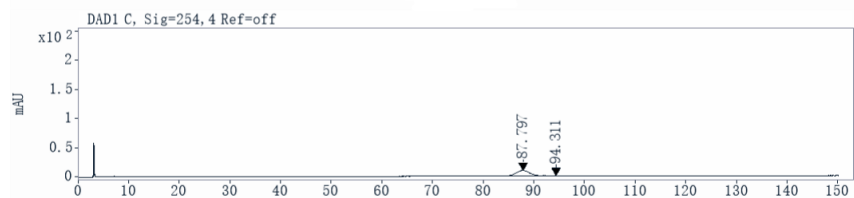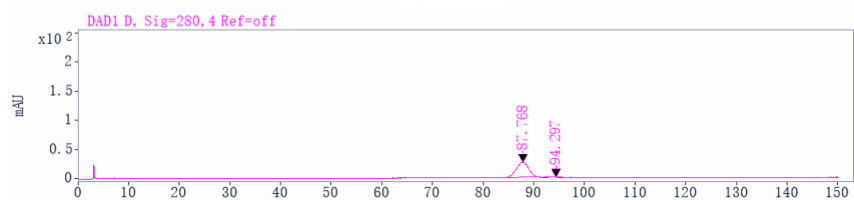

Signal: DAD1 A, Sig=210,4 Ref=off

| RetTime [min] | Type | Width [min] | Area [mAu*s] | Height [mAu\U] | Area% Name |
|---------------|------|-------------|--------------|----------------|------------|
| 87.760        | MM   | 2.9357      | 25894.0469   | 147.0064       | 95.0376    |
| 94.369        | MM   | 2.9668      | 1352.0702    | 7.5955         | 4.9624     |
|               |      |             | total        | 27246.1171     |            |

Signal: DAD1 B, Sig=230,4 Ref=off

| RetTime [min] | Type | Width [min] | Area [mAu*s] | Height [mAu\U] | Area% Name |
|---------------|------|-------------|--------------|----------------|------------|
| 87.773        | MM   | 2.9078      | 17618.0098   | 100.9800       | 96.4403    |
| 94.132        | MM   | 2.5765      | 650.2895     | 4.2065         | 3.5597     |
|               |      |             | total        | 18268.2993     |            |

Signal: DAD1 C, Sig=254,4 Ref=off

| RetTime [min] | Type | Width [min] | Area [mAu*s] | Height [mAu\U] | Area% Name |
|---------------|------|-------------|--------------|----------------|------------|
| 87.797        | MM   | 3.2838      | 1959.5110    | 9.9453         | 95.0971    |
| 94.311        | MM   | 3.0713      | 101.0259     | 0.5482         | 4.9029     |
|               |      |             | total        | 2060.5369      |            |

Signal: DAD1 D, Sig=280,4 Ref=off

| RetTime [min] | Type | Width [min] | Area [mAu*s] | Height [mAu\U] | Area% Name |
|---------------|------|-------------|--------------|----------------|------------|
| 87.768        | MM   | 2.9189      | 4691.8330    | 26.7899        | 94.7966    |
| 94.297        | MM   | 3.0744      | 257.5377     | 1.3961         | 5.2034     |
|               |      |             | total        | 4949.3707      |            |

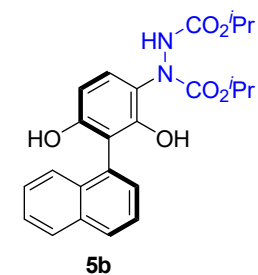



File of data: D:\ChemStation\2\Data\2024-3-6.S 2024-03-06 09-22-01\ZHH-7-45.D  
 Sample name: ZHH-7-45  
 Remarks: ZHH-7-45  
 Acq. instrument: LC1260  
 Injection date: 2024/3/6 9:35:41  
 Acq. Method: AD-10-80.M  
 Analysis Method: AD-10-80.M  
 Last changed: 2024/4/19 20:17:36

Location: P2-D1  
 Inj: 1 of 1  
 Inj Volume: 10.000  
 Acq. Operator: system

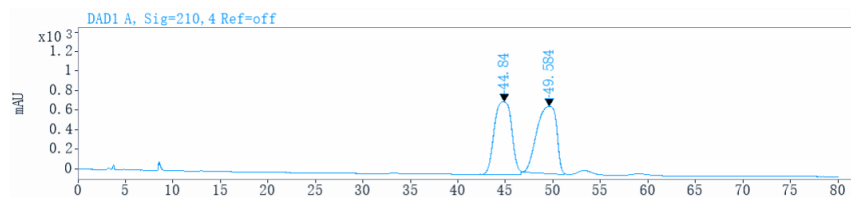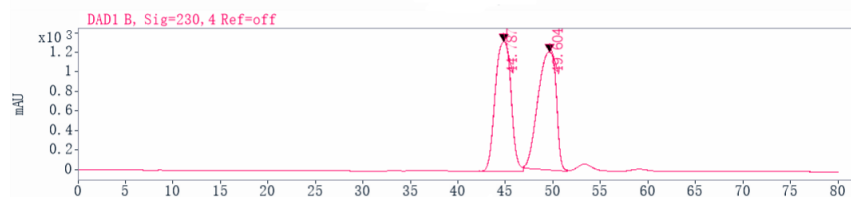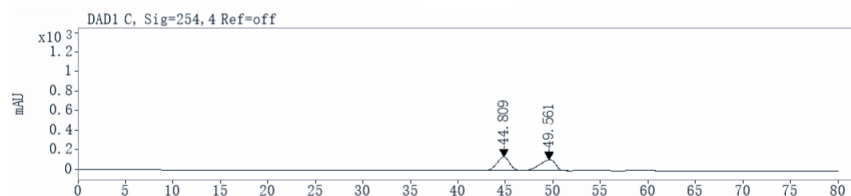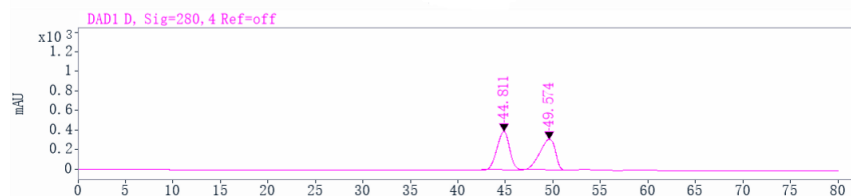

Signal: DAD1 A, Sig=210,4 Ref=off

| RetTime [min] | Type | Width [min] | Area [mAu*s] | Height [mAu\U] | Area% Name |
|---------------|------|-------------|--------------|----------------|------------|
| 44.840        | MM   | 2.1428      | 97033.4922   | 754.7181       | 49.2429    |
| 49.584        | MM   | 2.4105      | 100017.3125  | 691.5530       | 50.7571    |
|               |      |             | total        | 197050.8047    |            |

Signal: DAD1 B, Sig=230,4 Ref=off

| RetTime [min] | Type | Width [min] | Area [mAu*s] | Height [mAu\U] | Area% Name |
|---------------|------|-------------|--------------|----------------|------------|
| 44.787        | MM   | 1.9557      | 156492.1719  | 1333.6127      | 49.0435    |
| 49.604        | MM   | 2.2328      | 162596.4531  | 1213.7189      | 50.9565    |
|               |      |             | total        | 319088.6250    |            |

Signal: DAD1 C, Sig=254,4 Ref=off

| RetTime [min] | Type | Width [min] | Area [mAu*s] | Height [mAu\U] | Area% Name |
|---------------|------|-------------|--------------|----------------|------------|
| 44.809        | BB   | 1.2356      | 12803.7275   | 139.1301       | 50.3978    |
| 49.561        | BB   | 1.3774      | 12601.5908   | 110.2591       | 49.6022    |
|               |      |             | total        | 25405.3184     |            |

Signal: DAD1 D, Sig=280,4 Ref=off

| RetTime [min] | Type | Width [min] | Area [mAu*s] | Height [mAu\U] | Area% Name |
|---------------|------|-------------|--------------|----------------|------------|
| 44.811        | MM   | 1.5604      | 37397.7461   | 399.4380       | 50.8110    |
| 49.574        | BB   | 1.3632      | 36203.8672   | 314.4516       | 49.1890    |
|               |      |             | total        | 73601.6133     |            |

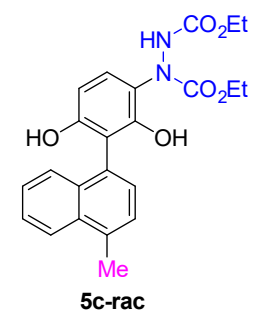



File of data: D:\ChemStation\2\Data\2024-3-11.S 2024-03-11 09-20-04\ZHH-7-45.D  
 Sample name: ZHH-7-45  
 Remarks: ZHH-7-45  
 Acq. instrument: LCT260  
 Injection date: 2024/3/11 9:33:12  
 Acq. Method: AD-10-80.M  
 Analysis Method: AD-10-80.M  
 Last changed: 2024/4/19 20:18:48

Location: P2-D1  
 Inj: 1 of 1  
 Inj Volume: 10.000  
 Acq. Operator: system

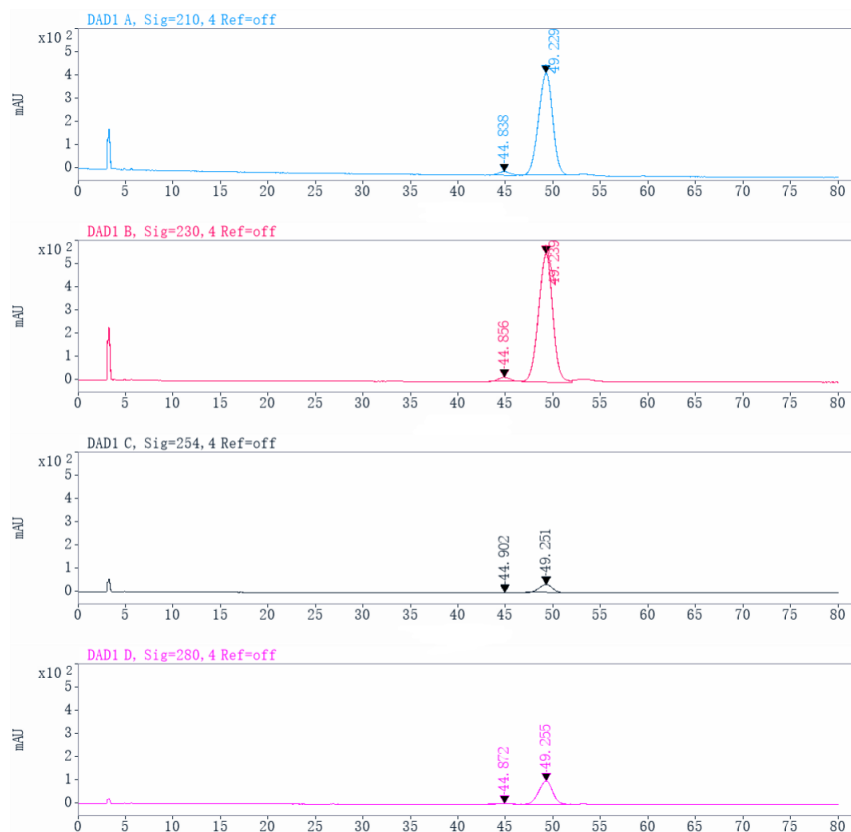

Signal: DAD1 A, Sig=210, 4 Ref=off

| RetTime [min] | Type | Width [min] | Area [mAu*s] | Height [mAu\U] | Area% Name |
|---------------|------|-------------|--------------|----------------|------------|
| 44.838        | MM   | 1.4706      | 1396.8158    | 15.8302        | 2.9444     |
| 49.229        | VV R | 1.2337      | 46042.1367   | 441.0091       | 97.0556    |
|               |      |             | total        | 47438.9525     |            |

Signal: DAD1 B, Sig=230, 4 Ref=off

| RetTime [min] | Type | Width [min] | Area [mAu*s] | Height [mAu\U] | Area% Name |
|---------------|------|-------------|--------------|----------------|------------|
| 44.856        | BB   | 1.0353      | 1566.5199    | 17.9303        | 2.5932     |
| 49.239        | MM   | 1.7626      | 58842.7383   | 556.4053       | 97.4068    |
|               |      |             | total        | 60409.2582     |            |

Signal: DAD1 C, Sig=254, 4 Ref=off

| RetTime [min] | Type | Width [min] | Area [mAu*s] | Height [mAu\U] | Area% Name |
|---------------|------|-------------|--------------|----------------|------------|
| 44.902        | MM   | 1.4479      | 112.5444     | 1.2954         | 3.0835     |
| 49.251        | BB   | 1.1814      | 3537.3013    | 35.1698        | 96.9165    |
|               |      |             | total        | 3649.8456      |            |

Signal: DAD1 D, Sig=280, 4 Ref=off

| RetTime [min] | Type | Width [min] | Area [mAu*s] | Height [mAu\U] | Area% Name |
|---------------|------|-------------|--------------|----------------|------------|
| 44.872        | MM   | 1.4817      | 304.0199     | 3.4197         | 2.7076     |
| 49.255        | MM   | 1.7714      | 10924.4961   | 102.7865       | 97.2924    |
|               |      |             | total        | 11228.5160     |            |

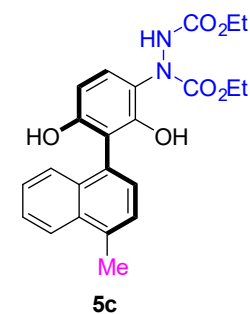

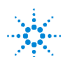

## Agilent Technologies

File of data: D:\ChemStation\2\Data\2024-2-1.S 2024-02-01 21-42-16\ZHH-7-47RAC.D  
 Sample name: ZHH-7-47RAC  
 Remarks: ZHH-7-47RAC  
 Acq. instrument: LC1260  
 Injection date: 2024/2/3 2:56:11  
 Acq. Method: AD-10-80.M  
 Analysis Method: AD-10-80.M  
 Last changed: 2024/4/19 20:24:52

Location: P2-D1  
 Inj: 1 of 1  
 Inj Volume: 10.000  
 Acq. Operator: system

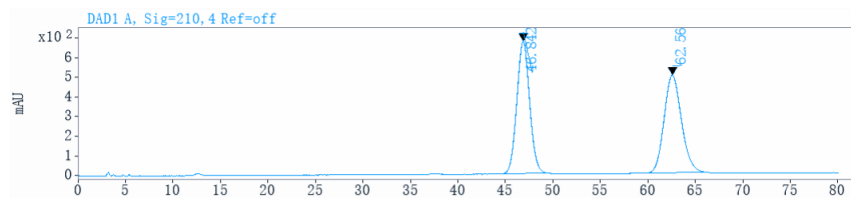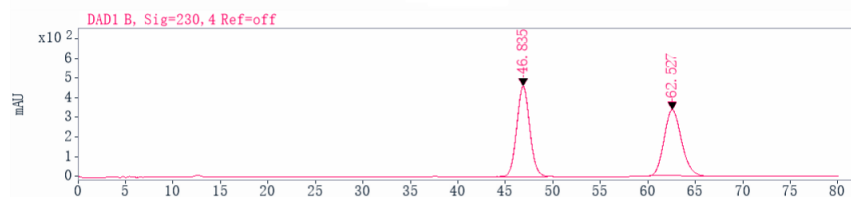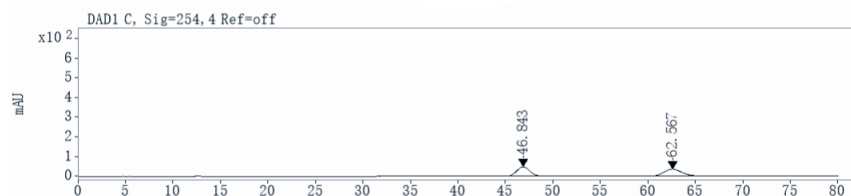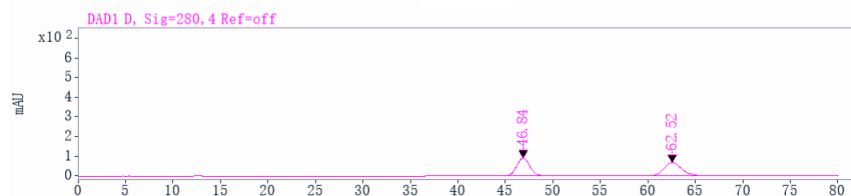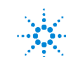

## Agilent Technologies

Signal: DAD1 A, Sig=210,4 Ref=off

| RetTime [min] | Type | Width [min] | Area [mAu*s] | Height [mAu\U] | Area% Name |
|---------------|------|-------------|--------------|----------------|------------|
| 46.842        | VV R | 1.1096      | 63531.1250   | 675.1975       | 49.9594    |
| 62.560        | VV R | 1.5040      | 63634.3047   | 498.2023       | 50.0406    |
| total         |      |             | 127165.4297  |                |            |

Signal: DAD1 B, Sig=230,4 Ref=off

| RetTime [min] | Type | Width [min] | Area [mAu*s] | Height [mAu\U] | Area% Name |
|---------------|------|-------------|--------------|----------------|------------|
| 46.835        | MM   | 1.6143      | 44944.1563   | 464.0257       | 50.9598    |
| 62.527        | BB   | 1.5228      | 43251.1953   | 337.5643       | 49.0402    |
| total         |      |             | 88195.3516   |                |            |

Signal: DAD1 C, Sig=254,4 Ref=off

| RetTime [min] | Type | Width [min] | Area [mAu*s] | Height [mAu\U] | Area% Name |
|---------------|------|-------------|--------------|----------------|------------|
| 46.843        | BB   | 1.1173      | 4513.7104    | 47.6433        | 49.0840    |
| 62.567        | MM   | 2.1954      | 4682.1733    | 35.5450        | 50.9160    |
| total         |      |             | 9195.8838    |                |            |

Signal: DAD1 D, Sig=280,4 Ref=off

| RetTime [min] | Type | Width [min] | Area [mAu*s] | Height [mAu\U] | Area% Name |
|---------------|------|-------------|--------------|----------------|------------|
| 46.840        | BB   | 1.2268      | 8651.3516    | 91.1915        | 49.5239    |
| 62.520        | MM   | 2.1697      | 8817.6904    | 67.7327        | 50.4761    |
| total         |      |             | 17469.0420   |                |            |

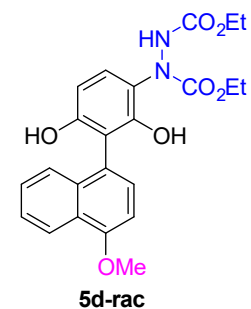



File of data: D:\ChemStation\2\Data\2024-2-29.S 2024-02-29 13-48-57\ZHH-7-47.D  
 Sample name: ZHH-7-47  
 Remarks: ZHH-7-47  
 Acq. instrument: LCI260  
 Injection date: 2024/3/2 4:45:26  
 Acq. Method: AD-10-80.M  
 Analysis Method: AD-10-80.M  
 Last changed: 2024/4/19 20:26:28

Location: P2-D4  
 Inj: 1 of 1  
 Inj Volume: 5.000  
 Acq. Operator: system

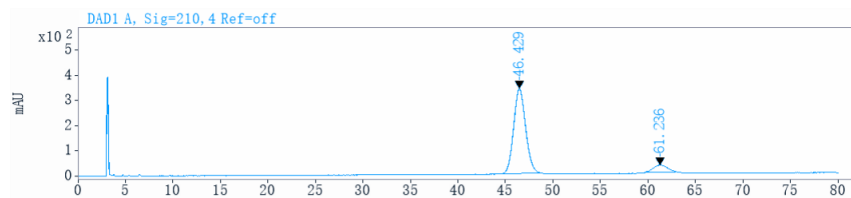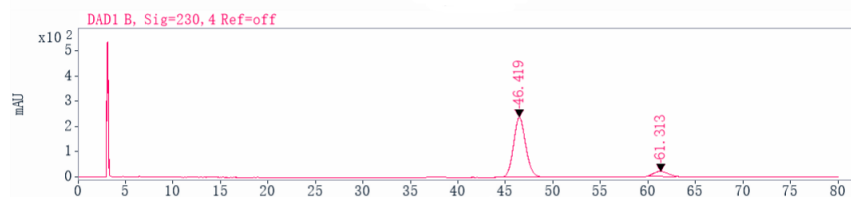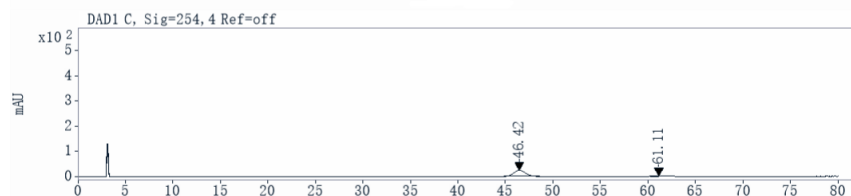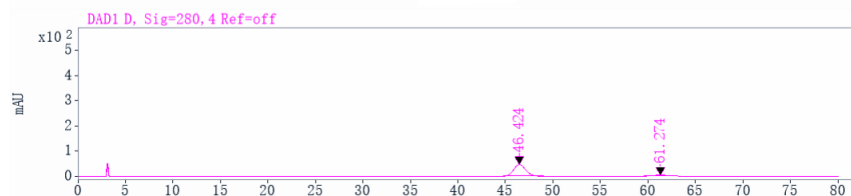

Signal: DAD1 A, Sig=210,4 Ref=off

| RetTime [min] | Type | Width [min] | Area [mAu*s] | Height [mAu\U] | Area%   | Name |
|---------------|------|-------------|--------------|----------------|---------|------|
| 46.429        | W R  | 1.0398      | 29817.6211   | 338.3798       | 89.8253 |      |
| 61.236        | MM   | 1.8296      | 3377.4924    | 30.7670        | 10.1747 |      |
|               |      |             | total        | 33195.1135     |         |      |

Signal: DAD1 B, Sig=230,4 Ref=off

| RetTime [min] | Type | Width [min] | Area [mAu*s] | Height [mAu\U] | Area%   | Name |
|---------------|------|-------------|--------------|----------------|---------|------|
| 46.419        | BB   | 1.1731      | 21047.4199   | 237.6933       | 89.6399 |      |
| 61.313        | MM   | 1.8720      | 2432.5396    | 21.6569        | 10.3601 |      |
|               |      |             | total        | 23479.9595     |         |      |

Signal: DAD1 C, Sig=254,4 Ref=off

| RetTime [min] | Type | Width [min] | Area [mAu*s] | Height [mAu\U] | Area%   | Name |
|---------------|------|-------------|--------------|----------------|---------|------|
| 46.420        | BB   | 1.0238      | 2123.7124    | 24.4880        | 89.1252 |      |
| 61.110        | MM   | 1.4418      | 259.1294     | 2.9955         | 10.8748 |      |
|               |      |             | total        | 2382.8418      |         |      |

Signal: DAD1 D, Sig=280,4 Ref=off

| RetTime [min] | Type | Width [min] | Area [mAu*s] | Height [mAu\U] | Area%   | Name |
|---------------|------|-------------|--------------|----------------|---------|------|
| 46.424        | BB   | 1.1003      | 4113.0078    | 46.9387        | 90.8795 |      |
| 61.274        | MM   | 1.7198      | 412.7733     | 4.0001         | 9.1205  |      |
|               |      |             | total        | 4525.7811      |         |      |

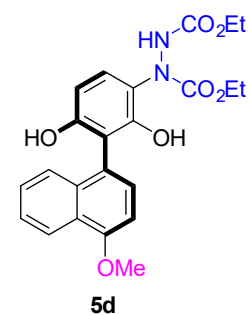



File of data: D:\ChemStation\2\Data\2024-1-20\_S 2024-01-20 16-14-10\ZHH-7-34RAC.D  
 Sample name: ZHH-7-34RAC  
 Remarks: ZHH-7-34RAC  
 Acq. instrument: LC1260  
 Injection date: 2024/1/21 7:57:38  
 Acq. Method: AD-10-90.M  
 Analysis Method: AD-10-90.M  
 Last changed: 2024/4/19 20:06:12

Location: P2-D4  
 Inj: 1 of 1  
 Inj Volume: 15.000  
 Acq. Operator: system

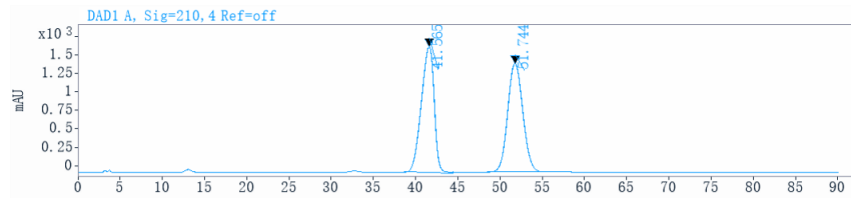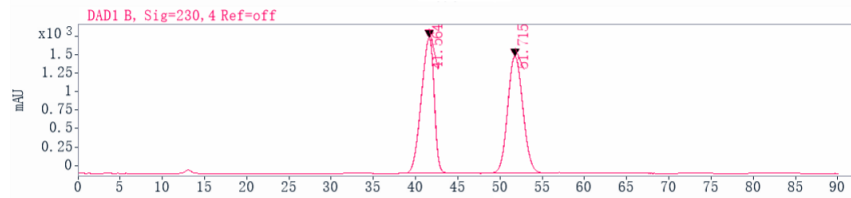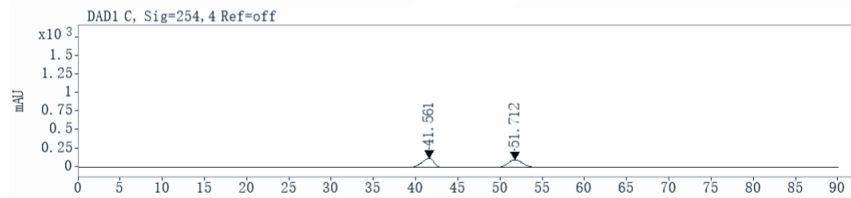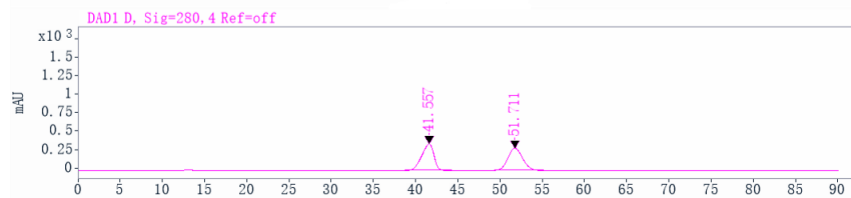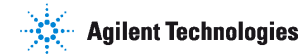

Signal: DAD1 A, Sig=210,4 Ref=off

| RetTime [min] | Type | Width [min] | Area [mAu*s] | Height [mAu\U] | Area% Name |
|---------------|------|-------------|--------------|----------------|------------|
| 41.565        | MM   | 1.7706      | 182073.1094  | 1713.8578      | 49.7324    |
| 51.744        | BB   | 1.4687      | 184032.6563  | 1473.9001      | 50.2676    |
| total         |      |             | 366105.7656  |                |            |

Signal: DAD1 B, Sig=230,4 Ref=off

| RetTime [min] | Type | Width [min] | Area [mAu*s] | Height [mAu\U] | Area% Name |
|---------------|------|-------------|--------------|----------------|------------|
| 41.564        | BB   | 1.2575      | 194746.4375  | 1835.9313      | 49.4130    |
| 51.715        | BB   | 1.4957      | 199373.0156  | 1582.6094      | 50.5870    |
| total         |      |             | 394119.4531  |                |            |

Signal: DAD1 C, Sig=254,4 Ref=off

| RetTime [min] | Type | Width [min] | Area [mAu*s] | Height [mAu\U] | Area% Name |
|---------------|------|-------------|--------------|----------------|------------|
| 41.561        | MM   | 1.8031      | 14093.4492   | 130.2720       | 50.8654    |
| 51.712        | MM   | 2.1022      | 13613.8887   | 107.9358       | 49.1346    |
| total         |      |             | 27707.3379   |                |            |

Signal: DAD1 D, Sig=280,4 Ref=off

| RetTime [min] | Type | Width [min] | Area [mAu*s] | Height [mAu\U] | Area% Name |
|---------------|------|-------------|--------------|----------------|------------|
| 41.557        | BB   | 1.4994      | 36490.6758   | 362.1837       | 50.2190    |
| 51.711        | BB   | 1.6928      | 36172.3984   | 299.1236       | 49.7810    |
| total         |      |             | 72663.0742   |                |            |

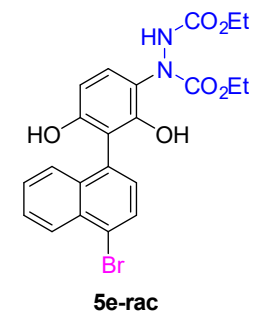





File of data: D:\ChemStation\2\Data\2024-1-22.S 2024-01-22 09-19-40\ZHH-7-34.D  
 Sample name: ZHH-7-34  
 Remarks: ZHH-7-34  
 Acq. instrument: LCT1260  
 Injection date: 2024/1/23 2:11:50  
 Acq. Method: AD-10-90.M  
 Analysis Method: AD-10-90.M  
 Last changed: 2024/4/19 20:08:41

Location: P2-D5  
 Inj: 1 of 1  
 Inj Volume: 5.000  
 Acq. Operator: system

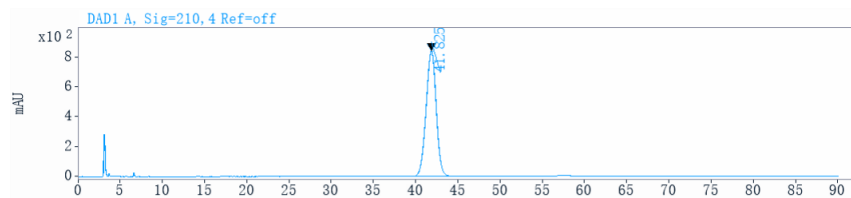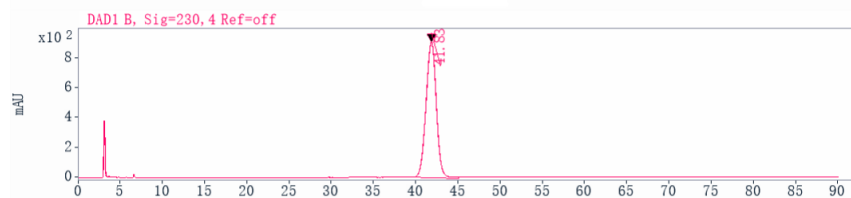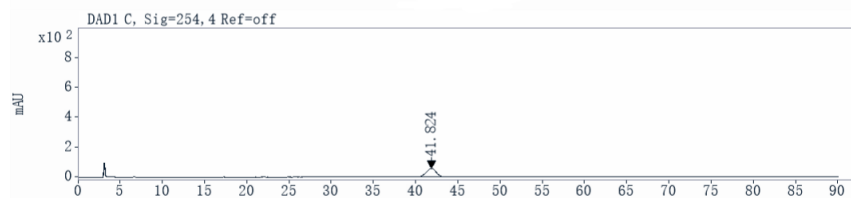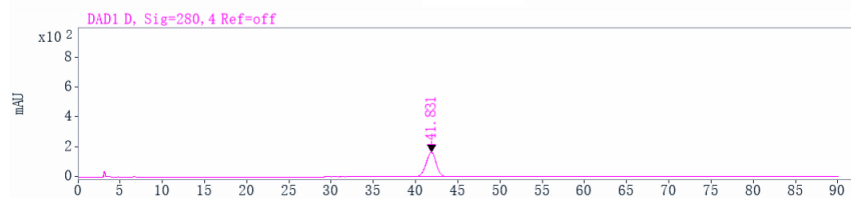

Signal: DAD1 A, Sig=210,4 Ref=off

| RetTime [min] | Type | Width [min] | Area [mAu*s]     | Height [mAu\U] | Area% Name |
|---------------|------|-------------|------------------|----------------|------------|
| 41.825        | MM   |             | 70930.0859       | 842.5616       | 100.0000   |
|               |      |             | total 70930.0859 |                |            |

Signal: DAD1 B, Sig=230,4 Ref=off

| RetTime [min] | Type | Width [min] | Area [mAu*s]     | Height [mAu\U] | Area% Name |
|---------------|------|-------------|------------------|----------------|------------|
| 41.830        | MM   |             | 78825.1094       | 913.1198       | 100.0000   |
|               |      |             | total 78825.1094 |                |            |

Signal: DAD1 C, Sig=254,4 Ref=off

| RetTime [min] | Type | Width [min] | Area [mAu*s]    | Height [mAu\U] | Area% Name |
|---------------|------|-------------|-----------------|----------------|------------|
| 41.824        | BB   |             | 4823.1133       | 57.9894        | 100.0000   |
|               |      |             | total 4823.1133 |                |            |

Signal: DAD1 D, Sig=280,4 Ref=off

| RetTime [min] | Type | Width [min] | Area [mAu*s]     | Height [mAu\U] | Area% Name |
|---------------|------|-------------|------------------|----------------|------------|
| 41.831        | BB   |             | 13639.6572       | 163.9008       | 100.0000   |
|               |      |             | total 13639.6572 |                |            |

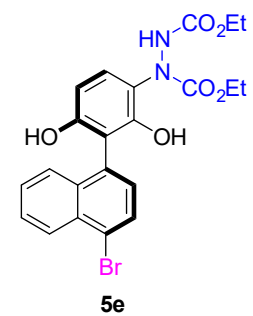



File of data: D:\ChemStation\2\Data\2024-1-24\_S 2024-01-24 08-39-15\ZHH-7-33RAC, ... D  
 Sample name: ZHH-7-33RAC, .  
 Remarks: ZHH-7-33RAC, .  
 Acq. instrument: LCT1260  
 Injection date: 2024/1/26 1:56:26  
 Acq. Method: AD-10-120.M  
 Analysis Method: AD-10-120.M  
 Last changed: 2024/4/19 20:03:58

Location: P2-D8  
 Inj: 1 of 1  
 Inj Volume: 10.000  
 Acq. Operator: system

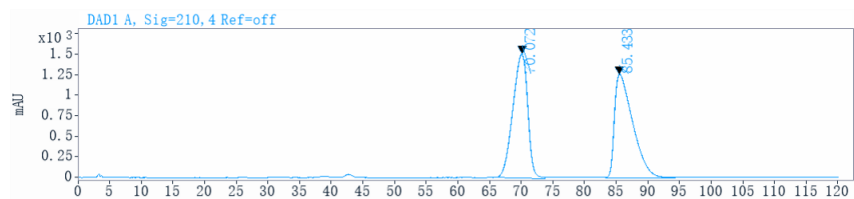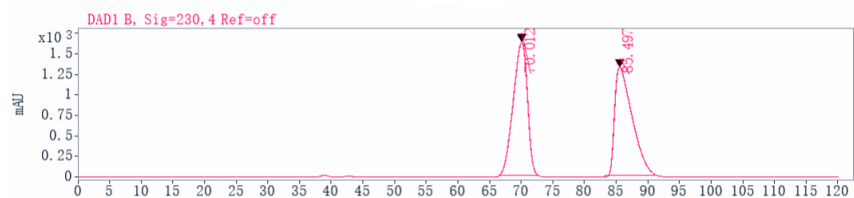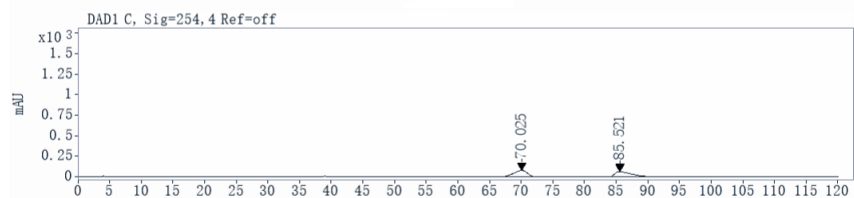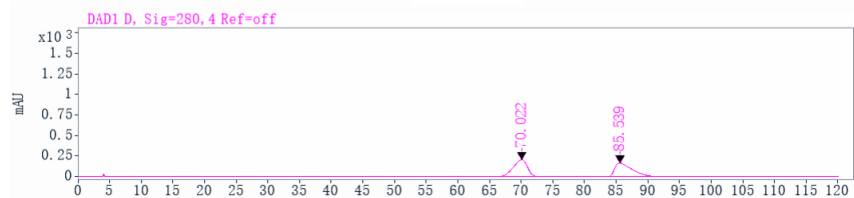

Signal: DAD1 A, Sig=210,4 Ref=off

| RetTime [min] | Type | Width [min] | Area [mAu*s] | Height [mAu\U] | Area% Name |
|---------------|------|-------------|--------------|----------------|------------|
| 70.072        | MM   | 2.7350      | 250042.4531  | 1523.7386      | 49.2712    |
| 85.433        | MM   | 3.3805      | 257439.1563  | 1269.2396      | 50.7288    |
| total         |      |             | 507481.6094  |                |            |

Signal: DAD1 B, Sig=230,4 Ref=off

| RetTime [min] | Type | Width [min] | Area [mAu*s] | Height [mAu\U] | Area% Name |
|---------------|------|-------------|--------------|----------------|------------|
| 70.012        | MM   | 2.6006      | 254556.0781  | 1631.4081      | 50.0825    |
| 85.497        | MM   | 3.1957      | 253717.2031  | 1323.2365      | 49.9175    |
| total         |      |             | 508273.2813  |                |            |

Signal: DAD1 C, Sig=254,4 Ref=off

| RetTime [min] | Type | Width [min] | Area [mAu*s] | Height [mAu\U] | Area% Name |
|---------------|------|-------------|--------------|----------------|------------|
| 70.025        | BB   | 1.8447      | 12394.4063   | 79.4199        | 50.1632    |
| 85.521        | BB   | 2.2722      | 12313.7568   | 63.5056        | 49.8368    |
| total         |      |             | 24708.1631   |                |            |

Signal: DAD1 D, Sig=280,4 Ref=off

| RetTime [min] | Type | Width [min] | Area [mAu*s] | Height [mAu\U] | Area% Name |
|---------------|------|-------------|--------------|----------------|------------|
| 70.022        | BB   | 1.8832      | 32274.7090   | 207.2068       | 50.1402    |
| 85.539        | BB   | 2.2728      | 32094.2168   | 165.3278       | 49.8598    |
| total         |      |             | 64368.9258   |                |            |

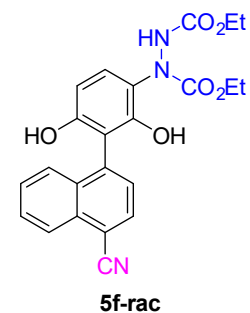



File of data: D:\ChemStation\2\Data\2024-1-24\_S 2024-01-24 08-39-15\ZHH-7-33.D  
 Sample name: ZHH-7-33  
 Remarks: ZHH-7-33  
 Acq. instrument: LC1260  
 Injection date: 2024/1/26 3:58:08  
 Acq. Method: AD-10-120.M  
 Analysis Method: AD-10-120.M  
 Last changed: 2024/4/19 20:03:58

Location: P2-D9  
 Inj: 1 of 1  
 Inj Volume: 10.000  
 Acq. Operator: system

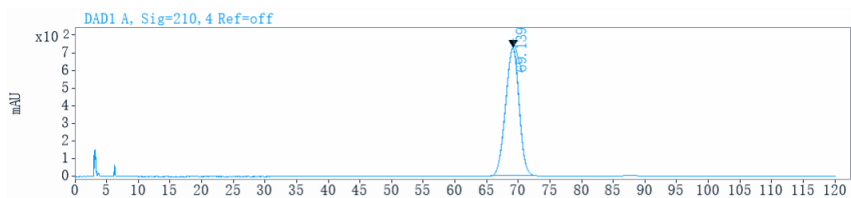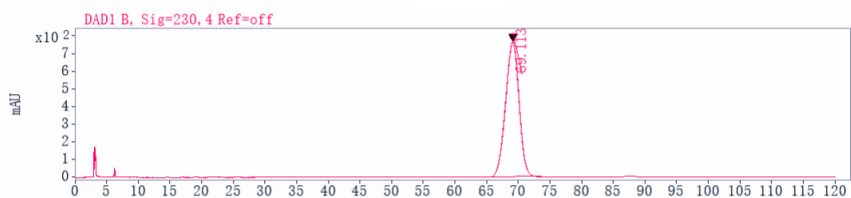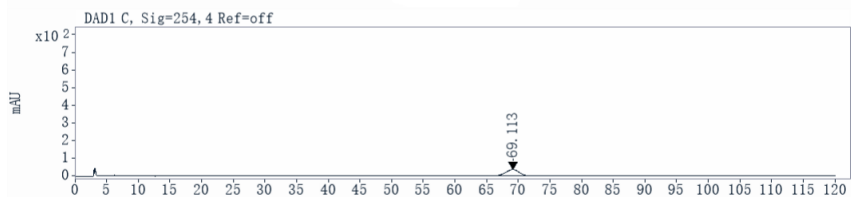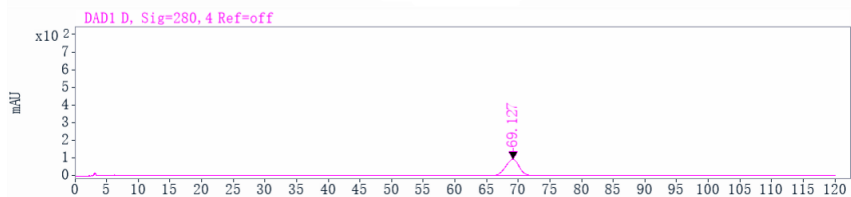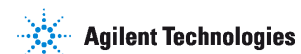

| Signal                    | RetTime [min] | Type | Width [min] | Area [mAu*s] | Height [mAu\U] | Area% Name |
|---------------------------|---------------|------|-------------|--------------|----------------|------------|
| DAD1 A, Sig=210,4 Ref=off | 69.139        | BV R | 1.7522      | 108369.4297  | 727.3796       | 100.0000   |
|                           |               |      | total       | 108369.4297  |                |            |
| DAD1 B, Sig=230,4 Ref=off | 69.113        | BB   | 1.7984      | 114652.2031  | 766.7967       | 100.0000   |
|                           |               |      | total       | 114652.2031  |                |            |
| DAD1 C, Sig=254,4 Ref=off | 69.113        | BB   | 1.6990      | 5109.2251    | 35.3750        | 100.0000   |
|                           |               |      | total       | 5109.2251    |                |            |
| DAD1 D, Sig=280,4 Ref=off | 69.127        | BB   | 1.7639      | 13905.3926   | 93.4541        | 100.0000   |
|                           |               |      | total       | 13905.3926   |                |            |

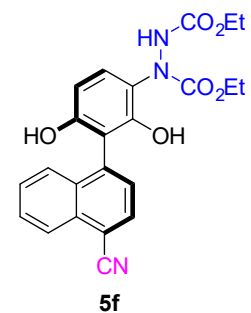



File of data: D:\ChemStation\2\Data\2024-1-31.S 2024-01-31 14-08-45\ZHH-7-46RAC.D  
 Sample name: ZHH-7-46RAC  
 Remarks: ZHH-7-46RAC  
 Acq. instrument: LC1260  
 Injection date: 2024/2/1 14:30:10  
 Acq. Method: AD-10-80.M  
 Analysis Method: AD-10-80.M  
 Last changed: 2024/4/19 20:22:19

Location: P2-D11  
 Inj: 1 of 1  
 Inj Volume: 5.000  
 Acq. Operator: system

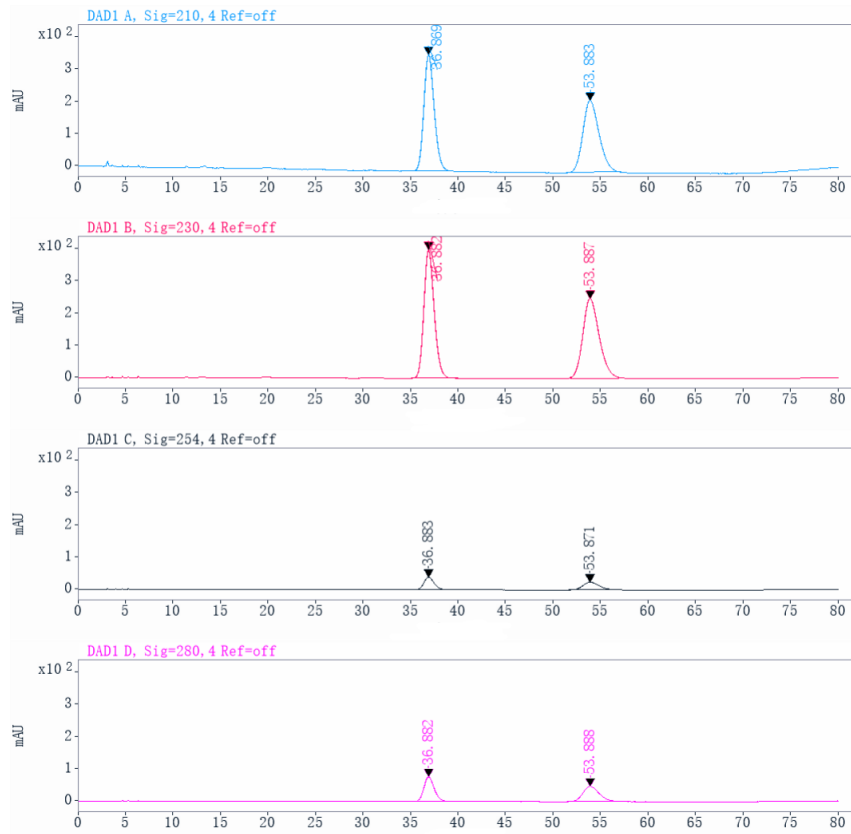

Signal: DAD1 A, Sig=210,4 Ref=off

| RetTime [min] | Type | Width [min] | Area [mAu*s] | Height [mAu\U] | Area% Name |
|---------------|------|-------------|--------------|----------------|------------|
| 36.869        | WV R | 0.9030      | 27569.0820   | 362.0419       | 50.5793    |
| 53.883        | WV R | 1.4104      | 26937.5820   | 224.6849       | 49.4207    |
| total         |      |             | 54506.6641   |                |            |

Signal: DAD1 B, Sig=230,4 Ref=off

| RetTime [min] | Type | Width [min] | Area [mAu*s] | Height [mAu\U] | Area% Name |
|---------------|------|-------------|--------------|----------------|------------|
| 36.882        | BB   | 1.1108      | 30206.6582   | 399.2059       | 49.7015    |
| 53.887        | MM   | 2.0280      | 30569.4375   | 251.2301       | 50.2985    |
| total         |      |             | 60776.0957   |                |            |

Signal: DAD1 C, Sig=254,4 Ref=off

| RetTime [min] | Type | Width [min] | Area [mAu*s] | Height [mAu\U] | Area% Name |
|---------------|------|-------------|--------------|----------------|------------|
| 36.883        | BB   | 0.9015      | 2921.4373    | 38.9290        | 50.5336    |
| 53.871        | BB   | 1.3997      | 2859.7358    | 24.1810        | 49.4664    |
| total         |      |             | 5781.1731    |                |            |

Signal: DAD1 D, Sig=280,4 Ref=off

| RetTime [min] | Type | Width [min] | Area [mAu*s] | Height [mAu\U] | Area% Name |
|---------------|------|-------------|--------------|----------------|------------|
| 36.882        | BB   | 1.0610      | 5769.7715    | 76.7584        | 50.3131    |
| 53.888        | BB   | 1.4093      | 5697.9702    | 47.7098        | 49.6869    |
| total         |      |             | 11467.7417   |                |            |

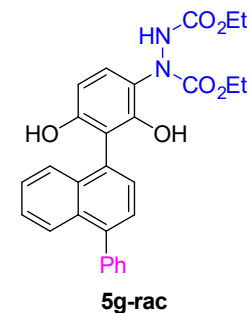



File of data: D:\ChemStation\2\Data\2024-2-29.S 2024-02-29 13-48-57\ZHH-7-46.D  
 Sample name: ZHH-7-46  
 Remarks: ZHH-7-46  
 Acq. instrument: LCT260  
 Injection date: 2024/3/2 3:23:52  
 Acq. Method: AD-10-80.M  
 Analysis Method: AD-10-80.M  
 Last changed: 2024/4/19 20:23:28

Location: P2-D3  
 Inj: 1 of 1  
 Inj Volume: 5.000  
 Acq. Operator: system

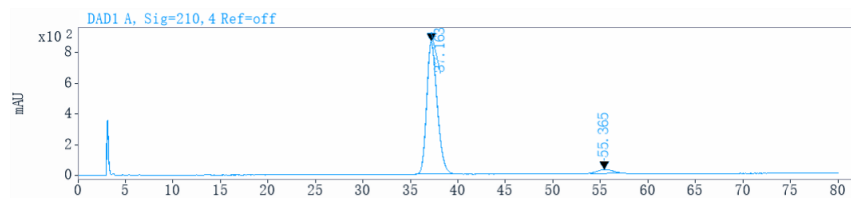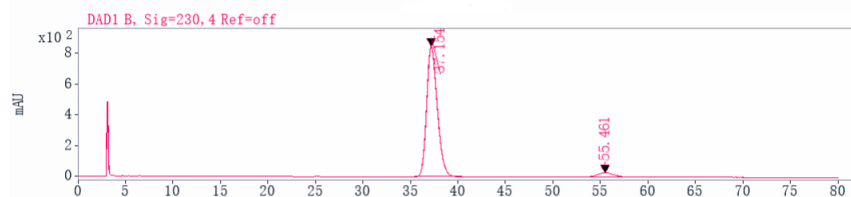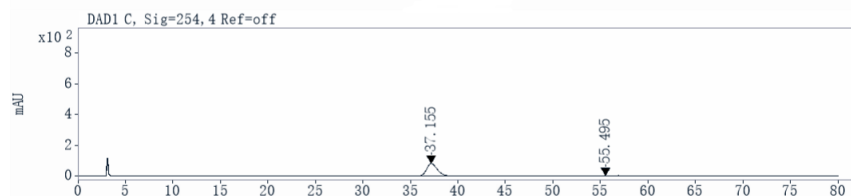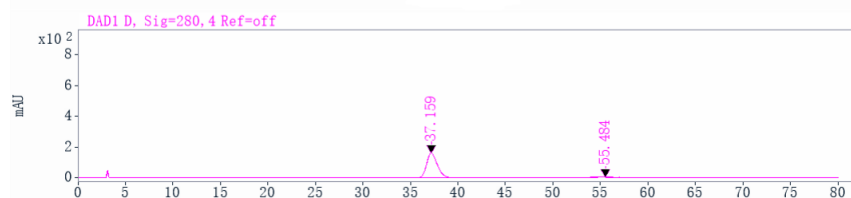

Signal: DAD1 A, Sig=210,4 Ref=off

| RetTime [min] | Type | Width [min] | Area [mAu*s] | Height [mAu\U] | Area% Name |
|---------------|------|-------------|--------------|----------------|------------|
| 37.163        | BV R | 0.9074      | 66593.8125   | 867.2626       | 94.6737    |
| 55.365        | MM   | 2.0490      | 3746.5022    | 30.4743        | 5.3263     |
|               |      |             | total        | 70340.3147     |            |

Signal: DAD1 B, Sig=230,4 Ref=off

| RetTime [min] | Type | Width [min] | Area [mAu*s] | Height [mAu\U] | Area% Name |
|---------------|------|-------------|--------------|----------------|------------|
| 37.154        | BB   | 1.0998      | 66369.2109   | 851.0490       | 95.1015    |
| 55.461        | BB   | 1.4417      | 3418.5569    | 27.7789        | 4.8985     |
|               |      |             | total        | 69787.7678     |            |

Signal: DAD1 C, Sig=254,4 Ref=off

| RetTime [min] | Type | Width [min] | Area [mAu*s] | Height [mAu\U] | Area% Name |
|---------------|------|-------------|--------------|----------------|------------|
| 37.155        | BB   | 1.0695      | 6388.1533    | 82.1218        | 95.2145    |
| 55.495        | MM   | 1.8807      | 321.0669     | 2.8453         | 4.7855     |
|               |      |             | total        | 6709.2202      |            |

Signal: DAD1 D, Sig=280,4 Ref=off

| RetTime [min] | Type | Width [min] | Area [mAu*s] | Height [mAu\U] | Area% Name |
|---------------|------|-------------|--------------|----------------|------------|
| 37.159        | BB   | 1.1067      | 12560.5410   | 161.6252       | 95.6694    |
| 55.484        | MM   | 1.8617      | 568.5690     | 5.0901         | 4.3306     |
|               |      |             | total        | 13129.1100     |            |

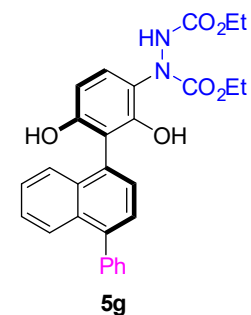

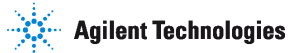

File of data: D:\ChemStation\2\Data\2024-1-24\_S 2024-01-24 08-39-15\ZHH-7-32RAC.D  
 Sample name: ZHH-7-32RAC  
 Remarks: ZHH-7-32RAC  
 Acq. instrument: LC1260  
 Injection date: 2024/1/24 17:11:07  
 Acq. Method: OD-10-60.M  
 Analysis Method: OD-10-60.M  
 Last changed: 2024/4/19 20:01:23

Location: P2-D3  
 Inj: 1 of 1  
 Inj Volume: 5.000  
 Acq. Operator: system

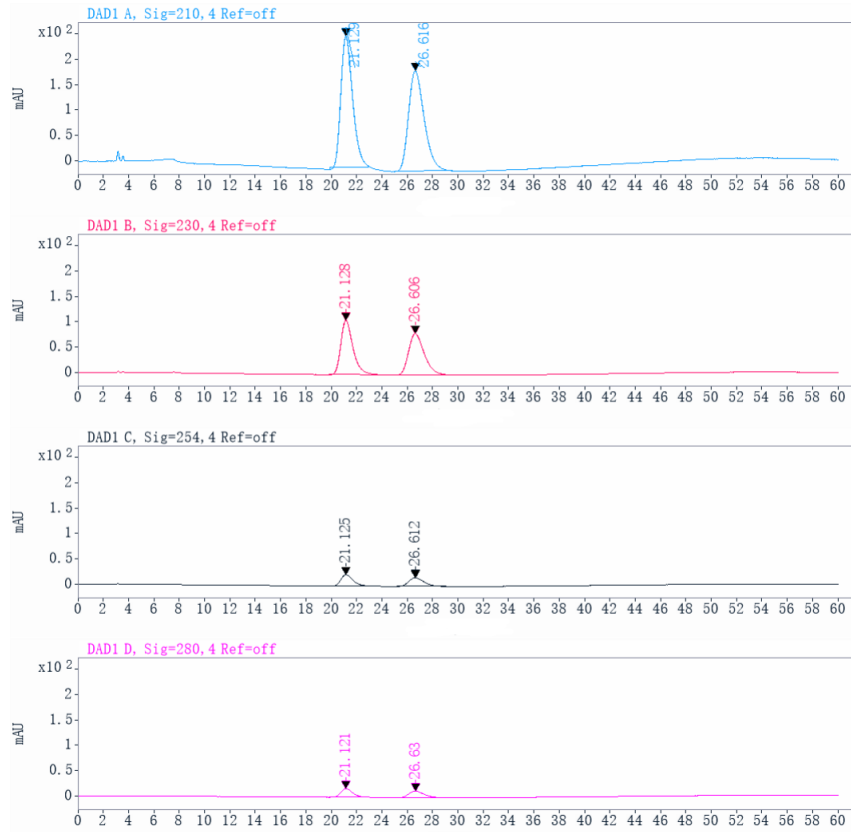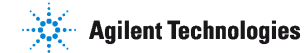

Signal: DAD1 A, Sig=210,4 Ref=off

| RetTime [min] | Type | Width [min] | Area [mAu*s] | Height [mAu\U] | Area% Name |
|---------------|------|-------------|--------------|----------------|------------|
| 21.129        | MM   | 1.0869      | 16971.7891   | 260.2426       | 49.6962    |
| 26.616        | BV R | 1.0335      | 17179.2656   | 198.9378       | 50.3038    |
| total         |      |             | 34151.0547   |                |            |

Signal: DAD1 B, Sig=230,4 Ref=off

| RetTime [min] | Type | Width [min] | Area [mAu*s] | Height [mAu\U] | Area% Name |
|---------------|------|-------------|--------------|----------------|------------|
| 21.128        | BB   | 1.0103      | 7302.5254    | 107.5354       | 50.8167    |
| 26.606        | BB   | 1.1574      | 7067.7944    | 82.1797        | 49.1833    |
| total         |      |             | 14370.3198   |                |            |

Signal: DAD1 C, Sig=254,4 Ref=off

| RetTime [min] | Type | Width [min] | Area [mAu*s] | Height [mAu\U] | Area% Name |
|---------------|------|-------------|--------------|----------------|------------|
| 21.125        | BB   | 0.8001      | 1503.8503    | 22.3745        | 50.8648    |
| 26.612        | BB   | 0.9942      | 1452.7145    | 17.1502        | 49.1352    |
| total         |      |             | 2956.5648    |                |            |

Signal: DAD1 D, Sig=280,4 Ref=off

| RetTime [min] | Type | Width [min] | Area [mAu*s] | Height [mAu\U] | Area% Name |
|---------------|------|-------------|--------------|----------------|------------|
| 21.121        | MM   | 1.0775      | 1099.9727    | 17.0149        | 50.5117    |
| 26.630        | BB   | 0.9835      | 1077.6870    | 12.9413        | 49.4883    |
| total         |      |             | 2177.6597    |                |            |

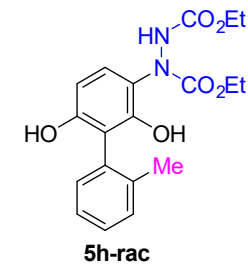



File of data: D:\ChemStation\2\Data\2024-1-24\_S 2024-01-24 08-39-15\ZHH-7-32.D  
 Sample name: ZHH-7-32  
 Remarks: ZHH-7-32  
 Acq. instrument: LC1260  
 Injection date: 2024/1/24 18:12:43  
 Acq. Method: OD-10-60.M  
 Analysis Method: OD-10-60.M  
 Last changed: 2024/4/19 20:01:23

Location: P2-D7  
 Inj: 1 of 1  
 Inj Volume: 5.000  
 Acq. Operator: system

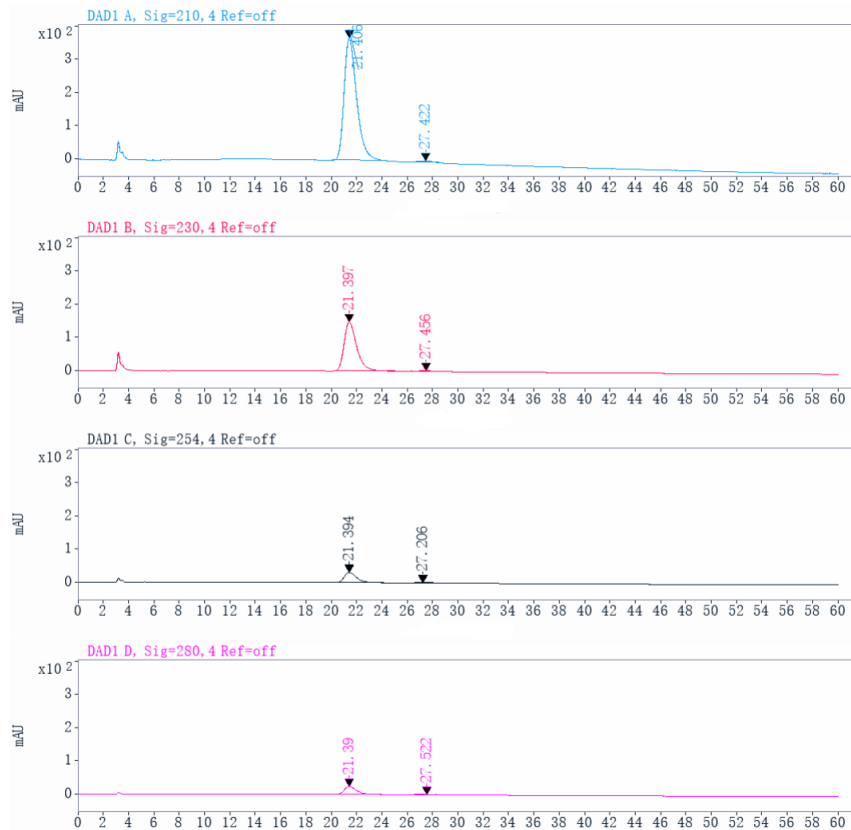

Signal: DAD1 A, Sig=210,4 Ref=off

| RetTime [min] | Type | Width [min] | Area [mAu*s] | Height [mAu\U] | Area% Name |
|---------------|------|-------------|--------------|----------------|------------|
| 21.406        | BB   | 0.8366      | 25676.6504   | 369.5409       | 98.5492    |
| 27.422        | MM   | 1.2682      | 377.9973     | 4.9676         | 1.4508     |
|               |      |             | total        | 26054.6477     |            |

Signal: DAD1 B, Sig=230,4 Ref=off

| RetTime [min] | Type | Width [min] | Area [mAu*s] | Height [mAu\U] | Area% Name |
|---------------|------|-------------|--------------|----------------|------------|
| 21.397        | BB   | 1.0288      | 10248.1465   | 147.8205       | 97.9630    |
| 27.456        | MM   | 1.4060      | 213.0960     | 2.5260         | 2.0370     |
|               |      |             | total        | 10461.2424     |            |

Signal: DAD1 C, Sig=254,4 Ref=off

| RetTime [min] | Type | Width [min] | Area [mAu*s] | Height [mAu\U] | Area% Name |
|---------------|------|-------------|--------------|----------------|------------|
| 21.394        | BB   | 0.8797      | 2119.7351    | 30.8477        | 98.4345    |
| 27.206        | MM   | 1.0712      | 33.7115      | 0.5245         | 1.5655     |
|               |      |             | total        | 2153.4466      |            |

Signal: DAD1 D, Sig=280,4 Ref=off

| RetTime [min] | Type | Width [min] | Area [mAu*s] | Height [mAu\U] | Area% Name |
|---------------|------|-------------|--------------|----------------|------------|
| 21.390        | BB   | 0.8617      | 1600.7189    | 23.5887        | 97.4300    |
| 27.522        | MM   | 1.2741      | 42.2243      | 0.5523         | 2.5700     |
|               |      |             | total        | 1642.9431      |            |

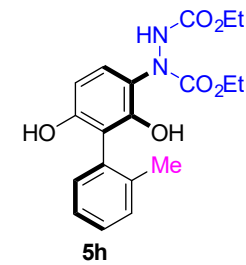



File of data: D:\ChemStation\2\Data\2024-1-31.S 2024-01-31 14-08-45\ZHH-7-44RAC.D  
 Sample name: ZHH-7-44RAC  
 Remarks: ZHH-7-44RAC  
 Acq. instrument: LCT260  
 Injection date: 2024/2/1 11:47:02  
 Acq. Method: AD-10-80.M  
 Analysis Method: AD-10-80.M  
 Last changed: 2024/4/19 20:14:15

Location: P2-D9  
 Inj: 1 of 1  
 Inj Volume: 5.000  
 Acq. Operator: system

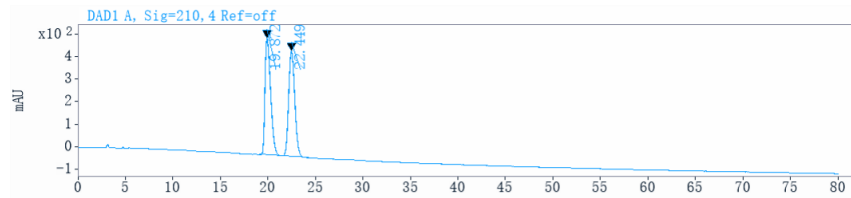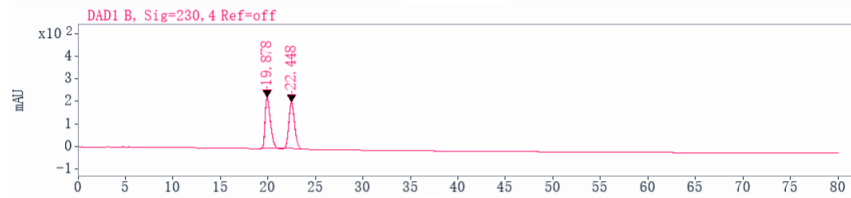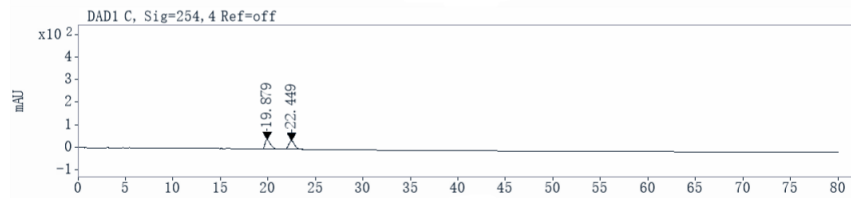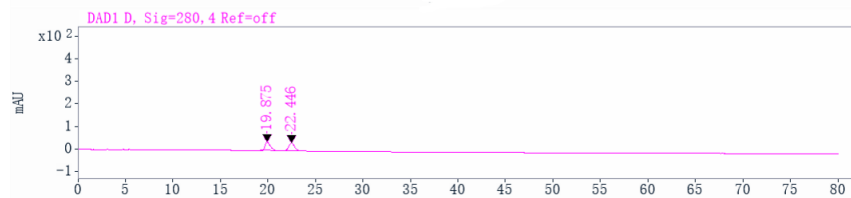

Signal: DAD1 A, Sig=210,4 Ref=off

| RetTime [min] | Type | Width [min] | Area [mAu*s] | Height [mAu\U] | Area% Name |
|---------------|------|-------------|--------------|----------------|------------|
| 19.872        | W R  | 0.6075      | 21484.0801   | 518.3514       | 50.4388    |
| 22.449        | W R  | 0.6780      | 21110.2578   | 468.2545       | 49.5612    |
| total         |      |             | 42594.3379   |                |            |

Signal: DAD1 B, Sig=230,4 Ref=off

| RetTime [min] | Type | Width [min] | Area [mAu*s] | Height [mAu\U] | Area% Name |
|---------------|------|-------------|--------------|----------------|------------|
| 19.878        | BB   | 0.6059      | 8975.9629    | 226.7272       | 50.2374    |
| 22.448        | BB   | 0.6653      | 8891.1309    | 206.9201       | 49.7626    |
| total         |      |             | 17867.0938   |                |            |

Signal: DAD1 C, Sig=254,4 Ref=off

| RetTime [min] | Type | Width [min] | Area [mAu*s] | Height [mAu\U] | Area% Name |
|---------------|------|-------------|--------------|----------------|------------|
| 19.879        | BB   | 0.5911      | 1648.9574    | 41.7194        | 50.3431    |
| 22.449        | BB   | 0.6346      | 1626.4794    | 38.0568        | 49.6569    |
| total         |      |             | 3275.4368    |                |            |

Signal: DAD1 D, Sig=280,4 Ref=off

| RetTime [min] | Type | Width [min] | Area [mAu*s] | Height [mAu\U] | Area% Name |
|---------------|------|-------------|--------------|----------------|------------|
| 19.875        | BB   | 0.5960      | 1510.5035    | 38.3092        | 50.1862    |
| 22.446        | BB   | 0.6350      | 1499.2974    | 35.0511        | 49.8138    |
| total         |      |             | 3009.8009    |                |            |

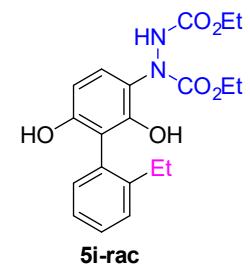





File of data: D:\ChemStation\2\Data\2024-2-29, S 2024-02-29 13-48-57\ZHH-7-44.D  
 Sample name: ZHH-7-44  
 Remarks: ZHH-7-44  
 Acq. instrument: LC1260  
 Injection date: 2024/3/2 2:02:17  
 Acq. Method: AD-10-80.M  
 Analysis Method: AD-10-80.M  
 Last changed: 2024/4/19 20:16:20

Location: P2-D2  
 Inj: 1 of 1  
 Inj Volume: 5.000  
 Acq. Operator: system

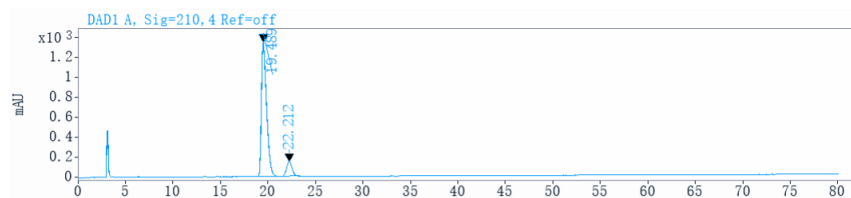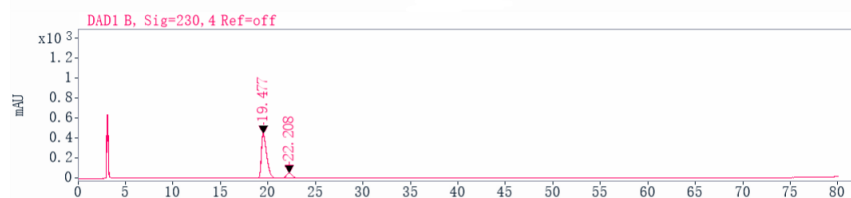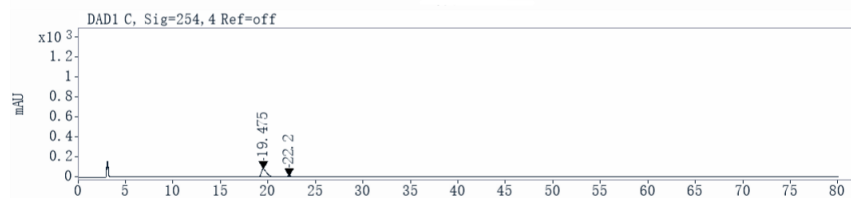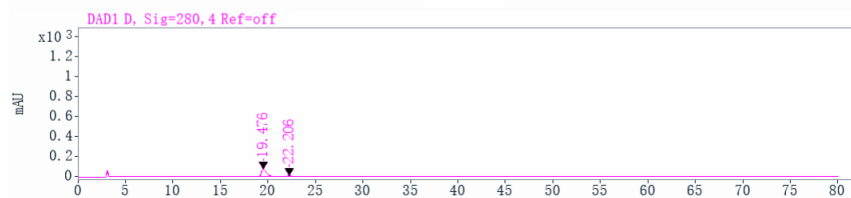

Signal: DAD1 A, Sig=210,4 Ref=off

| RetTime [min] | Type | Width [min] | Area [mAu*s] | Height [mAu\U] | Area% Name |
|---------------|------|-------------|--------------|----------------|------------|
| 19.489        | W R  | 0.4639      | 50461.3047   | 1344.4425      | 89.2739    |
| 22.212        | W R  | 0.5064      | 6062.8325    | 149.0950       | 10.7261    |
|               |      |             | total        | 56524.1372     |            |

Signal: DAD1 B, Sig=230,4 Ref=off

| RetTime [min] | Type | Width [min] | Area [mAu*s] | Height [mAu\U] | Area% Name |
|---------------|------|-------------|--------------|----------------|------------|
| 19.477        | BB   | 0.5901      | 17195.1758   | 445.6794       | 89.1669    |
| 22.208        | BB   | 0.5851      | 2089.0830    | 51.5129        | 10.8331    |
|               |      |             | total        | 19284.2588     |            |

Signal: DAD1 C, Sig=254,4 Ref=off

| RetTime [min] | Type | Width [min] | Area [mAu*s] | Height [mAu\U] | Area% Name |
|---------------|------|-------------|--------------|----------------|------------|
| 19.475        | BB   | 0.5742      | 3114.1436    | 80.7043        | 89.1889    |
| 22.200        | BB   | 0.5201      | 377.4850     | 9.3684         | 10.8111    |
|               |      |             | total        | 3491.6285      |            |

Signal: DAD1 D, Sig=280,4 Ref=off

| RetTime [min] | Type | Width [min] | Area [mAu*s] | Height [mAu\U] | Area% Name |
|---------------|------|-------------|--------------|----------------|------------|
| 19.476        | BB   | 0.5538      | 2865.8479    | 74.3337        | 89.4814    |
| 22.206        | BB   | 0.4809      | 336.8833     | 8.4540         | 10.5186    |
|               |      |             | total        | 3202.7312      |            |

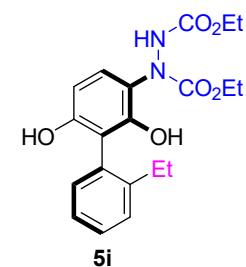



File of data: D:\ChemStation\2\Data\2024-1-26\_S 2024-01-26 13-50-38\ZHH-7-31RAC.D  
 Sample name: ZHH-7-31RAC  
 Remarks: ZHH-7-31RAC  
 Acq. instrument: LC1260  
 Injection date: 2024/1/27 23:56:24  
 Acq. Method: IC-07-120.M  
 Analysis Method: IC-07-120.M  
 Last changed: 2024/4/19 19:56:20

Location: P2-D2  
 Inj: 1 of 1  
 Inj Volume: 10.000  
 Acq. Operator: system

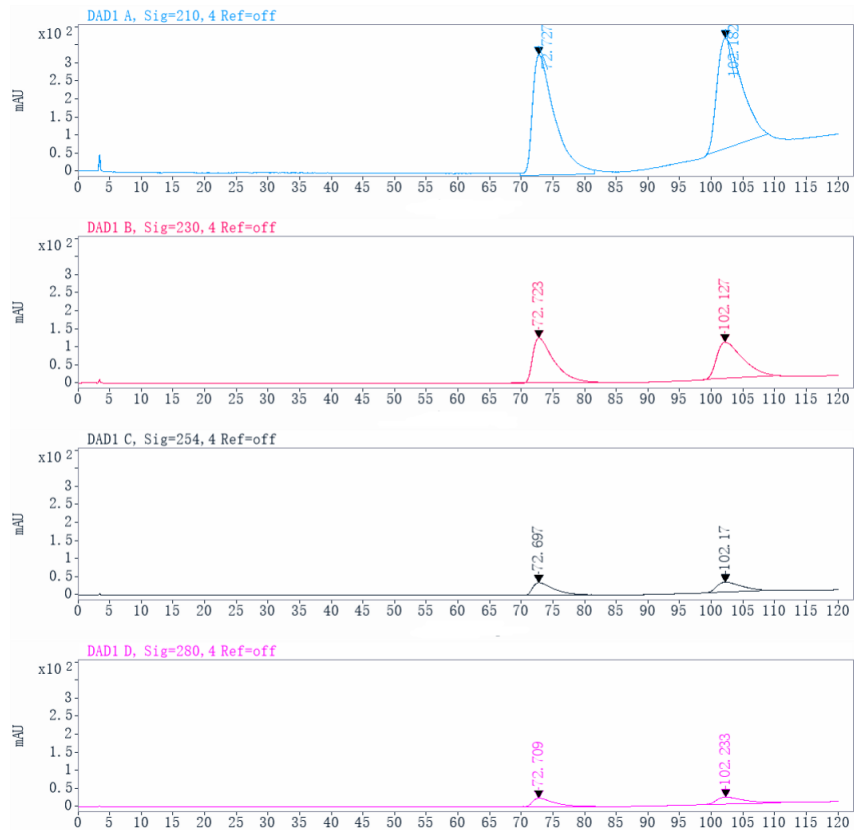

Signal: DAD1 A, Sig=210, 4 Ref=off

| RetTime [min] | Type | Width [min] | Area [mAu*s] | Height [mAu\U] | Area% Name |
|---------------|------|-------------|--------------|----------------|------------|
| 72.727        | MM   | 4.0974      | 82373.8281   | 335.0617       | 49.9428    |
| 102.182       | MM   | 4.4782      | 82562.4453   | 307.2777       | 50.0572    |
| total         |      |             | 164936.2734  |                |            |

Signal: DAD1 B, Sig=230, 4 Ref=off

| RetTime [min] | Type | Width [min] | Area [mAu*s] | Height [mAu\U] | Area% Name |
|---------------|------|-------------|--------------|----------------|------------|
| 72.723        | MM   | 3.9967      | 30065.1719   | 125.3763       | 50.4738    |
| 102.127       | BB   | 3.4016      | 29500.7539   | 101.6595       | 49.5262    |
| total         |      |             | 59565.9258   |                |            |

Signal: DAD1 C, Sig=254, 4 Ref=off

| RetTime [min] | Type | Width [min] | Area [mAu*s] | Height [mAu\U] | Area% Name |
|---------------|------|-------------|--------------|----------------|------------|
| 72.697        | MM   | 3.9678      | 8281.8291    | 34.7880        | 50.9977    |
| 102.170       | MM   | 4.7380      | 7957.7881    | 27.9929        | 49.0023    |
| total         |      |             | 16239.6172   |                |            |

Signal: DAD1 D, Sig=280, 4 Ref=off

| RetTime [min] | Type | Width [min] | Area [mAu*s] | Height [mAu\U] | Area% Name |
|---------------|------|-------------|--------------|----------------|------------|
| 72.709        | MM   | 4.1443      | 5989.0015    | 24.0851        | 49.0832    |
| 102.233       | MM   | 5.2728      | 6212.7344    | 19.6376        | 50.9168    |
| total         |      |             | 12201.7358   |                |            |

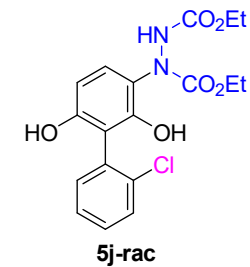



File of data: D:\ChemStation\2\Data\2024-1-29, S 2024-01-29 13-49-53\ZHH-7-31.D  
 Sample name: ZHH-7-31  
 Remarks: ZHH-7-31  
 Acq. instrument: LCI260  
 Injection date: 2024/1/30 12:17:11  
 Acq. Method: IC-07-120.M  
 Analysis Method: IC-07-120.M  
 Last changed: 2024/6/3 21:11:53

Location: P2-D4  
 Inj: 1 of 1  
 Inj Volume: 5.000  
 Acq. Operator: system

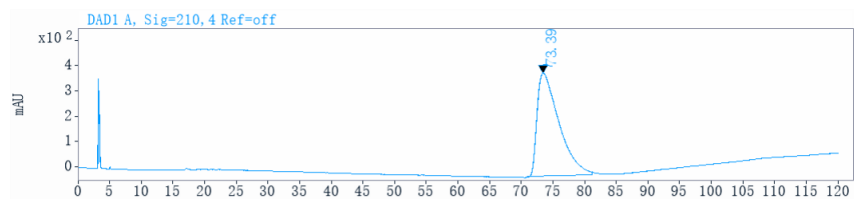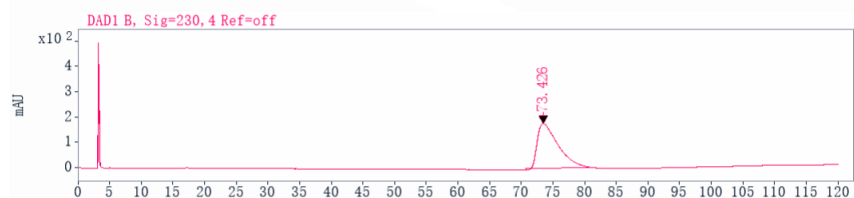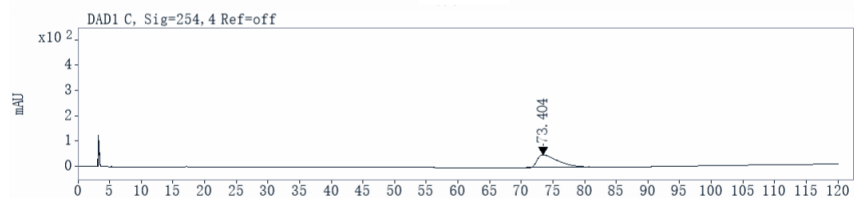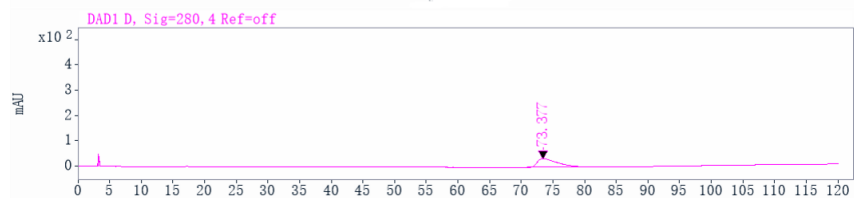

Signal: DAD1 A, Sig=210,4 Ref=off

| RetTime [min] | Type | Width [min] | Area [mAu*s] | Height [mAu\U] | Area% Name |
|---------------|------|-------------|--------------|----------------|------------|
| 73.390        | MM   | 4.0288      | 99177.3203   | 410.2839       | 100.0000   |
|               |      | total       | 99177.3203   |                |            |

Signal: DAD1 B, Sig=230,4 Ref=off

| RetTime [min] | Type | Width [min] | Area [mAu*s] | Height [mAu\U] | Area% Name |
|---------------|------|-------------|--------------|----------------|------------|
| 73.426        | MM   | 3.8487      | 41372.6563   | 179.1648       | 100.0000   |
|               |      | total       | 41372.6563   |                |            |

Signal: DAD1 C, Sig=254,4 Ref=off

| RetTime [min] | Type | Width [min] | Area [mAu*s] | Height [mAu\U] | Area% Name |
|---------------|------|-------------|--------------|----------------|------------|
| 73.404        | MM   | 4.0449      | 12549.5195   | 51.7092        | 100.0000   |
|               |      | total       | 12549.5195   |                |            |

Signal: DAD1 D, Sig=280,4 Ref=off

| RetTime [min] | Type | Width [min] | Area [mAu*s] | Height [mAu\U] | Area% Name |
|---------------|------|-------------|--------------|----------------|------------|
| 73.377        | MM   | 3.9111      | 8129.9907    | 34.6448        | 100.0000   |
|               |      | total       | 8129.9907    |                |            |

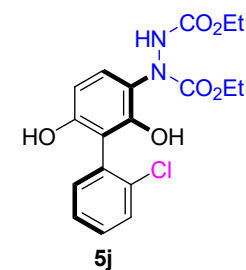



File of data: D:\ChemStation\2\Data\2024-1-31.S 2024-01-31 14-08-45\ZHH-7-43RAC,.D  
 Sample name: ZHH-7-43RAC,  
 Remarks: ZHH-7-43RAC,  
 Acq. instrument: LC1260  
 Injection date: 2024/2/1 16:14:04  
 Acq. Method: IC-10-90.M  
 Analysis Method: IC-10-90.M  
 Last changed: 2024/4/19 20:11:21

Location: P2-D8  
 Inj: 1 of 1  
 Inj Volume: 5.000  
 Acq. Operator: system

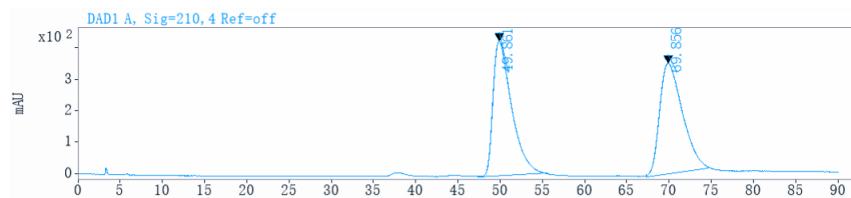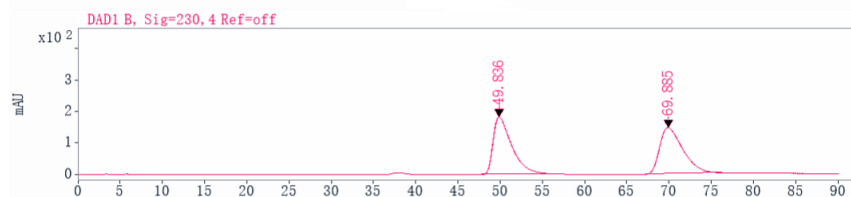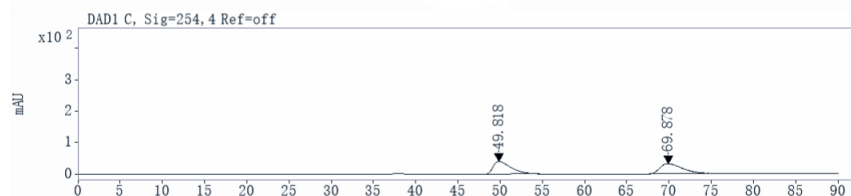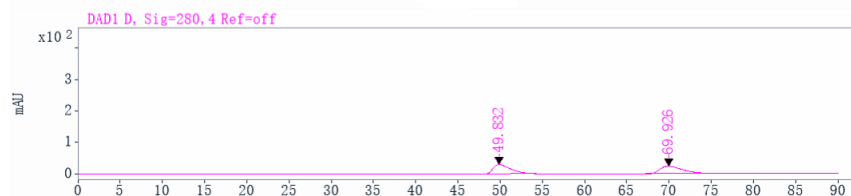

Signal: DAD1 A, Sig=210,4 Ref=off

| RetTime [min] | Type | Width [min] | Area [mAu*s] | Height [mAu\U] | Area% Name |
|---------------|------|-------------|--------------|----------------|------------|
| 49.861        | MM   | 2.5549      | 65819.1406   | 429.3586       | 49.7631    |
| 69.866        | MM   | 3.1362      | 66445.9141   | 353.1157       | 50.2369    |
|               |      |             | total        | 132265.0547    |            |

Signal: DAD1 B, Sig=230,4 Ref=off

| RetTime [min] | Type | Width [min] | Area [mAu*s] | Height [mAu\U] | Area% Name |
|---------------|------|-------------|--------------|----------------|------------|
| 49.836        | BB   | 1.7971      | 27997.6992   | 182.5729       | 49.9579    |
| 69.885        | BB   | 2.2398      | 28044.9121   | 147.1326       | 50.0421    |
|               |      |             | total        | 56042.6113     |            |

Signal: DAD1 C, Sig=254,4 Ref=off

| RetTime [min] | Type | Width [min] | Area [mAu*s] | Height [mAu\U] | Area% Name |
|---------------|------|-------------|--------------|----------------|------------|
| 49.818        | BB   | 1.7392      | 6099.4116    | 41.2471        | 49.9406    |
| 69.878        | MM   | 3.0899      | 6113.9233    | 32.9779        | 50.0594    |
|               |      |             | total        | 12213.3350     |            |

Signal: DAD1 D, Sig=280,4 Ref=off

| RetTime [min] | Type | Width [min] | Area [mAu*s] | Height [mAu\U] | Area% Name |
|---------------|------|-------------|--------------|----------------|------------|
| 49.832        | BB   | 1.7245      | 4405.7729    | 30.1912        | 49.6372    |
| 69.926        | MM   | 3.0863      | 4470.1758    | 24.1400        | 50.3628    |
|               |      |             | total        | 8875.9487      |            |

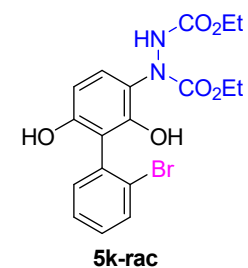



## Agilent Technologies

File of data: D:\ChemStation\2\Data\2024-2-29\_S 2024-02-29 13-48-57\ZHH-7-43.D  
 Sample name: ZHH-7-43  
 Remarks: ZHH-7-43  
 Acq. instrument: LC1260  
 Injection date: 2024/3/2 0:08:18  
 Acq. Method: IC-10-90.M  
 Analysis Method: IC-10-90.M  
 Last changed: 2024/4/19 20:12:58

Location: P2-D1  
 Inj: 1 of 1  
 Inj Volume: 5.000  
 Acq. Operator: system

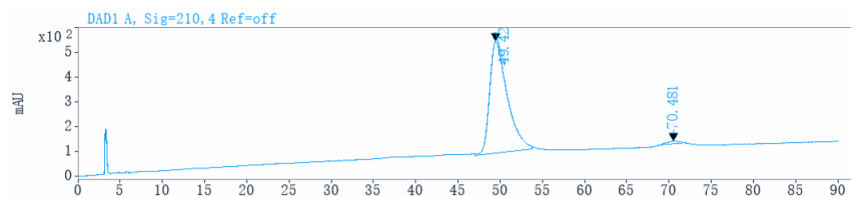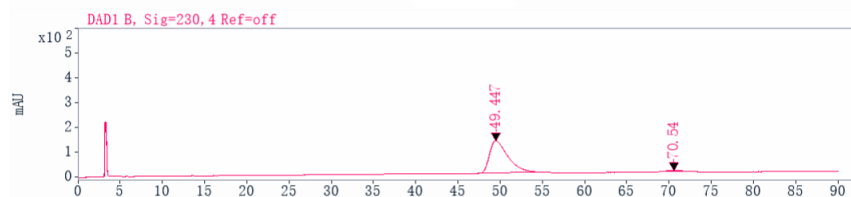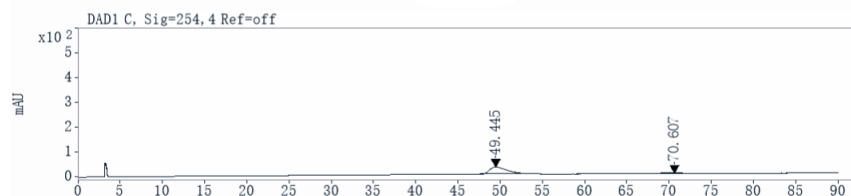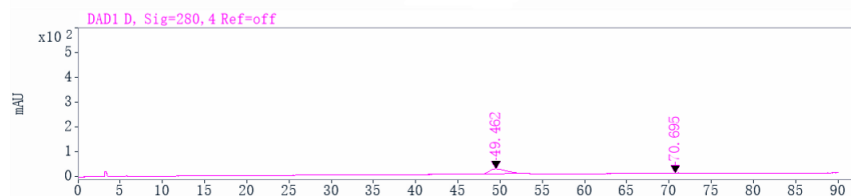

## Agilent Technologies

Signal: DAD1 A, Sig=210,4 Ref=off

| RetTime [min] | Type | Width [min] | Area [mAu*s] | Height [mAu\U] | Area% Name |
|---------------|------|-------------|--------------|----------------|------------|
| 49.420        | MM   | 2.4239      | 65892.2656   | 453.0790       | 98.1463    |
| 70.481        | MM   | 1.7069      | 1244.4900    | 12.1517        | 1.8537     |
|               |      |             | total        | 67136.7556     |            |

Signal: DAD1 B, Sig=230,4 Ref=off

| RetTime [min] | Type | Width [min] | Area [mAu*s] | Height [mAu\U] | Area% Name |
|---------------|------|-------------|--------------|----------------|------------|
| 49.447        | BB   | 1.8156      | 19924.7813   | 130.1843       | 97.3011    |
| 70.540        | MM   | 1.9346      | 552.6743     | 4.7612         | 2.6989     |
|               |      |             | total        | 20477.4555     |            |

Signal: DAD1 C, Sig=254,4 Ref=off

| RetTime [min] | Type | Width [min] | Area [mAu*s] | Height [mAu\U] | Area% Name |
|---------------|------|-------------|--------------|----------------|------------|
| 49.445        | BB   | 1.7482      | 4275.4980    | 28.7635        | 97.1121    |
| 70.607        | MM   | 1.9182      | 127.1426     | 1.1047         | 2.8879     |
|               |      |             | total        | 4402.6406      |            |

Signal: DAD1 D, Sig=280,4 Ref=off

| RetTime [min] | Type | Width [min] | Area [mAu*s] | Height [mAu\U] | Area% Name |
|---------------|------|-------------|--------------|----------------|------------|
| 49.462        | BB   | 1.6979      | 3031.7393    | 20.9060        | 98.0931    |
| 70.695        | MM   | 1.4204      | 58.9355      | 0.6915         | 1.9069     |
|               |      |             | total        | 3090.6748      |            |

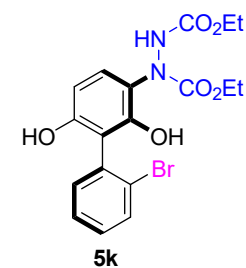



File of data: D:\ChemStation\2\Data\2024-1-26\_S 2024-01-26 13-50-38\ZHH-7-3ORAC.D  
 Sample name: ZHH-7-3ORAC  
 Remarks: ZHH-7-3ORAC  
 Acq. instrument: LC1260  
 Injection date: 2024/1/27 19:41:53  
 Acq. Method: IC-05-120.M  
 Analysis Method: IC-05-120.M  
 Last changed: 2024/4/19 19:51:56

Location: P2-D1  
 Inj: 1 of 1  
 Inj Volume: 10.000  
 Acq. Operator: system

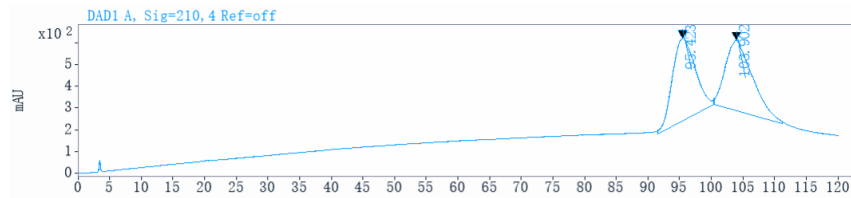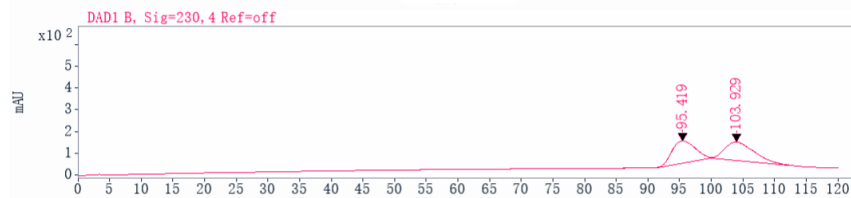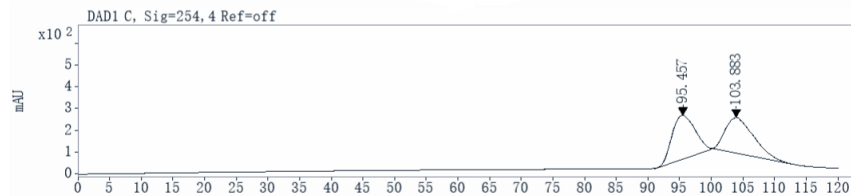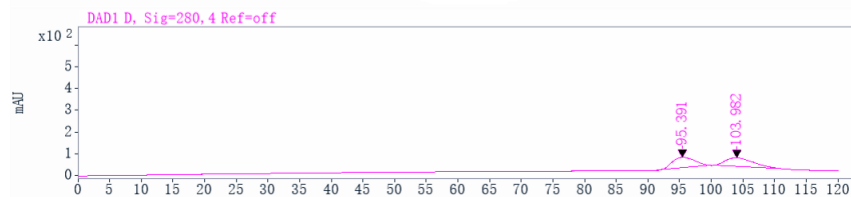

Signal: DAD1 A, Sig=210,4 Ref=off

| RetTime [min] | Type | Width [min] | Area [mAu*s] | Height [mAu\U] | Area% Name |
|---------------|------|-------------|--------------|----------------|------------|
| 95.423        | MM   | 4.2051      | 96348.5703   | 381.8711       | 49.9590    |
| 103.902       | MM   | 4.9402      | 96506.6875   | 325.5850       | 50.0410    |
| total         |      |             | 192855.2578  |                |            |

Signal: DAD1 B, Sig=230,4 Ref=off

| RetTime [min] | Type | Width [min] | Area [mAu*s] | Height [mAu\U] | Area% Name |
|---------------|------|-------------|--------------|----------------|------------|
| 95.419        | MM   | 3.0324      | 26955.1250   | 104.0133       | 48.2339    |
| 103.929       | MM   | 5.5076      | 28929.0273   | 87.5433        | 51.7661    |
| total         |      |             | 55884.1523   |                |            |

Signal: DAD1 C, Sig=254,4 Ref=off

| RetTime [min] | Type | Width [min] | Area [mAu*s] | Height [mAu\U] | Area% Name |
|---------------|------|-------------|--------------|----------------|------------|
| 95.457        | MM   | 2.9901      | 51500.2695   | 201.8541       | 49.7380    |
| 103.883       | BB   | 3.6808      | 52042.8945   | 165.4931       | 50.2620    |
| total         |      |             | 103543.1641  |                |            |

Signal: DAD1 D, Sig=280,4 Ref=off

| RetTime [min] | Type | Width [min] | Area [mAu*s] | Height [mAu\U] | Area% Name |
|---------------|------|-------------|--------------|----------------|------------|
| 95.391        | BB   | 2.9357      | 12481.2207   | 49.7360        | 49.3907    |
| 103.982       | MM   | 5.1587      | 12789.1738   | 41.3190        | 50.6093    |
| total         |      |             | 25270.3945   |                |            |

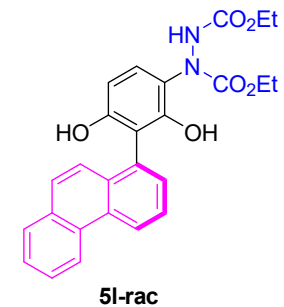

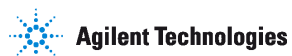

File of data: D:\ChemStation\2\Data\2024-1-26\_S 2024-01-26 13-50-38\ZHH-7-30.D  
 Sample name: ZHH-7-30  
 Remarks: ZHH-7-30  
 Acq. instrument: LCT1260  
 Injection date: 2024/1/27 21:43:28  
 Acq. Method: IC-05-120.M  
 Analysis Method: IC-05-120.M  
 Last changed: 2024/4/19 19:51:56

Location: P2-D3  
 Inj: 1 of 1  
 Inj Volume: 10.000  
 Acq. Operator: system

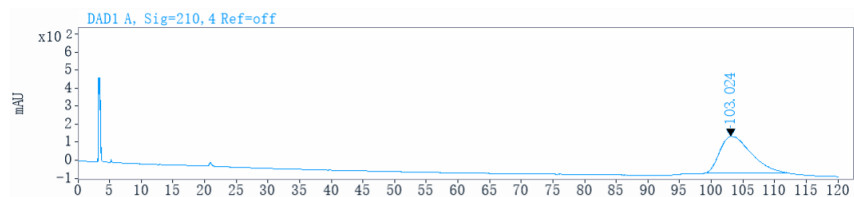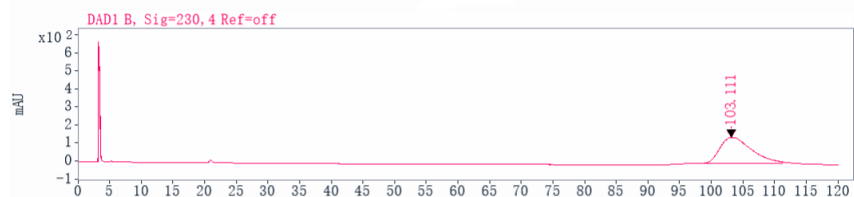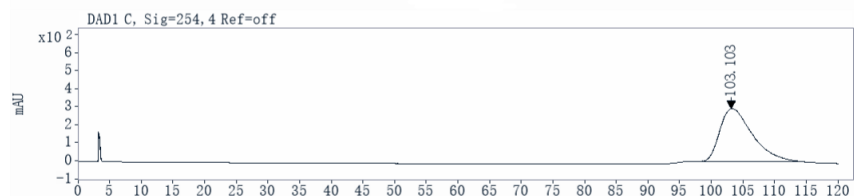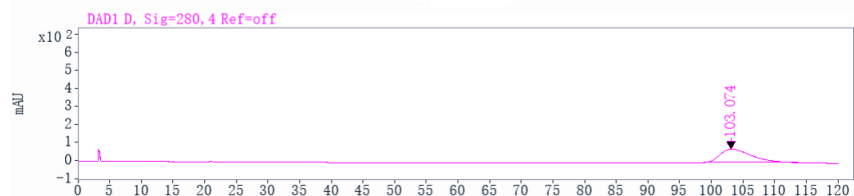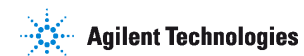

Signal: DAD1 A, Sig=210,4 Ref=off

| RetTime [min] | Type | Width [min] | Area [mAu*s] | Height [mAu\U] | Area% Name |
|---------------|------|-------------|--------------|----------------|------------|
| 103.024       | MM   | 5.8346      | 72034.7266   | 205.7687       | 100.0000   |
|               |      | total       | 72034.7266   |                |            |

Signal: DAD1 B, Sig=230,4 Ref=off

| RetTime [min] | Type | Width [min] | Area [mAu*s] | Height [mAu\U] | Area% Name |
|---------------|------|-------------|--------------|----------------|------------|
| 103.111       | MM   | 5.9391      | 52716.0781   | 147.9344       | 100.0000   |
|               |      | total       | 52716.0781   |                |            |

Signal: DAD1 C, Sig=254,4 Ref=off

| RetTime [min] | Type | Width [min] | Area [mAu*s] | Height [mAu\U] | Area% Name |
|---------------|------|-------------|--------------|----------------|------------|
| 103.103       | MM   | 5.9566      | 104869.2891  | 293.4257       | 100.0000   |
|               |      | total       | 104869.2891  |                |            |

Signal: DAD1 D, Sig=280,4 Ref=off

| RetTime [min] | Type | Width [min] | Area [mAu*s] | Height [mAu\U] | Area% Name |
|---------------|------|-------------|--------------|----------------|------------|
| 103.074       | MM   | 5.8204      | 26183.5000   | 74.9757        | 100.0000   |
|               |      | total       | 26183.5000   |                |            |

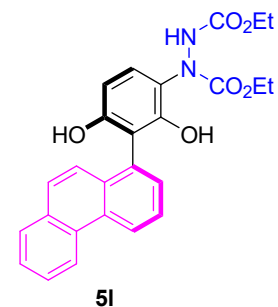



File of data: D:\ChemStation\2\Data\2024-4-2.S1 2024-04-02 08-45-44\ZHH-7-70-1.D  
 Sample name: ZHH-7-70-1  
 Remarks: ZHH-7-70-1  
 Acq. instrument: LC1260  
 Injection date: 2024/4/2 10:11:39  
 Acq. Method: IC-15-60.M  
 Analysis Method: IC-15-60.M  
 Last changed: 2024/4/19 20:43:58

Location: P2-D2  
 Inj: 1 of 1  
 Inj Volume: 5.000  
 Acq. Operator: system

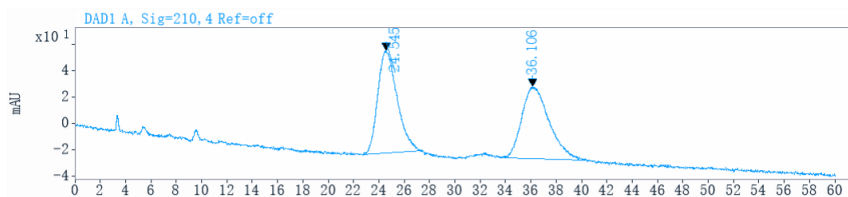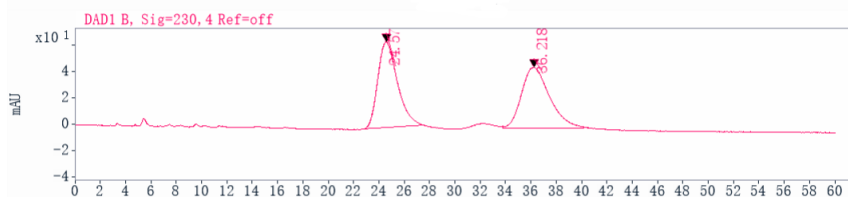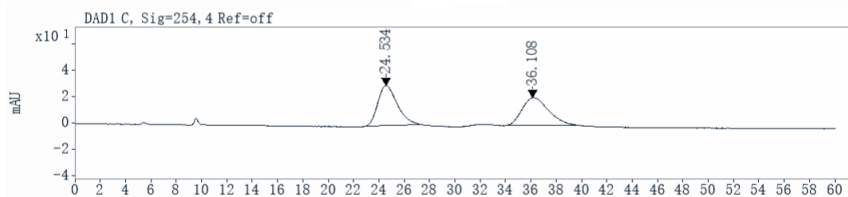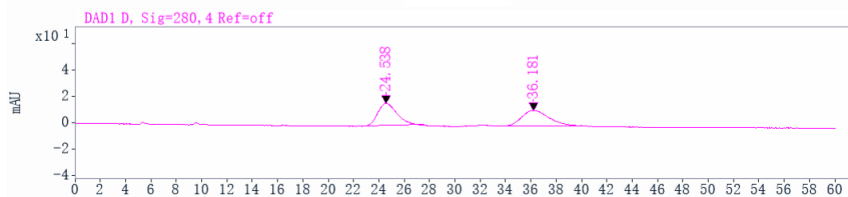

Signal: DAD1 A, Sig=210,4 Ref=off

| RetTime [min] | Type | Width [min] | Area [mAu*s] | Height [mAu\U] | Area% Name |
|---------------|------|-------------|--------------|----------------|------------|
| 24.545        | MM   | 1.7848      | 8331.5801    | 77.8025        | 49.9987    |
| 36.106        | MM   | 2.5324      | 8332.0020    | 54.8352        | 50.0013    |
| total         |      |             | 16663.5820   |                |            |

Signal: DAD1 B, Sig=230,4 Ref=off

| RetTime [min] | Type | Width [min] | Area [mAu*s] | Height [mAu\U] | Area% Name |
|---------------|------|-------------|--------------|----------------|------------|
| 24.570        | BV R | 1.2892      | 7091.3740    | 65.0805        | 49.5912    |
| 36.218        | MM   | 2.5899      | 7208.2852    | 46.3877        | 50.4088    |
| total         |      |             | 14299.6592   |                |            |

Signal: DAD1 C, Sig=254,4 Ref=off

| RetTime [min] | Type | Width [min] | Area [mAu*s] | Height [mAu\U] | Area% Name |
|---------------|------|-------------|--------------|----------------|------------|
| 24.534        | BB   | 1.2612      | 3234.2627    | 30.2547        | 50.8319    |
| 36.108        | MM   | 2.4585      | 3128.4014    | 21.2077        | 49.1681    |
| total         |      |             | 6362.6641    |                |            |

Signal: DAD1 D, Sig=280,4 Ref=off

| RetTime [min] | Type | Width [min] | Area [mAu*s] | Height [mAu\U] | Area% Name |
|---------------|------|-------------|--------------|----------------|------------|
| 24.538        | MM   | 1.7621      | 1781.0049    | 16.8453        | 49.5991    |
| 36.181        | MM   | 2.5337      | 1809.7972    | 11.9049        | 50.4009    |
| total         |      |             | 3590.8021    |                |            |

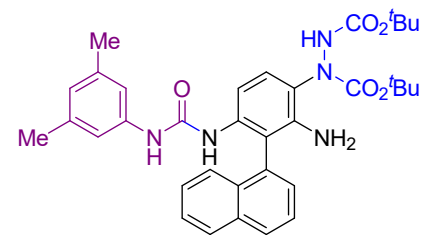

6-rac





## Agilent Technologies

File of data: D:\ChemStation\2\Data\2024-4-17, S 2024-04-17 17-02-13\ZHH-7-85-1-SHOU.D  
 Sample name: ZHH-7-85-1-SHOU  
 Remarks: ZHH-7-85-1-SHOU  
 Acq. instrument: LCT260  
 Injection date: 2024/4/18 12:49:42  
 Acq. Method: IC-15-60.M  
 Analysis Method: IC-15-60.M  
 Last changed: 2024/5/23 14:02:18

Location: P2-D5  
 Inj: 1 of 1  
 Inj Volume: 15.000  
 Acq. Operator: system

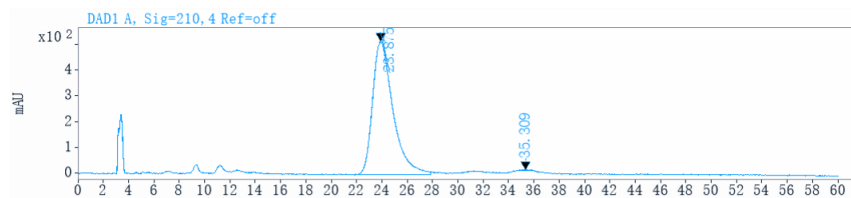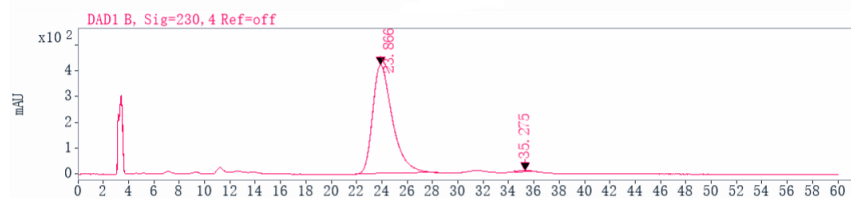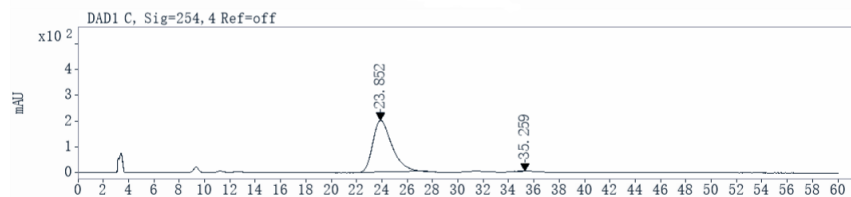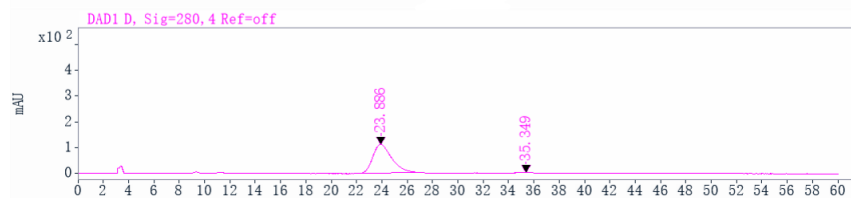

## Agilent Technologies

Signal: DAD1 A, Sig=210,4 Ref=off

| RetTime [min] | Type | Width [min] | Area [mAu*s] | Height [mAu\U] | Area%   | Name |
|---------------|------|-------------|--------------|----------------|---------|------|
| 23.875        | MM   | 1.8715      | 58516.7539   | 521.1080       | 99.3502 |      |
| 35.309        | MM   | 0.8950      | 382.7494     | 7.1273         | 0.6498  |      |
|               |      |             | total        | 58899.5033     |         |      |

Signal: DAD1 B, Sig=230,4 Ref=off

| RetTime [min] | Type | Width [min] | Area [mAu*s] | Height [mAu\U] | Area%   | Name |
|---------------|------|-------------|--------------|----------------|---------|------|
| 23.866        | BV R | 1.2898      | 46366.2578   | 424.0020       | 99.2290 |      |
| 35.275        | MM   | 1.1240      | 360.2405     | 5.3418         | 0.7710  |      |
|               |      |             | total        | 46726.4984     |         |      |

Signal: DAD1 C, Sig=254,4 Ref=off

| RetTime [min] | Type | Width [min] | Area [mAu*s] | Height [mAu\U] | Area%   | Name |
|---------------|------|-------------|--------------|----------------|---------|------|
| 23.852        | BB   | 1.2630      | 21601.6016   | 202.1027       | 99.2157 |      |
| 35.259        | MM   | 1.0691      | 170.7684     | 2.6622         | 0.7843  |      |
|               |      |             | total        | 21772.3700     |         |      |

Signal: DAD1 D, Sig=280,4 Ref=off

| RetTime [min] | Type | Width [min] | Area [mAu*s] | Height [mAu\U] | Area%   | Name |
|---------------|------|-------------|--------------|----------------|---------|------|
| 23.886        | BB   | 1.2466      | 11819.7793   | 111.8782       | 99.4194 |      |
| 35.349        | MM   | 0.9312      | 69.0218      | 1.2354         | 0.5806  |      |
|               |      |             | total        | 11888.8011     |         |      |

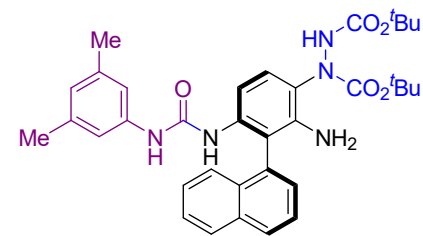

6



File of data: D:\ChemStation\2\Data\2024-3-26\_S1\_2024-03-26\_19-46-06\ZHH-7-62-2.D  
 Sample name: ZHH-7-62-2  
 Remarks: ZHH-7-62-2  
 Acq. instrument: LCT260  
 Injection date: 2024/3/26 19:59:01  
 Acq. Method: AD-10-80.M  
 Analysis Method: AD-10-80.M  
 Last changed: 2024/4/19 20:28:39

Location: P2-D1  
 Inj: 1 of 1  
 Inj Volume: 10.000  
 Acq. Operator: system

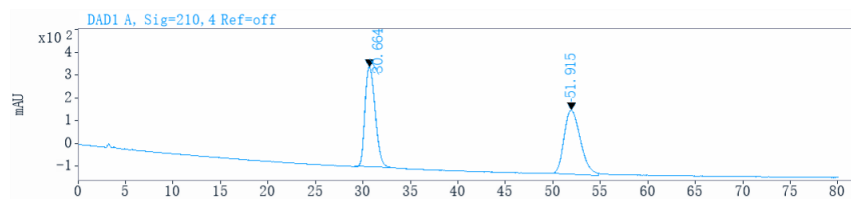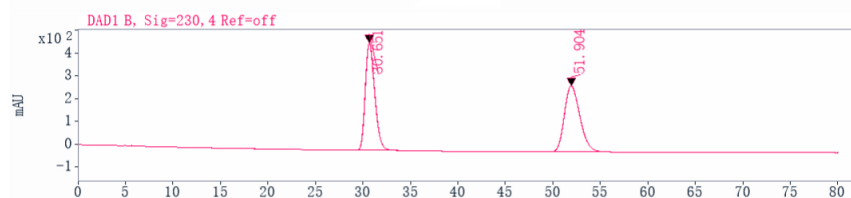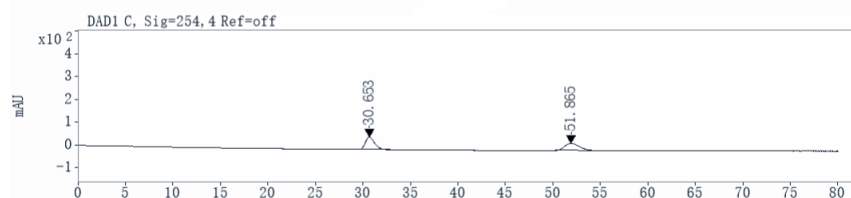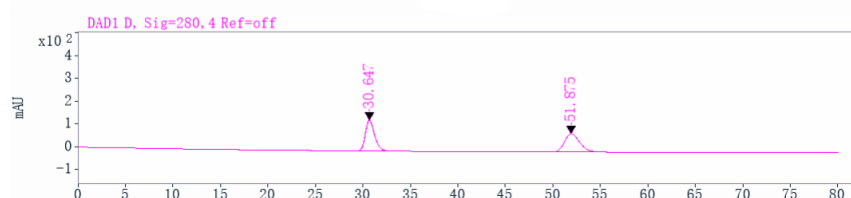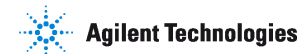

Signal: DAD1 A, Sig=210, 4 Ref=off

| RetTime [min] | Type | Width [min] | Area [mAu*s] | Height [mAu\U] | Area% Name |
|---------------|------|-------------|--------------|----------------|------------|
| 30.664        | W R  | 0.9001      | 32993.8477   | 438.3806       | 49.1417    |
| 51.915        | MM   | 2.0133      | 34146.4414   | 282.6729       | 50.8583    |
|               |      |             | total        | 67140.2891     |            |

Signal: DAD1 B, Sig=230, 4 Ref=off

| RetTime [min] | Type | Width [min] | Area [mAu*s] | Height [mAu\U] | Area% Name |
|---------------|------|-------------|--------------|----------------|------------|
| 30.651        | BB   | 0.9754      | 32716.4668   | 471.5587       | 49.9414    |
| 51.904        | BB   | 1.3342      | 32793.2500   | 290.2356       | 50.0586    |
|               |      |             | total        | 65509.7168     |            |

Signal: DAD1 C, Sig=254, 4 Ref=off

| RetTime [min] | Type | Width [min] | Area [mAu*s] | Height [mAu\U] | Area% Name |
|---------------|------|-------------|--------------|----------------|------------|
| 30.653        | BB   | 0.8279      | 3654.8110    | 54.9575        | 51.0064    |
| 51.865        | BB   | 1.2734      | 3510.5894    | 32.4180        | 48.9936    |
|               |      |             | total        | 7165.4004      |            |

Signal: DAD1 D, Sig=280, 4 Ref=off

| RetTime [min] | Type | Width [min] | Area [mAu*s] | Height [mAu\U] | Area% Name |
|---------------|------|-------------|--------------|----------------|------------|
| 30.647        | BB   | 0.9496      | 9037.8936    | 135.2459       | 50.4589    |
| 51.875        | BB   | 1.3030      | 8873.5146    | 80.4396        | 49.5411    |
|               |      |             | total        | 17911.4082     |            |

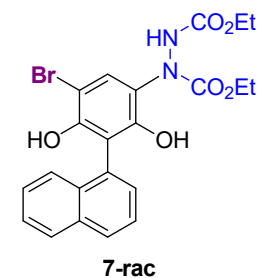



File of data: D:\ChemStation\2\Data\2024-4-10-1.S 2024-04-10 11-32-15\ZHH-7-78-2.D  
 Sample name: ZHH-7-78-2  
 Remarks: ZHH-7-78-2  
 Acq. instrument: LC1260  
 Injection date: 2024/4/10 13:28:17  
 Acq. Method: AD-10-80.M  
 Analysis Method: AD-10-80.M  
 Last changed: 2024/4/19 20:32:15

Location: P2-D2  
 Inj: 1 of 1  
 Inj Volume: 10.000  
 Acq. Operator: system

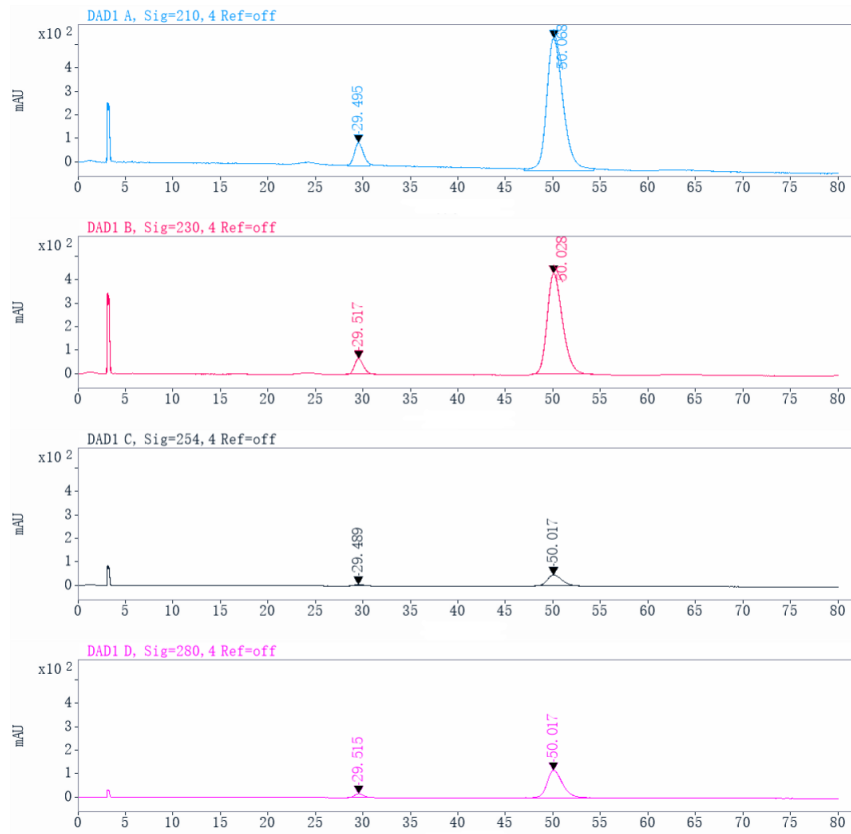

Signal: DAD1 A, Sig=210, 4 Ref=off

| RetTime [min] | Type | Width [min] | Area [mAu*s] | Height [mAu\U] | Area% Name |
|---------------|------|-------------|--------------|----------------|------------|
| 29.495        | MM   | 1.1140      | 6713.6284    | 100.4452       | 8.7850     |
| 50.068        | MM   | 2.0447      | 69707.6250   | 568.1929       | 91.2150    |
|               |      |             | total        | 76421.2534     |            |

Signal: DAD1 B, Sig=230, 4 Ref=off

| RetTime [min] | Type | Width [min] | Area [mAu*s] | Height [mAu\U] | Area% Name |
|---------------|------|-------------|--------------|----------------|------------|
| 29.517        | BB   | 0.7886      | 4452.8062    | 67.5866        | 8.3976     |
| 50.028        | BV R | 1.3480      | 48571.8125   | 431.2643       | 91.6024    |
|               |      |             | total        | 53024.6187     |            |

Signal: DAD1 C, Sig=254, 4 Ref=off

| RetTime [min] | Type | Width [min] | Area [mAu*s] | Height [mAu\U] | Area% Name |
|---------------|------|-------------|--------------|----------------|------------|
| 29.489        | BB   | 0.7313      | 415.1362     | 6.7142         | 7.5220     |
| 50.017        | BB   | 1.2749      | 5103.7974    | 47.1491        | 92.4780    |
|               |      |             | total        | 5518.9336      |            |

Signal: DAD1 D, Sig=280, 4 Ref=off

| RetTime [min] | Type | Width [min] | Area [mAu*s] | Height [mAu\U] | Area% Name |
|---------------|------|-------------|--------------|----------------|------------|
| 29.515        | BB   | 0.7615      | 1098.0494    | 17.0922        | 7.3360     |
| 50.017        | MM   | 1.9401      | 13869.9727   | 119.1509       | 92.6640    |
|               |      |             | total        | 14968.0221     |            |

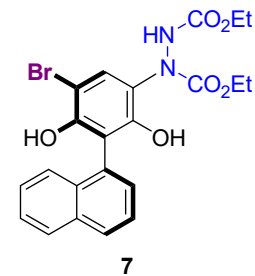

1a

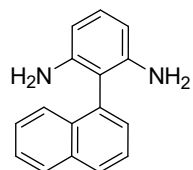

1a

7.929  
7.925  
7.910  
7.904  
7.691  
7.670  
7.616  
7.598  
7.578  
7.540  
7.537  
7.523  
7.521  
7.506  
7.503  
7.462  
7.459  
7.441  
7.438  
7.424  
7.421  
7.260  
7.090  
7.070  
7.050  
6.324  
6.304

3.071

Current Data Parameters  
NAME 20231021-400M  
EXPNO 34  
PROCNO 1

F2 - Acquisition Parameters  
Date\_ 20231021  
Time 1.07  
INSTRUM spect  
PROBHD 5 mm PADUL 13C  
PULPROG zg30  
TD 65536  
SOLVENT CDCl3  
NS 6  
DS 2  
SWH 8223.685 Hz  
FIDRES 0.125483 Hz  
AQ 3.9845889 sec  
RG 193.13  
DW 60.800 usec  
DE 6.50 usec  
TE 294.0 K  
D1 1.00000000 sec  
TD0 1

==== CHANNEL f1 =====  
NUC1 1H  
P1 9.90 usec  
PLW1 23.00000000 W  
SFO1 400.1924713 MHz

F2 - Processing parameters  
SI 65536  
SF 400.1900140 MHz  
WDW EM  
SSB 0  
LB 0.30 Hz  
GB 0  
PC 1.00

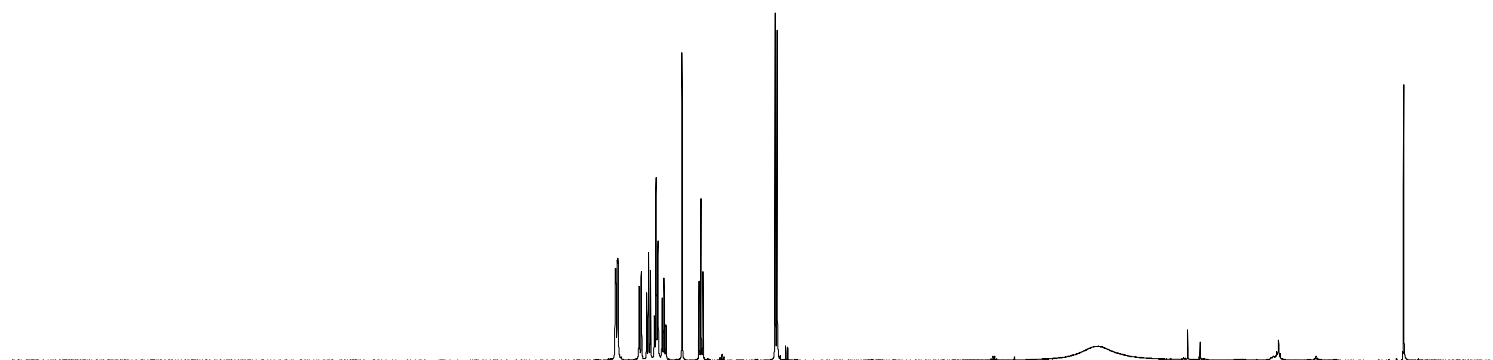

13 12 11 10 9 8 7 6 5 4 3 2 1 0 ppm

2.04  
1.01  
1.02  
2.02  
1.03  
1.00  
2.00

4.07

1b

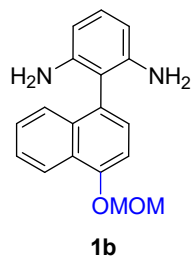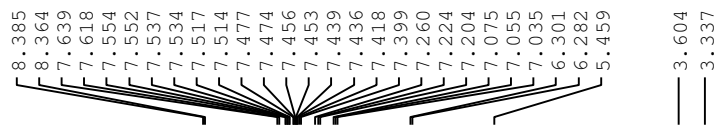

Current Data Parameters  
NAME 20231124-400M  
EXPNO 25  
PROCNO 1

F2 - Acquisition Parameters  
Date\_ 20231124  
Time 0.46  
INSTRUM spect  
PROBHD 5 mm PADUL 13C  
PULPROG zg30  
TD 65536  
SOLVENT CDC13  
NS 8  
DS 2  
SWH 8223.685 Hz  
FIDRES 0.125483 Hz  
AQ 3.9845889 sec  
RG 53.3  
DW 60.800 usec  
DE 6.50 usec  
TE 292.2 K  
D1 1.00000000 sec  
TD0 1

==== CHANNEL f1 =====  
NUC1 1H  
P1 9.90 usec  
PLW1 23.00000000 W  
SFO1 400.1924713 MHz

F2 - Processing parameters  
SI 65536  
SF 400.1900138 MHz  
WDW EM  
SSB 0  
LB 0.30 Hz  
GB 0  
PC 1.00

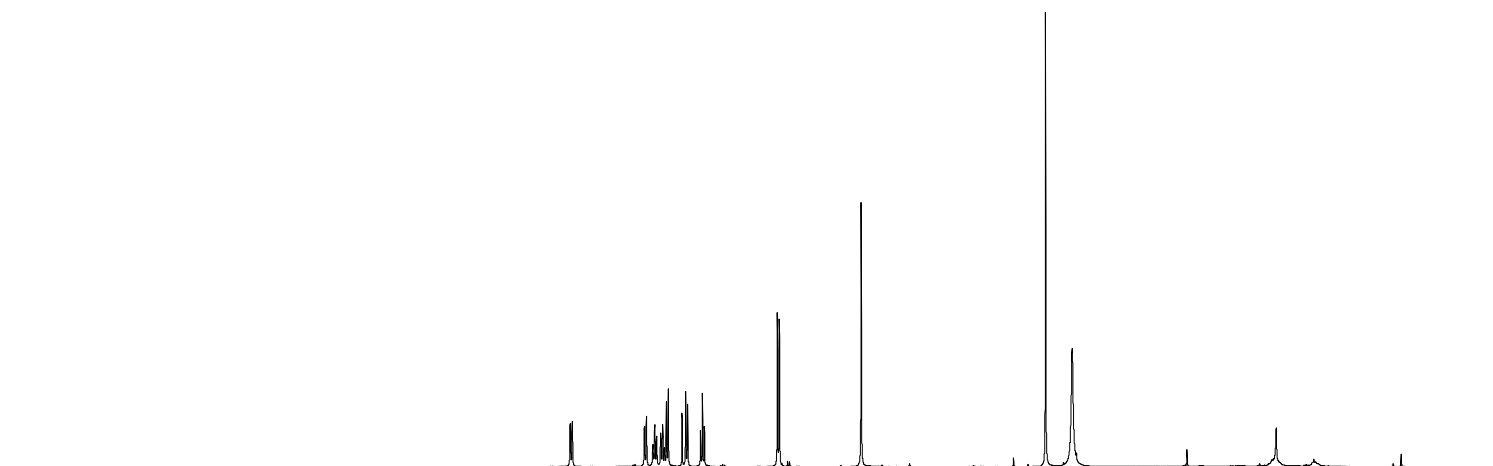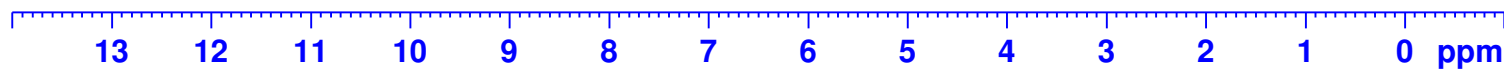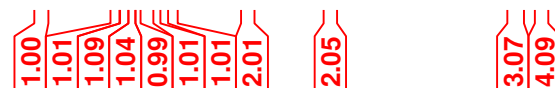

1b

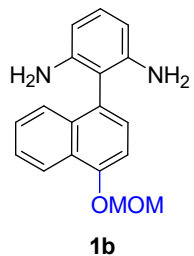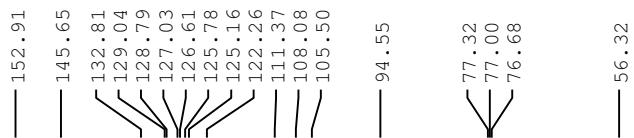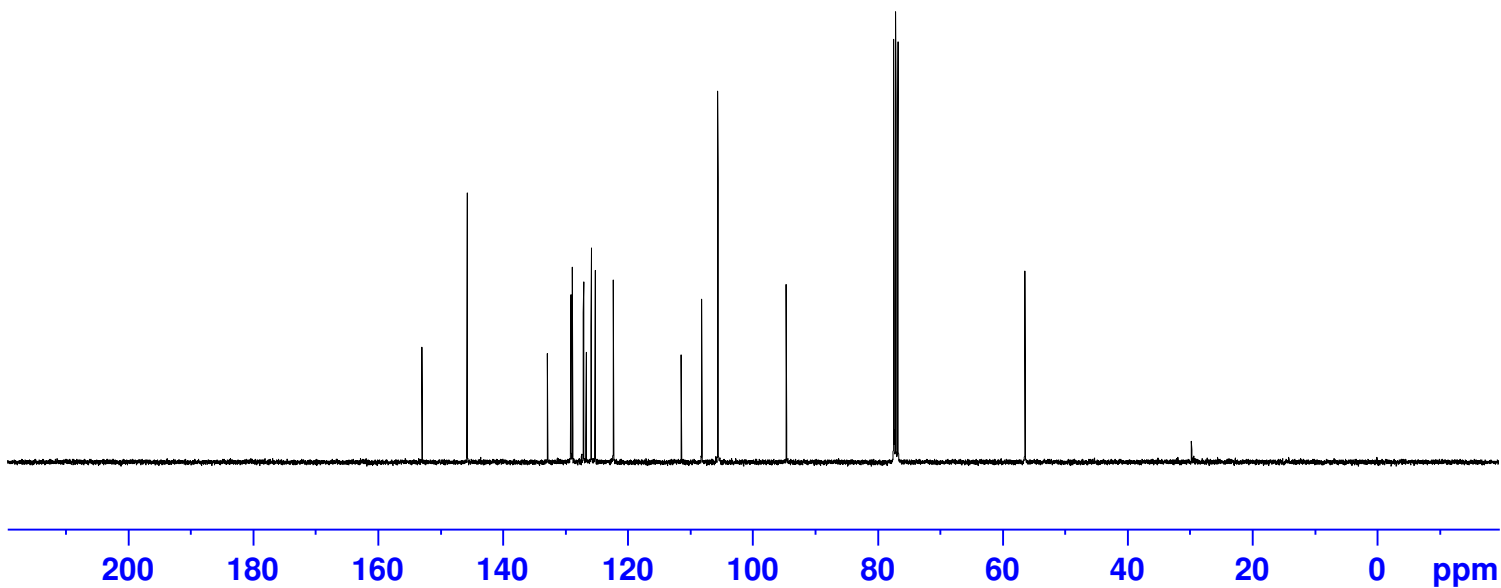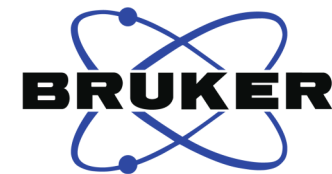

Current Data Parameters  
NAME 20231124-400M  
EXPNO 26  
PROCNO 1

F2 - Acquisition Parameters  
Date\_ 20231124  
Time 1.10  
INSTRUM spect  
PROBHD 5 mm PADUL 13C  
PULPROG zgpg30  
TD 65536  
SOLVENT CDC13  
NS 400  
DS 4  
SWH 24038.461 Hz  
FIDRES 0.366798 Hz  
AQ 1.3631488 sec  
RG 37.77  
DW 20.800 usec  
DE 6.50 usec  
TE 292.7 K  
D1 2.00000000 sec  
D11 0.03000000 sec  
TD0 1

==== CHANNEL f1 =====  
NUC1 13C  
P1 9.80 usec  
PLW1 47.40000153 W  
SFO1 100.6379178 MHz

==== CHANNEL f2 =====  
CPDPRG[2] waltz16  
NUC2 1H  
PCPD2 90.00 usec  
PLW2 23.00000000 W  
PLW12 0.30712000 W  
PLW13 0.24877000 W  
SFO2 400.1916008 MHz

F2 - Processing parameters  
SI 32768  
SF 100.6278693 MHz  
WDW EM  
SSB 0  
LB 1.00 Hz  
GB 0  
PC 1.40

1c

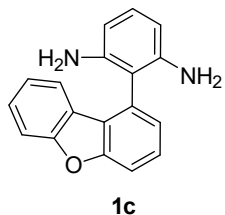

7.615  
7.612  
7.595  
7.591  
7.582  
7.565  
7.561  
7.559  
7.544  
7.538  
7.423  
7.420  
7.405  
7.402  
7.399  
7.384  
7.381  
7.321  
7.317  
7.303  
7.300  
7.266  
7.264  
7.247  
7.245  
7.244  
7.241  
7.182  
7.179  
7.162  
7.144  
7.142  
7.114  
7.094  
7.074  
6.324  
6.304  
3.320

-0.000

Current Data Parameters  
NAME 20231111-400  
EXPNO 16  
PROCNO 1

F2 - Acquisition Parameters  
Date\_ 20231111  
Time 1.19  
INSTRUM spect  
PROBHD 5 mm PADUL 13C  
PULPROG zg30  
TD 65536  
SOLVENT CDC13  
NS 6  
DS 2  
SWH 8223.685 Hz  
FIDRES 0.125483 Hz  
AQ 3.9845889 sec  
RG 100.49  
DW 60.800 usec  
DE 6.50 usec  
TE 292.5 K  
D1 1.00000000 sec  
TD0 1

==== CHANNEL f1 =====  
NUC1 1H  
P1 9.90 usec  
PLW1 23.00000000 W  
SFO1 400.1924713 MHz

F2 - Processing parameters  
SI 65536  
SF 400.1900216 MHz  
WDW EM  
SSB 0  
LB 0.30 Hz  
GB 0  
PC 1.00

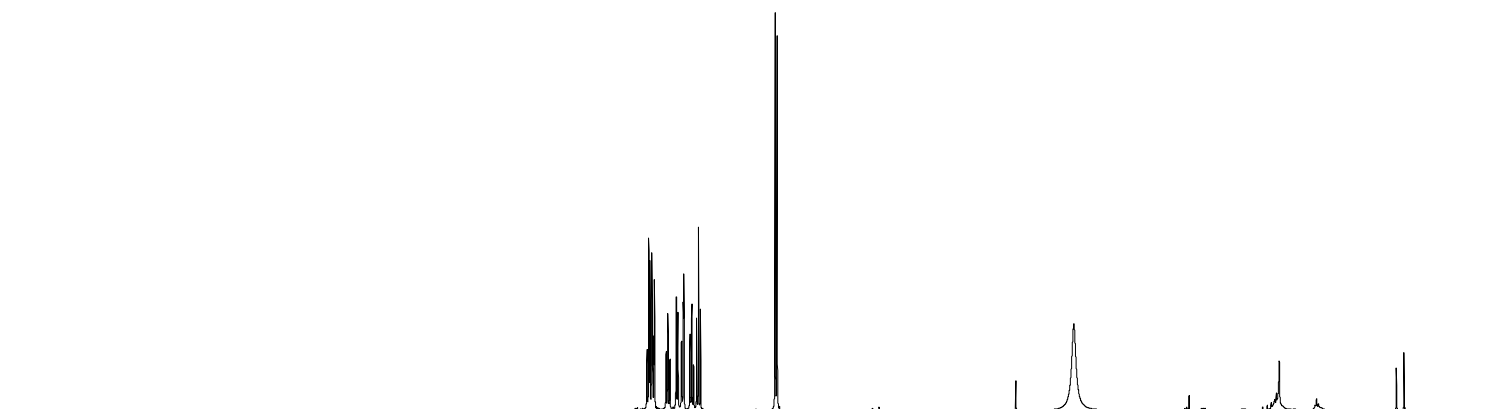

13 12 11 10 9 8 7 6 5 4 3 2 1 0 ppm

3.03  
1.03  
1.01  
1.26  
1.02  
1.00  
2.01

4.17

1d

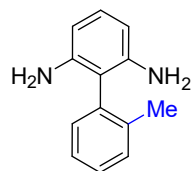

1d

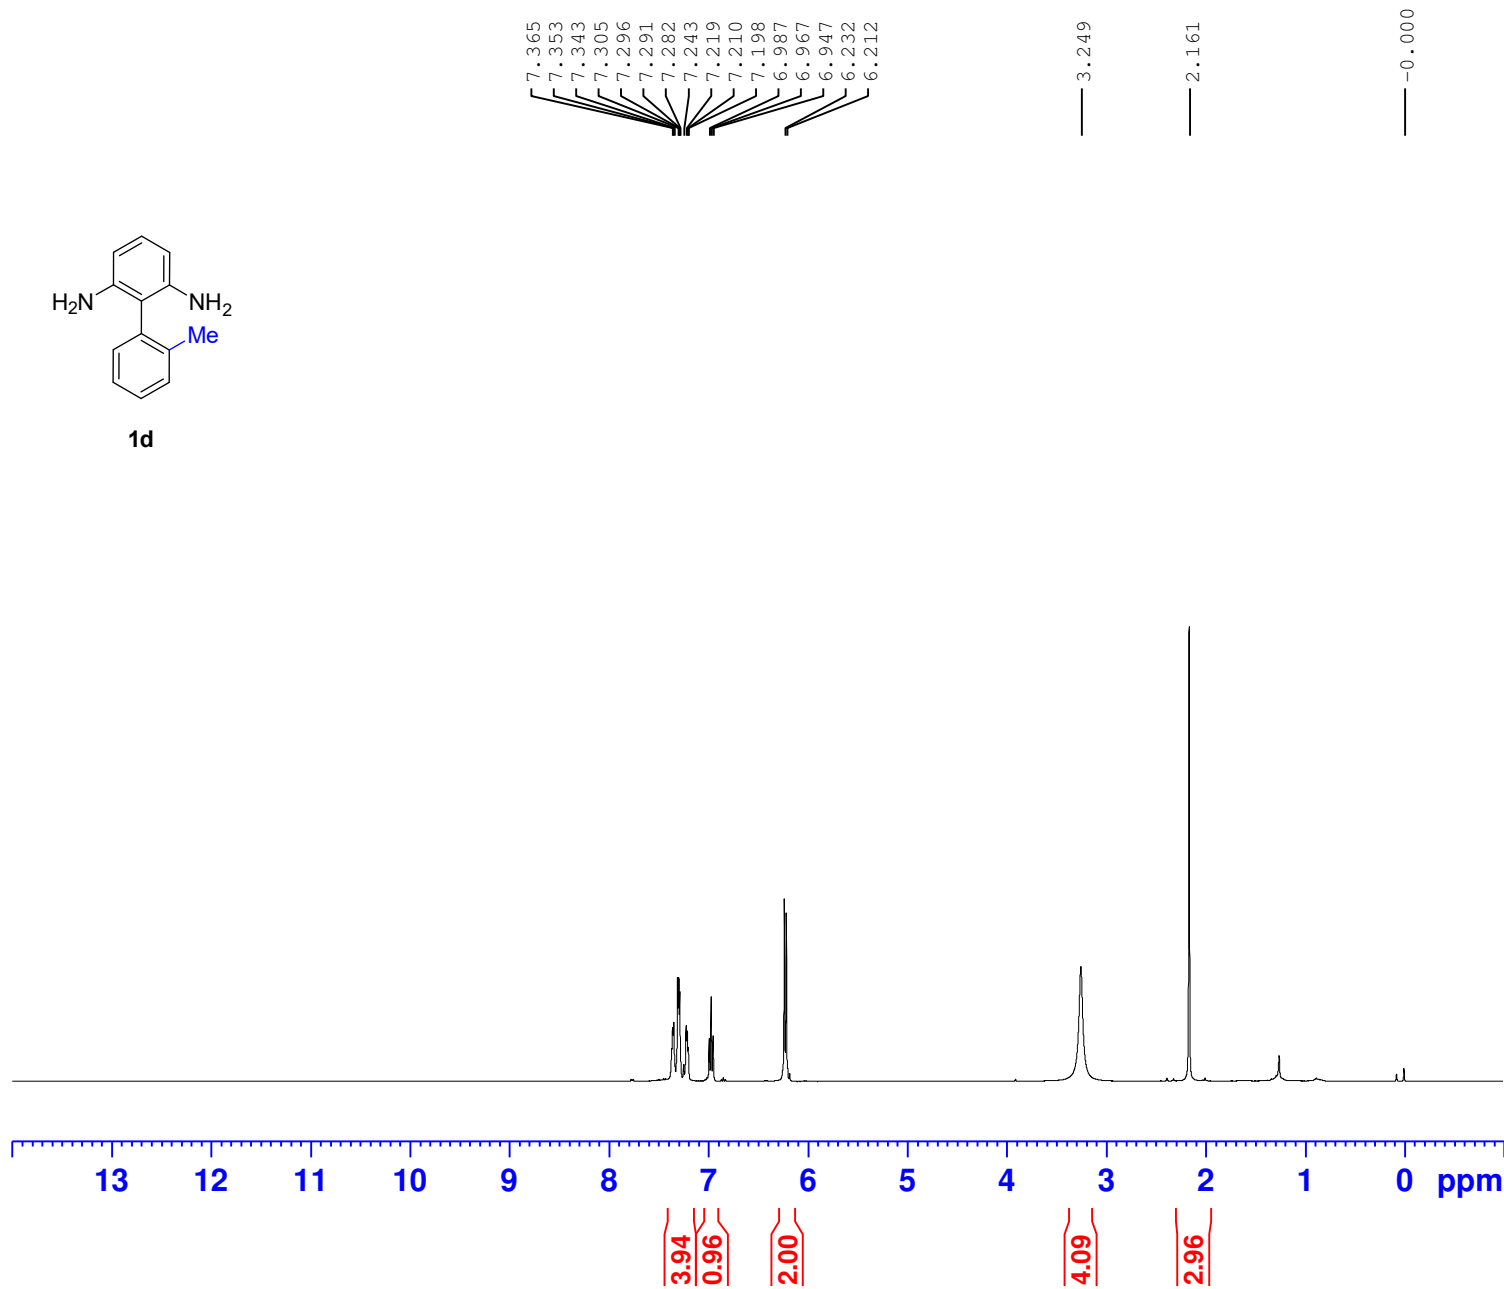

Current Data Parameters  
NAME 20240522-400  
EXPNO 24  
PROCNO 1

F2 - Acquisition Parameters  
Date\_ 20240522  
Time 2.15  
INSTRUM spect  
PROBHD 5 mm PADUL 13C  
PULPROG zg30  
TD 65536  
SOLVENT CDCl3  
NS 8  
DS 2  
SWH 8223.685 Hz  
FIDRES 0.125483 Hz  
AQ 3.9845889 sec  
RG 75.43  
DW 60.800 usec  
DE 6.50 usec  
TE 292.1 K  
D1 1.00000000 sec  
TD0 1

===== CHANNEL f1 =====  
NUC1 1H  
P1 9.90 usec  
PLW1 23.00000000 W  
SFO1 400.1924713 MHz

F2 - Processing parameters  
SI 65536  
SF 400.1900207 MHz  
WDW EM  
SSB 0  
LB 0.30 Hz  
GB 0  
PC 1.00



1d

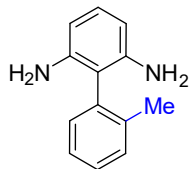

1d

144.46  
138.42  
134.46  
130.85  
130.74  
128.71  
128.20  
127.02  
113.24  
105.35

77.32  
77.00  
76.68

19.14

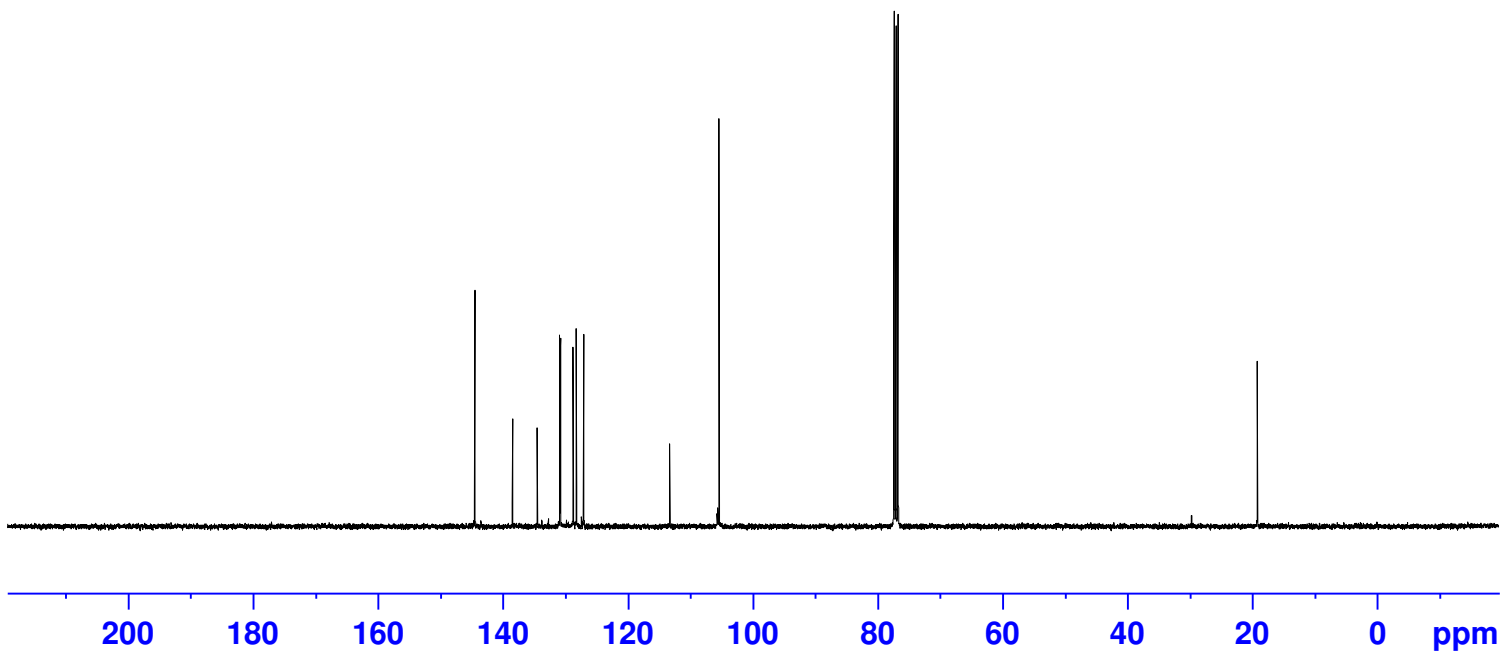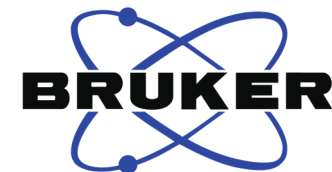

Current Data Parameters  
NAME 20240522-400  
EXPNO 25  
PROCNO 1

F2 - Acquisition Parameters  
Date\_ 20240522  
Time 2.45  
INSTRUM spect  
PROBHD 5 mm PADUL 13C  
PULPROG zgpg30  
TD 65536  
SOLVENT CDC13  
NS 500  
DS 4  
SWH 24038.461 Hz  
FIDRES 0.366798 Hz  
AQ 1.3631488 sec  
RG 35.06  
DW 20.800 usec  
DE 6.50 usec  
TE 292.5 K  
D1 2.00000000 sec  
D11 0.03000000 sec  
TD0 1

=====  
CHANNEL f1  
NUC1 13C  
P1 9.80 usec  
PLW1 47.40000153 W  
SFO1 100.6379178 MHz

=====  
CHANNEL f2  
CPDPRG[2] waltz16  
NUC2 1H  
PCPD2 90.00 usec  
PLW2 23.00000000 W  
PLW12 0.30712000 W  
PLW13 0.24877000 W  
SFO2 400.1916008 MHz

F2 - Processing parameters  
SI 32768  
SF 100.6278667 MHz  
WDW EM  
SSB 0  
LB 1.00 Hz  
GB 0  
PC 1.40

1e

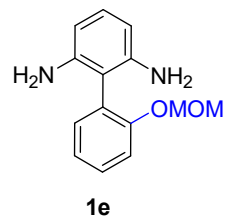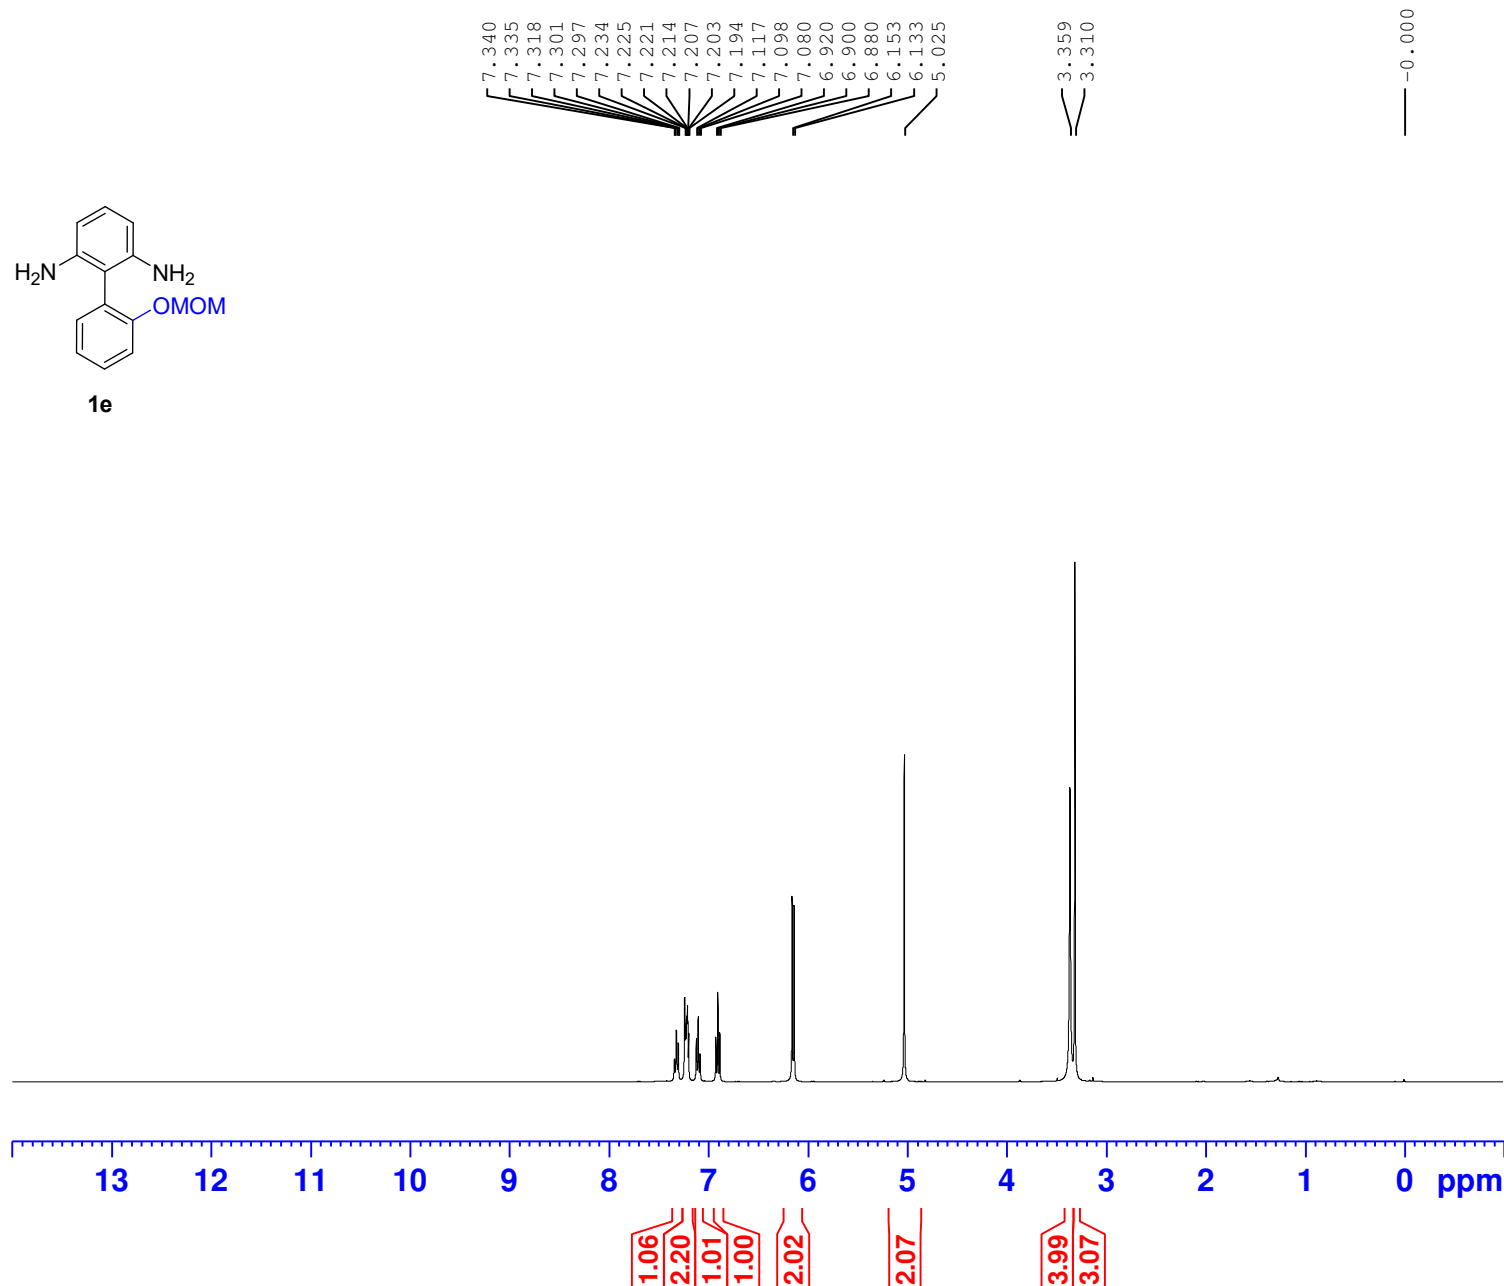

Current Data Parameters  
NAME 20231129-400  
EXPNO 17  
PROCNO 1

F2 - Acquisition Parameters  
Date\_ 20231129  
Time 0.31  
INSTRUM spect  
PROBHD 5 mm PADUL 13C  
PULPROG zg30  
TD 65536  
SOLVENT CDC13  
NS 8  
DS 2  
SWH 8223.685 Hz  
FIDRES 0.125483 Hz  
AQ 3.9845889 sec  
RG 17.43  
DW 60.800 usec  
DE 6.50 usec  
TE 292.5 K  
D1 1.00000000 sec  
TD0 1

==== CHANNEL f1 =====  
NUC1 1H  
P1 9.90 usec  
PLW1 23.00000000 W  
SFO1 400.1924713 MHz

F2 - Processing parameters  
SI 65536  
SF 400.1900402 MHz  
WDW EM  
SSB 0  
LB 0.30 Hz  
GB 0  
PC 1.00

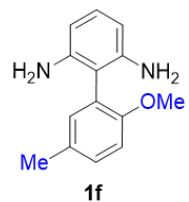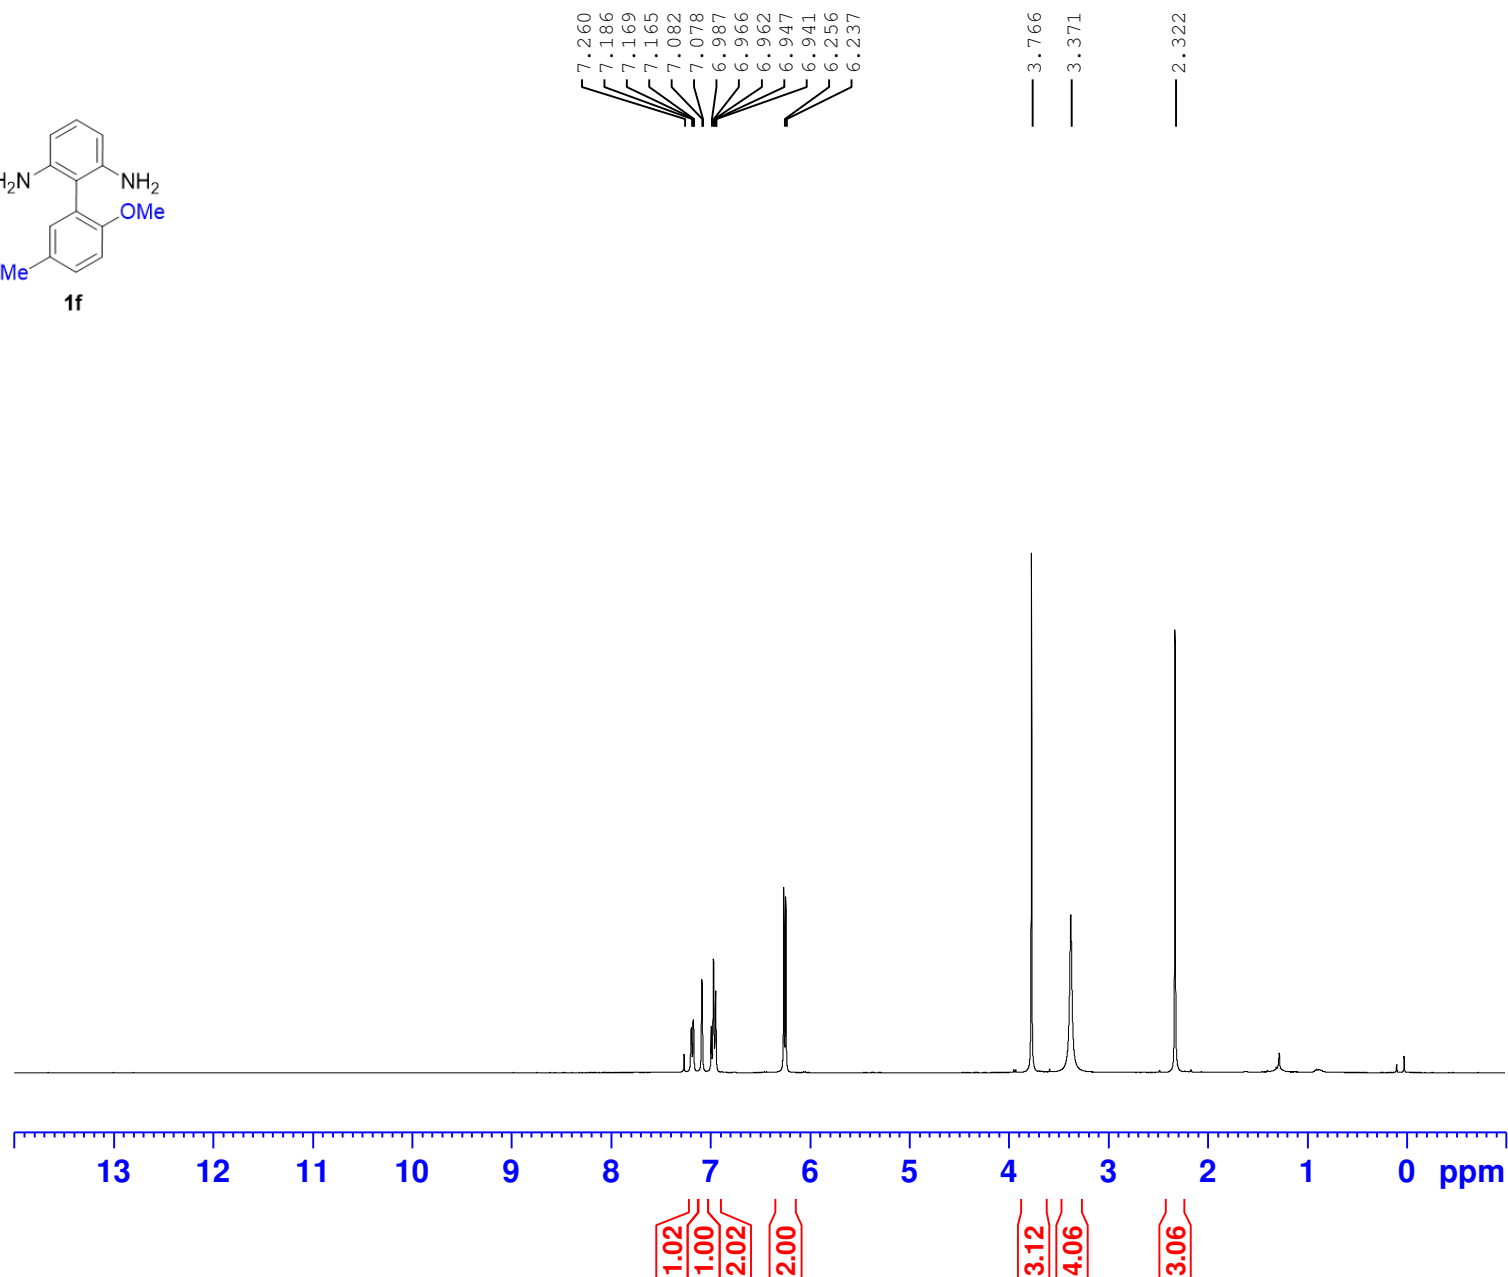

Current Data Parameters  
 NAME 20231228-400  
 EXPNO 27  
 PROCNO 1

F2 - Acquisition Parameters  
 Date\_ 20231227  
 Time 23.58  
 INSTRUM spect  
 PROBHD 5 mm PADUL 13C  
 PULPROG zg30  
 TD 65536  
 SOLVENT CDCl3  
 NS 6  
 DS 2  
 SWH 8223.685 Hz  
 FIDRES 0.125483 Hz  
 AQ 3.9845889 sec  
 RG 68.24  
 DW 60.800 usec  
 DE 6.50 usec  
 TE 293.1 K  
 D1 1.00000000 sec  
 TD0 1

==== CHANNEL f1 =====  
 NUC1 1H  
 P1 9.90 usec  
 PLW1 23.00000000 W  
 SFO1 400.1924713 MHz

F2 - Processing parameters  
 SI 65536  
 SF 400.1900139 MHz  
 WDW EM  
 SSB 0  
 LB 0.30 Hz  
 GB 0  
 PC 1.00

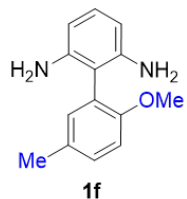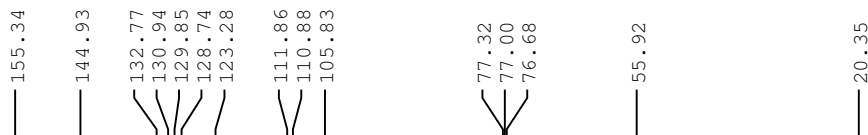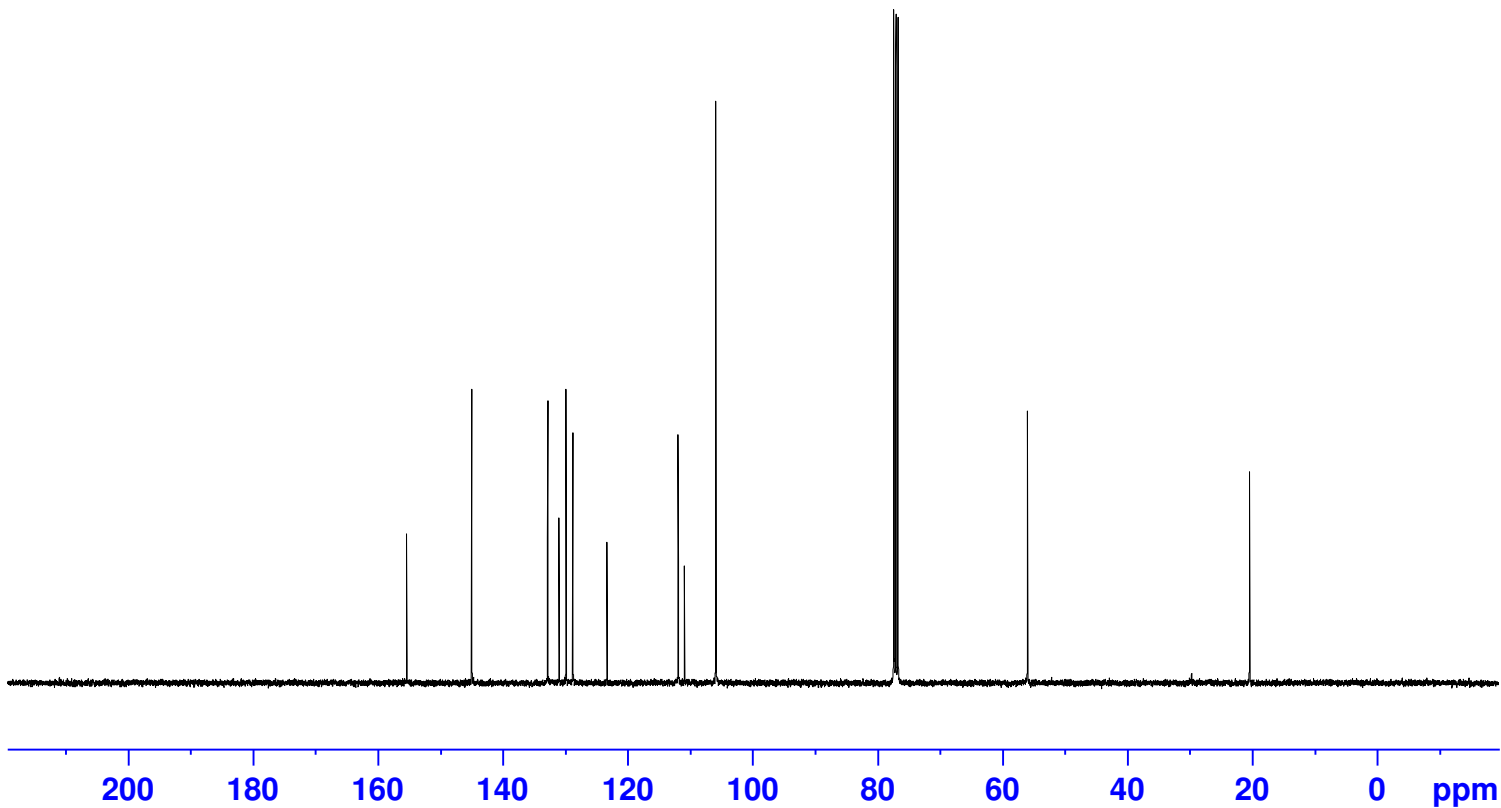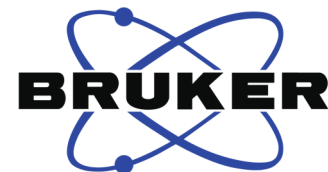

Current Data Parameters  
 NAME 20231228-400  
 EXPNO 28  
 PROCNO 1

F2 - Acquisition Parameters  
 Date\_ 20231228  
 Time 0.28  
 INSTRUM spect  
 PROBHD 5 mm PADUL 13C  
 PULPROG zgpg30  
 TD 65536  
 SOLVENT CDC13  
 NS 500  
 DS 4  
 SWH 24038.461 Hz  
 FIDRES 0.366798 Hz  
 AQ 1.3631488 sec  
 RG 61.19  
 DW 20.800 usec  
 DE 6.50 usec  
 TE 293.7 K  
 D1 2.00000000 sec  
 D11 0.03000000 sec  
 TD0 1

==== CHANNEL f1 =====  
 NUC1 13C  
 P1 9.80 usec  
 PLW1 47.40000153 W  
 SFO1 100.6379178 MHz

==== CHANNEL f2 =====  
 CPDPRG[2] waltz16  
 NUC2 1H  
 PCPD2 90.00 usec  
 PLW2 23.00000000 W  
 PLW12 0.30712000 W  
 PLW13 0.24877000 W  
 SFO2 400.1916008 MHz

F2 - Processing parameters  
 SI 32768  
 SF 100.6278688 MHz  
 WDW EM  
 SSB 0  
 LB 1.00 Hz  
 GB 0  
 PC 1.40

1j

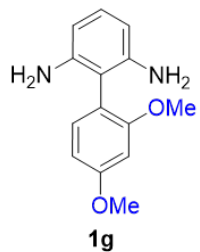

7.260  
7.180  
7.169  
7.158  
6.978  
6.959  
6.939  
6.646  
6.640  
6.634  
6.629  
6.624  
6.618  
6.242  
6.222

3.865  
3.767  
3.401

Current Data Parameters  
NAME 20231227-400  
EXPNO 28  
PROCNO 1

F2 - Acquisition Parameters  
Date\_ 20231227  
Time 0.12  
INSTRUM spect  
PROBHD 5 mm PADUL 13C  
PULPROG zg30  
TD 65536  
SOLVENT CDC13  
NS 10  
DS 2  
SWH 8223.685 Hz  
FIDRES 0.125483 Hz  
AQ 3.9845889 sec  
RG 29.75  
DW 60.800 usec  
DE 6.50 usec  
TE 291.7 K  
D1 1.00000000 sec  
TD0 1

==== CHANNEL f1 =====  
NUC1 1H  
P1 9.90 usec  
PLW1 23.00000000 W  
SFO1 400.1924713 MHz

F2 - Processing parameters  
SI 65536  
SF 400.1900136 MHz  
WDW EM  
SSB 0  
LB 0.30 Hz  
GB 0  
PC 1.00

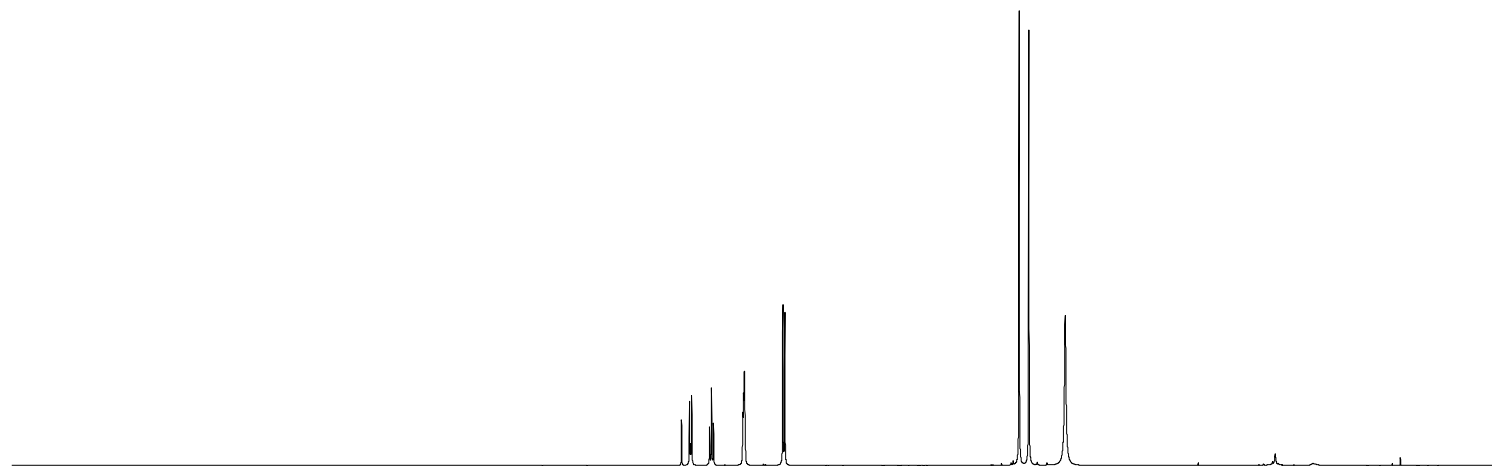

13 12 11 10 9 8 7 6 5 4 3 2 1 0 ppm

1.00  
1.00  
2.00  
2.03

3.09  
3.04  
4.04

1j

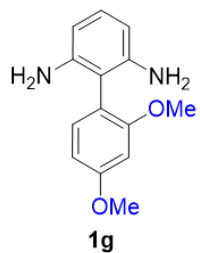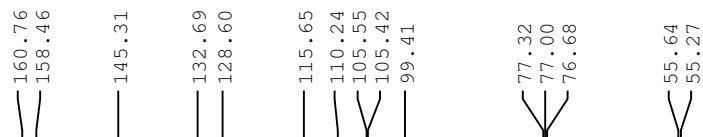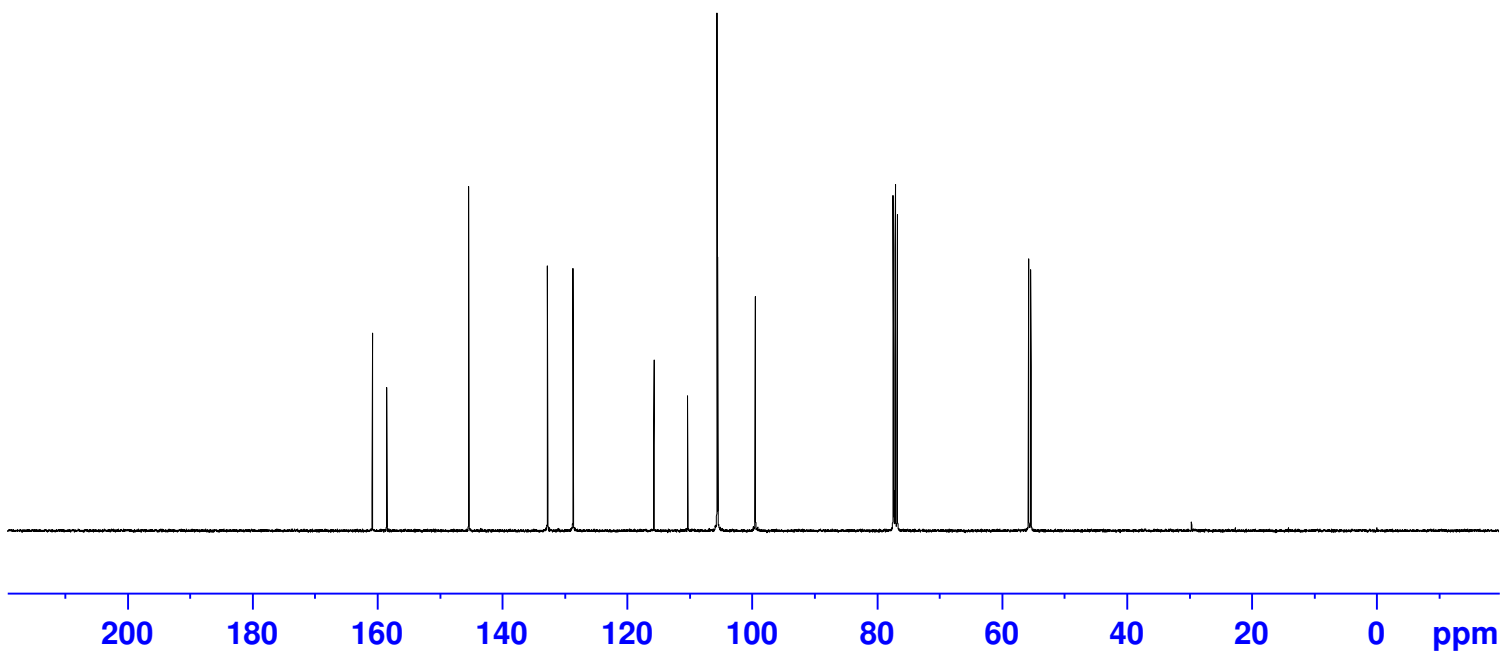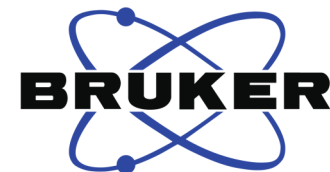

Current Data Parameters  
NAME 20231227-400  
EXPNO 29  
PROCNO 1

## F2 - Acquisition Parameters

Date\_ 20231227  
Time 0.59  
INSTRUM spect  
PROBHD 5 mm PADUL 13C  
PULPROG zgpg30  
TD 65536  
SOLVENT CDC13  
NS 800  
DS 4  
SWH 24038.461 Hz  
FIDRES 0.366798 Hz  
AQ 1.3631488 sec  
RG 37.77  
DW 20.800 usec  
DE 6.50 usec  
TE 292.3 K  
D1 2.00000000 sec  
D11 0.03000000 sec  
TD0 1

## ===== CHANNEL f1 =====

NUC1 13C  
P1 9.80 usec  
PLW1 47.40000153 W  
SFO1 100.6379178 MHz

## ===== CHANNEL f2 =====

CPDPRG[2] waltz16  
NUC2 1H  
PCPD2 90.00 usec  
PLW2 23.00000000 W  
PLW12 0.30712000 W  
PLW13 0.24877000 W  
SFO2 400.1916008 MHz

## F2 - Processing parameters

SI 32768  
SF 100.6278789 MHz  
WDW EM  
SSB 0  
LB 1.00 Hz  
GB 0  
PC 1.40

1f

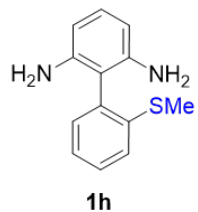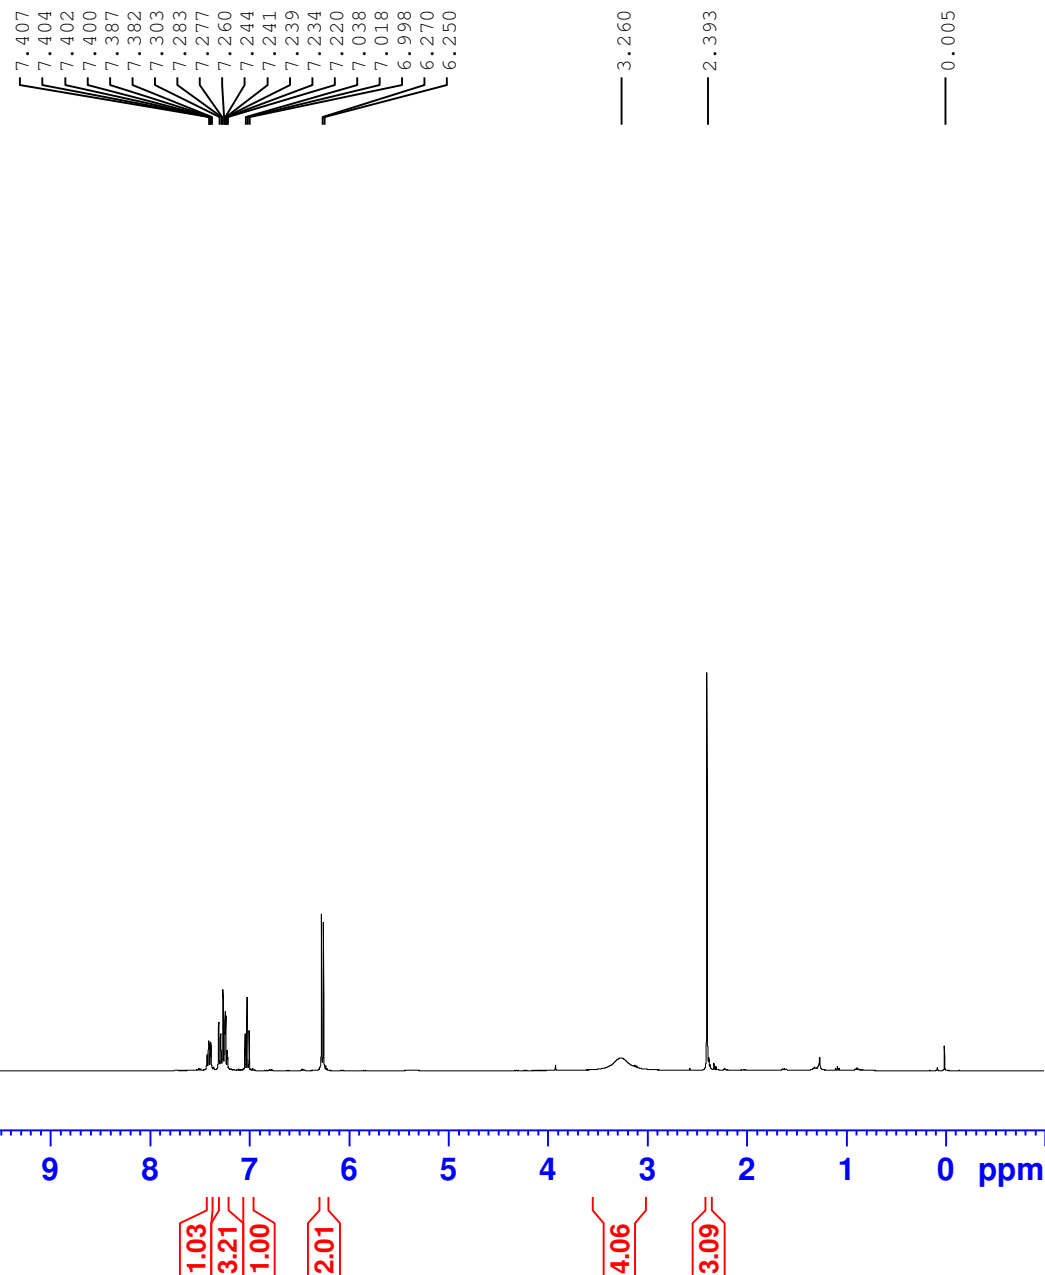

Current Data Parameters  
NAME 20231128-400  
EXPNO 10  
PROCNO 1

F2 - Acquisition Parameters  
Date\_ 20231127  
Time 22.43  
INSTRUM spect  
PROBHD 5 mm PADUL 13C  
PULPROG zg30  
TD 65536  
SOLVENT CDCl3  
NS 8  
DS 2  
SWH 8223.685 Hz  
FIDRES 0.125483 Hz  
AQ 3.9845889 sec  
RG 100.49  
DW 60.800 usec  
DE 6.50 usec  
TE 291.8 K  
D1 1.00000000 sec  
TD0 1

==== CHANNEL f1 =====  
NUC1 1H  
P1 9.90 usec  
PLW1 23.00000000 W  
SFO1 400.1924713 MHz

F2 - Processing parameters  
SI 65536  
SF 400.1900139 MHz  
WDW EM  
SSB 0  
LB 0.30 Hz  
GB 0  
PC 1.00

1g

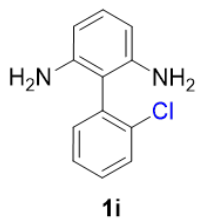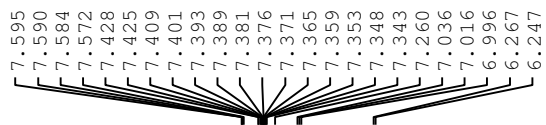

3.359

Current Data Parameters  
NAME 20231118-400M  
EXPNO 33  
PROCNO 1

F2 - Acquisition Parameters  
Date\_ 20231118  
Time 3.52  
INSTRUM spect  
PROBHD 5 mm PADUL 13C  
PULPROG zg30  
TD 65536  
SOLVENT CDC13  
NS 6  
DS 2  
SWH 8223.685 Hz  
FIDRES 0.125483 Hz  
AQ 3.9845889 sec  
RG 113.67  
DW 60.800 usec  
DE 6.50 usec  
TE 294.5 K  
D1 1.00000000 sec  
TD0 1

==== CHANNEL f1 =====  
NUC1 1H  
P1 9.90 usec  
PLW1 23.00000000 W  
SFO1 400.1924713 MHz

F2 - Processing parameters  
SI 65536  
SF 400.1900139 MHz  
WDW EM  
SSB 0  
LB 0.30 Hz  
GB 0  
PC 1.00

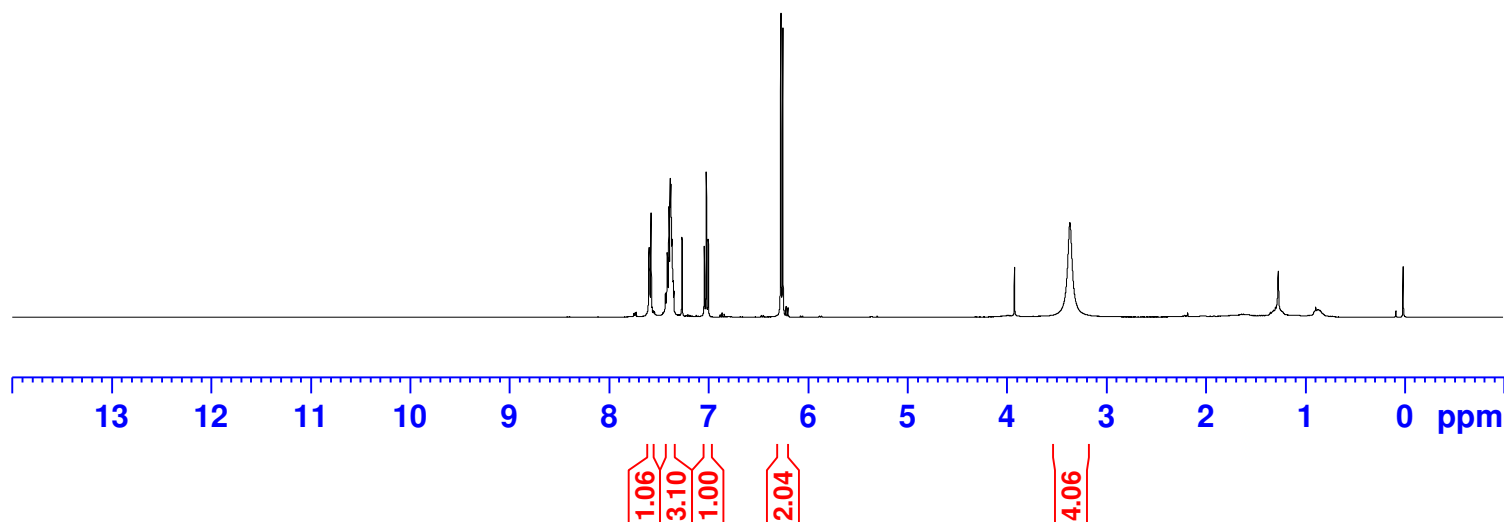



1h

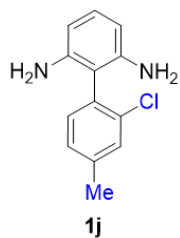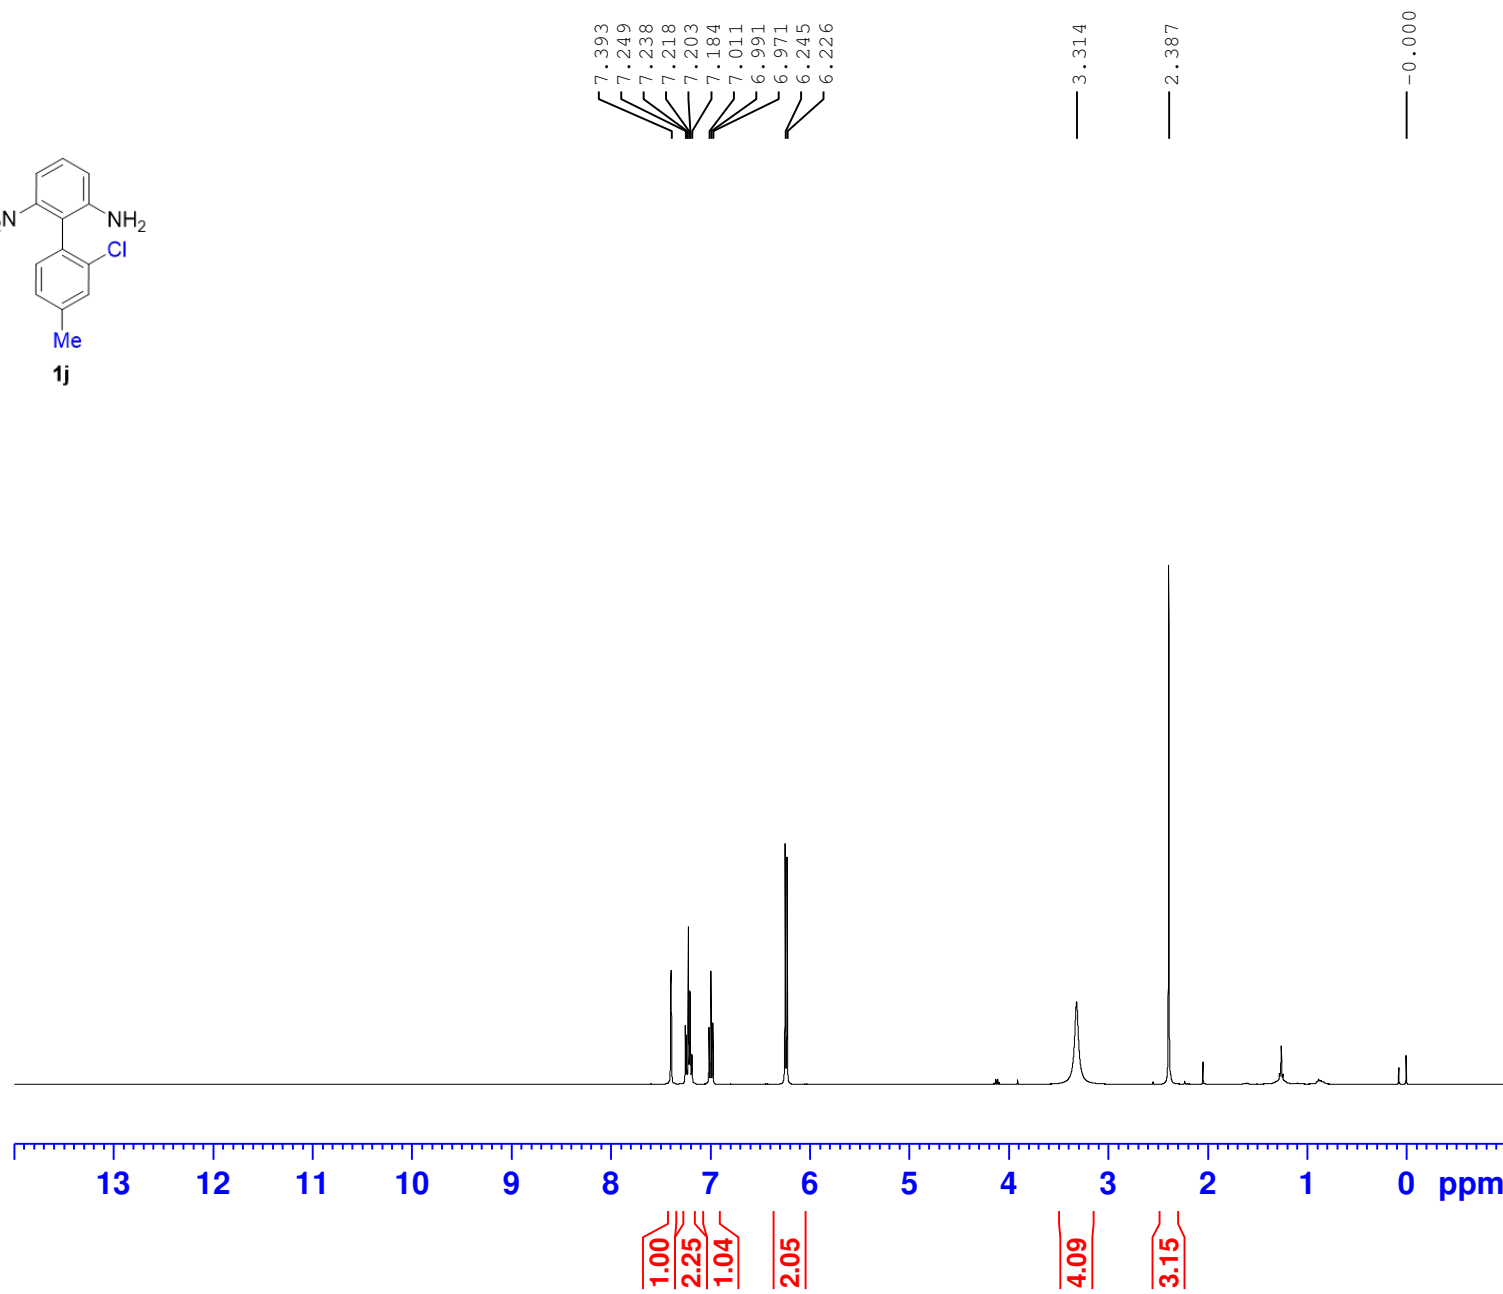

Current Data Parameters  
NAME 20231221-400  
EXPNO 10  
PROCNO 1

F2 - Acquisition Parameters  
Date\_ 20231220  
Time 23.12  
INSTRUM spect  
PROBHD 5 mm PADUL 13C  
PULPROG zg30  
TD 65536  
SOLVENT CDC13  
NS 8  
DS 2  
SWH 8223.685 Hz  
FIDRES 0.125483 Hz  
AQ 3.9845889 sec  
RG 90.23  
DW 60.800 usec  
DE 6.50 usec  
TE 292.9 K  
D1 1.00000000 sec  
TD0 1

==== CHANNEL f1 =====  
NUC1 1H  
P1 9.90 usec  
PLW1 23.00000000 W  
SFO1 400.1924713 MHz

F2 - Processing parameters  
SI 65536  
SF 400.1900182 MHz  
WDW EM  
SSB 0  
LB 0.30 Hz  
GB 0  
PC 1.00

1h

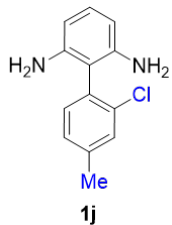

144.76  
139.89  
134.81  
132.37  
130.90  
130.84  
129.36  
128.96

111.48  
105.63

77.32  
77.00  
76.68

20.94

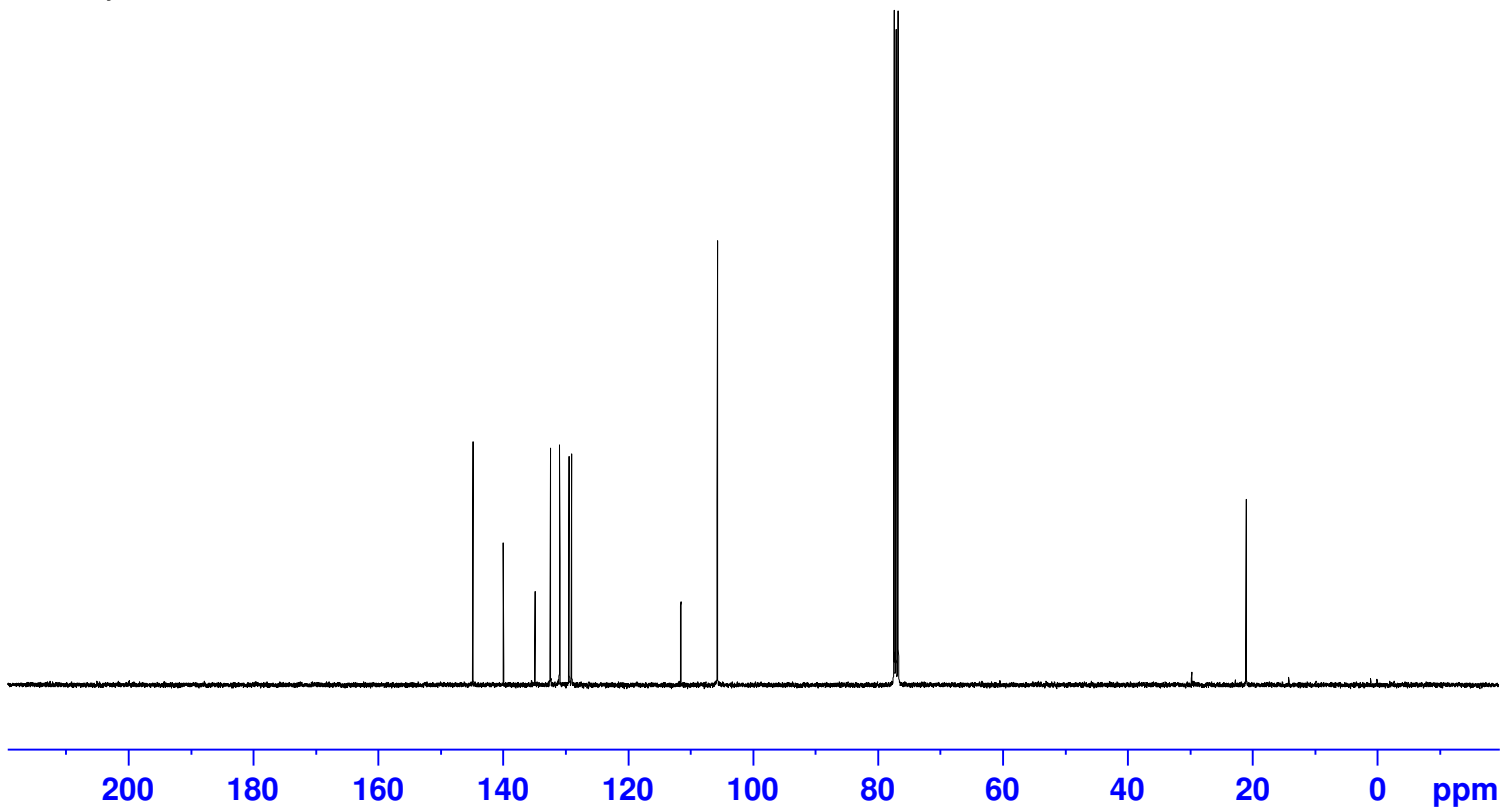

Current Data Parameters  
NAME 20231221-400  
EXPNO 11  
PROCNO 1

F2 - Acquisition Parameters  
Date\_ 20231220  
Time 23.58  
INSTRUM spect  
PROBHD 5 mm PADUL 13C  
PULPROG zgpg30  
TD 65536  
SOLVENT CDC13  
NS 800  
DS 4  
SWH 24038.461 Hz  
FIDRES 0.366798 Hz  
AQ 1.3631488 sec  
RG 35.06  
DW 20.800 usec  
DE 6.50 usec  
TE 293.6 K  
D1 2.00000000 sec  
D11 0.03000000 sec  
TD0 1

==== CHANNEL f1 =====  
NUC1 13C  
P1 9.80 usec  
PLW1 47.40000153 W  
SFO1 100.6379178 MHz

==== CHANNEL f2 =====  
CPDPRG[2] waltz16  
NUC2 1H  
PCPD2 90.00 usec  
PLW2 23.00000000 W  
PLW12 0.30712000 W  
PLW13 0.24877000 W  
SFO2 400.1916008 MHz

F2 - Processing parameters  
SI 32768  
SF 100.6278659 MHz  
WDW EM  
SSB 0  
LB 1.00 Hz  
GB 0  
PC 1.40

1k

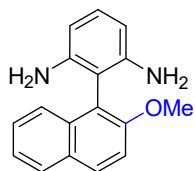

1k

7.955  
7.933  
7.863  
7.855  
7.846  
7.840  
7.524  
7.519  
7.509  
7.507  
7.502  
7.500  
7.493  
7.436  
7.419  
7.413  
7.402  
7.398  
7.393  
7.385  
7.377  
7.373  
7.369  
7.356  
7.352  
7.260  
7.097  
7.077  
7.057  
6.330  
3.907  
3.147

Current Data Parameters  
NAME 20231102-400m  
EXPNO 24  
PROCNO 1

F2 - Acquisition Parameters  
Date\_ 20231102  
Time 6.02  
INSTRUM spect  
PROBHD 5 mm PADUL 13C  
PULPROG zg30  
TD 65536  
SOLVENT CDC13  
NS 8  
DS 2  
SWH 8223.685 Hz  
FIDRES 0.125483 Hz  
AQ 3.9845889 sec  
RG 113.67  
DW 60.800 usec  
DE 6.50 usec  
TE 291.9 K  
D1 1.00000000 sec  
TD0 1

==== CHANNEL f1 =====  
NUC1 1H  
P1 9.90 usec  
PLW1 23.00000000 W  
SFO1 400.1924713 MHz

F2 - Processing parameters  
SI 65536  
SF 400.1900140 MHz  
WDW EM  
SSB 0  
LB 0.30 Hz  
GB 0  
PC 1.00

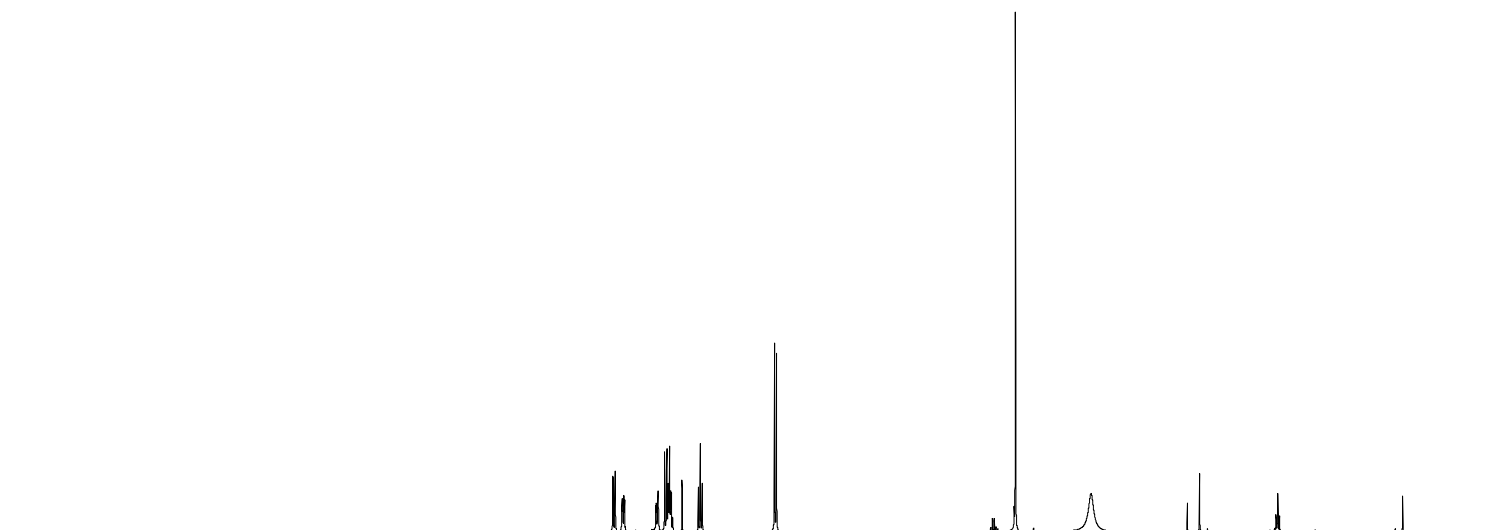

13 12 11 10 9 8 7 6 5 4 3 2 1 0 ppm

1.00  
1.00  
1.01  
3.01  
0.98  
2.00  
3.10  
4.14

1k



Current Data Parameters  
NAME 20231102-400m  
EXPNO 25  
PROCNO 1

F2 - Acquisition Parameters  
Date\_ 20231102  
Time 6.26  
INSTRUM spect  
PROBHD 5 mm PADUL 13C  
PULPROG zgpg30  
TD 65536  
SOLVENT CDC13  
NS 400  
DS 4  
SWH 24038.461 Hz  
FIDRES 0.366798 Hz  
AQ 1.3631488 sec  
RG 44.2  
DW 20.800 usec  
DE 6.50 usec  
TE 293.0 K  
D1 2.00000000 sec  
D11 0.03000000 sec  
TD0 1

==== CHANNEL f1 =====  
NUC1 13C  
P1 9.80 usec  
PLW1 47.40000153 W  
SFO1 100.6379178 MHz

==== CHANNEL f2 =====  
CPDPRG[2] waltz16  
NUC2 1H  
PCPD2 90.00 usec  
PLW2 23.00000000 W  
PLW12 0.30712000 W  
PLW13 0.24877000 W  
SFO2 400.1916008 MHz

F2 - Processing parameters  
SI 32768  
SF 100.6278653 MHz  
WDW EM  
SSB 0  
LB 1.00 Hz  
GB 0  
PC 1.40

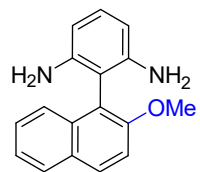

1k

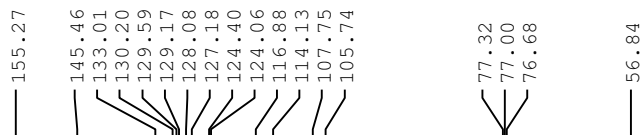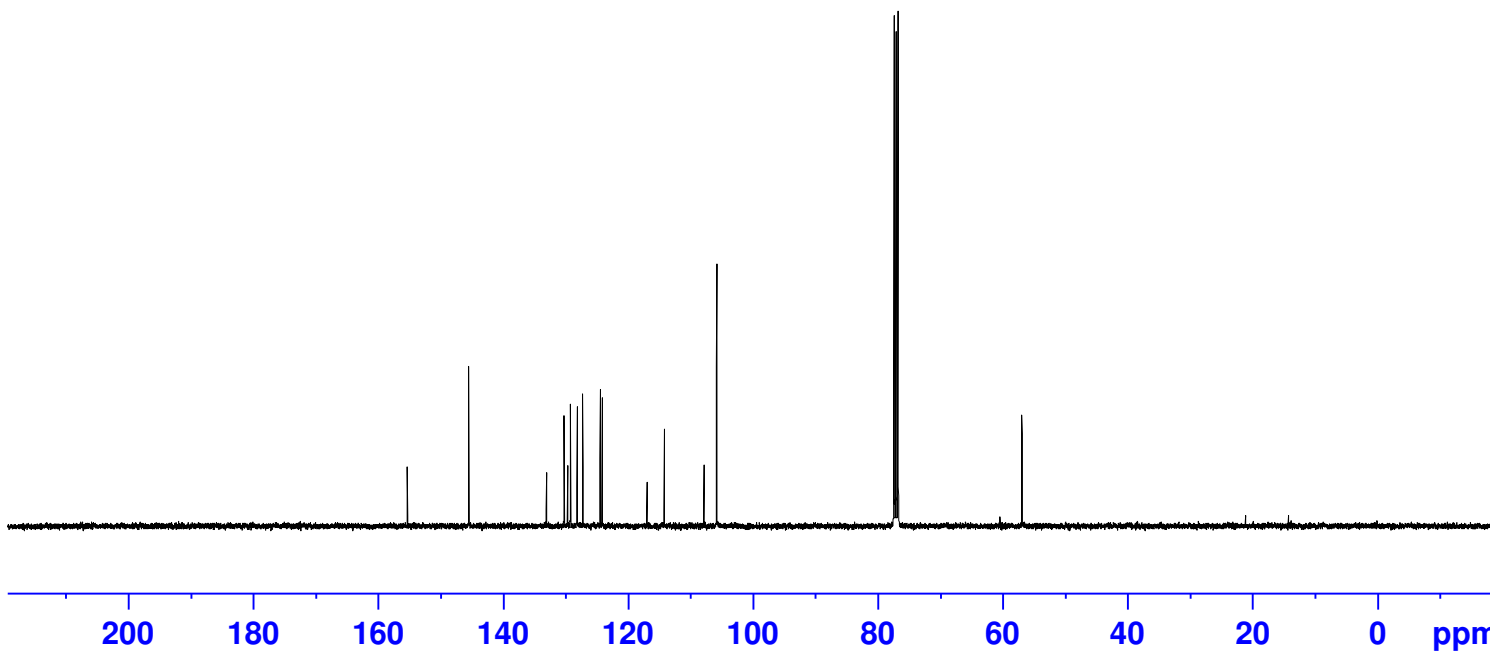

4a

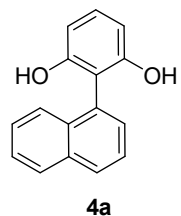

7.928  
7.907  
7.885  
7.601  
7.580  
7.569  
7.551  
7.531  
7.512  
7.510  
7.502  
7.499  
7.484  
7.482  
7.473  
7.470  
7.452  
7.435  
7.432  
7.239  
7.227  
7.219  
7.198  
6.634  
6.613  
4.716

0.000

Current Data Parameters  
NAME 20231212-400M  
EXPNO 13  
PROCNO 1

F2 - Acquisition Parameters  
Date\_ 20231212  
Time 21.36  
INSTRUM spect  
PROBHD 5 mm PADUL 13C  
PULPROG zg30  
TD 65536  
SOLVENT CDCl3  
NS 6  
DS 2  
SWH 8223.685 Hz  
FIDRES 0.125483 Hz  
AQ 3.9845889 sec  
RG 61.19  
DW 60.800 usec  
DE 6.50 usec  
TE 293.5 K  
D1 1.00000000 sec  
TD0 1

==== CHANNEL f1 =====  
NUC1 1H  
P1 9.90 usec  
PLW1 23.00000000 W  
SFO1 400.1924713 MHz

F2 - Processing parameters  
SI 65536  
SF 400.1900269 MHz  
WDW EM  
SSB 0  
LB 0.30 Hz  
GB 0  
PC 1.00

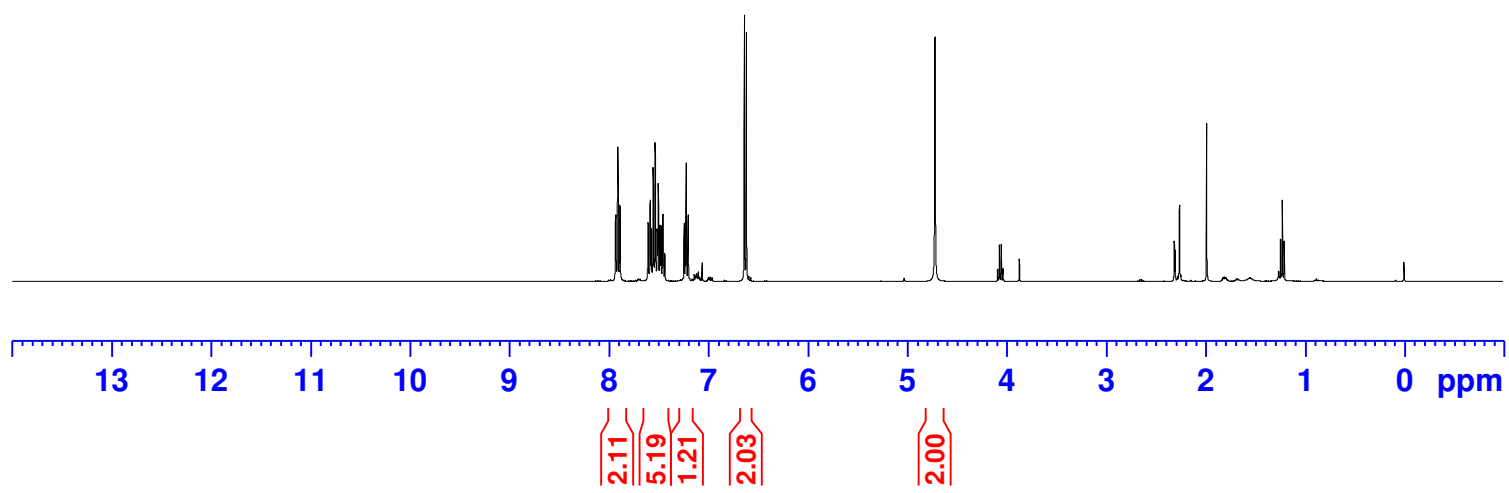

4b

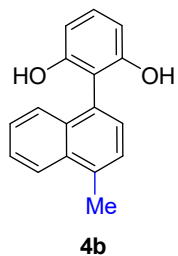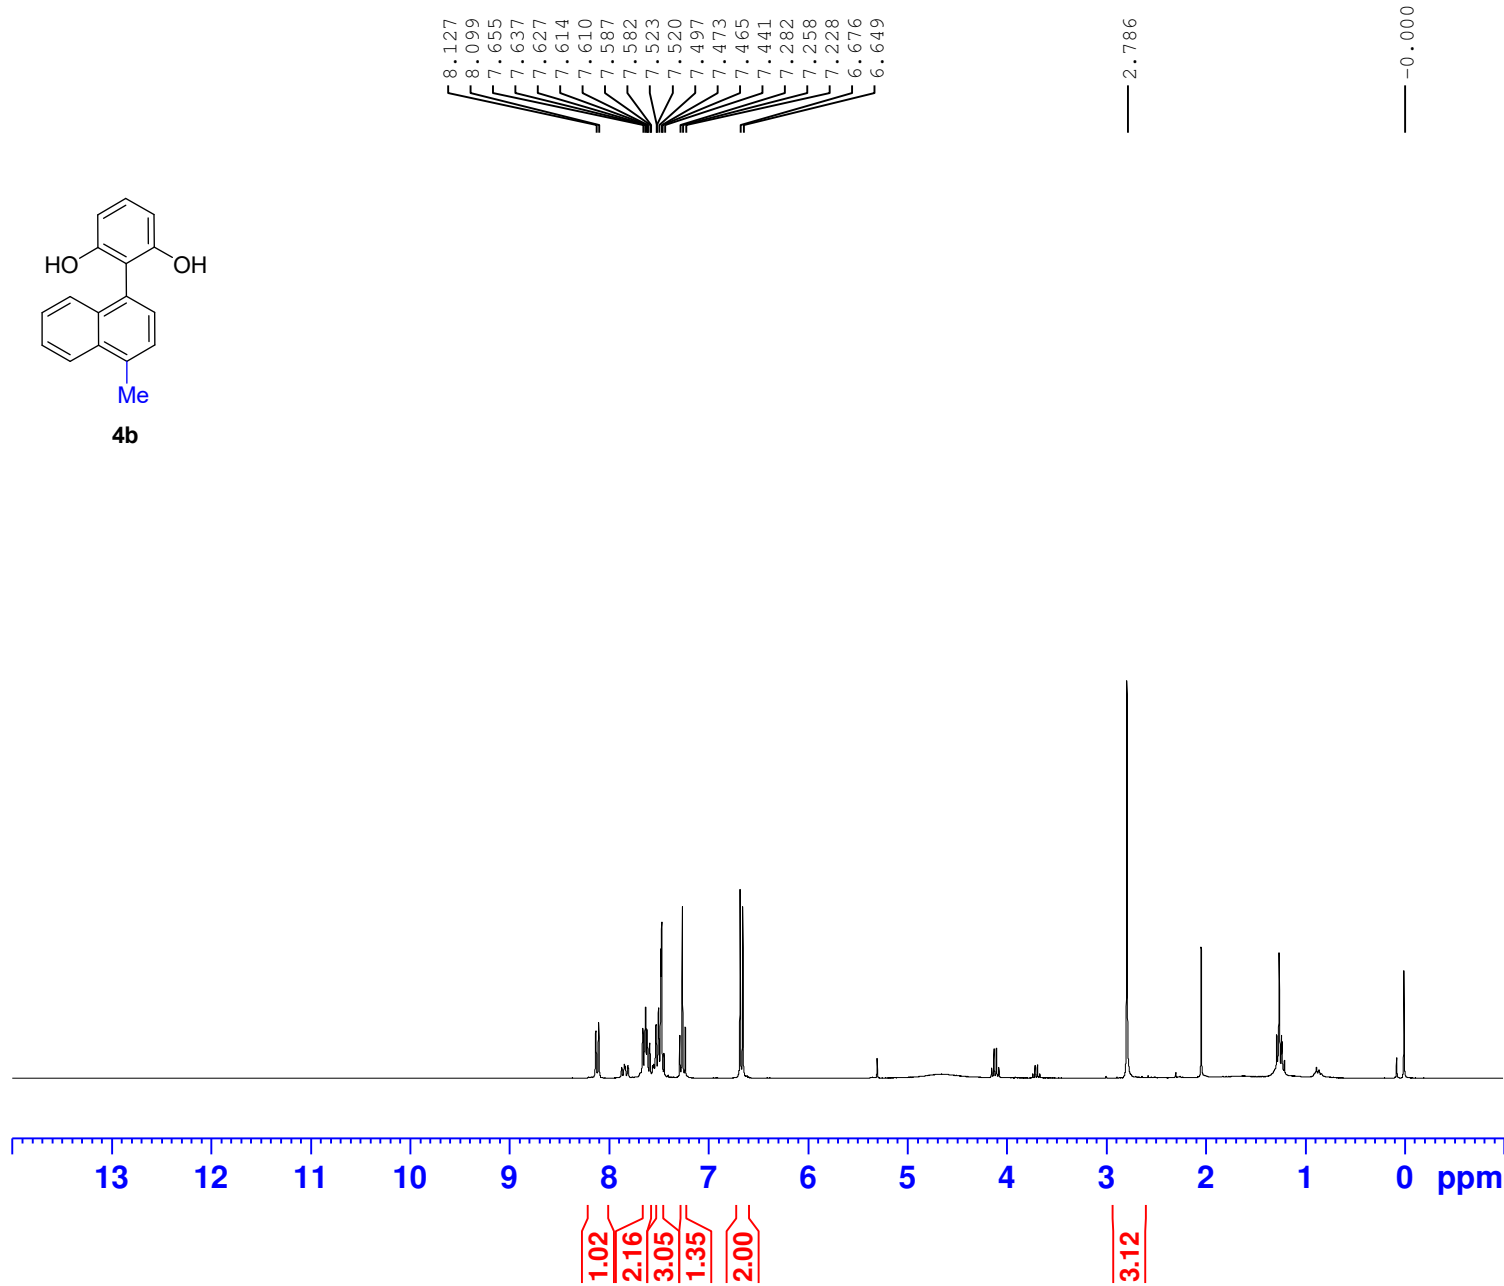

Current Data Parameters  
NAME 20240229-300  
EXPNO 1052  
PROCNO 1

F2 - Acquisition Parameters  
Date\_ 20240229  
Time 11.17 h  
INSTRUM spect  
PROBHD z104275\_0225 (  
PULPROG zg30  
TD 65536  
SOLVENT CDC13  
NS 16  
DS 2  
SWH 6009.615 Hz  
FIDRES 0.183399 Hz  
AQ 5.4525952 sec  
RG 203  
DW 83.200 usec  
DE 6.50 usec  
TE 288.1 K  
D1 1.00000000 sec  
TD0 1  
SFO1 300.1318533 MHz  
NUC1 1H  
P1 10.00 usec  
PLW1 14.00000000 W

F2 - Processing parameters  
SI 65536  
SF 300.1300080 MHz  
WDW EM  
SSB 0  
LB 0.30 Hz  
GB 0  
PC 1.00

4c

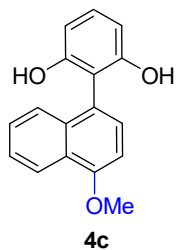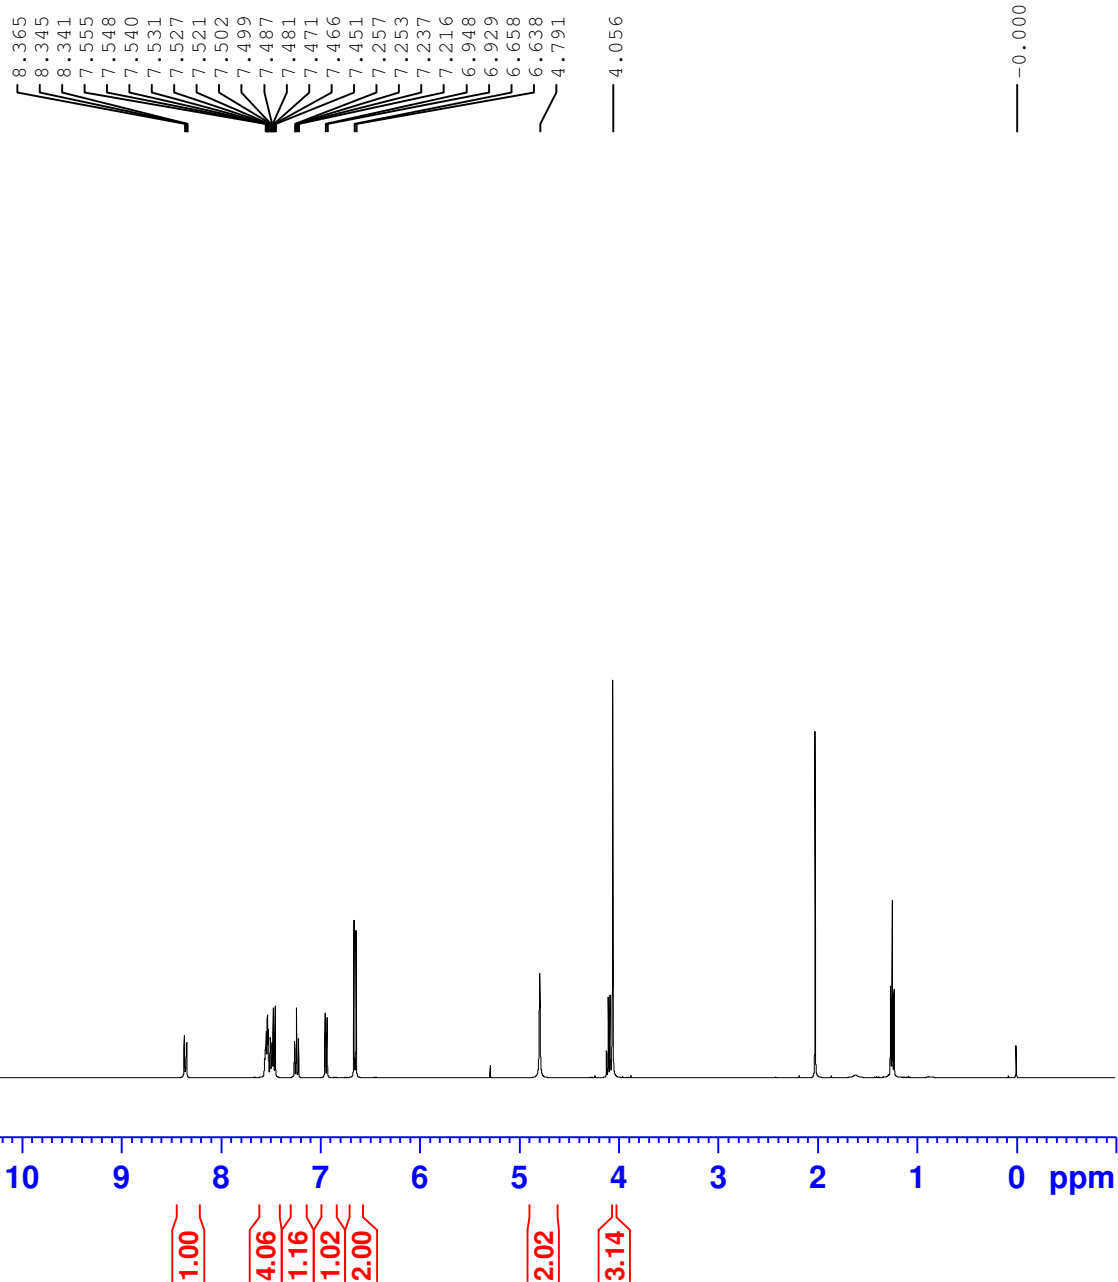

Current Data Parameters  
NAME 20240131  
EXPNO 13  
PROCNO 1

F2 - Acquisition Parameters  
Date\_ 20240130  
Time 22.18  
INSTRUM spect  
PROBHD 5 mm PADUL 13C  
PULPROG zg30  
TD 65536  
SOLVENT CDCl3  
NS 6  
DS 2  
SWH 8223.685 Hz  
FIDRES 0.125483 Hz  
AQ 3.9845889 sec  
RG 90.23  
DW 60.800 usec  
DE 6.50 usec  
TE 290.1 K  
D1 1.00000000 sec  
TD0 1

==== CHANNEL f1 =====  
NUC1 1H  
P1 9.90 usec  
PLW1 23.00000000 W  
SFO1 400.1924713 MHz

F2 - Processing parameters  
SI 65536  
SF 400.1900165 MHz  
WDW EM  
SSB 0  
LB 0.30 Hz  
GB 0  
PC 1.00

4d

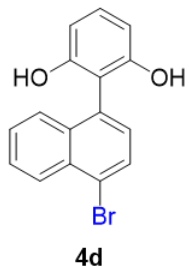

8.377  
8.355  
7.954  
7.936  
7.698  
7.695  
7.682  
7.678  
7.674  
7.660  
7.657  
7.641  
7.621  
7.560  
7.557  
7.543  
7.539  
7.536  
7.522  
7.519  
7.413  
7.394  
7.283  
7.263  
7.257  
7.242  
6.662  
6.642  
4.609

-0.000

Current Data Parameters  
NAME 20240110-400  
EXPNO 4  
PROCNO 1

F2 - Acquisition Parameters  
Date\_ 20240109  
Time 21.38  
INSTRUM spect  
PROBHD 5 mm PADUL 13C  
PULPROG zg30  
TD 65536  
SOLVENT CDC13  
NS 8  
DS 2  
SWH 8223.685 Hz  
FIDRES 0.125483 Hz  
AQ 3.9845889 sec  
RG 193.13  
DW 60.800 usec  
DE 6.50 usec  
TE 292.0 K  
D1 1.00000000 sec  
TD0 1

==== CHANNEL f1 =====  
NUC1 1H  
P1 9.90 usec  
PLW1 23.00000000 W  
SFO1 400.1924713 MHz

F2 - Processing parameters  
SI 65536  
SF 400.1900150 MHz  
WDW EM  
SSB 0  
LB 0.30 Hz  
GB 0  
PC 1.00

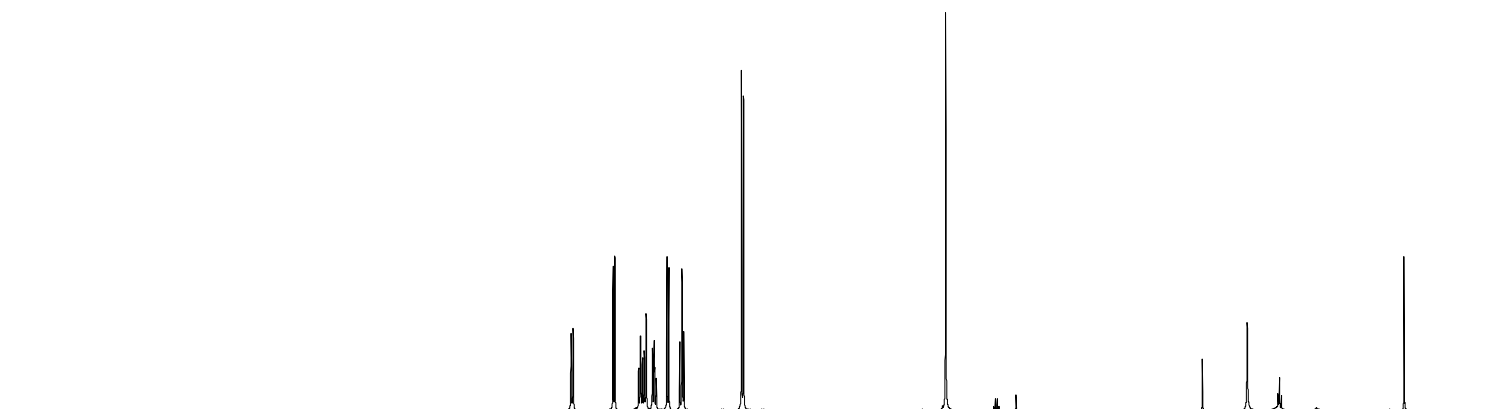

13 12 11 10 9 8 7 6 5 4 3 2 1 0 ppm

0.97  
1.00  
1.99  
1.03  
1.00  
1.30  
1.98

1.99



4e

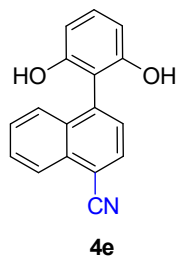

8.109  
8.089  
7.927  
7.909  
7.614  
7.607  
7.604  
7.593  
7.590  
7.586  
7.583  
7.569  
7.566  
7.440  
7.437  
7.419  
7.416  
7.401  
7.398  
7.386  
7.367  
7.033  
7.013  
6.993  
6.392  
6.372  
4.810

Current Data Parameters  
NAME 20240117-400  
EXPNO 7  
PROCNO 1

F2 - Acquisition Parameters  
Date\_ 20240116  
Time 21.59  
INSTRUM spect  
PROBHD 5 mm PADUL 13C  
PULPROG zg30  
TD 65536  
SOLVENT MeOD  
NS 8  
DS 2  
SWH 8223.685 Hz  
FIDRES 0.125483 Hz  
AQ 3.9845889 sec  
RG 181.41  
DW 60.800 usec  
DE 6.50 usec  
TE 291.0 K  
D1 1.00000000 sec  
TD0 1

==== CHANNEL f1 =====  
NUC1 1H  
P1 9.90 usec  
PLW1 23.00000000 W  
SFO1 400.1924713 MHz

F2 - Processing parameters  
SI 65536  
SF 400.1900555 MHz  
WDW EM  
SSB 0  
LB 0.30 Hz  
GB 0  
PC 1.00

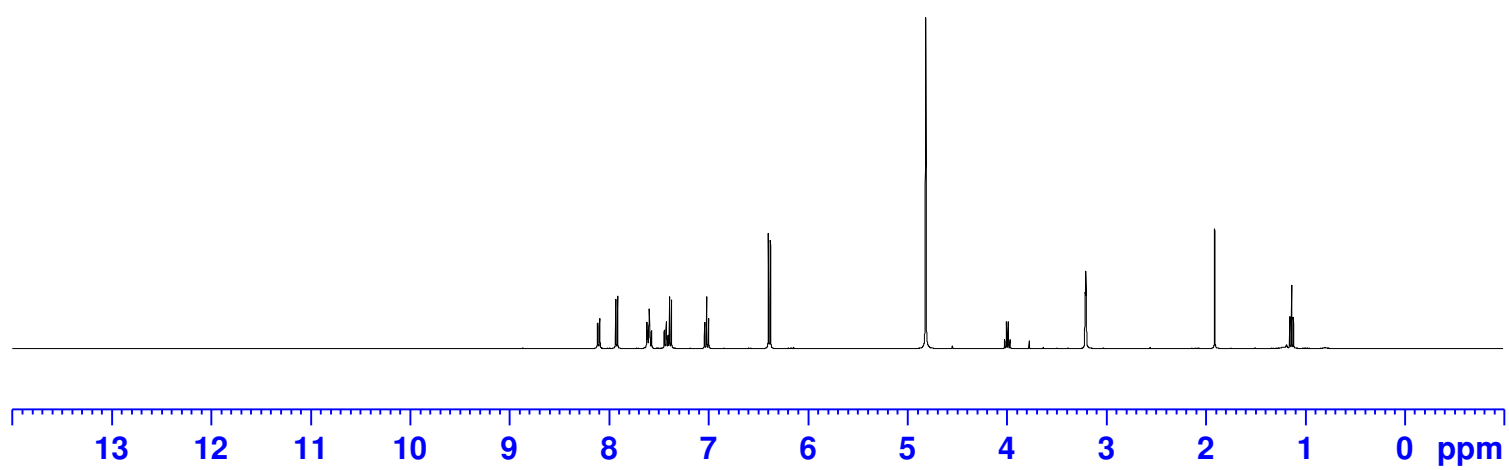

1.00  
1.00  
2.04  
2.03  
1.01  
1.99

4f

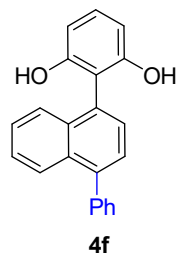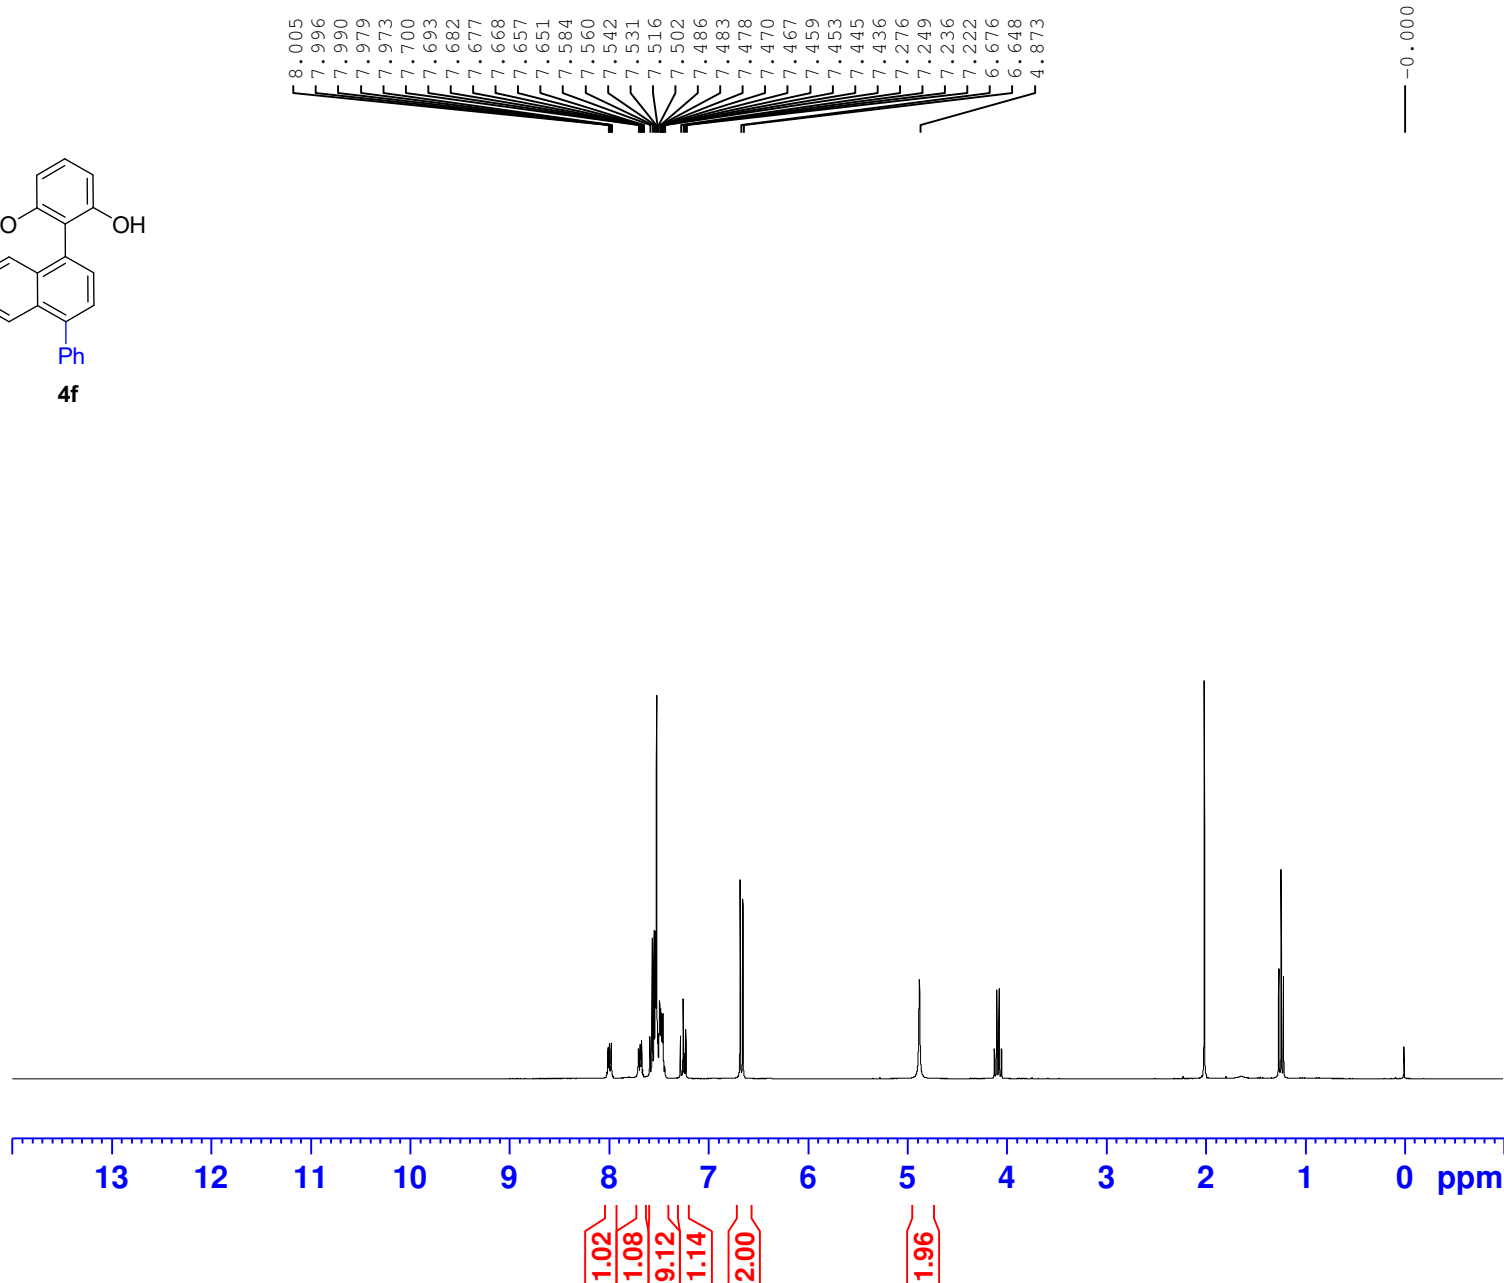

Current Data Parameters  
NAME 20240129-300M  
EXPNO 992  
PROCNO 1

F2 - Acquisition Parameters  
Date\_ 20240129  
Time 11.34 h  
INSTRUM spect  
PROBHD Z104275\_0225 (  
PULPROG zg30  
TD 65536  
SOLVENT CDC13  
NS 16  
DS 2  
SWH 6009.615 Hz  
FIDRES 0.183399 Hz  
AQ 5.4525952 sec  
RG 101  
DW 83.200 usec  
DE 6.50 usec  
TE 293.6 K  
D1 1.00000000 sec  
TD0 1  
SFO1 300.1318533 MHz  
NUC1 1H  
P1 10.00 usec  
PLW1 14.00000000 W

F2 - Processing parameters  
SI 65536  
SF 300.1300144 MHz  
WDW EM  
SSB 0  
LB 0.30 Hz  
GB 0  
PC 1.00

4g

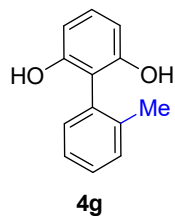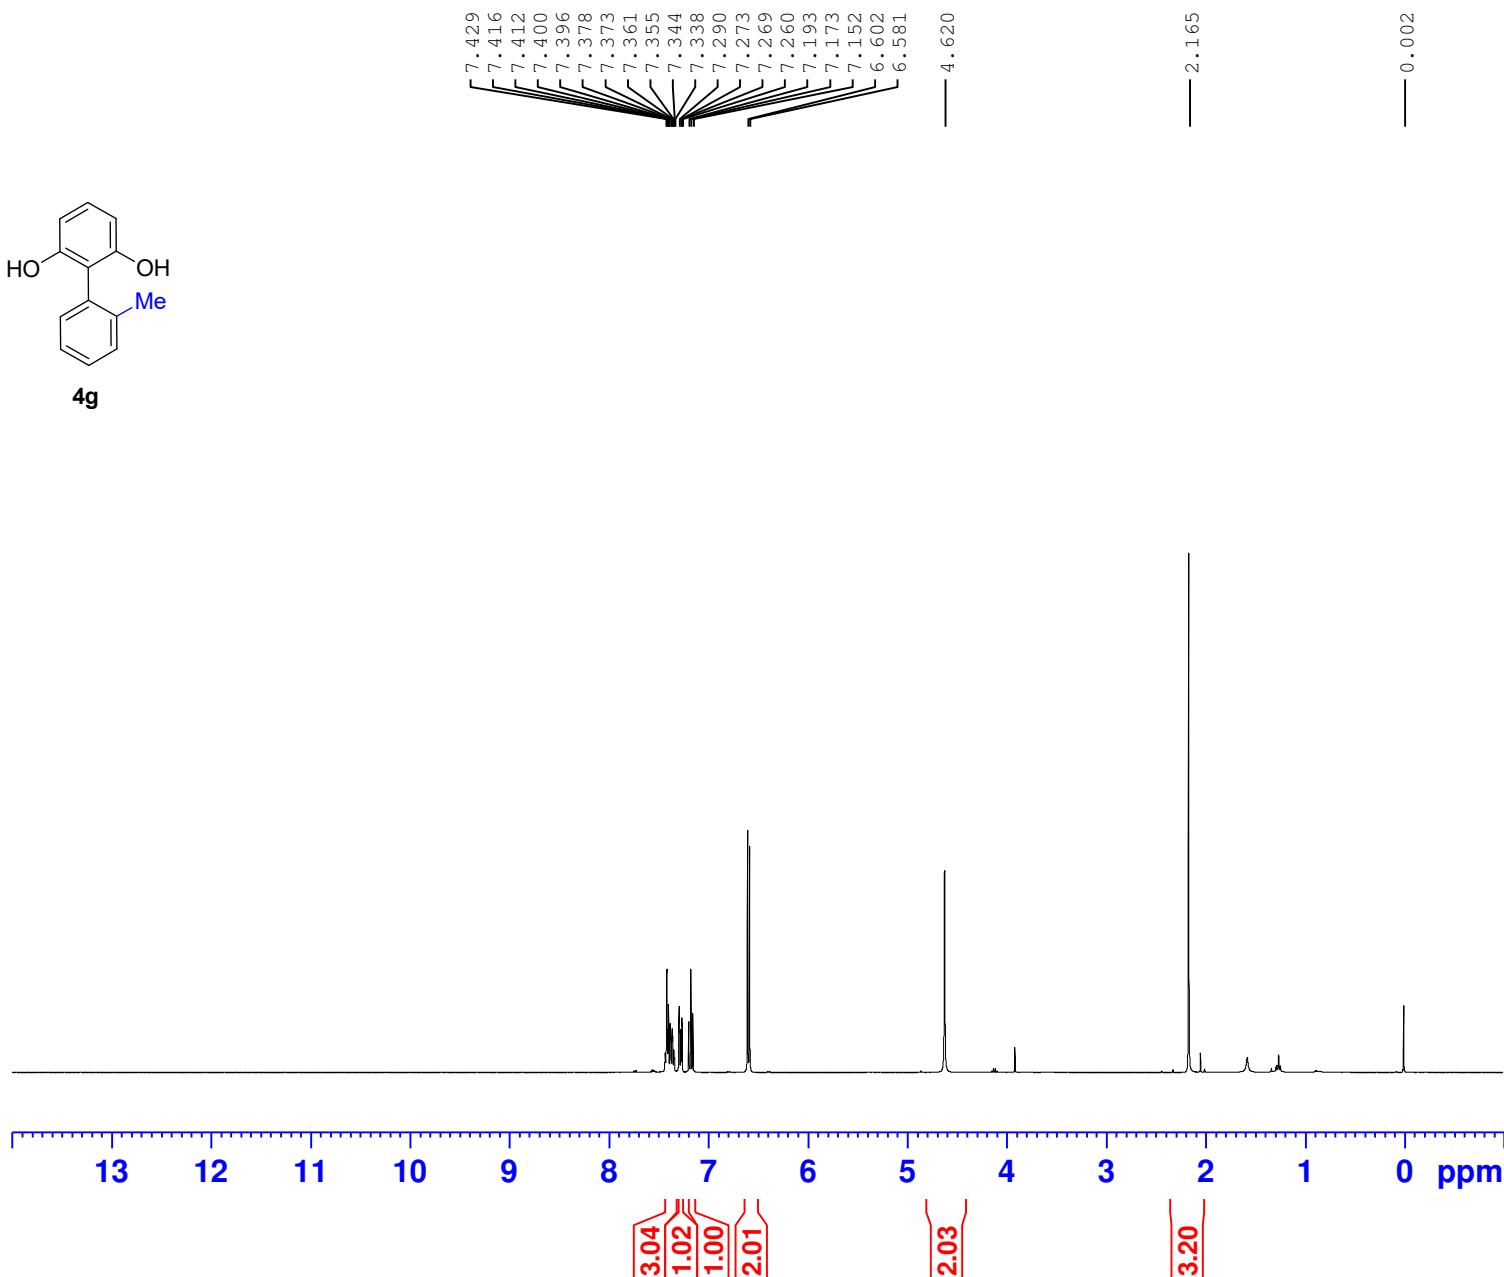

Current Data Parameters  
NAME 20240105-400  
EXPNO 4  
PROCNO 1

F2 - Acquisition Parameters  
Date\_ 20240104  
Time 21.55  
INSTRUM spect  
PROBHD 5 mm PADUL 13C  
PULPROG zg30  
TD 65536  
SOLVENT CDCl3  
NS 6  
DS 0  
SWH 8223.685 Hz  
FIDRES 0.125483 Hz  
AQ 3.9845889 sec  
RG 140.02  
DW 60.800 usec  
DE 6.50 usec  
TE 291.0 K  
D1 1.00000000 sec  
TD0 1

==== CHANNEL f1 =====  
NUC1 1H  
P1 9.90 usec  
PLW1 23.00000000 W  
SFO1 400.1924713 MHz

F2 - Processing parameters  
SI 65536  
SF 400.1900139 MHz  
WDW EM  
SSB 0  
LB 0.30 Hz  
GB 0  
PC 1.00

4h

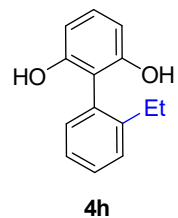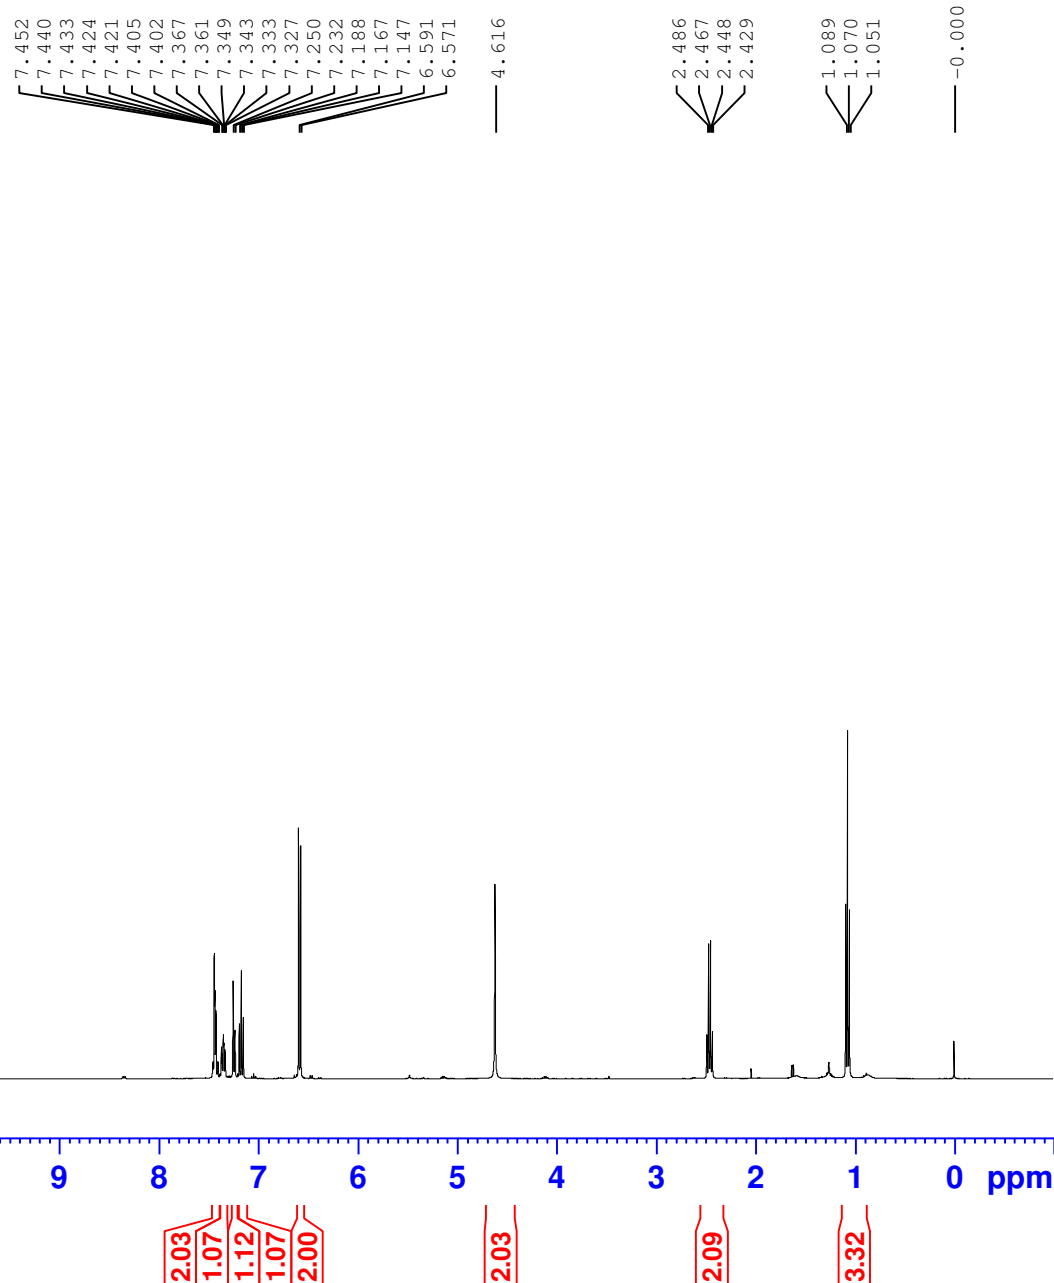

Current Data Parameters  
NAME 20240127-400  
EXPNO 6  
PROCNO 1

F2 - Acquisition Parameters  
Date\_ 20240126  
Time 21.47  
INSTRUM spect  
PROBHD 5 mm PADUL 13C  
PULPROG zg30  
TD 65536  
SOLVENT CDC13  
NS 6  
DS 2  
SWH 8223.685 Hz  
FIDRES 0.125483 Hz  
AQ 3.9845889 sec  
RG 75.43  
DW 60.800 usec  
DE 6.50 usec  
TE 289.3 K  
D1 1.00000000 sec  
TD0 1

==== CHANNEL f1 =====  
NUC1 1H  
P1 9.90 usec  
PLW1 23.00000000 W  
SFO1 400.1924713 MHz

F2 - Processing parameters  
SI 65536  
SF 400.1900174 MHz  
WDW EM  
SSB 0  
LB 0.30 Hz  
GB 0  
PC 1.00

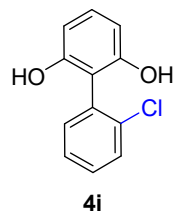

7.622  
7.612  
7.605  
7.598  
7.589  
7.580  
7.446  
7.437  
7.428  
7.423  
7.414  
7.405  
7.396  
7.387  
7.382  
7.373  
7.260  
7.208  
7.188  
7.168  
6.596  
6.575  
4.786

Current Data Parameters  
NAME 20240109-400m  
EXPNO 10  
PROCNO 1

F2 - Acquisition Parameters  
Date\_ 20240108  
Time 22.08  
INSTRUM spect  
PROBHD 5 mm PADUL 13C  
PULPROG zg30  
TD 65536  
SOLVENT CDCl3  
NS 6  
DS 2  
SWH 8223.685 Hz  
FIDRES 0.125483 Hz  
AQ 3.9845889 sec  
RG 113.67  
DW 60.800 usec  
DE 6.50 usec  
TE 291.9 K  
D1 1.00000000 sec  
TD0 1

===== CHANNEL f1 =====  
NUC1 1H  
P1 9.90 usec  
PLW1 23.00000000 W  
SFO1 400.1924713 MHz

F2 - Processing parameters  
SI 65536  
SF 400.1900138 MHz  
WDW EM  
SSB 0  
LB 0.30 Hz  
GB 0  
PC 1.00

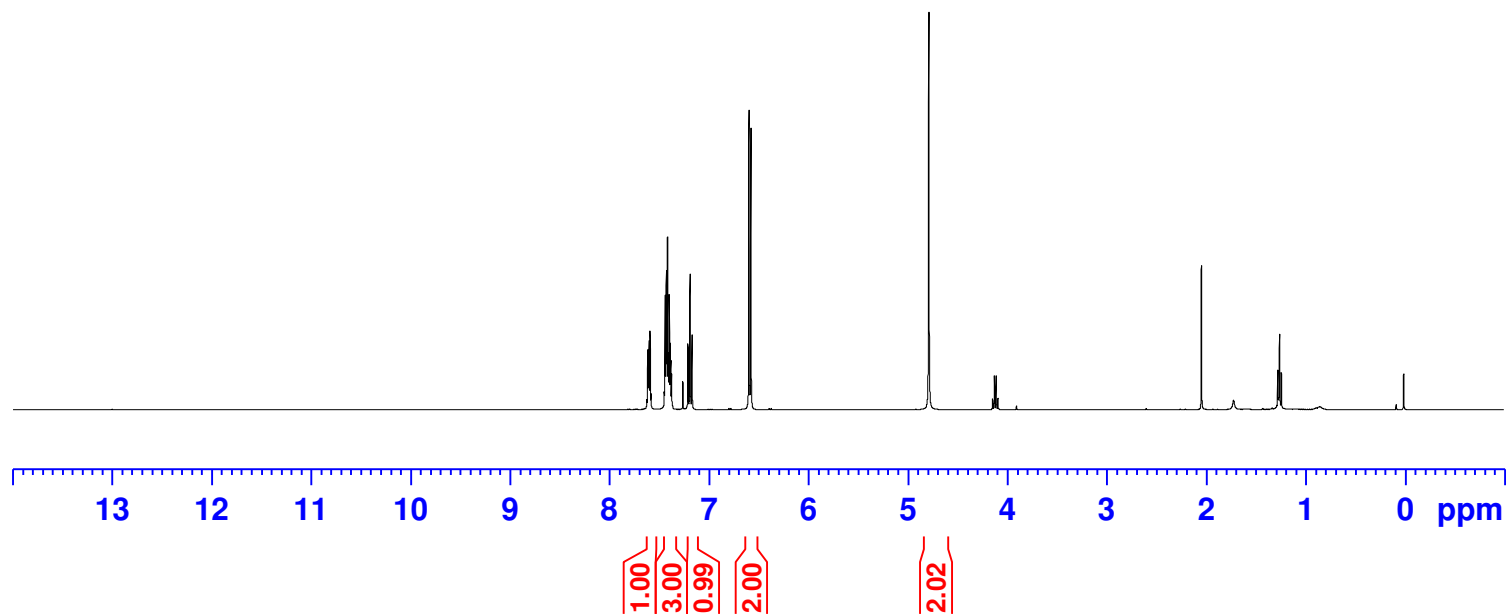

4j

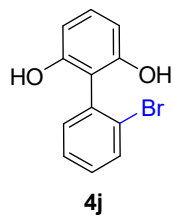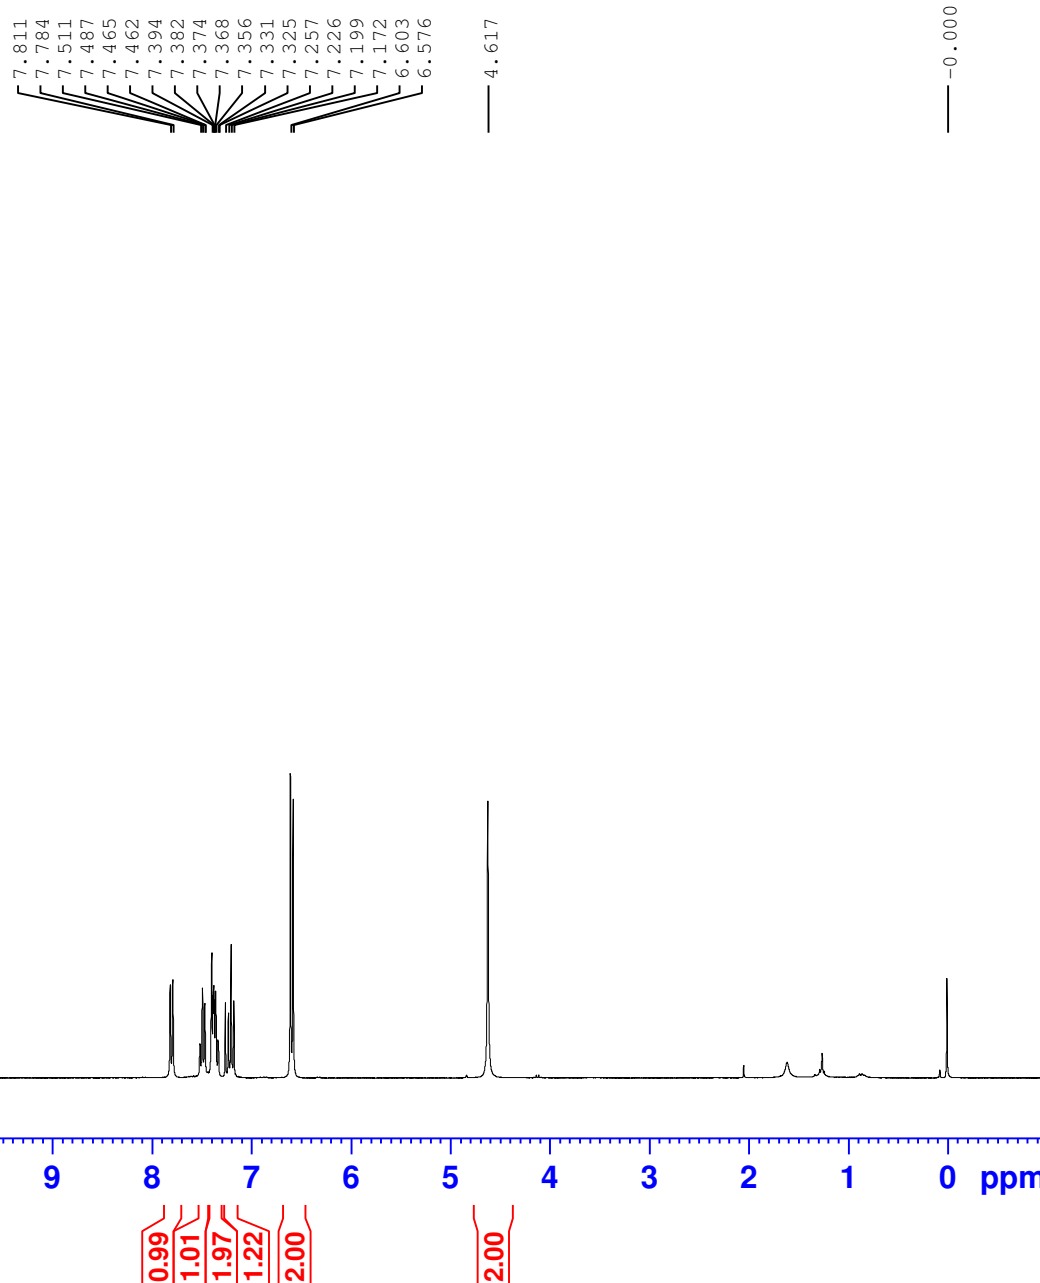

Current Data Parameters  
NAME 20240125-300  
EXPNO 951  
PROCNO 1

F2 - Acquisition Parameters  
Date\_ 20240125  
Time 11.25 h  
INSTRUM spect  
PROBHD Z104275\_0225 (  
PULPROG zg30  
TD 65536  
SOLVENT CDC13  
NS 16  
DS 2  
SWH 6009.615 Hz  
FIDRES 0.183399 Hz  
AQ 5.4525952 sec  
RG 203  
DW 83.200 usec  
DE 6.50 usec  
TE 292.5 K  
D1 1.00000000 sec  
TD0 1  
SFO1 300.1318533 MHz  
NUC1 1H  
P1 10.00 usec  
PLW1 14.00000000 W

F2 - Processing parameters  
SI 65536  
SF 300.1300083 MHz  
WDW EM  
SSB 0  
LB 0.30 Hz  
GB 0  
PC 1.00

4k

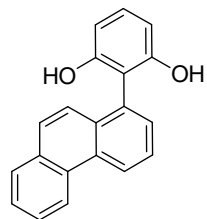

4k

8.807  
8.786  
8.772  
8.751  
7.932  
7.912  
7.876  
7.783  
7.780  
7.766  
7.762  
7.759  
7.753  
7.749  
7.745  
7.741  
7.735  
7.732  
7.729  
7.715  
7.711  
7.705  
7.703  
7.690  
7.685  
7.670  
7.653  
7.650  
7.598  
7.596  
7.581  
7.578  
7.575  
7.561  
7.558  
7.307  
7.286  
7.266  
7.257  
6.705  
6.685  
4.804

-0.000

Current Data Parameters  
NAME 20240105-400  
EXPNO 5  
PROCNO 1

F2 - Acquisition Parameters  
Date\_ 20240104  
Time 21.59  
INSTRUM spect  
PROBHD 5 mm PADUL 13C  
PULPROG zg30  
TD 65536  
SOLVENT CDCl3  
NS 6  
DS 0  
SWH 8223.685 Hz  
FIDRES 0.125483 Hz  
AQ 3.9845889 sec  
RG 154.68  
DW 60.800 usec  
DE 6.50 usec  
TE 291.0 K  
D1 1.00000000 sec  
TD0 1

==== CHANNEL f1 =====  
NUC1 1H  
P1 9.90 usec  
PLW1 23.00000000 W  
SFO1 400.1924713 MHz

F2 - Processing parameters  
SI 65536  
SF 400.1900153 MHz  
WDW EM  
SSB 0  
LB 0.30 Hz  
GB 0  
PC 1.00

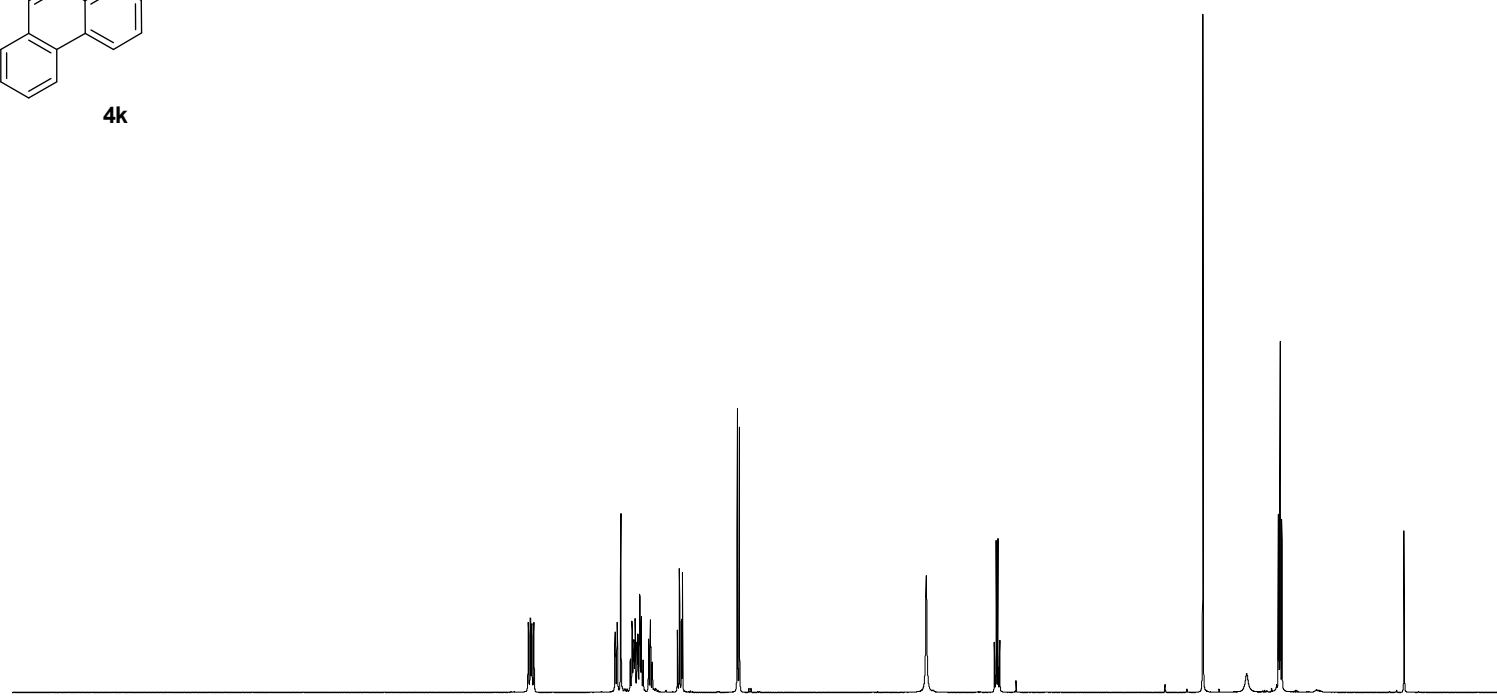

13 12 11 10 9 8 7 6 5 4 3 2 1 0 ppm

2.05  
2.04  
4.07  
1.03  
1.00  
2.00  
1.97

3a

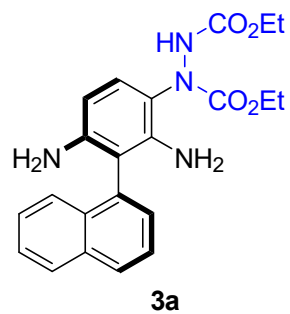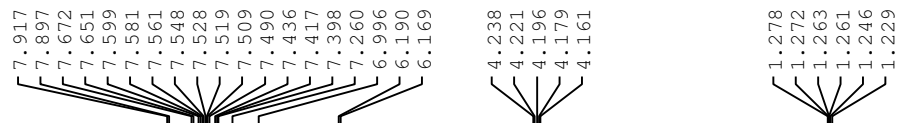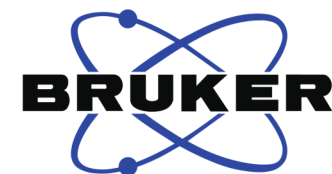

Current Data Parameters  
 NAME 20231013-400M  
 EXPNO 18  
 PROCNO 1

F2 - Acquisition Parameters  
 Date\_ 20231012  
 Time 23.13  
 INSTRUM spect  
 PROBHD 5 mm PADUL 13C  
 PULPROG zg30  
 TD 65536  
 SOLVENT CDC13  
 NS 5  
 DS 2  
 SWH 8223.685 Hz  
 FIDRES 0.125483 Hz  
 AQ 3.9845889 sec  
 RG 75.43  
 DW 60.800 usec  
 DE 6.50 usec  
 TE 290.8 K  
 D1 1.00000000 sec  
 TD0 1

==== CHANNEL f1 =====  
 NUC1 1H  
 P1 9.90 usec  
 PLW1 23.00000000 W  
 SFO1 400.1924713 MHz

F2 - Processing parameters  
 SI 65536  
 SF 400.1900138 MHz  
 WDW EM  
 SSB 0  
 LB 0.30 Hz  
 GB 0  
 PC 1.00

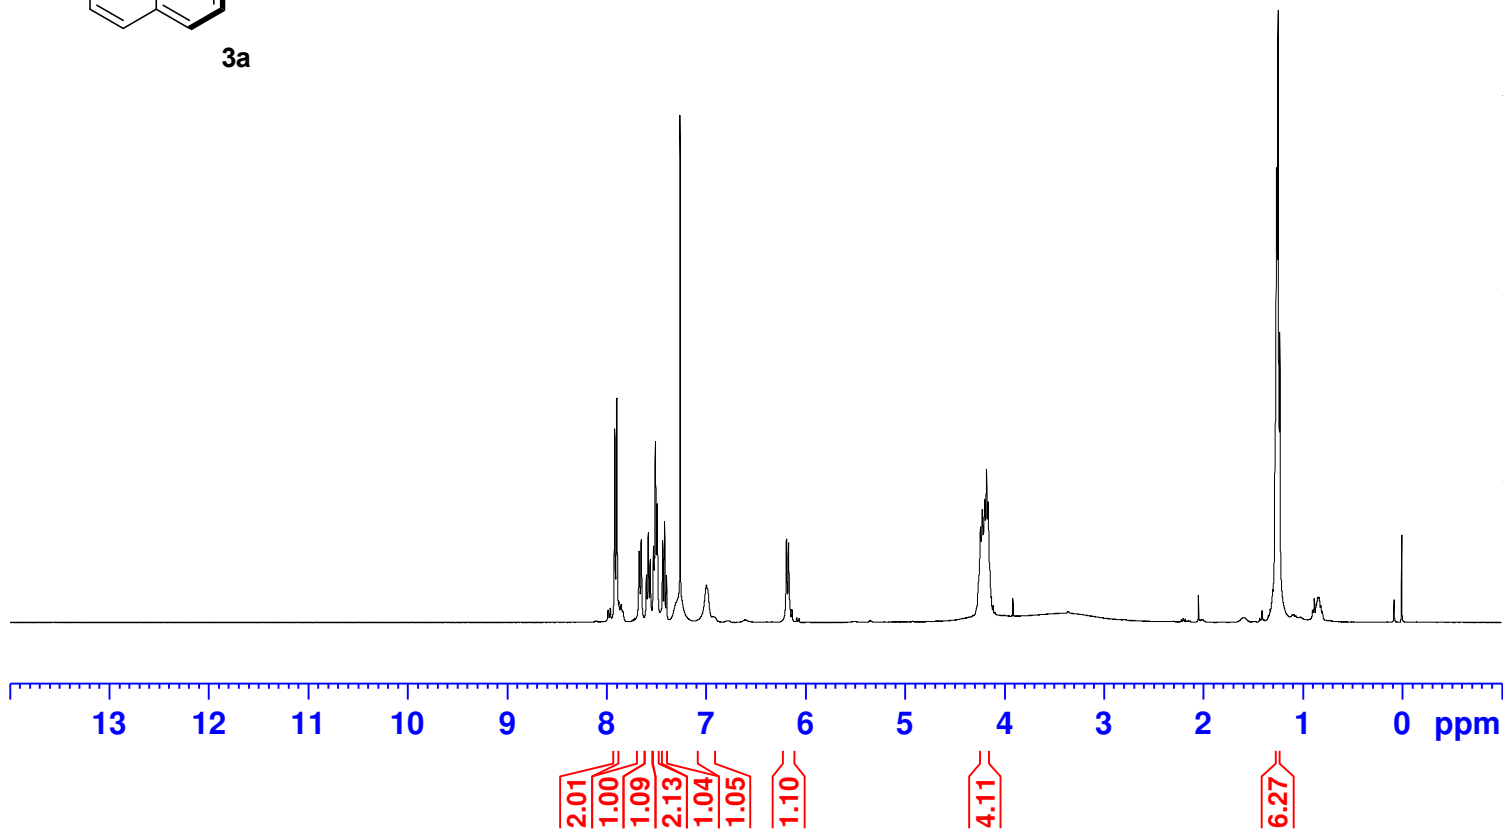



3a

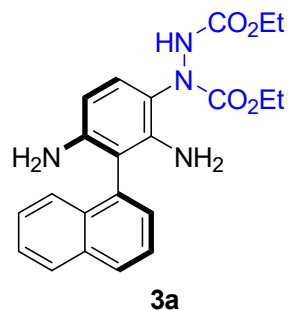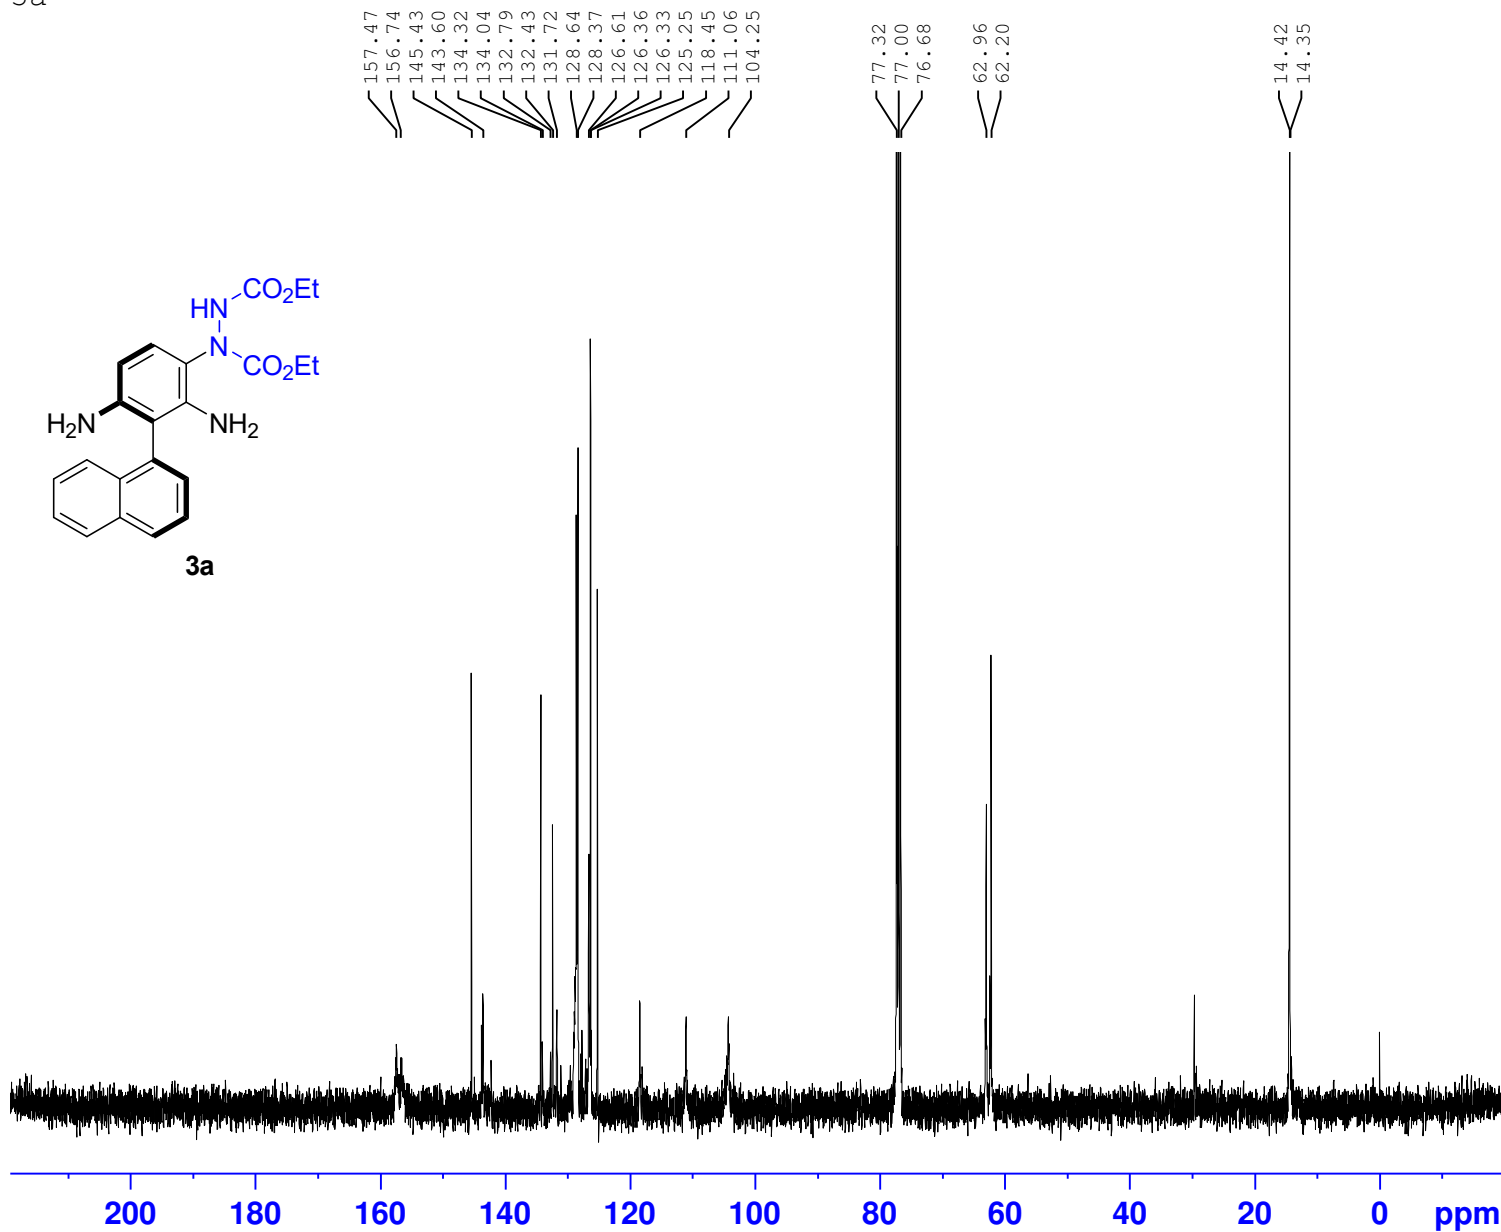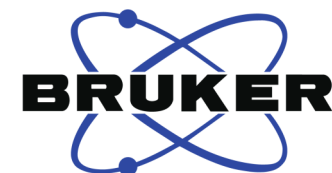

Current Data Parameters  
 NAME 20231024-400  
 EXPNO 23  
 PROCNO 1

F2 - Acquisition Parameters  
 Date\_ 20231024  
 Time 3.41  
 INSTRUM spect  
 PROBHD 5 mm PADUL 13C  
 PULPROG zgpg30  
 TD 65536  
 SOLVENT CDC13  
 NS 1024  
 DS 4  
 SWH 24038.461 Hz  
 FIDRES 0.366798 Hz  
 AQ 1.3631488 sec  
 RG 37.77  
 DW 20.800 usec  
 DE 6.50 usec  
 TE 292.4 K  
 D1 2.00000000 sec  
 D11 0.03000000 sec  
 TD0 1

==== CHANNEL f1 =====  
 NUC1 13C  
 P1 9.80 usec  
 PLW1 47.40000153 W  
 SFO1 100.6379178 MHz

==== CHANNEL f2 =====  
 CPDPRG[2] waltz16  
 NUC2 1H  
 PCPD2 90.00 usec  
 PLW2 23.00000000 W  
 PLW12 0.30712000 W  
 PLW13 0.24877000 W  
 SFO2 400.1916008 MHz

F2 - Processing parameters  
 SI 32768  
 SF 100.6278662 MHz  
 WDW EM  
 SSB 0  
 LB 1.00 Hz  
 GB 0  
 PC 1.40

3b

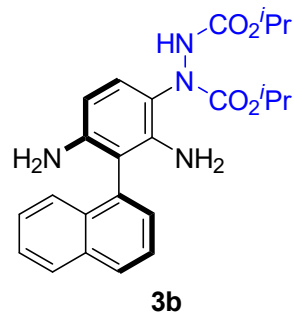

7.915  
7.895  
7.660  
7.597  
7.579  
7.560  
7.523  
7.506  
7.488  
7.425  
7.407  
7.388  
7.260  
7.056  
6.995  
6.971  
6.184  
6.164  
4.965  
4.959  
4.950

1.262  
1.247



Current Data Parameters  
NAME 20231109-400M  
EXPNO 26  
PROCNO 1

F2 - Acquisition Parameters  
Date\_ 20231108  
Time 23.45  
INSTRUM spect  
PROBHD 5 mm PADUL 13C  
PULPROG zg30  
TD 65536  
SOLVENT CDC13  
NS 6  
DS 0  
SWH 8223.685 Hz  
FIDRES 0.125483 Hz  
AQ 3.9845889 sec  
RG 53.3  
DW 60.800 usec  
DE 6.50 usec  
TE 294.2 K  
D1 1.00000000 sec  
TD0 1

==== CHANNEL f1 =====  
NUC1 1H  
P1 9.90 usec  
PLW1 23.00000000 W  
SFO1 400.1924713 MHz

F2 - Processing parameters  
SI 65536  
SF 400.1900139 MHz  
WDW EM  
SSB 0  
LB 0.30 Hz  
GB 0  
PC 1.00

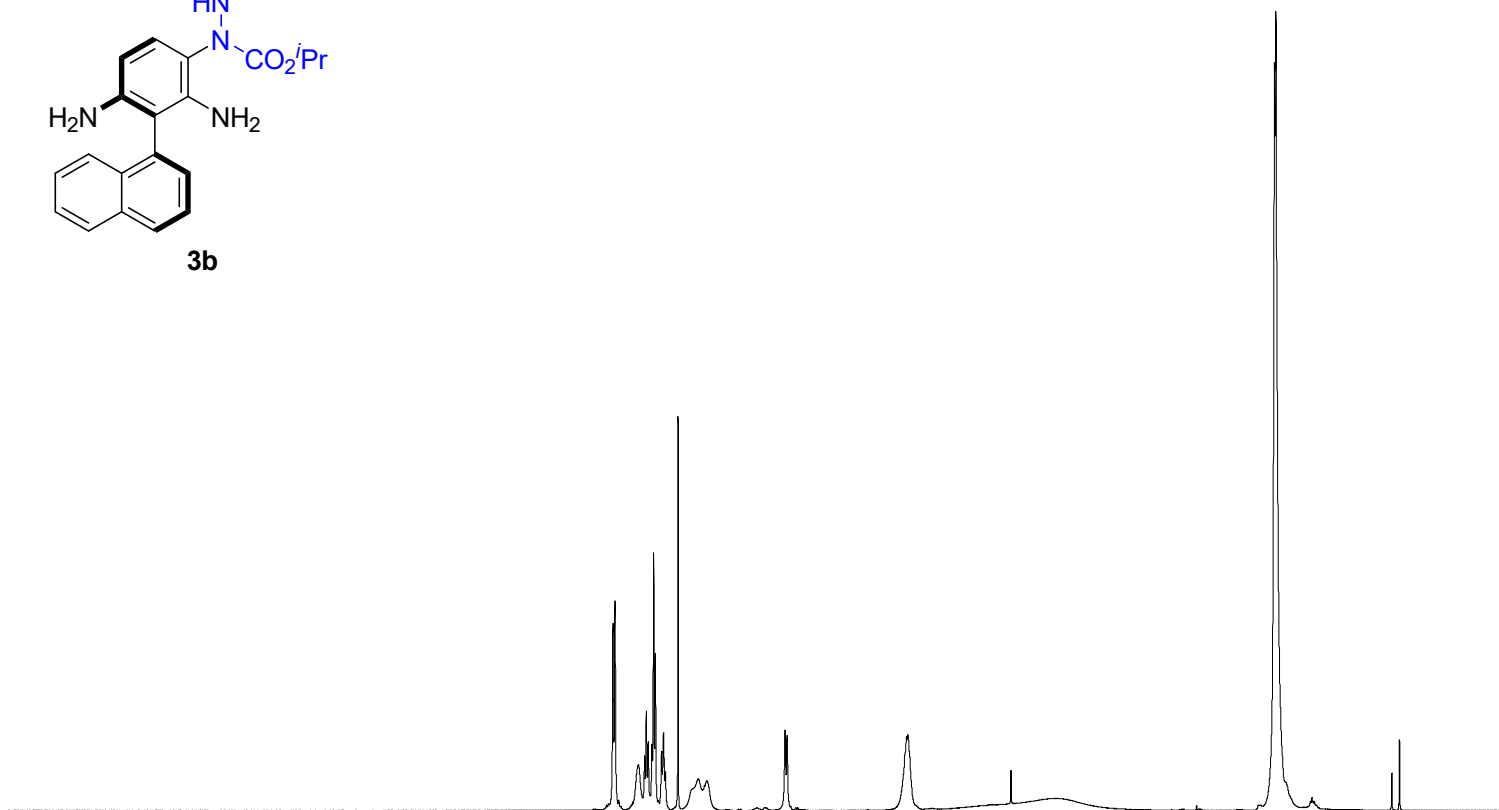

13 12 11 10 9 8 7 6 5 4 3 2 1 0 ppm

2.09  
0.97  
1.10  
2.04  
1.01  
2.09  
1.00  
2.15

12.16

3b

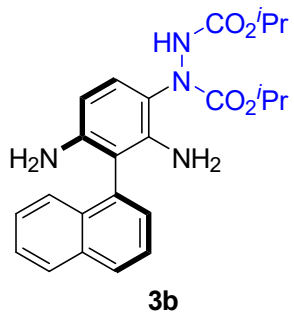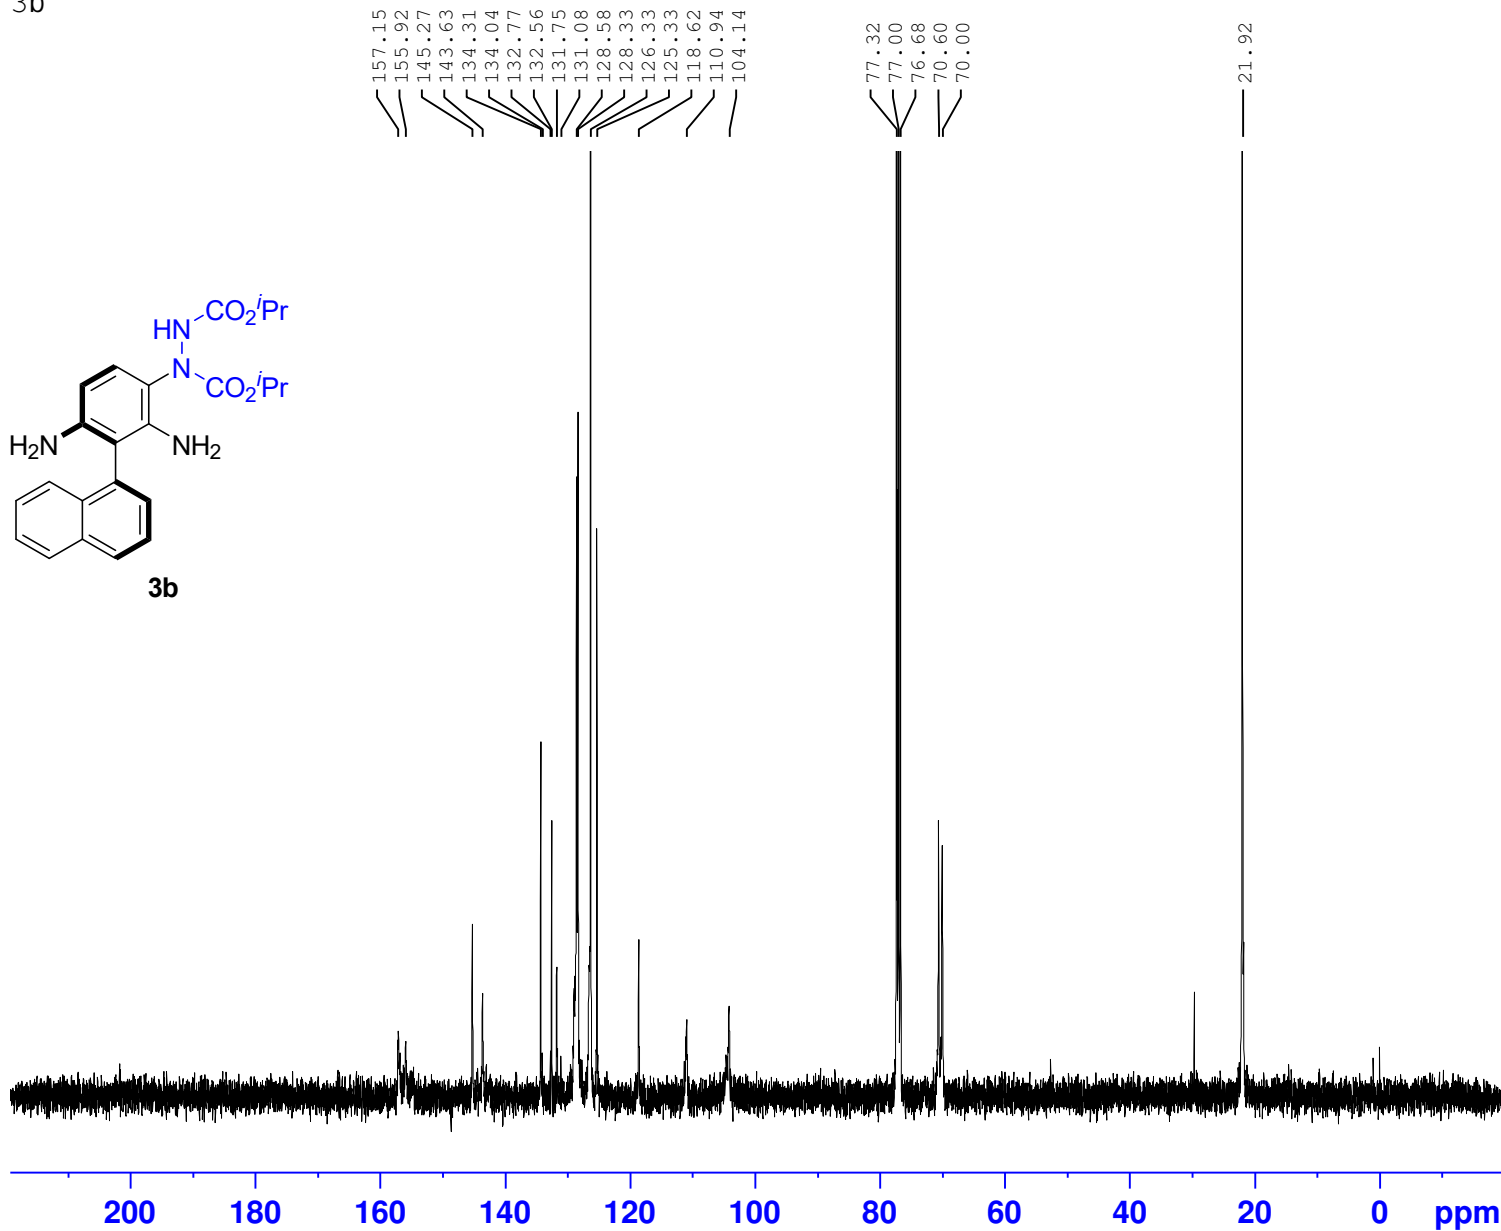

Current Data Parameters  
NAME 20231112-400  
EXPNO 17  
PROCNO 1

F2 - Acquisition Parameters  
Date\_ 20231112  
Time 0.55  
INSTRUM spect  
PROBHD 5 mm PADUL 13C  
PULPROG zgpg30  
TD 65536  
SOLVENT CDC13  
NS 1024  
DS 4  
SWH 24038.461 Hz  
FIDRES 0.366798 Hz  
AQ 1.3631488 sec  
RG 37.77  
DW 20.800 usec  
DE 6.50 usec  
TE 294.2 K  
D1 2.00000000 sec  
D11 0.03000000 sec  
TD0 1

=====  
CHANNEL f1  
NUC1 13C  
P1 9.80 usec  
PLW1 47.4000153 W  
SFO1 100.6379178 MHz

=====  
CHANNEL f2  
CPDPRG[2] waltz16  
NUC2 1H  
PCPD2 90.00 usec  
PLW2 23.00000000 W  
PLW12 0.30712000 W  
PLW13 0.24877000 W  
SFO2 400.1916008 MHz

F2 - Processing parameters  
SI 32768  
SF 100.6278669 MHz  
WDW EM  
SSB 0  
LB 1.00 Hz  
GB 0  
PC 1.40

3c

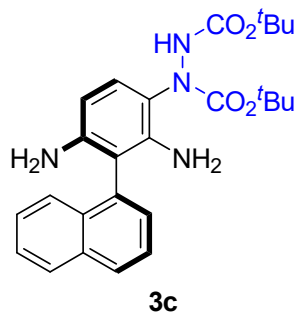

7.915  
7.895  
7.691  
7.601  
7.583  
7.564  
7.545  
7.514  
7.507  
7.488  
7.406  
7.260  
7.018  
6.996  
6.875  
6.188  
6.168

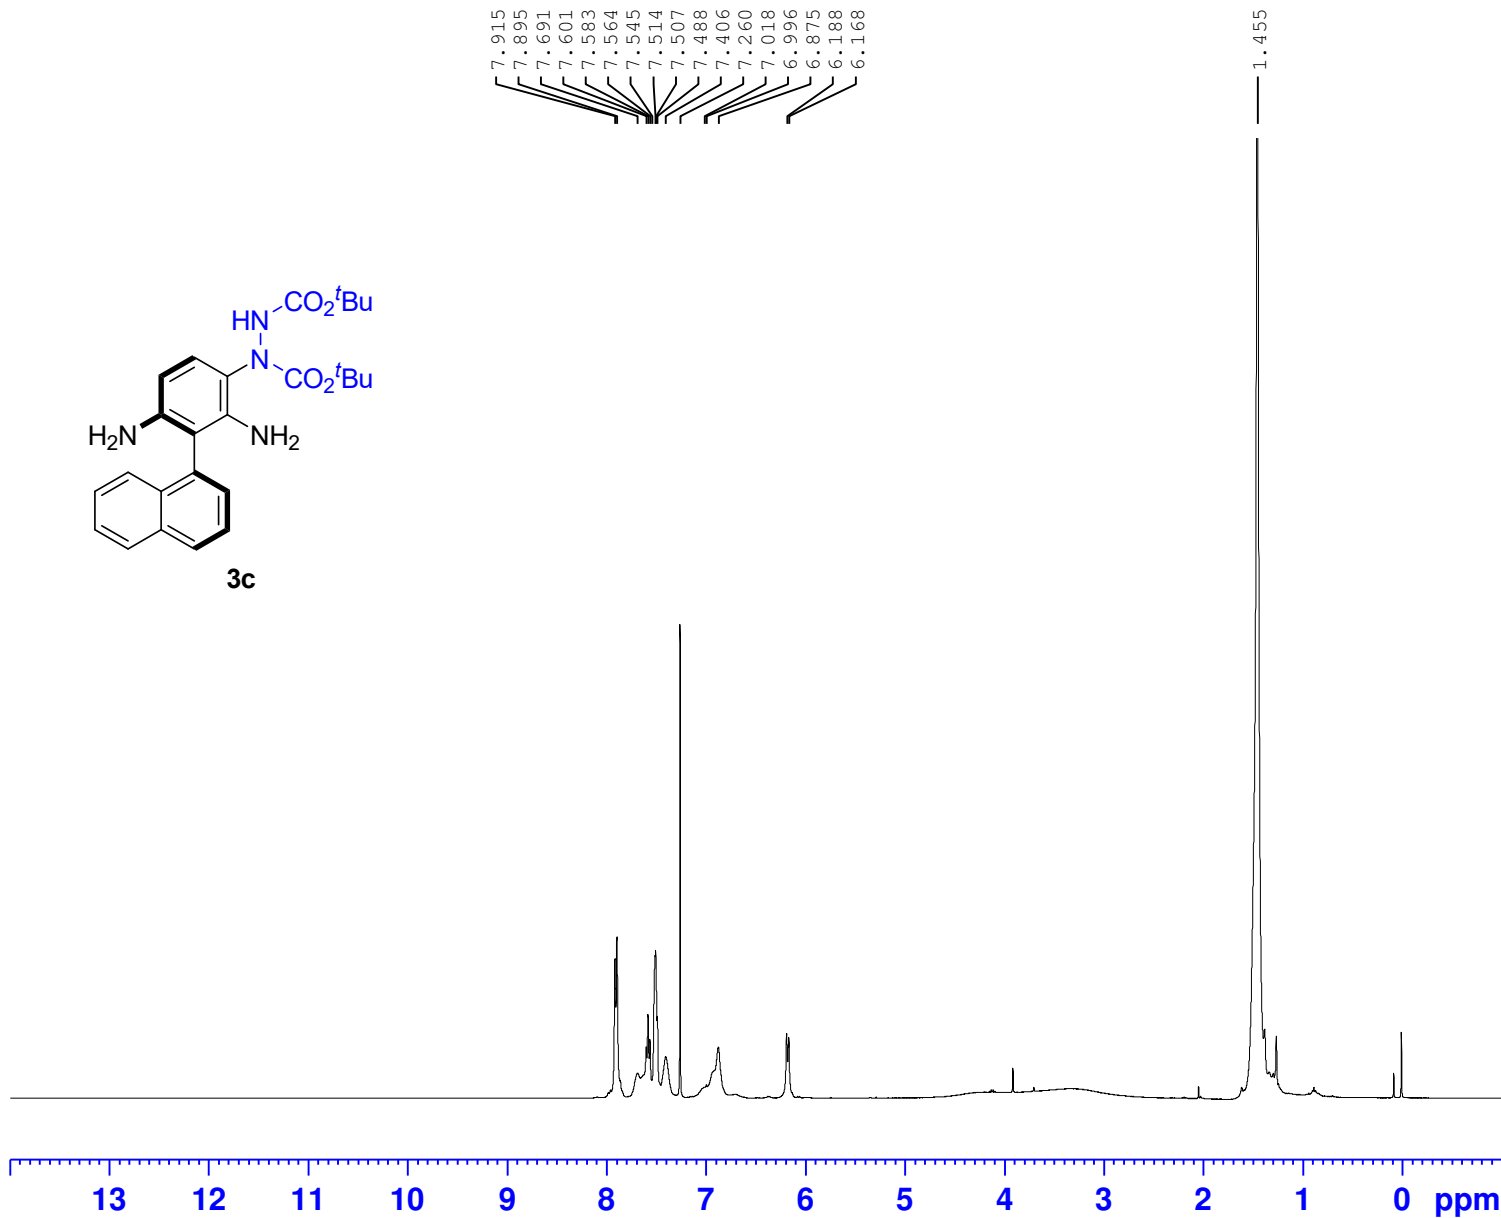

Current Data Parameters  
NAME 20231110-400  
EXPNO 24  
PROCNO 1

F2 - Acquisition Parameters  
Date\_ 20231110  
Time 0.08  
INSTRUM spect  
PROBHD 5 mm PADUL 13C  
PULPROG zg30  
TD 65536  
SOLVENT CDC13  
NS 8  
DS 2  
SWH 8223.685 Hz  
FIDRES 0.125483 Hz  
AQ 3.9845889 sec  
RG 53.3  
DW 60.800 usec  
DE 6.50 usec  
TE 294.3 K  
D1 1.00000000 sec  
TD0 1

==== CHANNEL f1 =====  
NUC1 1H  
P1 9.90 usec  
PLW1 23.00000000 W  
SFO1 400.1924713 MHz

F2 - Processing parameters  
SI 65536  
SF 400.1900139 MHz  
WDW EM  
SSB 0  
LB 0.30 Hz  
GB 0  
PC 1.00

2.23  
2.18  
2.26  
1.12  
2.16  
1.00  
18.01

3c

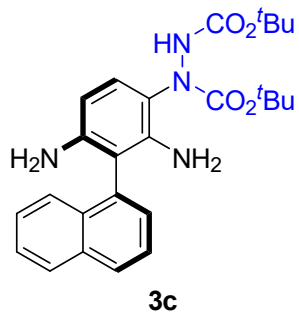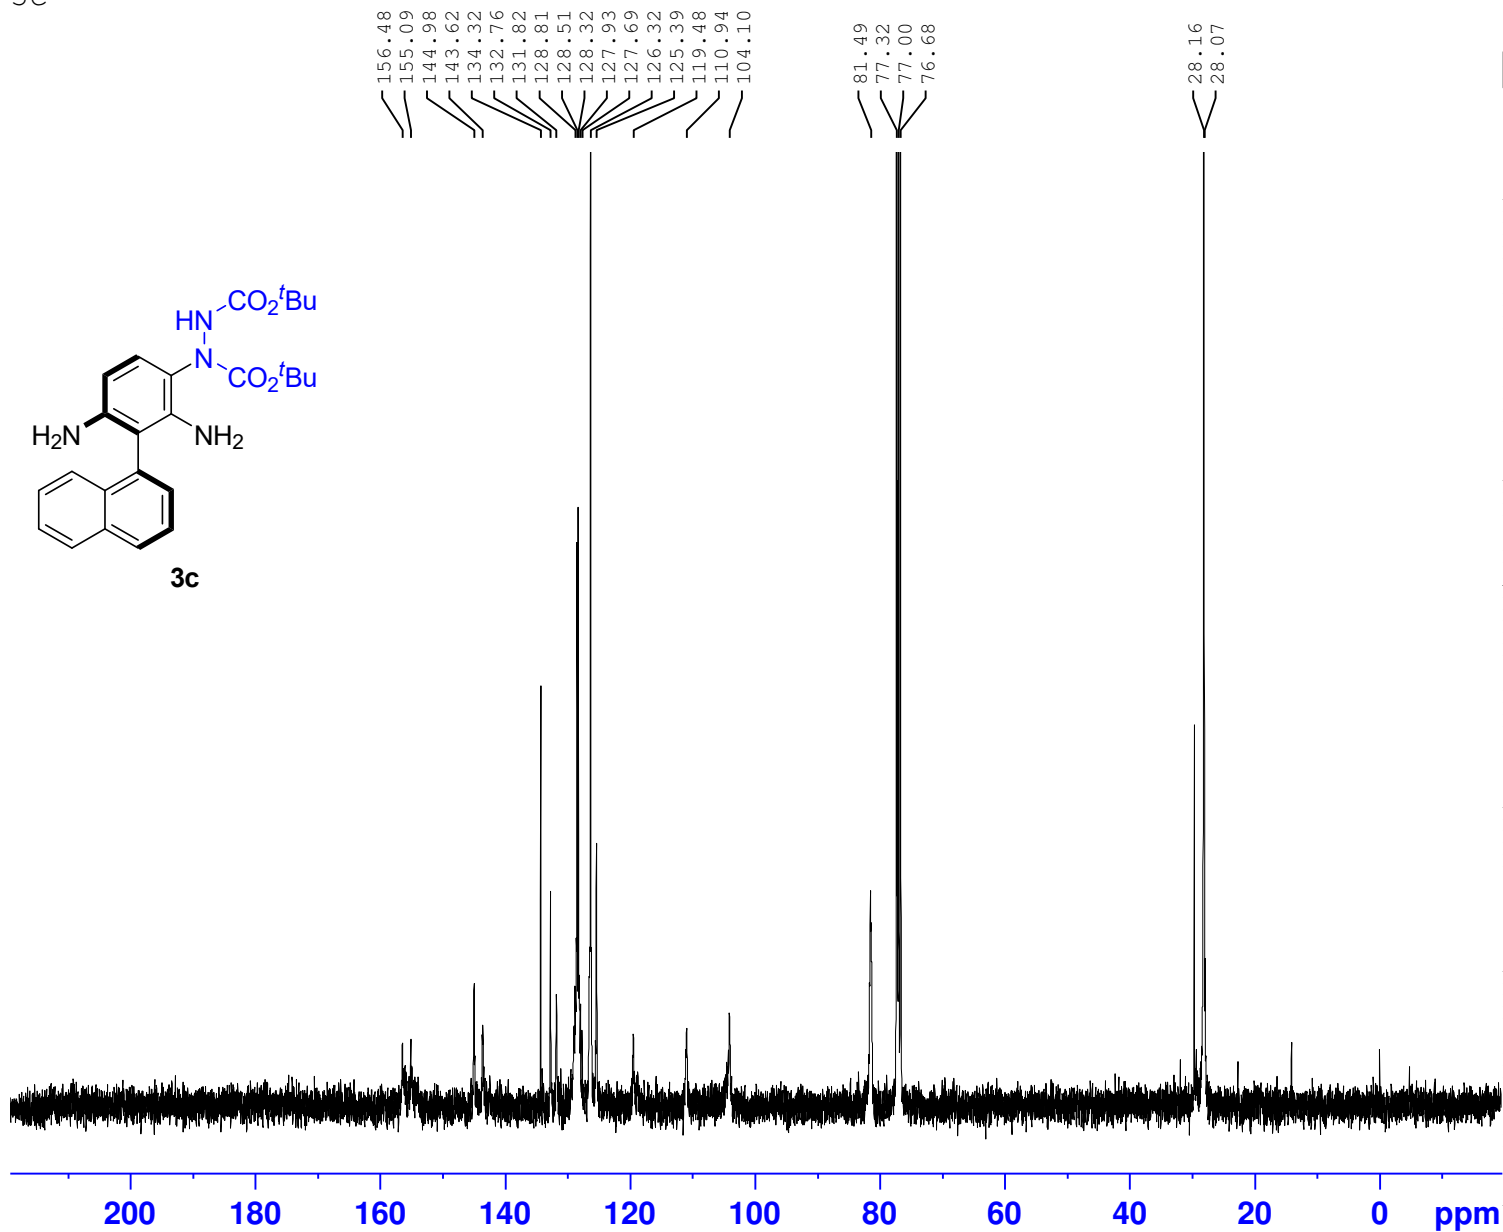

Current Data Parameters  
 NAME 20231112-400  
 EXPNO 24  
 PROCNO 1

F2 - Acquisition Parameters  
 Date\_ 20231112  
 Time 5.10  
 INSTRUM spect  
 PROBHD 5 mm PADUL 13C  
 PULPROG zgpg30  
 TD 65536  
 SOLVENT CDC13  
 NS 1024  
 DS 4  
 SWH 24038.461 Hz  
 FIDRES 0.366798 Hz  
 AQ 1.3631488 sec  
 RG 37.77  
 DW 20.800 usec  
 DE 6.50 usec  
 TE 294.5 K  
 D1 2.00000000 sec  
 D11 0.03000000 sec  
 TD0 1

===== CHANNEL f1 =====  
 NUC1 13C  
 P1 9.80 usec  
 PLW1 47.40000153 W  
 SFO1 100.6379178 MHz

===== CHANNEL f2 =====  
 CPDPRG[2] waltz16  
 NUC2 1H  
 PCPD2 90.00 usec  
 PLW2 23.00000000 W  
 PLW12 0.30712000 W  
 PLW13 0.24877000 W  
 SFO2 400.1916008 MHz

F2 - Processing parameters  
 SI 32768  
 SF 100.6278662 MHz  
 WDW EM  
 SSB 0  
 LB 1.00 Hz  
 GB 0  
 PC 1.40

3d

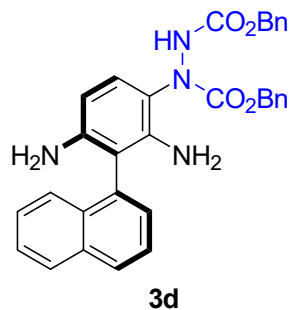

7.936  
7.915  
7.671  
7.603  
7.585  
7.566  
7.539  
7.521  
7.500  
7.480  
7.425  
7.415  
7.312  
7.260  
7.025  
7.007  
6.996  
6.175  
6.154  
5.250  
5.210  
5.130  
5.085

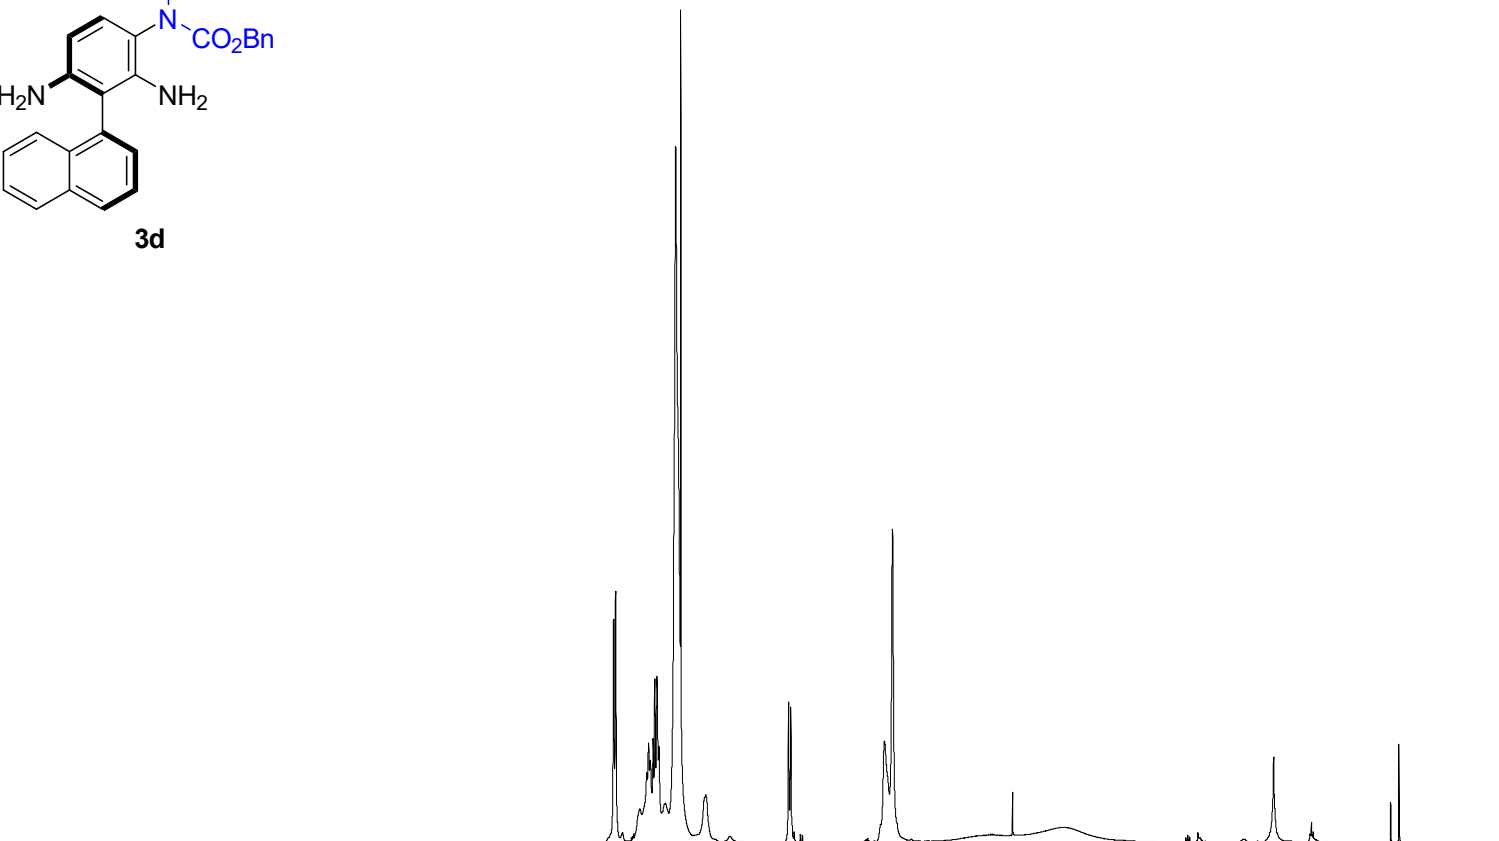

Current Data Parameters  
NAME 20231111-400  
EXPNO 14  
PROCNO 1

F2 - Acquisition Parameters  
Date\_ 20231111  
Time 0.40  
INSTRUM spect  
PROBHD 5 mm PADUL 13C  
PULPROG zg30  
TD 65536  
SOLVENT CDCl3  
NS 8  
DS 2  
SWH 8223.685 Hz  
FIDRES 0.125483 Hz  
AQ 3.9845889 sec  
RG 50.16  
DW 60.800 usec  
DE 6.50 usec  
TE 292.6 K  
D1 1.00000000 sec  
TD0 1

==== CHANNEL f1 =====  
NUC1 1H  
P1 9.90 usec  
PLW1 23.00000000 W  
SFO1 400.1924713 MHz

F2 - Processing parameters  
SI 65536  
SF 400.1900138 MHz  
WDW EM  
SSB 0  
LB 0.30 Hz  
GB 0  
PC 1.00

13 12 11 10 9 8 7 6 5 4 3 2 1 0 ppm

2.00  
5.08  
11.12  
0.94  
0.98  
4.28

3d

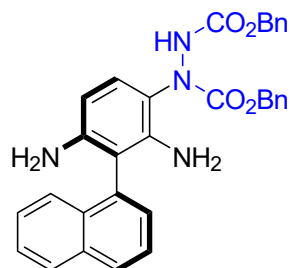

3d

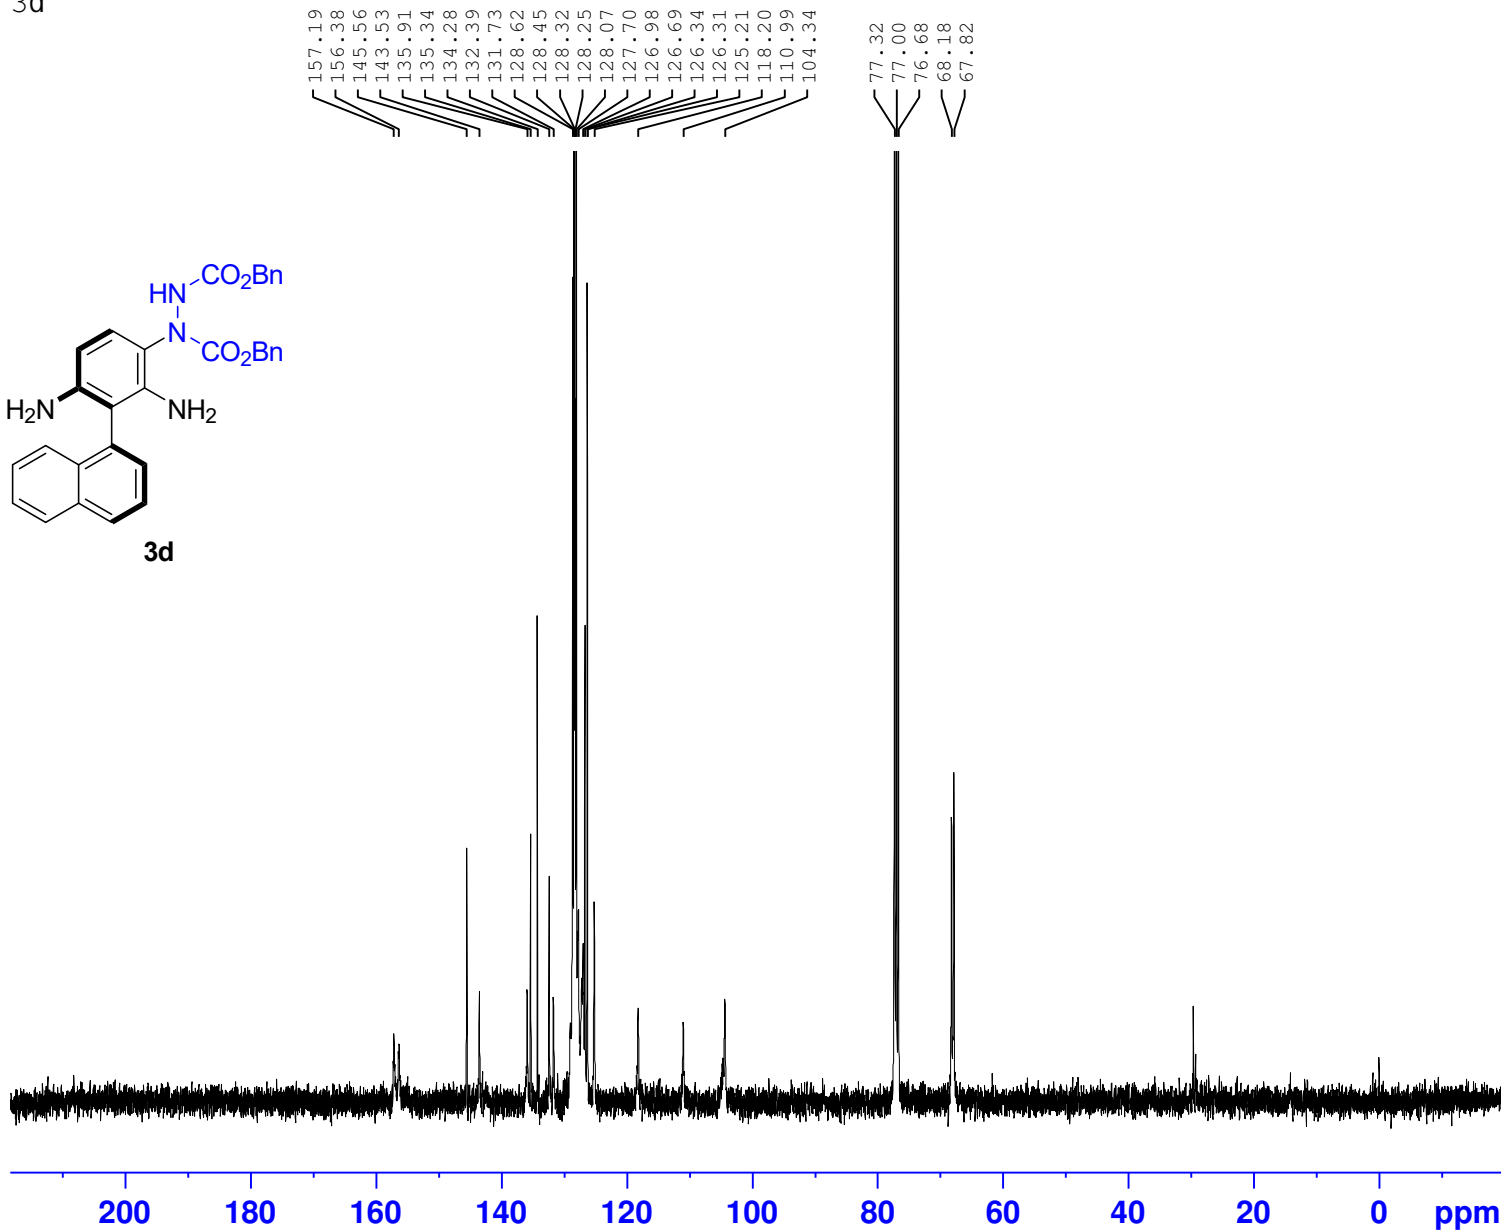

Current Data Parameters  
NAME 20231112-400  
EXPNO 22  
PROCNO 1

F2 - Acquisition Parameters  
Date\_ 20231112  
Time 3.05  
INSTRUM spect  
PROBHD 5 mm PADUL 13C  
PULPROG zgpg30  
TD 65536  
SOLVENT CDC13  
NS 1024  
DS 4  
SWH 24038.461 Hz  
FIDRES 0.366798 Hz  
AQ 1.3631488 sec  
RG 44.2  
DW 20.800 usec  
DE 6.50 usec  
TE 294.4 K  
D1 2.00000000 sec  
D11 0.03000000 sec  
TD0 1

==== CHANNEL f1 =====  
NUC1 13C  
P1 9.80 usec  
PLW1 47.40000153 W  
SFO1 100.6379178 MHz

==== CHANNEL f2 =====  
CPDPRG[2] waltz16  
NUC2 1H  
PCPD2 90.00 usec  
PLW2 23.00000000 W  
PLW12 0.30712000 W  
PLW13 0.24877000 W  
SFO2 400.1916008 MHz

F2 - Processing parameters  
SI 32768  
SF 100.6278713 MHz  
WDW EM  
SSB 0  
LB 1.00 Hz  
GB 0  
PC 1.40

3e

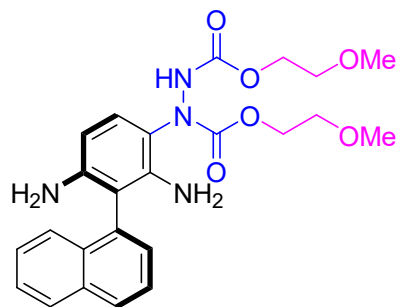

3e

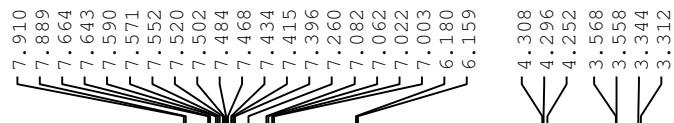

Current Data Parameters  
NAME 20231115-400M  
EXPNO 22  
PROCNO 1

F2 - Acquisition Parameters  
Date\_ 20231115  
Time 1.24  
INSTRUM spect  
PROBHD 5 mm PADUL 13C  
PULPROG zg30  
TD 65536  
SOLVENT CDC13  
NS 14  
DS 2  
SWH 8223.685 Hz  
FIDRES 0.125483 Hz  
AQ 3.9845889 sec  
RG 61.19  
DW 60.800 usec  
DE 6.50 usec  
TE 295.7 K  
D1 1.00000000 sec  
TD0 1

==== CHANNEL f1 =====  
NUC1 1H  
P1 9.90 usec  
PLW1 23.00000000 W  
SFO1 400.1924713 MHz

F2 - Processing parameters  
SI 65536  
SF 400.1900139 MHz  
WDW EM  
SSB 0  
LB 0.30 Hz  
GB 0  
PC 1.00

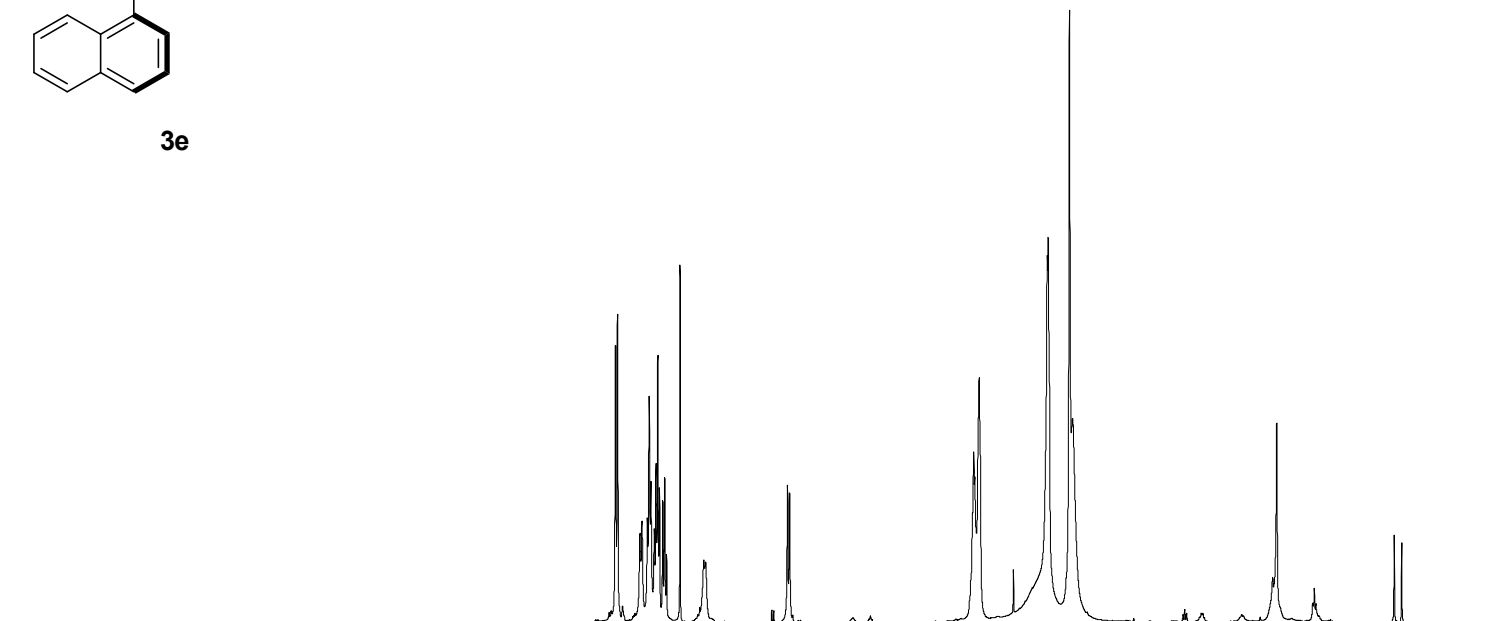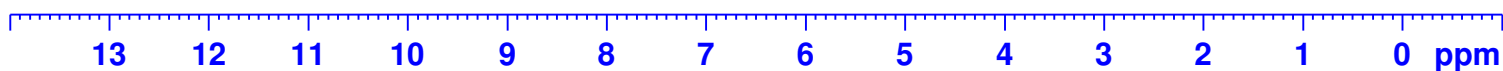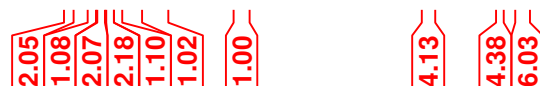



3e

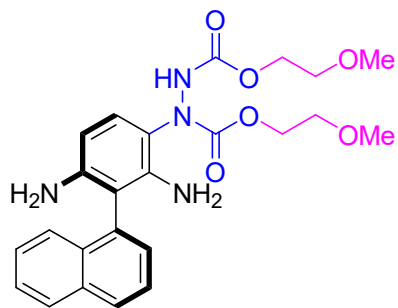

3e

156.93  
156.28  
145.43  
143.44  
134.32  
132.45  
131.73  
129.20  
128.91  
128.62  
128.36  
126.64  
126.35  
126.32  
125.26  
118.39  
111.10  
104.48

77.32  
77.00  
76.68  
70.37  
65.92  
64.96  
58.92  
58.81

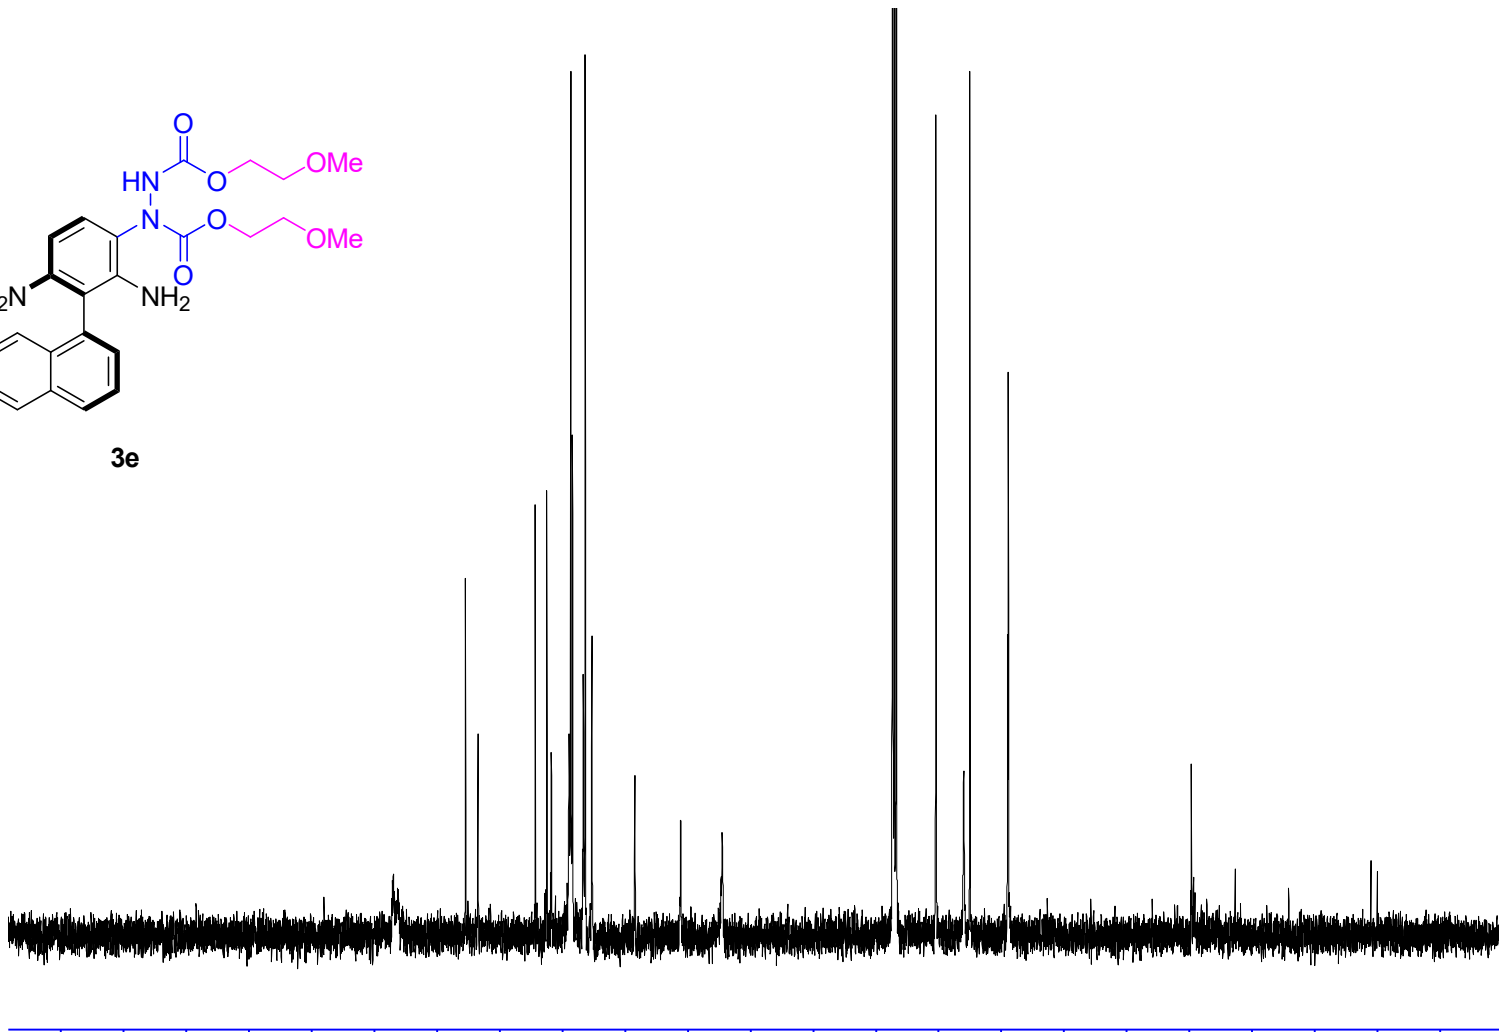

200 180 160 140 120 100 80 60 40 20 0 ppm

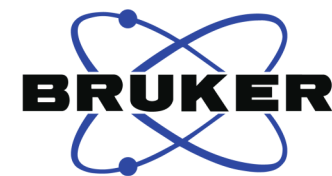

Current Data Parameters  
NAME 20231115-400M  
EXPNO 23  
PROCNO 1

F2 - Acquisition Parameters  
Date\_ 20231115  
Time 2.14  
INSTRUM spect  
PROBHD 5 mm PADUL 13C  
PULPROG zgpg30  
TD 65536  
SOLVENT CDC13  
NS 850  
DS 4  
SWH 24038.461 Hz  
FIDRES 0.366798 Hz  
AQ 1.3631488 sec  
RG 37.77  
DW 20.800 usec  
DE 6.50 usec  
TE 296.6 K  
D1 2.00000000 sec  
D11 0.03000000 sec  
TD0 1

===== CHANNEL f1 =====  
NUC1 13C  
P1 9.80 usec  
PLW1 47.40000153 W  
SFO1 100.6379178 MHz

===== CHANNEL f2 =====  
CPDPRG[2] waltz16  
NUC2 1H  
PCPD2 90.00 usec  
PLW2 23.00000000 W  
PLW12 0.30712000 W  
PLW13 0.24877000 W  
SFO2 400.1916008 MHz

F2 - Processing parameters  
SI 32768  
SF 100.6278660 MHz  
WDW EM  
SSB 0  
LB 1.00 Hz  
GB 0  
PC 1.40

3f

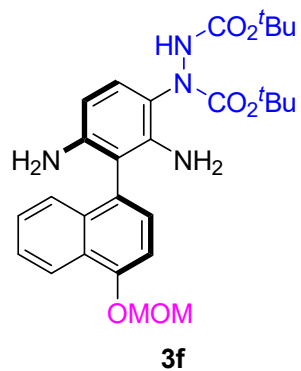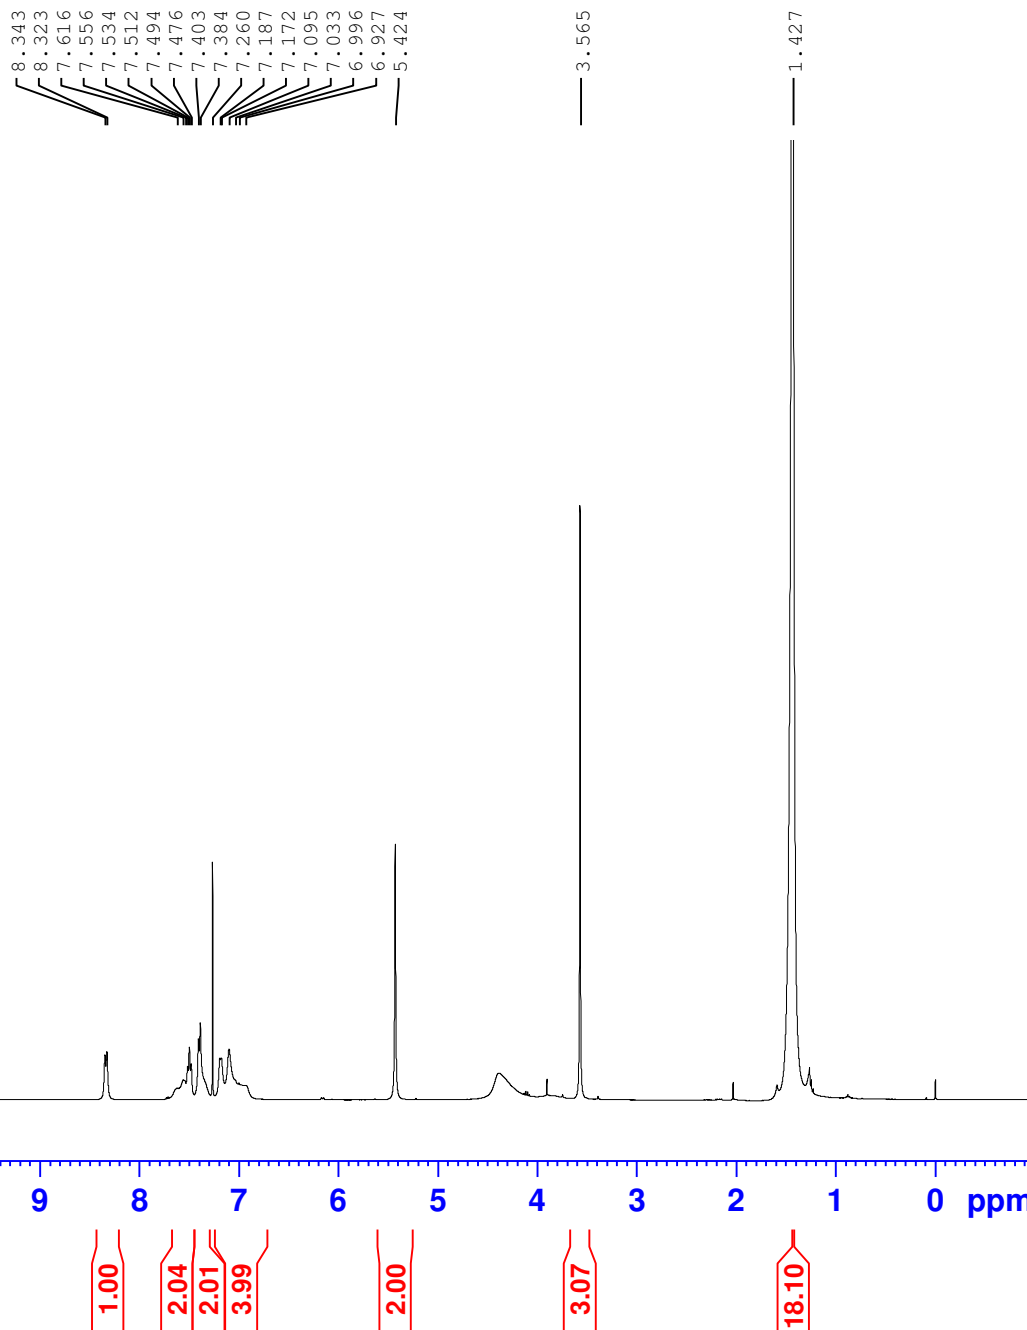

Current Data Parameters  
NAME 20231201-400M  
EXPNO 28  
PROCNO 1

F2 - Acquisition Parameters  
Date\_ 20231201  
Time 0.39  
INSTRUM spect  
PROBHD 5 mm PADUL 13C  
PULPROG zg30  
TD 65536  
SOLVENT CDC13  
NS 8  
DS 2  
SWH 8223.685 Hz  
FIDRES 0.125483 Hz  
AQ 3.9845889 sec  
RG 18.94  
DW 60.800 usec  
DE 6.50 usec  
TE 295.1 K  
D1 1.00000000 sec  
TD0 1

==== CHANNEL f1 =====  
NUC1 1H  
P1 9.90 usec  
PLW1 23.00000000 W  
SFO1 400.1924713 MHz

F2 - Processing parameters  
SI 65536  
SF 400.1900135 MHz  
WDW EM  
SSB 0  
LB 0.30 Hz  
GB 0  
PC 1.00

3f

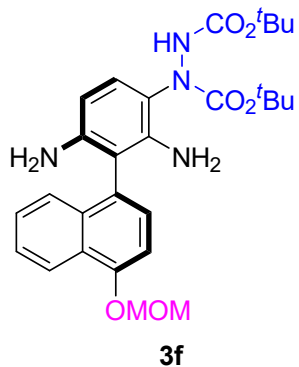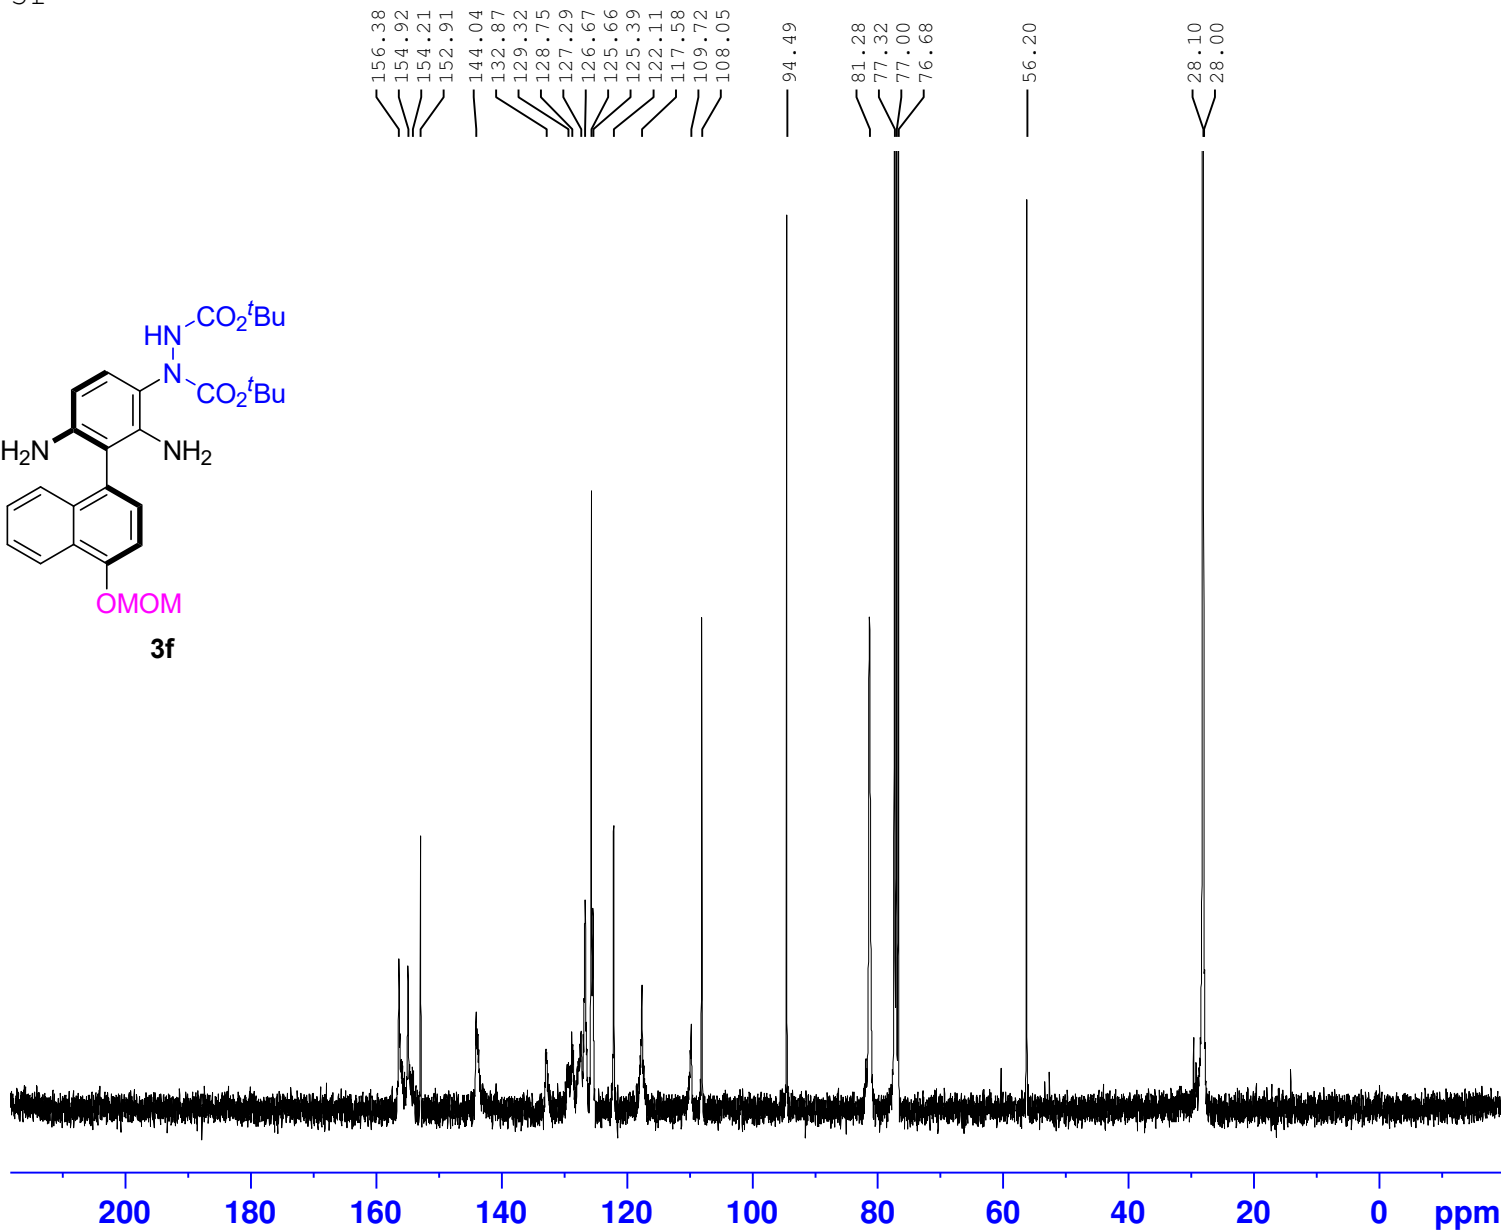

156.38  
154.92  
154.21  
152.91  
144.04  
132.87  
129.32  
128.75  
127.29  
126.67  
125.66  
125.39  
122.11  
117.58  
109.72  
108.05  
94.49  
81.28  
77.32  
77.00  
76.68  
56.20  
28.10  
28.00

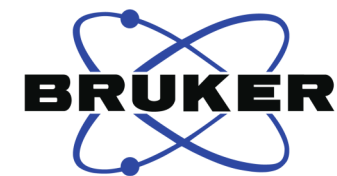

Current Data Parameters  
 NAME 20231201-400M  
 EXPNO 29  
 PROCNO 1

F2 - Acquisition Parameters  
 Date\_ 20231201  
 Time 1.39  
 INSTRUM spect  
 PROBHD 5 mm PADUL 13C  
 PULPROG zgpg30  
 TD 65536  
 SOLVENT CDC13  
 NS 1024  
 DS 4  
 SWH 24038.461 Hz  
 FIDRES 0.366798 Hz  
 AQ 1.3631488 sec  
 RG 90.23  
 DW 20.800 usec  
 DE 6.50 usec  
 TE 295.8 K  
 D1 2.00000000 sec  
 D11 0.03000000 sec  
 TD0 1

===== CHANNEL f1 =====  
 NUC1 13C  
 P1 9.80 usec  
 PLW1 47.40000153 W  
 SFO1 100.6379178 MHz

===== CHANNEL f2 =====  
 CPDPRG[2] waltz16  
 NUC2 1H  
 PCPD2 90.00 usec  
 PLW2 23.00000000 W  
 PLW12 0.30712000 W  
 PLW13 0.24877000 W  
 SFO2 400.1916008 MHz

F2 - Processing parameters  
 SI 32768  
 SF 100.6278714 MHz  
 WDW EM  
 SSB 0  
 LB 1.00 Hz  
 GB 0  
 PC 1.40

3g

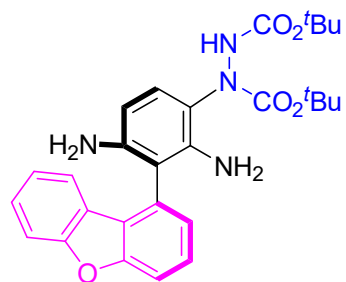

3g

7.612  
7.593  
7.558  
7.537  
7.519  
7.419  
7.416  
7.398  
7.380  
7.378  
7.320  
7.306  
7.260  
6.996  
6.936  
6.917  
6.205  
6.184

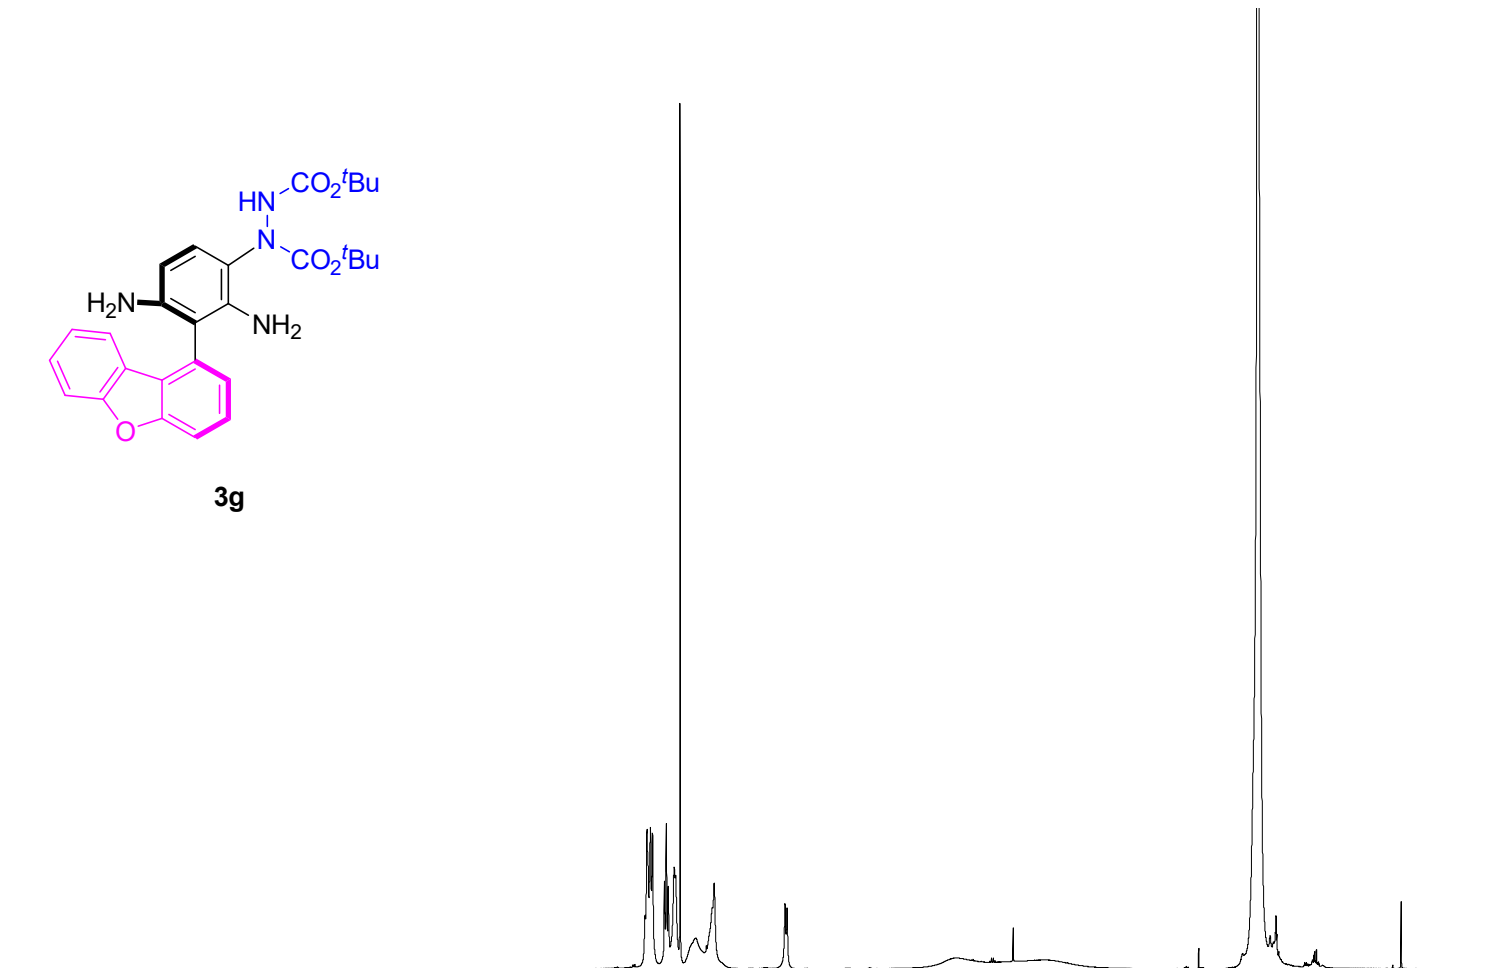

13 12 11 10 9 8 7 6 5 4 3 2 1 0 ppm

4.06  
1.23  
2.04  
2.02  
1.00  
18.02



Current Data Parameters  
NAME 20231124-400M  
EXPNO 249  
PROCNO 1

F2 - Acquisition Parameters  
Date\_ 20231123  
Time 23.42  
INSTRUM spect  
PROBHD 5 mm PADUL 13C  
PULPROG zg30  
TD 65536  
SOLVENT CDC13  
NS 8  
DS 2  
SWH 8223.685 Hz  
FIDRES 0.125483 Hz  
AQ 3.9845889 sec  
RG 29.75  
DW 60.800 usec  
DE 6.50 usec  
TE 292.3 K  
D1 1.00000000 sec  
TD0 1

==== CHANNEL f1 =====  
NUC1 1H  
P1 9.90 usec  
PLW1 23.00000000 W  
SFO1 400.1924713 MHz

F2 - Processing parameters  
SI 65536  
SF 400.1900137 MHz  
WDW EM  
SSB 0  
LB 0.30 Hz  
GB 0  
PC 1.00

3g

156.89  
156.56  
156.10  
155.23  
144.68  
143.22  
129.65  
128.87  
128.10  
127.22  
125.10  
123.55  
122.87  
122.18  
119.20  
111.15  
109.97  
103.99

81.58  
77.32  
77.00  
76.68

28.13  
28.10

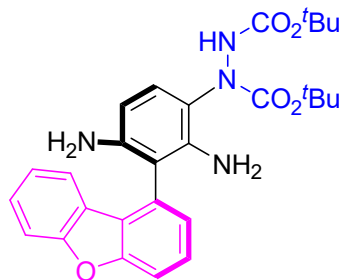

3g

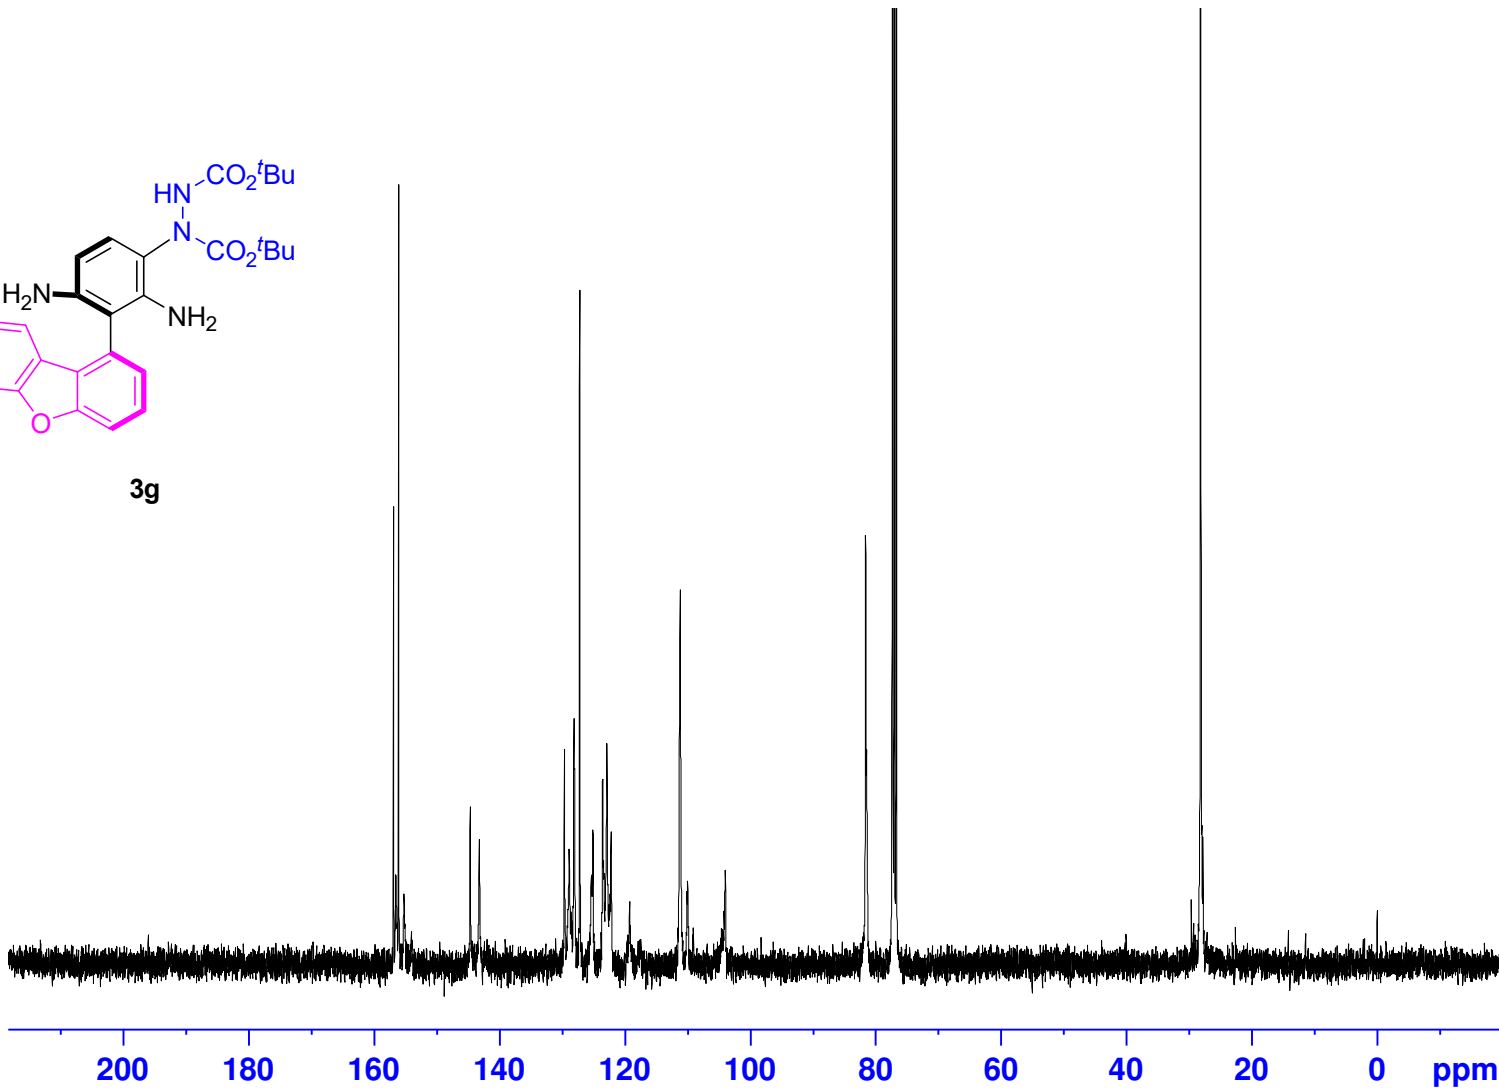

Current Data Parameters  
NAME 20231124-400M  
EXPNO 24  
PROCNO 1

F2 - Acquisition Parameters  
Date\_ 20231124  
Time 0.42  
INSTRUM spect  
PROBHD 5 mm PADUL 13C  
PULPROG zgpg30  
TD 65536  
SOLVENT CDC13  
NS 1024  
DS 4  
SWH 24038.461 Hz  
FIDRES 0.366798 Hz  
AQ 1.3631488 sec  
RG 68.24  
DW 20.800 usec  
DE 6.50 usec  
TE 292.7 K  
D1 2.00000000 sec  
D11 0.03000000 sec  
TD0 1

===== CHANNEL f1 =====  
NUC1 13C  
P1 9.80 usec  
PLW1 47.40000153 W  
SFO1 100.6379178 MHz

===== CHANNEL f2 =====  
CPDPRG[2] waltz16  
NUC2 1H  
PCPD2 90.00 usec  
PLW2 23.00000000 W  
PLW12 0.30712000 W  
PLW13 0.24877000 W  
SFO2 400.1916008 MHz

F2 - Processing parameters  
SI 32768  
SF 100.6278684 MHz  
WDW EM  
SSB 0  
LB 1.00 Hz  
GB 0  
PC 1.40

3h



Current Data Parameters  
NAME 20231219-400  
EXPNO 13  
PROCNO 1

F2 - Acquisition Parameters  
Date\_ 20231218  
Time 22.30  
INSTRUM spect  
PROBHD 5 mm PADUL 13C  
PULPROG zg30  
TD 65536  
SOLVENT CDC13  
NS 8  
DS 2  
SWH 8223.685 Hz  
FIDRES 0.125483 Hz  
AQ 3.9845889 sec  
RG 61.19  
DW 60.800 usec  
DE 6.50 usec  
TE 293.4 K  
D1 1.00000000 sec  
TD0 1

==== CHANNEL f1 =====  
NUC1 1H  
P1 9.90 usec  
PLW1 23.00000000 W  
SFO1 400.1924713 MHz

F2 - Processing parameters  
SI 65536  
SF 400.1900138 MHz  
WDW EM  
SSB 0  
LB 0.30 Hz  
GB 0  
PC 1.00

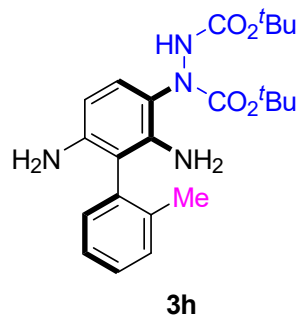

7.359  
7.346  
7.338  
7.298  
7.289  
7.278  
7.260  
7.224  
7.216  
7.204  
6.846  
6.826  
6.819  
6.115  
6.095

2.144  
1.454

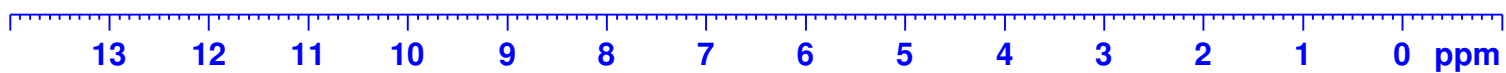

1.04  
2.13  
1.07  
2.02  
1.00  
3.08  
18.01

3h

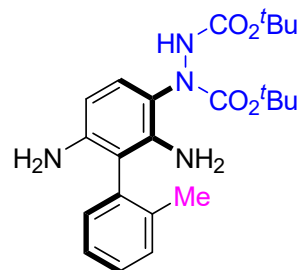

3h

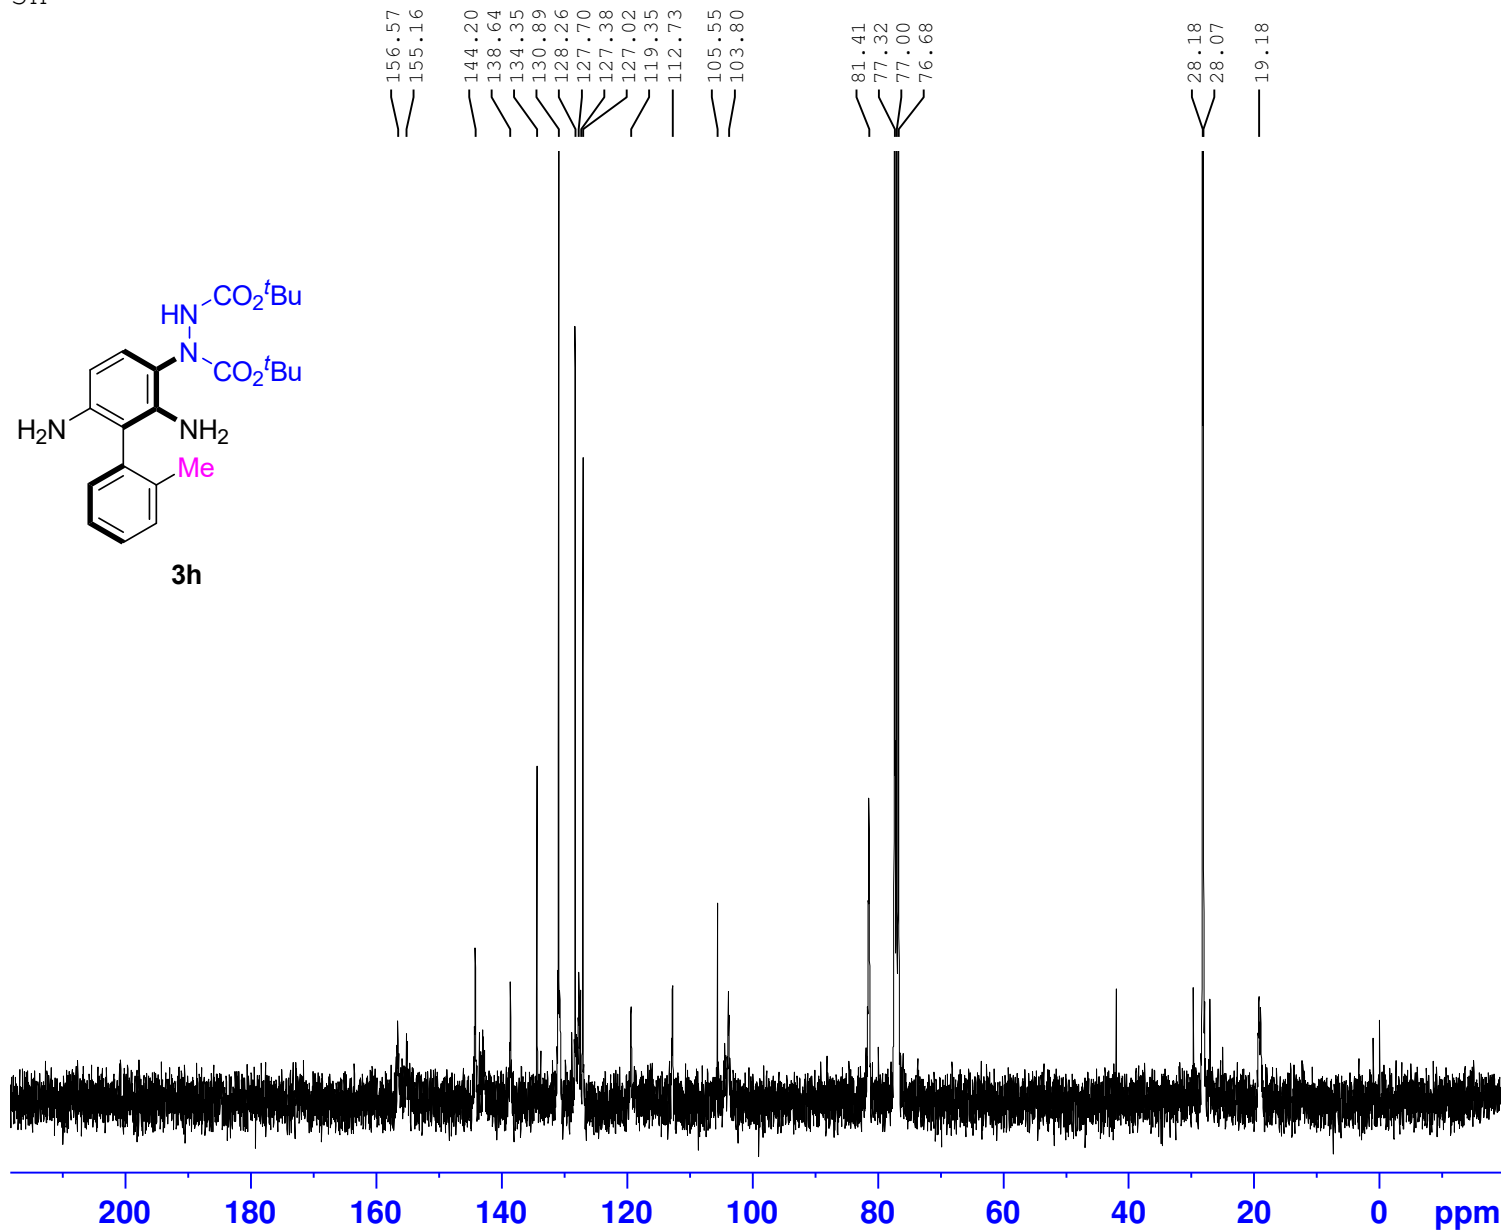

Current Data Parameters  
NAME 20231219-400  
EXPNO 14  
PROCNO 1

F2 - Acquisition Parameters  
Date\_ 20231218  
Time 23.29  
INSTRUM spect  
PROBHD 5 mm PADUL 13C  
PULPROG zgpg30  
TD 65536  
SOLVENT CDC13  
NS 1024  
DS 4  
SWH 24038.461 Hz  
FIDRES 0.366798 Hz  
AQ 1.3631488 sec  
RG 35.06  
DW 20.800 usec  
DE 6.50 usec  
TE 294.3 K  
D1 2.00000000 sec  
D11 0.03000000 sec  
TD0 1

=====  
CHANNEL f1  
NUC1 13C  
P1 9.80 usec  
PLW1 47.40000153 W  
SFO1 100.6379178 MHz

=====  
CHANNEL f2  
CPDPRG[2] waltz16  
NUC2 1H  
PCPD2 90.00 usec  
PLW2 23.00000000 W  
PLW12 0.30712000 W  
PLW13 0.24877000 W  
SFO2 400.1916008 MHz

F2 - Processing parameters  
SI 32768  
SF 100.6278634 MHz  
WDW EM  
SSB 0  
LB 1.00 Hz  
GB 0  
PC 1.40

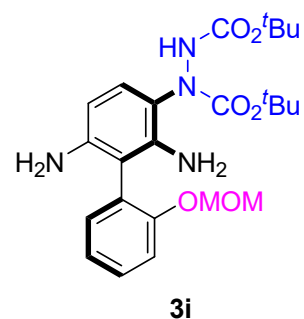

7.378  
7.360  
7.341  
7.265  
7.254  
7.233  
7.165  
7.147  
7.130  
6.904  
6.800  
6.119  
6.100

5.048

3.352

1.451

-0.000

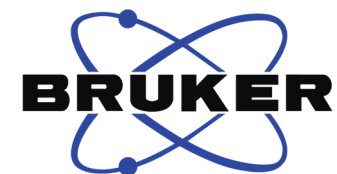

Current Data Parameters  
NAME 20231214-400M  
EXPNO 9  
PROCNO 1

F2 - Acquisition Parameters  
Date\_ 20231213  
Time 22.42  
INSTRUM spect  
PROBHD 5 mm PADUL 13C  
PULPROG zg30  
TD 65536  
SOLVENT CDC13  
NS 8  
DS 2  
SWH 8223.685 Hz  
FIDRES 0.125483 Hz  
AQ 3.9845889 sec  
RG 68.24  
DW 60.800 usec  
DE 6.50 usec  
TE 291.8 K  
D1 1.00000000 sec  
TD0 1

==== CHANNEL f1 =====  
NUC1 1H  
P1 9.90 usec  
PLW1 23.00000000 W  
SFO1 400.1924713 MHz

F2 - Processing parameters  
SI 65536  
SF 400.1900117 MHz  
WDW EM  
SSB 0  
LB 0.30 Hz  
GB 0  
PC 1.00



1.17  
2.18  
1.03  
1.94  
1.00  
2.13  
3.00  
18.01



3i

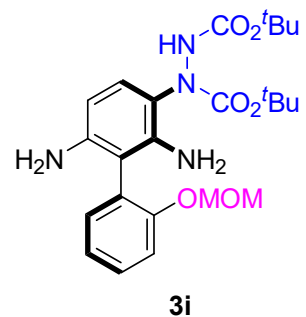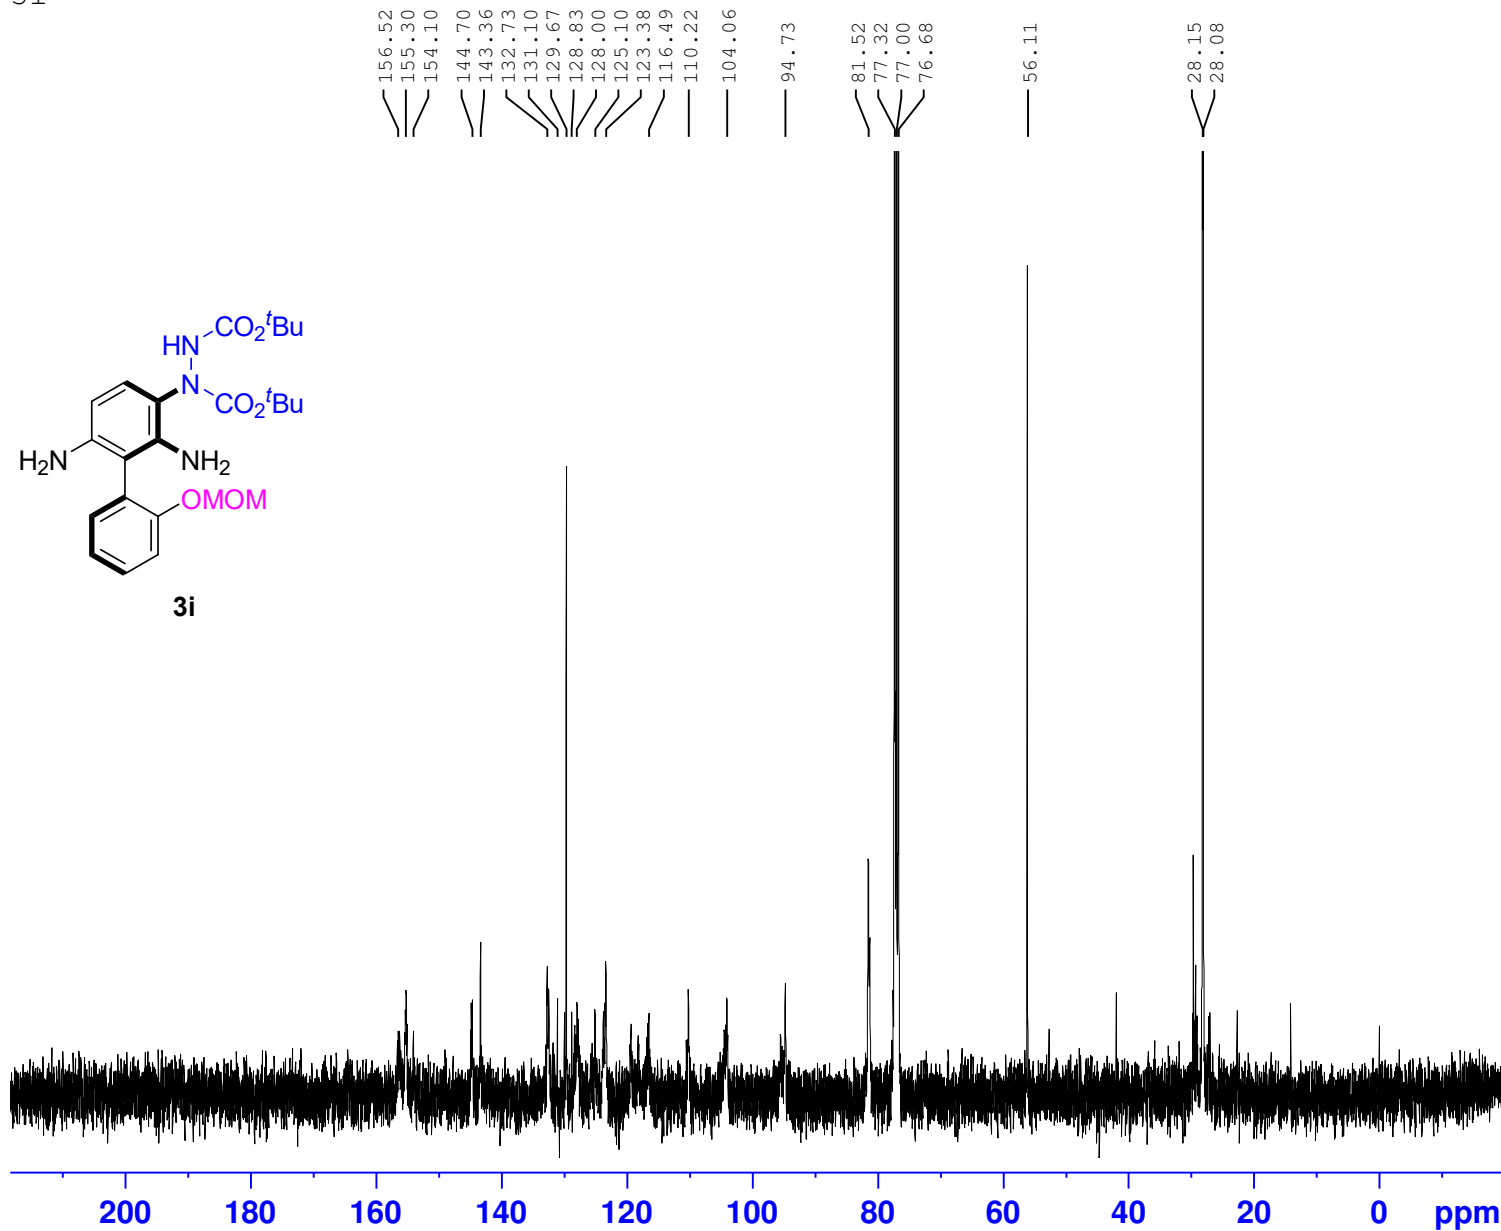

156.52  
155.30  
154.10  
144.70  
143.36  
132.73  
131.10  
129.67  
128.83  
128.00  
125.10  
123.38  
116.49  
110.22  
104.06  
94.73  
81.52  
77.32  
77.00  
76.68  
56.11  
28.15  
28.08



Current Data Parameters  
 NAME 20231214-400M  
 EXPNO 10  
 PROCNO 1

F2 - Acquisition Parameters  
 Date\_ 20231213  
 Time 23.42  
 INSTRUM spect  
 PROBHD 5 mm PADUL 13C  
 PULPROG zgpg30  
 TD 65536  
 SOLVENT CDCl3  
 NS 1024  
 DS 4  
 SWH 24038.461 Hz  
 FIDRES 0.366798 Hz  
 AQ 1.3631488 sec  
 RG 61.19  
 DW 20.800 usec  
 DE 6.50 usec  
 TE 292.3 K  
 D1 2.00000000 sec  
 D11 0.03000000 sec  
 TD0 1

===== CHANNEL f1 =====  
 NUC1 13C  
 P1 9.80 usec  
 PLW1 47.40000153 W  
 SFO1 100.6379178 MHz

===== CHANNEL f2 =====  
 CPDPRG[2] waltz16  
 NUC2 1H  
 PCPD2 90.00 usec  
 PLW2 23.00000000 W  
 PLW12 0.30712000 W  
 PLW13 0.24877000 W  
 SFO2 400.1916008 MHz

F2 - Processing parameters  
 SI 32768  
 SF 100.6278636 MHz  
 WDW EM  
 SSB 0  
 LB 1.00 Hz  
 GB 0  
 PC 1.40

3j

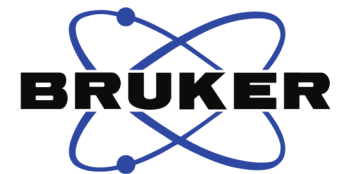

Current Data Parameters  
 NAME 20231223-400M  
 EXPNO 20  
 PROCNO 1

F2 - Acquisition Parameters  
 Date\_ 20231223  
 Time 0.32  
 INSTRUM spect  
 PROBHD 5 mm PADUL 13C  
 PULPROG zg30  
 TD 65536  
 SOLVENT CDC13  
 NS 8  
 DS 2  
 SWH 8223.685 Hz  
 FIDRES 0.125483 Hz  
 AQ 3.9845889 sec  
 RG 53.3  
 DW 60.800 usec  
 DE 6.50 usec  
 TE 292.1 K  
 D1 1.00000000 sec  
 TD0 1

==== CHANNEL f1 =====  
 NUC1 1H  
 P1 9.90 usec  
 PLW1 23.00000000 W  
 SFO1 400.1924713 MHz

F2 - Processing parameters  
 SI 65536  
 SF 400.1900137 MHz  
 WDW EM  
 SSB 0  
 LB 0.30 Hz  
 GB 0  
 PC 1.00

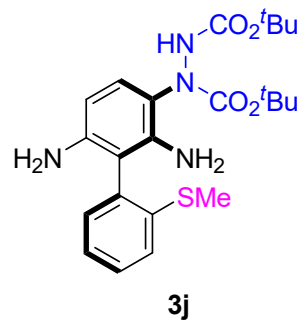

7.412  
7.394  
7.375  
7.361  
7.294  
7.274  
7.260  
7.238  
7.221  
7.025  
7.006  
6.996  
6.986  
6.818  
6.132  
6.113

2.353

1.449



1.10

1.08

2.09

2.04

1.00

3.03

18.03

3j

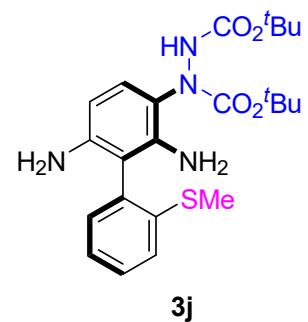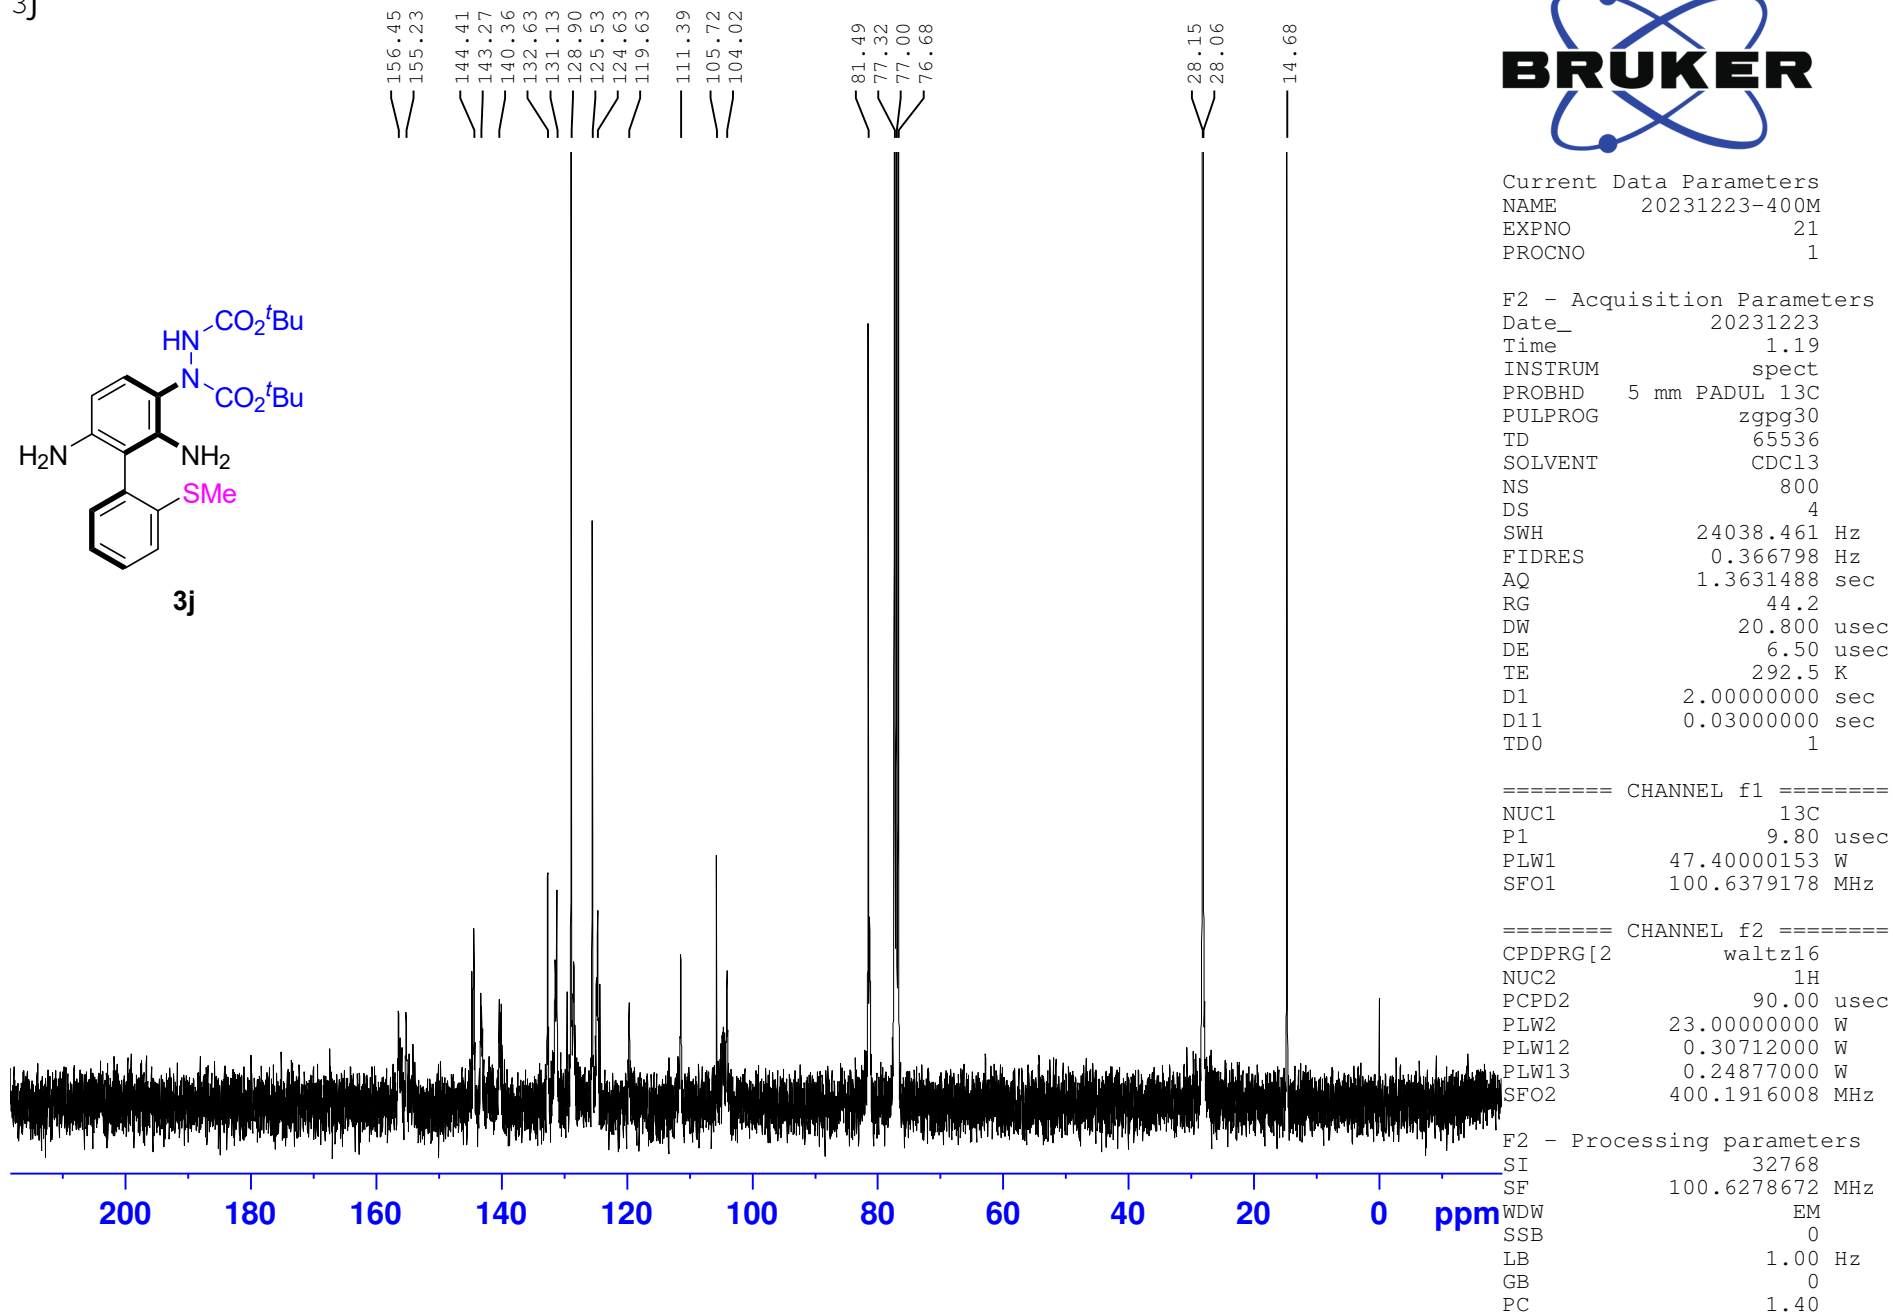

3k

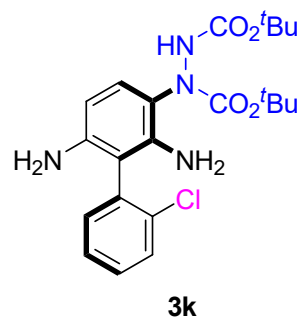

7.567  
7.549  
7.404  
7.383  
7.360  
7.344  
7.260  
7.074  
7.053  
6.996  
6.840  
6.694  
6.125  
6.104

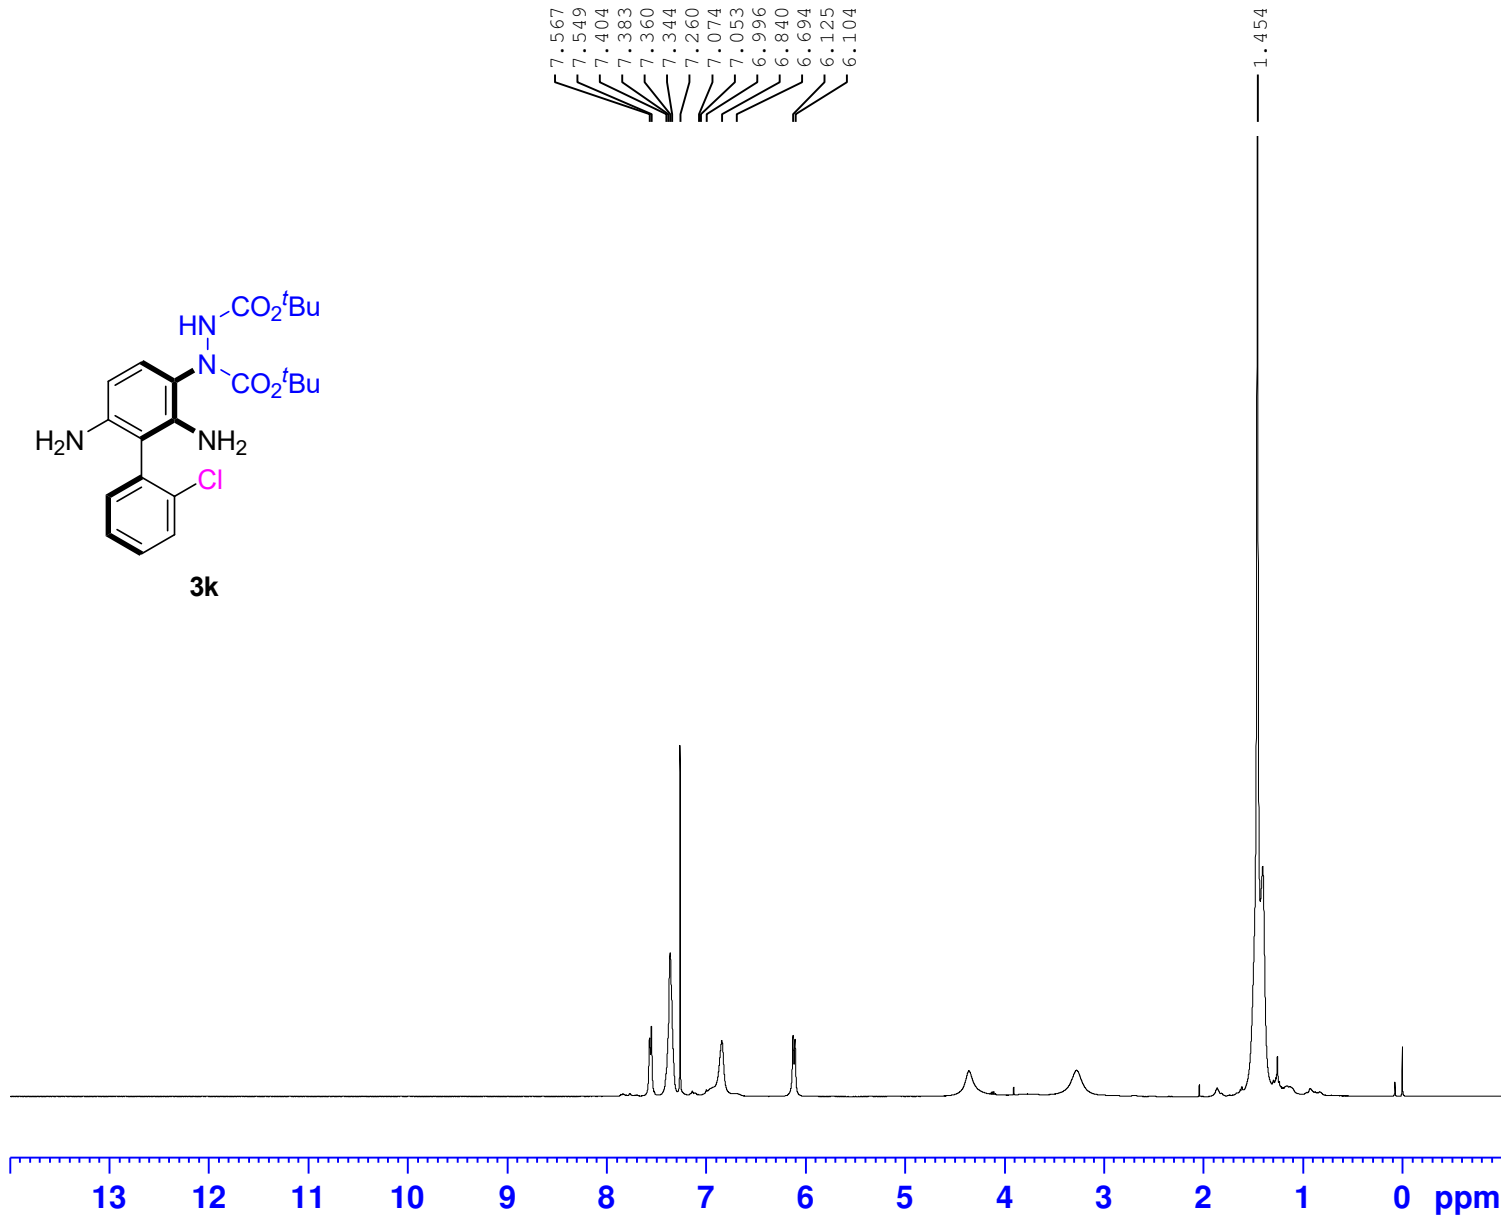

Current Data Parameters  
NAME 20231221-400  
EXPNO 12  
PROCNO 1

F2 - Acquisition Parameters  
Date\_ 20231221  
Time 0.02  
INSTRUM spect  
PROBHD 5 mm PADUL 13C  
PULPROG zg30  
TD 65536  
SOLVENT CDC13  
NS 8  
DS 2  
SWH 8223.685 Hz  
FIDRES 0.125483 Hz  
AQ 3.9845889 sec  
RG 29.75  
DW 60.800 usec  
DE 6.50 usec  
TE 293.1 K  
D1 1.00000000 sec  
TD0 1

==== CHANNEL f1 =====  
NUC1 1H  
P1 9.90 usec  
PLW1 23.00000000 W  
SFO1 400.1924713 MHz

F2 - Processing parameters  
SI 65536  
SF 400.1900137 MHz  
WDW EM  
SSB 0  
LB 0.30 Hz  
GB 0  
PC 1.00

1.03  
3.07  
2.03  
1.00  
18.22

3k

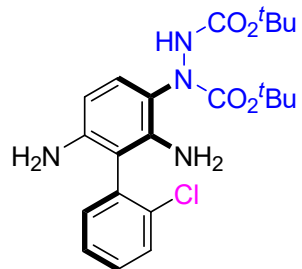

3k

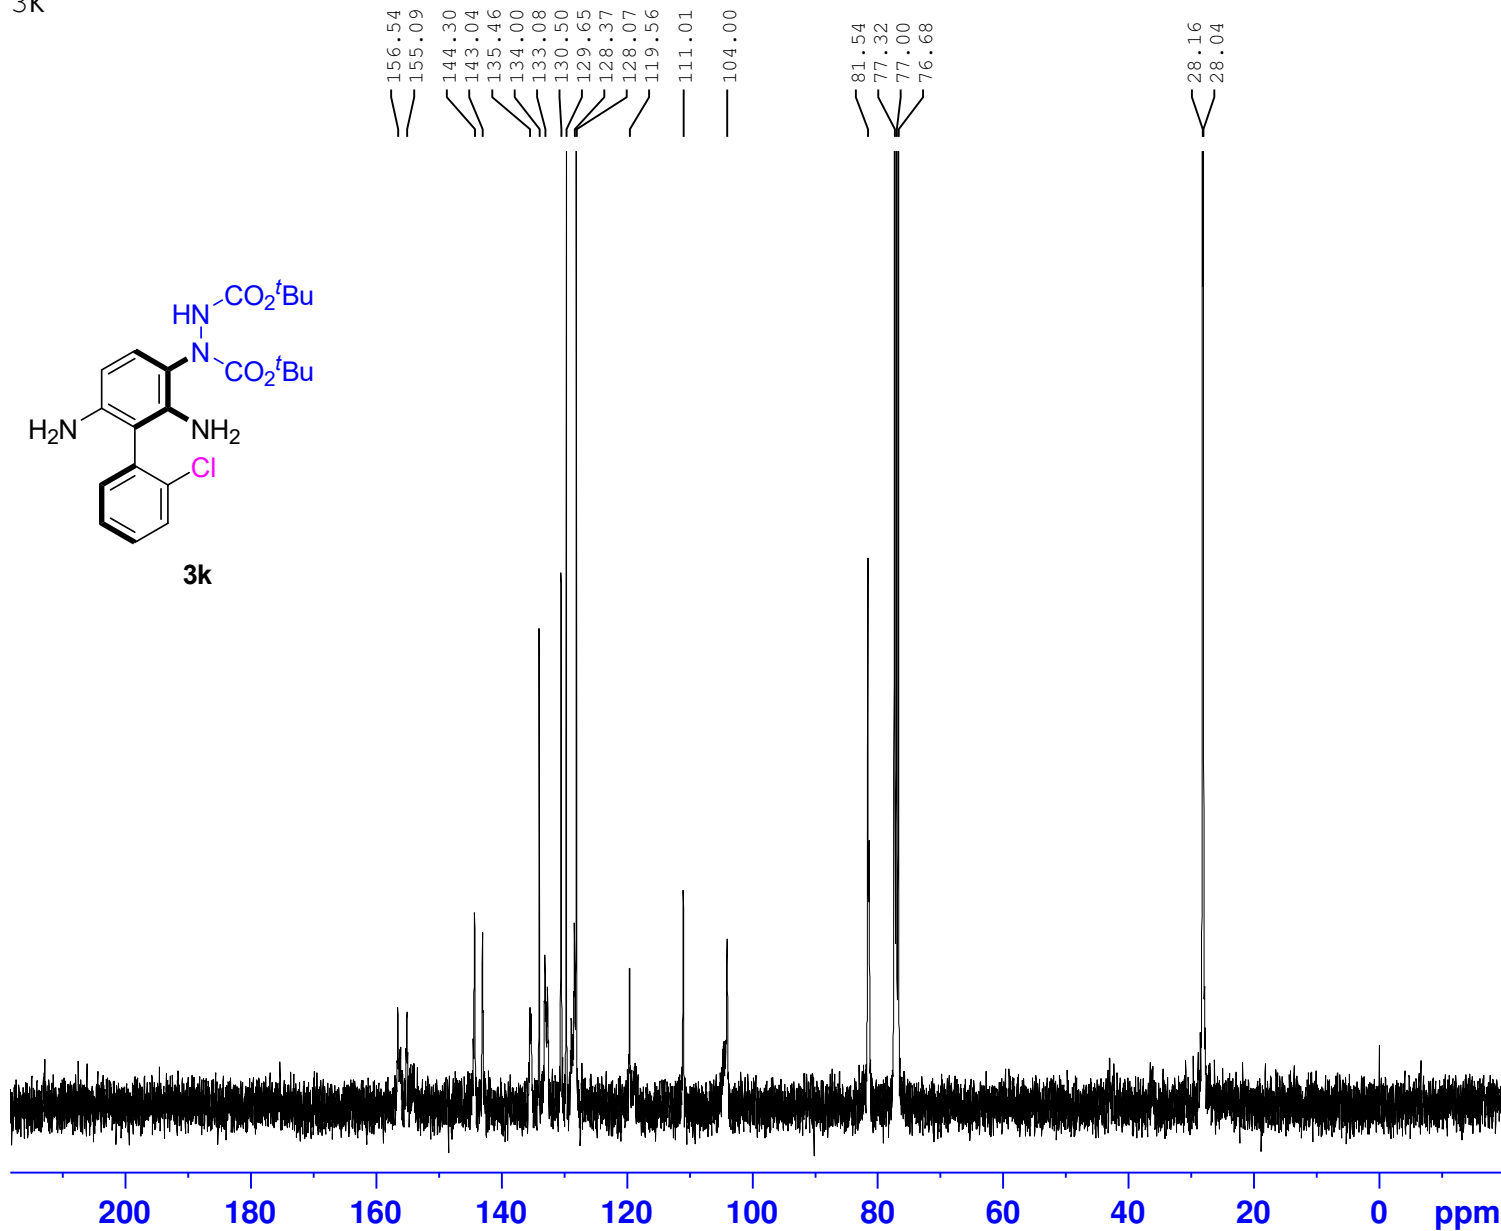

Current Data Parameters  
NAME 20231221-400  
EXPNO 13  
PROCNO 1

F2 - Acquisition Parameters  
Date\_ 20231221  
Time 1.00  
INSTRUM spect  
PROBHD 5 mm PADUL 13C  
PULPROG zgpg30  
TD 65536  
SOLVENT CDC13  
NS 1000  
DS 4  
SWH 24038.461 Hz  
FIDRES 0.366798 Hz  
AQ 1.3631488 sec  
RG 35.06  
DW 20.800 usec  
DE 6.50 usec  
TE 293.8 K  
D1 2.00000000 sec  
D11 0.03000000 sec  
TD0 1

==== CHANNEL f1 =====  
NUC1 13C  
P1 9.80 usec  
PLW1 47.40000153 W  
SFO1 100.6379178 MHz

==== CHANNEL f2 =====  
CPDPRG[2] waltz16  
NUC2 1H  
PCPD2 90.00 usec  
PLW2 23.00000000 W  
PLW12 0.30712000 W  
PLW13 0.24877000 W  
SFO2 400.1916008 MHz

F2 - Processing parameters  
SI 32768  
SF 100.6278663 MHz  
WDW EM  
SSB 0  
LB 1.00 Hz  
GB 0  
PC 1.40

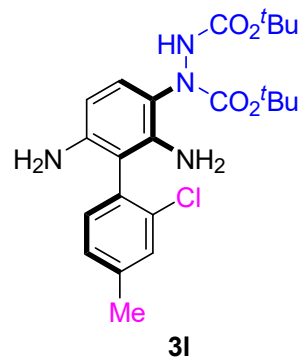

7.382  
7.260  
7.237  
7.218  
7.192  
7.174  
6.993  
6.973  
6.947  
6.809  
6.120  
6.100

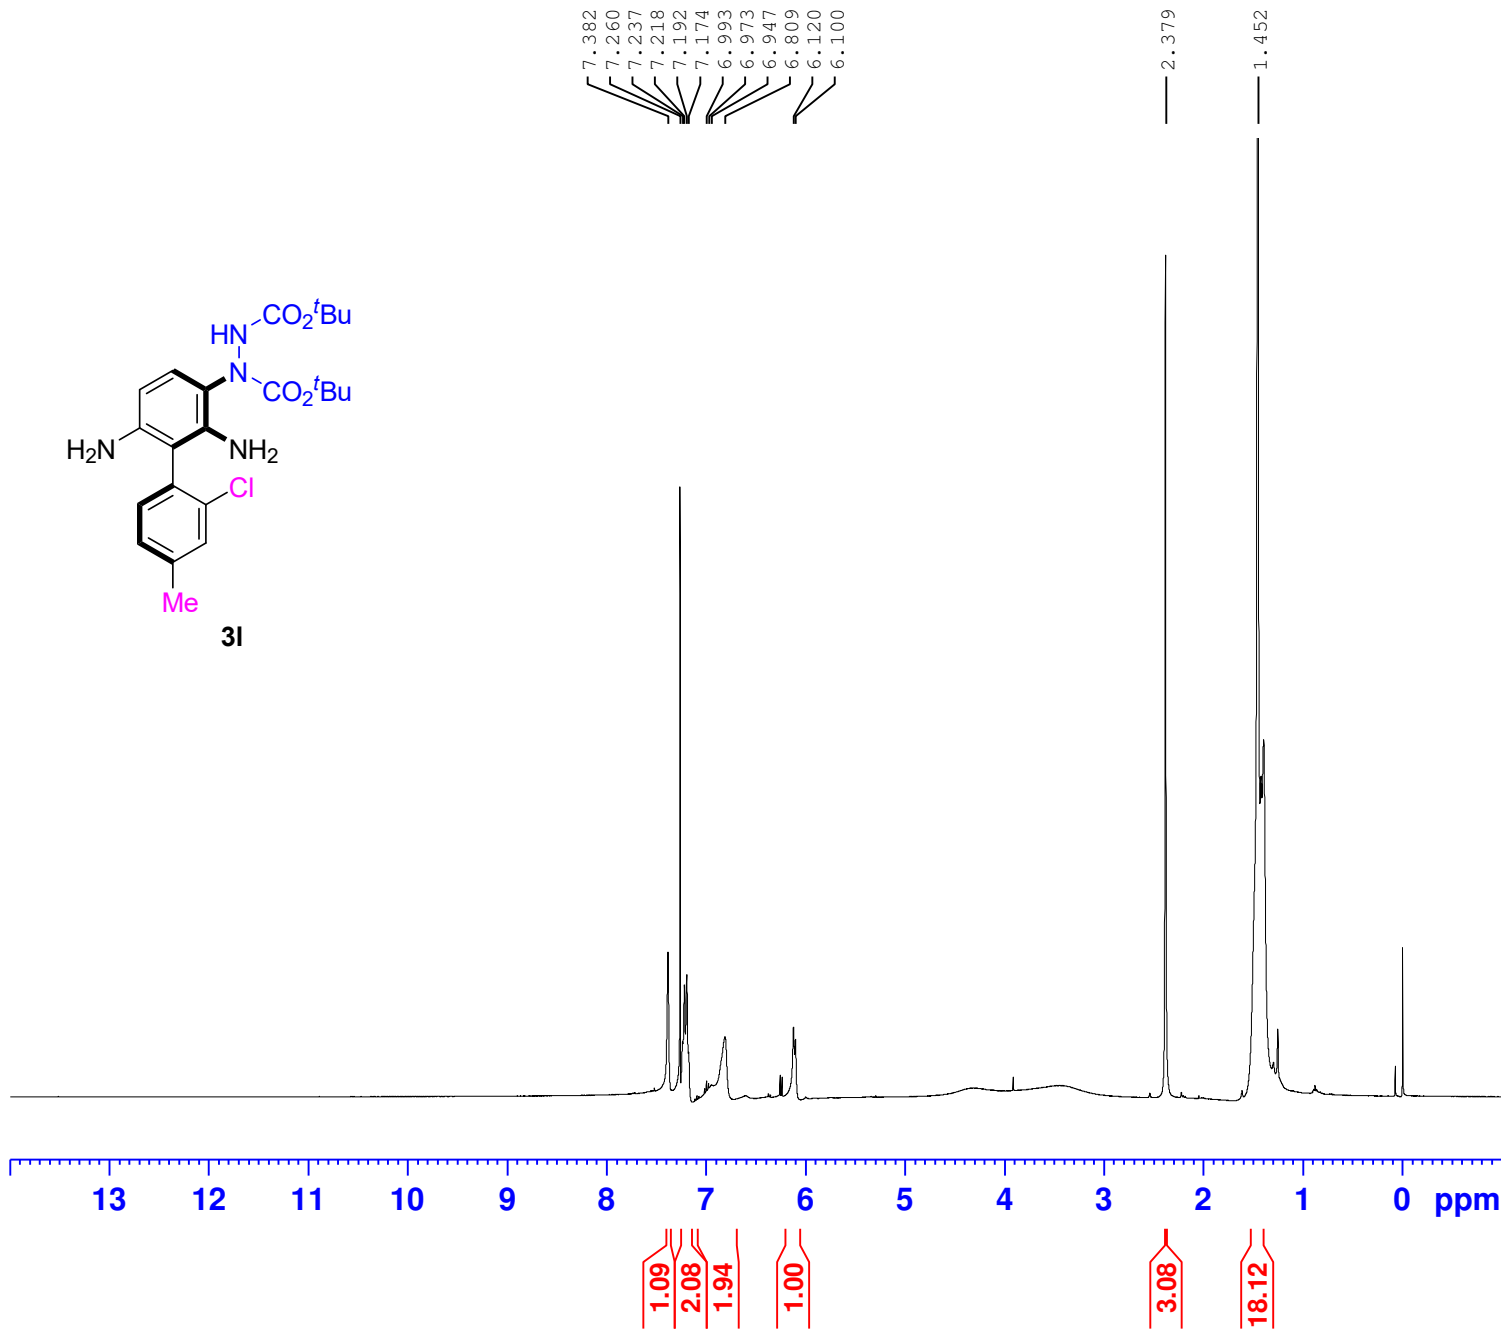

Current Data Parameters  
NAME 20231222-400  
EXPNO 20  
PROCNO 1

F2 - Acquisition Parameters  
Date\_ 20231222  
Time 1.30  
INSTRUM spect  
PROBHD 5 mm PADUL 13C  
PULPROG zg30  
TD 65536  
SOLVENT CDC13  
NS 8  
DS 2  
SWH 8223.685 Hz  
FIDRES 0.125483 Hz  
AQ 3.9845889 sec  
RG 68.24  
DW 60.800 usec  
DE 6.50 usec  
TE 290.4 K  
D1 1.00000000 sec  
TD0 1

==== CHANNEL f1 =====  
NUC1 1H  
P1 9.90 usec  
PLW1 23.00000000 W  
SFO1 400.1924713 MHz

F2 - Processing parameters  
SI 65536  
SF 400.1900137 MHz  
WDW EM  
SSB 0  
LB 0.30 Hz  
GB 0  
PC 1.00

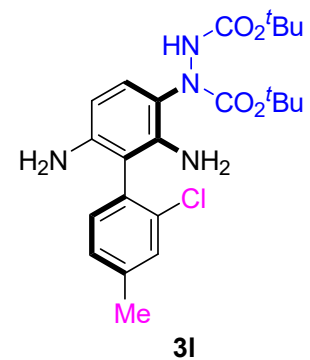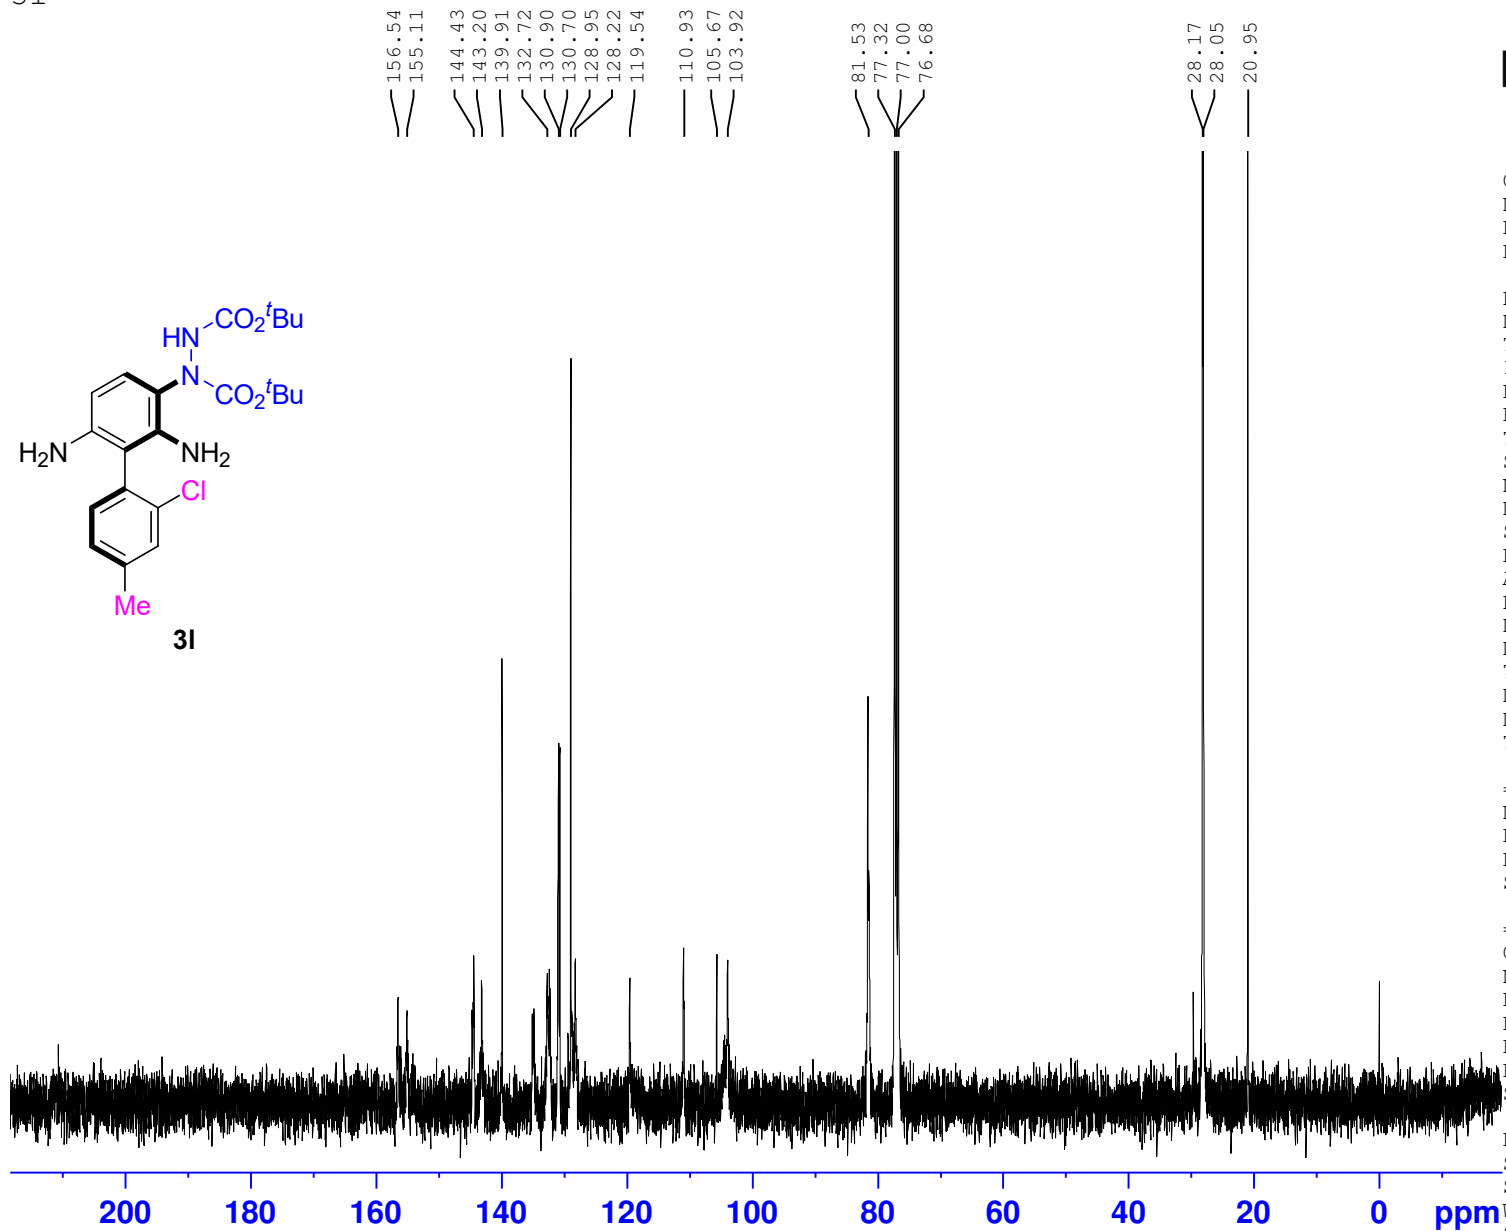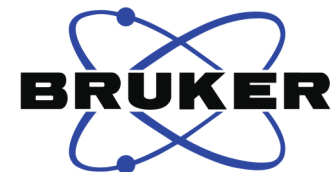

Current Data Parameters  
 NAME 20231222-400  
 EXPNO 19  
 PROCNO 1

F2 - Acquisition Parameters  
 Date\_ 20231222  
 Time 1.28  
 INSTRUM spect  
 PROBHD 5 mm PADUL 13C  
 PULPROG zgpg30  
 TD 65536  
 SOLVENT CDC13  
 NS 1300  
 DS 4  
 SWH 24038.461 Hz  
 FIDRES 0.366798 Hz  
 AQ 1.3631488 sec  
 RG 35.06  
 DW 20.800 usec  
 DE 6.50 usec  
 TE 290.9 K  
 D1 2.00000000 sec  
 D11 0.03000000 sec  
 TD0 1

===== CHANNEL f1 =====  
 NUC1 13C  
 P1 9.80 usec  
 PLW1 47.40000153 W  
 SFO1 100.6379178 MHz

===== CHANNEL f2 =====  
 CPDPRG[2] waltz16  
 NUC2 1H  
 PCPD2 90.00 usec  
 PLW2 23.00000000 W  
 PLW12 0.30712000 W  
 PLW13 0.24877000 W  
 SFO2 400.1916008 MHz

F2 - Processing parameters  
 SI 32768  
 SF 100.6278647 MHz  
 WDW EM  
 SSB 0  
 LB 1.00 Hz  
 GB 0  
 PC 1.40

3m

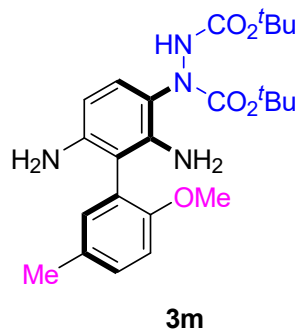

7.260  
7.155  
7.136  
7.054  
6.934  
6.913  
6.802  
6.119  
6.100

3.723

2.296

1.455

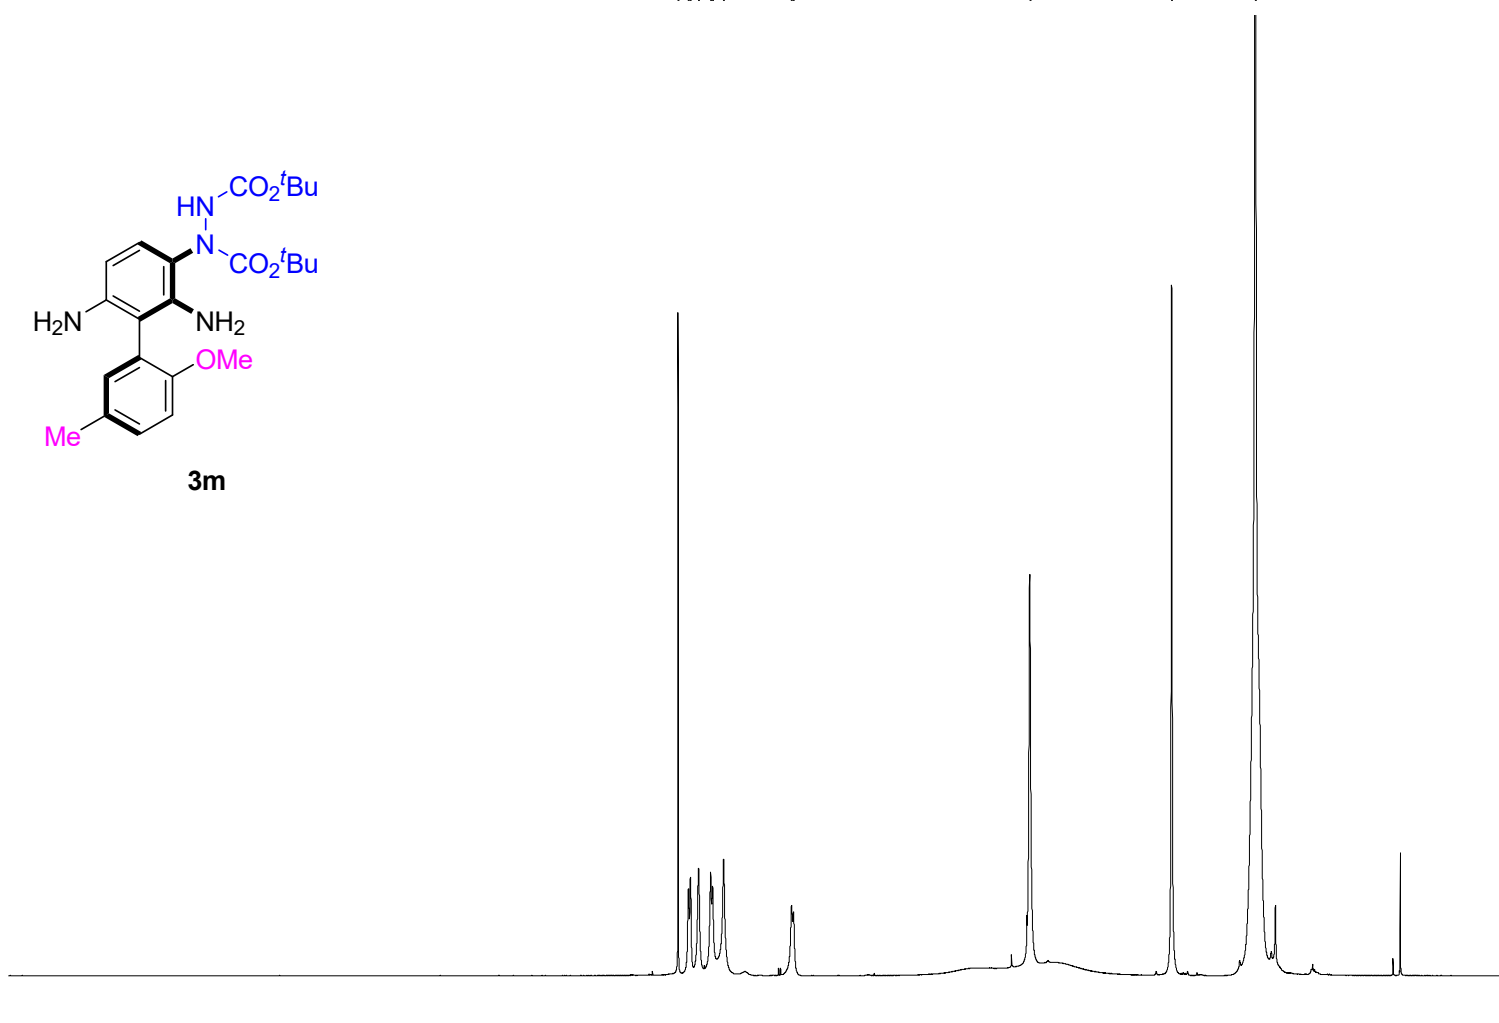

Current Data Parameters  
NAME 20231229-400  
EXPNO 29  
PROCNO 1

F2 - Acquisition Parameters  
Date\_ 20231229  
Time 2.20  
INSTRUM spect  
PROBHD 5 mm PADUL 13C  
PULPROG zg30  
TD 65536  
SOLVENT CDC13  
NS 8  
DS 2  
SWH 8223.685 Hz  
FIDRES 0.125483 Hz  
AQ 3.9845889 sec  
RG 53.3  
DW 60.800 usec  
DE 6.50 usec  
TE 291.9 K  
D1 1.00000000 sec  
TD0 1

==== CHANNEL f1 =====  
NUC1 1H  
P1 9.90 usec  
PLW1 23.00000000 W  
SFO1 400.1924713 MHz

F2 - Processing parameters  
SI 65536  
SF 400.1900138 MHz  
WDW EM  
SSB 0  
LB 0.30 Hz  
GB 0  
PC 1.00

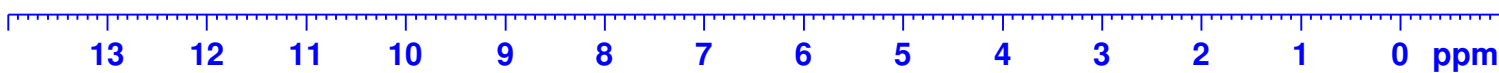

1.10  
1.06  
2.90  
1.00  
3.09  
3.00  
18.36



3m

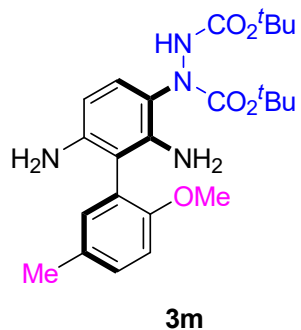

3m

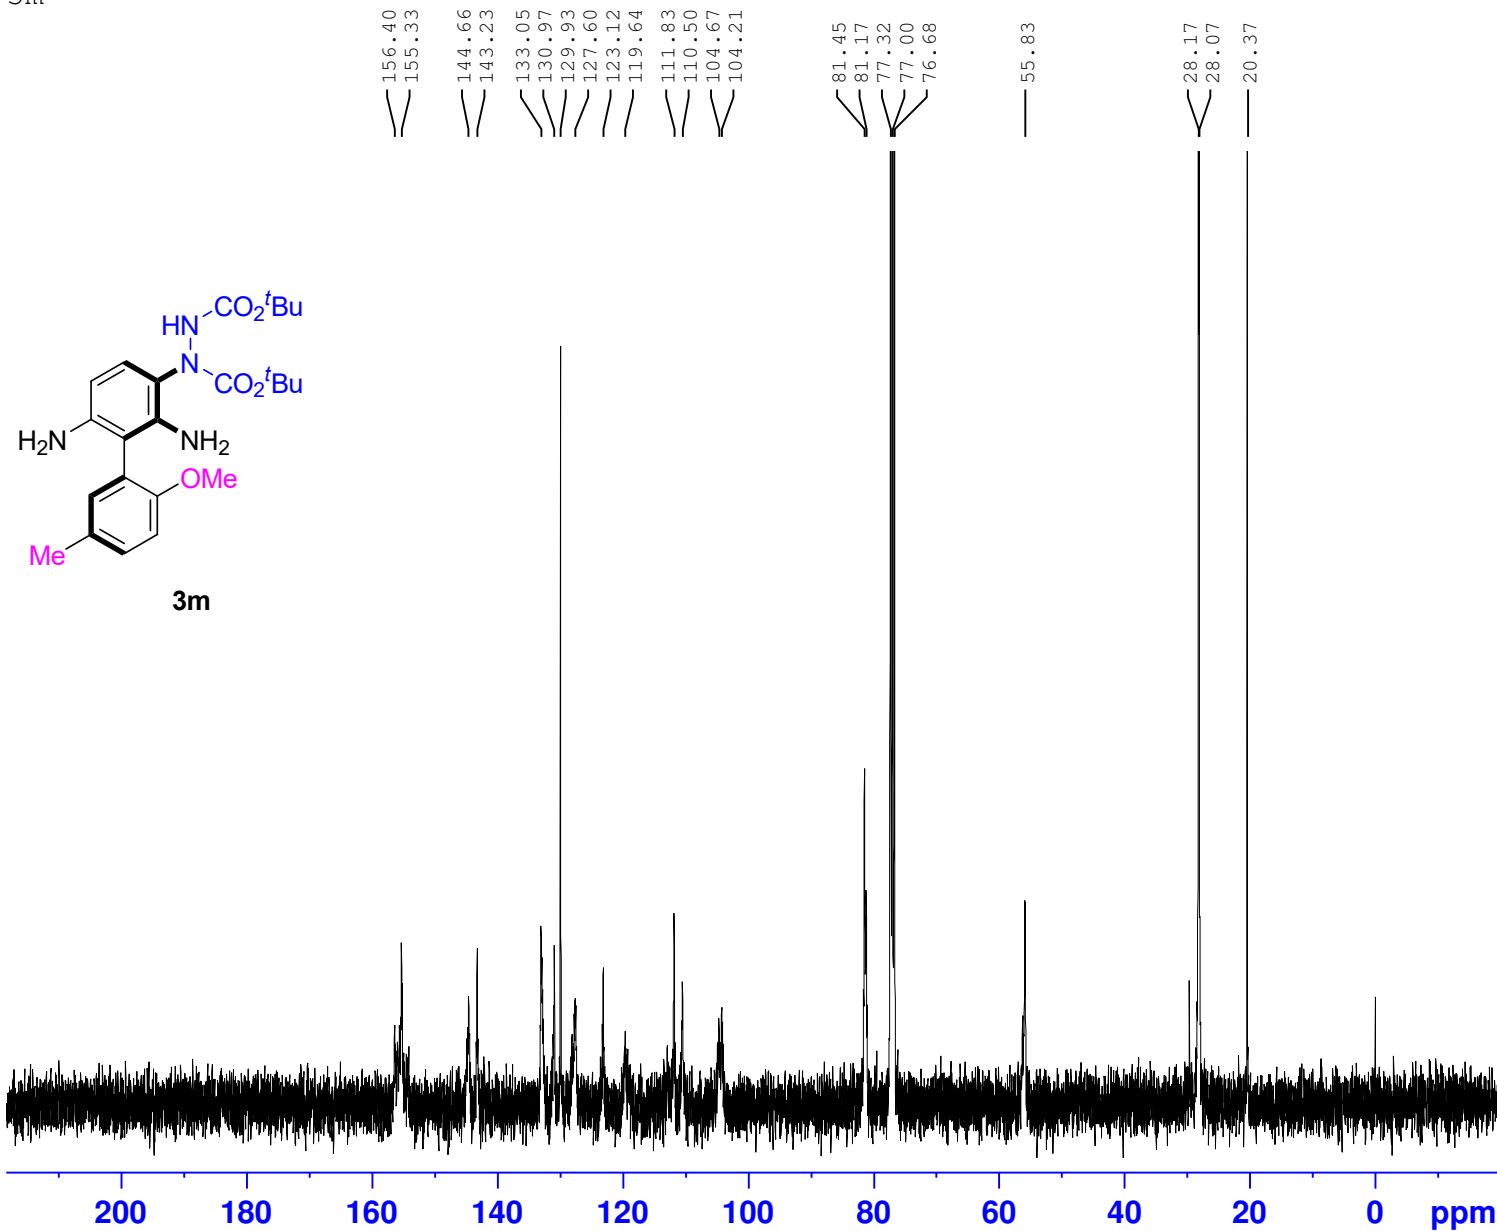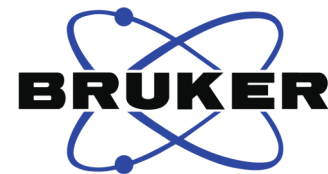

Current Data Parameters  
NAME 20231229-400  
EXPNO 28  
PROCNO 1

F2 - Acquisition Parameters  
Date\_ 20231229  
Time 2.18  
INSTRUM spect  
PROBHD 5 mm PADUL 13C  
PULPROG zgpg30  
TD 65536  
SOLVENT CDC13  
NS 1024  
DS 4  
SWH 24038.461 Hz  
FIDRES 0.366798 Hz  
AQ 1.3631488 sec  
RG 37.77  
DW 20.800 usec  
DE 6.50 usec  
TE 292.3 K  
D1 2.00000000 sec  
D11 0.03000000 sec  
TD0 1

==== CHANNEL f1 =====  
NUC1 13C  
P1 9.80 usec  
PLW1 47.40000153 W  
SFO1 100.6379178 MHz

==== CHANNEL f2 =====  
CPDPRG[2] waltz16  
NUC2 1H  
PCPD2 90.00 usec  
PLW2 23.00000000 W  
PLW12 0.30712000 W  
PLW13 0.24877000 W  
SFO2 400.1916008 MHz

F2 - Processing parameters  
SI 32768  
SF 100.6278656 MHz  
WDW EM  
SSB 0  
LB 1.00 Hz  
GB 0  
PC 1.40

3n

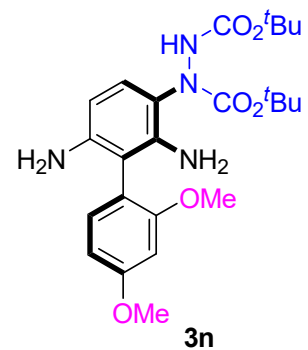

7.260  
7.148  
7.137  
7.129  
6.961  
6.942  
6.922  
6.835  
6.607  
6.590  
6.104  
6.085

3.836  
3.725

1.447

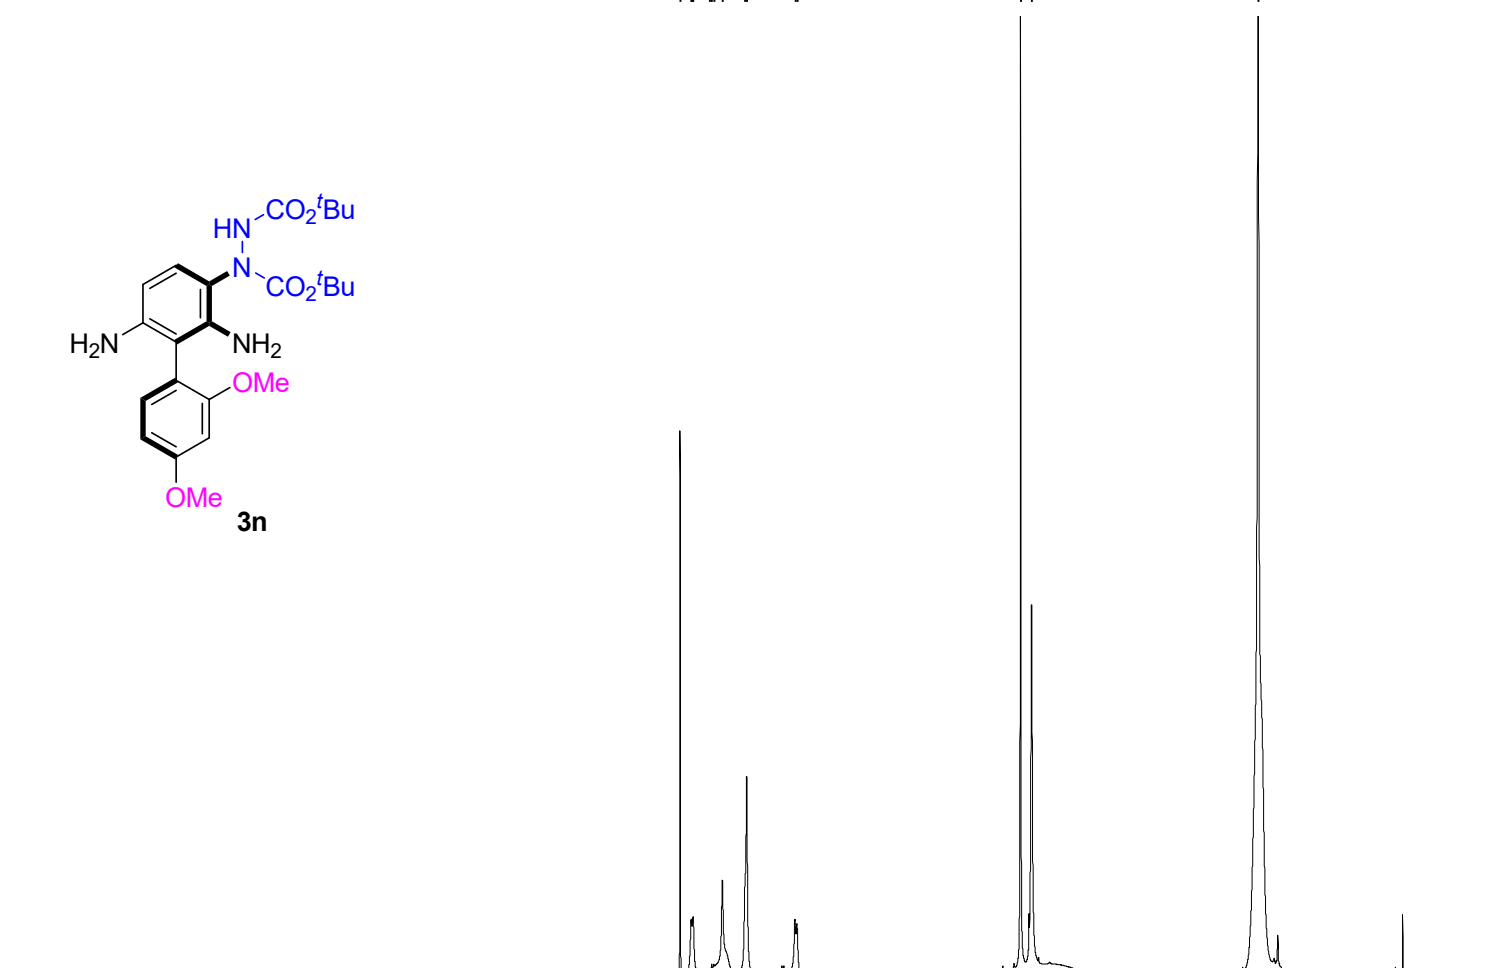

13 12 11 10 9 8 7 6 5 4 3 2 1 0 ppm

1.04  
1.90  
2.22  
1.00

3.30  
3.25

18.31



Current Data Parameters  
NAME 20231229-400  
EXPNO 31  
PROCNO 1

F2 - Acquisition Parameters  
Date\_ 20231229  
Time 3.23  
INSTRUM spect  
PROBHD 5 mm PADUL 13C  
PULPROG zg30  
TD 65536  
SOLVENT CDC13  
NS 8  
DS 2  
SWH 8223.685 Hz  
FIDRES 0.125483 Hz  
AQ 3.9845889 sec  
RG 29.75  
DW 60.800 usec  
DE 6.50 usec  
TE 291.8 K  
D1 1.00000000 sec  
TD0 1

==== CHANNEL f1 =====  
NUC1 1H  
P1 9.90 usec  
PLW1 23.00000000 W  
SFO1 400.1924713 MHz

F2 - Processing parameters  
SI 65536  
SF 400.1900137 MHz  
WDW EM  
SSB 0  
LB 0.30 Hz  
GB 0  
PC 1.00

3n

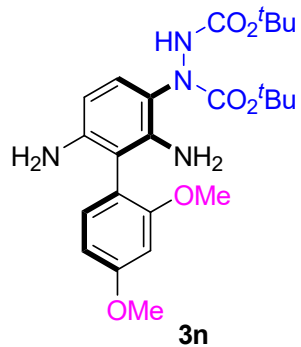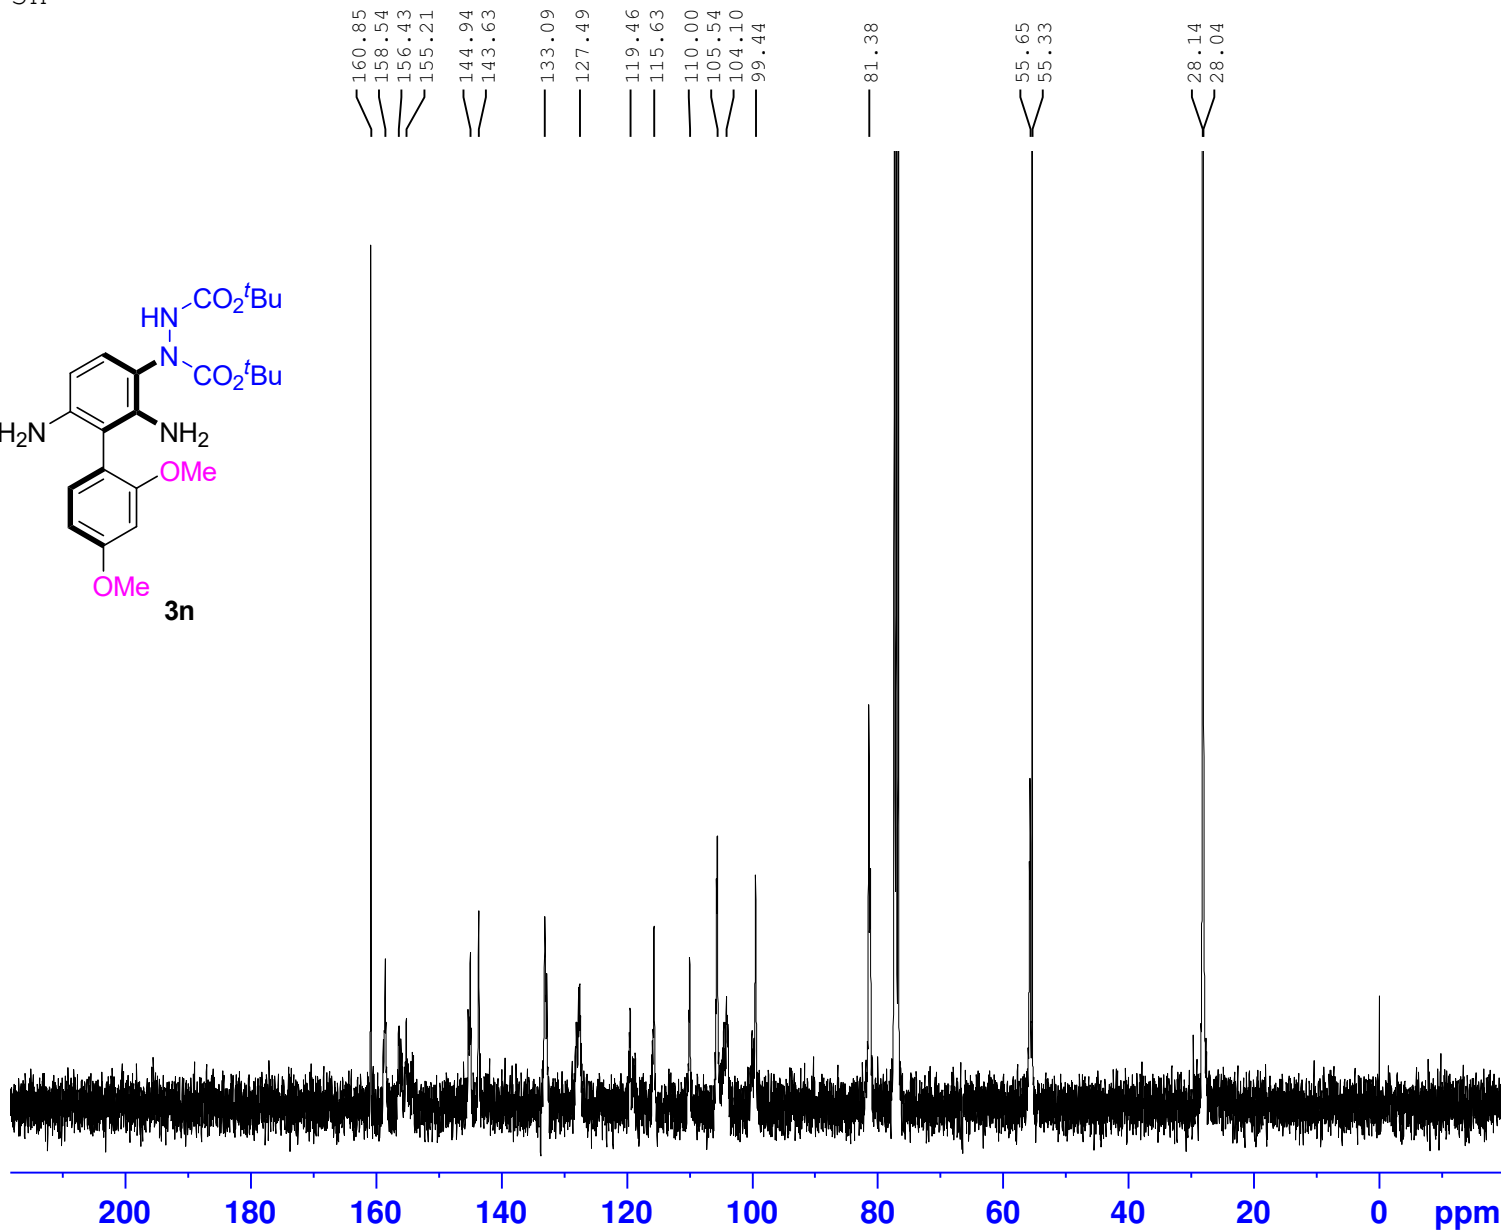

Current Data Parameters  
 NAME 20231229-400  
 EXPNO 30  
 PROCNO 1

F2 - Acquisition Parameters  
 Date\_ 20231229  
 Time 3.22  
 INSTRUM spect  
 PROBHD 5 mm PADUL 13C  
 PULPROG zgpg30  
 TD 65536  
 SOLVENT CDC13  
 NS 1024  
 DS 4  
 SWH 24038.461 Hz  
 FIDRES 0.366798 Hz  
 AQ 1.3631488 sec  
 RG 35.06  
 DW 20.800 usec  
 DE 6.50 usec  
 TE 292.2 K  
 D1 2.00000000 sec  
 D11 0.03000000 sec  
 TD0 1

===== CHANNEL f1 =====  
 NUC1 13C  
 P1 9.80 usec  
 PLW1 47.40000153 W  
 SFO1 100.6379178 MHz

===== CHANNEL f2 =====  
 CPDPRG[2] waltz16  
 NUC2 1H  
 PCPD2 90.00 usec  
 PLW2 23.00000000 W  
 PLW12 0.30712000 W  
 PLW13 0.24877000 W  
 SFO2 400.1916008 MHz

F2 - Processing parameters  
 SI 32768  
 SF 100.6278678 MHz  
 WDW EM  
 SSB 0  
 LB 1.00 Hz  
 GB 0  
 PC 1.40

3o

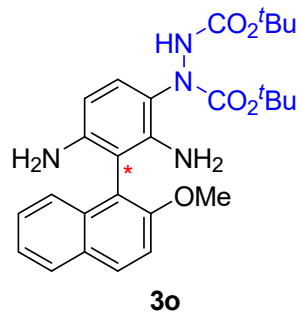

7.935  
7.912  
7.844  
7.822  
7.553  
7.544  
7.539  
7.530  
7.519  
7.413  
7.390  
7.363  
6.996  
6.948  
6.868  
6.198  
6.178

3.877

1.456

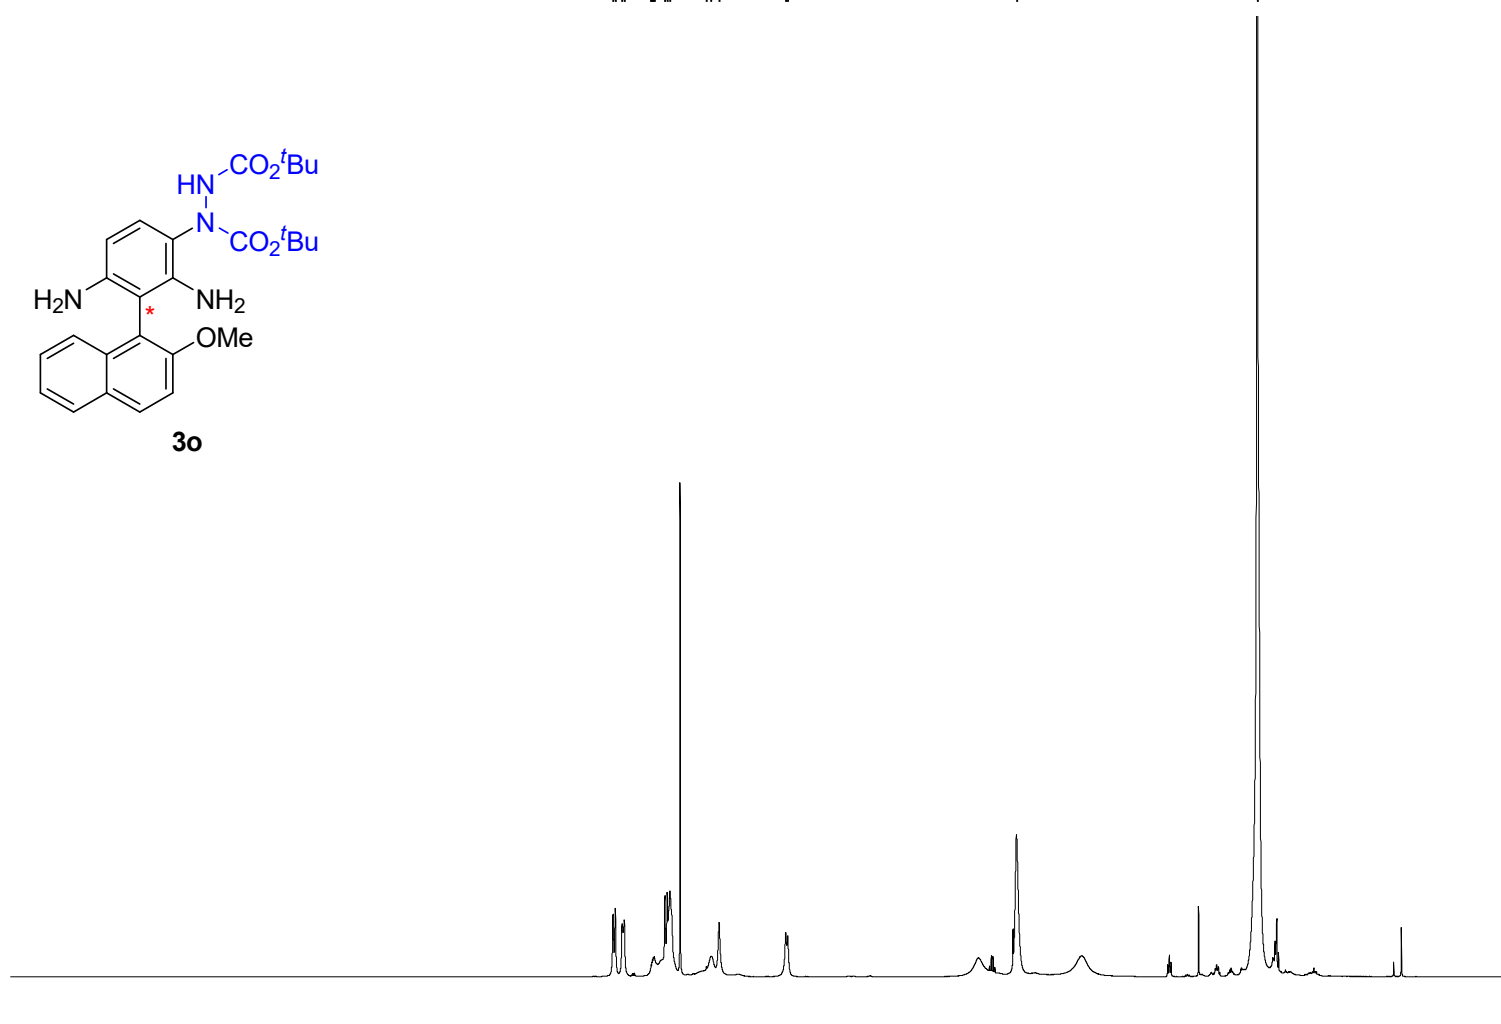

Current Data Parameters  
NAME 20231207-400M  
EXPNO 29  
PROCNO 1

F2 - Acquisition Parameters  
Date\_ 20231207  
Time 0.16  
INSTRUM spect  
PROBHD 5 mm PADUL 13C  
PULPROG zg30  
TD 65536  
SOLVENT CDC13  
NS 6  
DS 0  
SWH 8223.685 Hz  
FIDRES 0.125483 Hz  
AQ 3.9845889 sec  
RG 29.75  
DW 60.800 usec  
DE 6.50 usec  
TE 293.1 K  
D1 1.00000000 sec  
TD0 1

==== CHANNEL f1 =====  
NUC1 1H  
P1 9.90 usec  
PLW1 23.00000000 W  
SFO1 400.1924713 MHz

F2 - Processing parameters  
SI 65536  
SF 400.1900138 MHz  
WDW EM  
SSB 0  
LB 0.30 Hz  
GB 0  
PC 1.00

13 12 11 10 9 8 7 6 5 4 3 2 1 0 ppm

1.04  
1.06  
4.02  
2.05  
1.00  
3.22  
18.00

3o

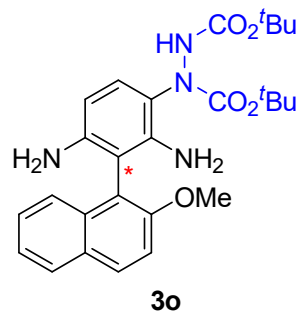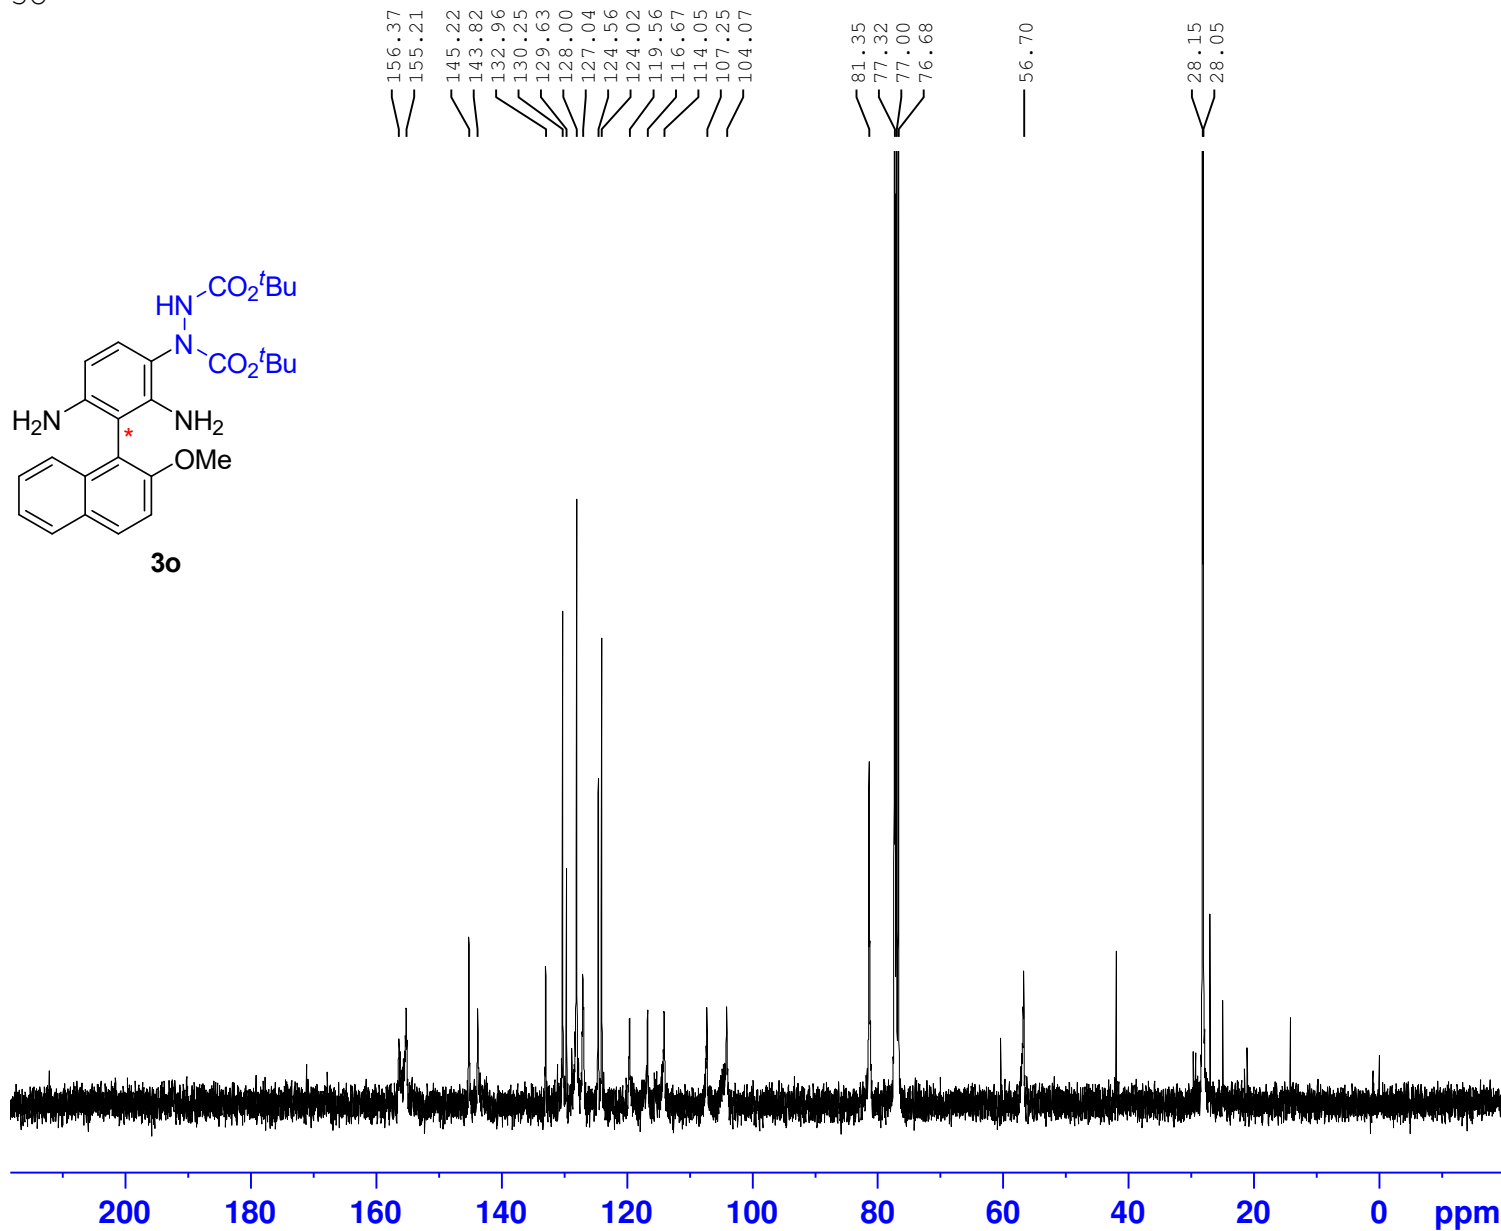

156.37  
155.21  
145.22  
143.82  
132.96  
130.25  
129.63  
128.00  
127.04  
124.56  
124.02  
119.56  
116.67  
114.05  
107.25  
104.07  
81.35  
77.32  
77.00  
76.68  
56.70  
28.15  
28.05



Current Data Parameters  
NAME 20231207-400M  
EXPNO 30  
PROCNO 1

F2 - Acquisition Parameters  
Date\_ 20231207  
Time 1.16  
INSTRUM spect  
PROBHD 5 mm PADUL 13C  
PULPROG zgpg30  
TD 65536  
SOLVENT CDC13  
NS 1024  
DS 4  
SWH 24038.461 Hz  
FIDRES 0.366798 Hz  
AQ 1.3631488 sec  
RG 37.77  
DW 20.800 usec  
DE 6.50 usec  
TE 293.9 K  
D1 2.00000000 sec  
D11 0.03000000 sec  
TD0 1

===== CHANNEL f1 =====  
NUC1 13C  
P1 9.80 usec  
PLW1 47.40000153 W  
SFO1 100.6379178 MHz

===== CHANNEL f2 =====  
CPDPRG[2] waltz16  
NUC2 1H  
PCPD2 90.00 usec  
PLW2 23.00000000 W  
PLW12 0.30712000 W  
PLW13 0.24877000 W  
SFO2 400.1916008 MHz

F2 - Processing parameters  
SI 32768  
SF 100.6278668 MHz  
WDW EM  
SSB 0  
LB 1.00 Hz  
GB 0  
PC 1.40

5a

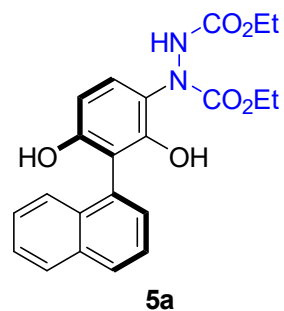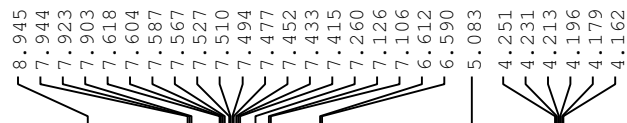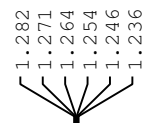

Current Data Parameters  
 NAME 20240103-400  
 EXPNO 23  
 PROCNO 1

F2 - Acquisition Parameters  
 Date\_ 20240103  
 Time 1.17  
 INSTRUM spect  
 PROBHD 5 mm PADUL 13C  
 PULPROG zg30  
 TD 65536  
 SOLVENT CDC13  
 NS 8  
 DS 2  
 SWH 8223.685 Hz  
 FIDRES 0.125483 Hz  
 AQ 3.9845889 sec  
 RG 68.24  
 DW 60.800 usec  
 DE 6.50 usec  
 TE 292.6 K  
 D1 1.00000000 sec  
 TD0 1

==== CHANNEL f1 =====  
 NUC1 1H  
 P1 9.90 usec  
 PLW1 23.00000000 W  
 SFO1 400.1924713 MHz

F2 - Processing parameters  
 SI 65536  
 SF 400.1900138 MHz  
 WDW EM  
 SSB 0  
 LB 0.30 Hz  
 GB 0  
 PC 1.00

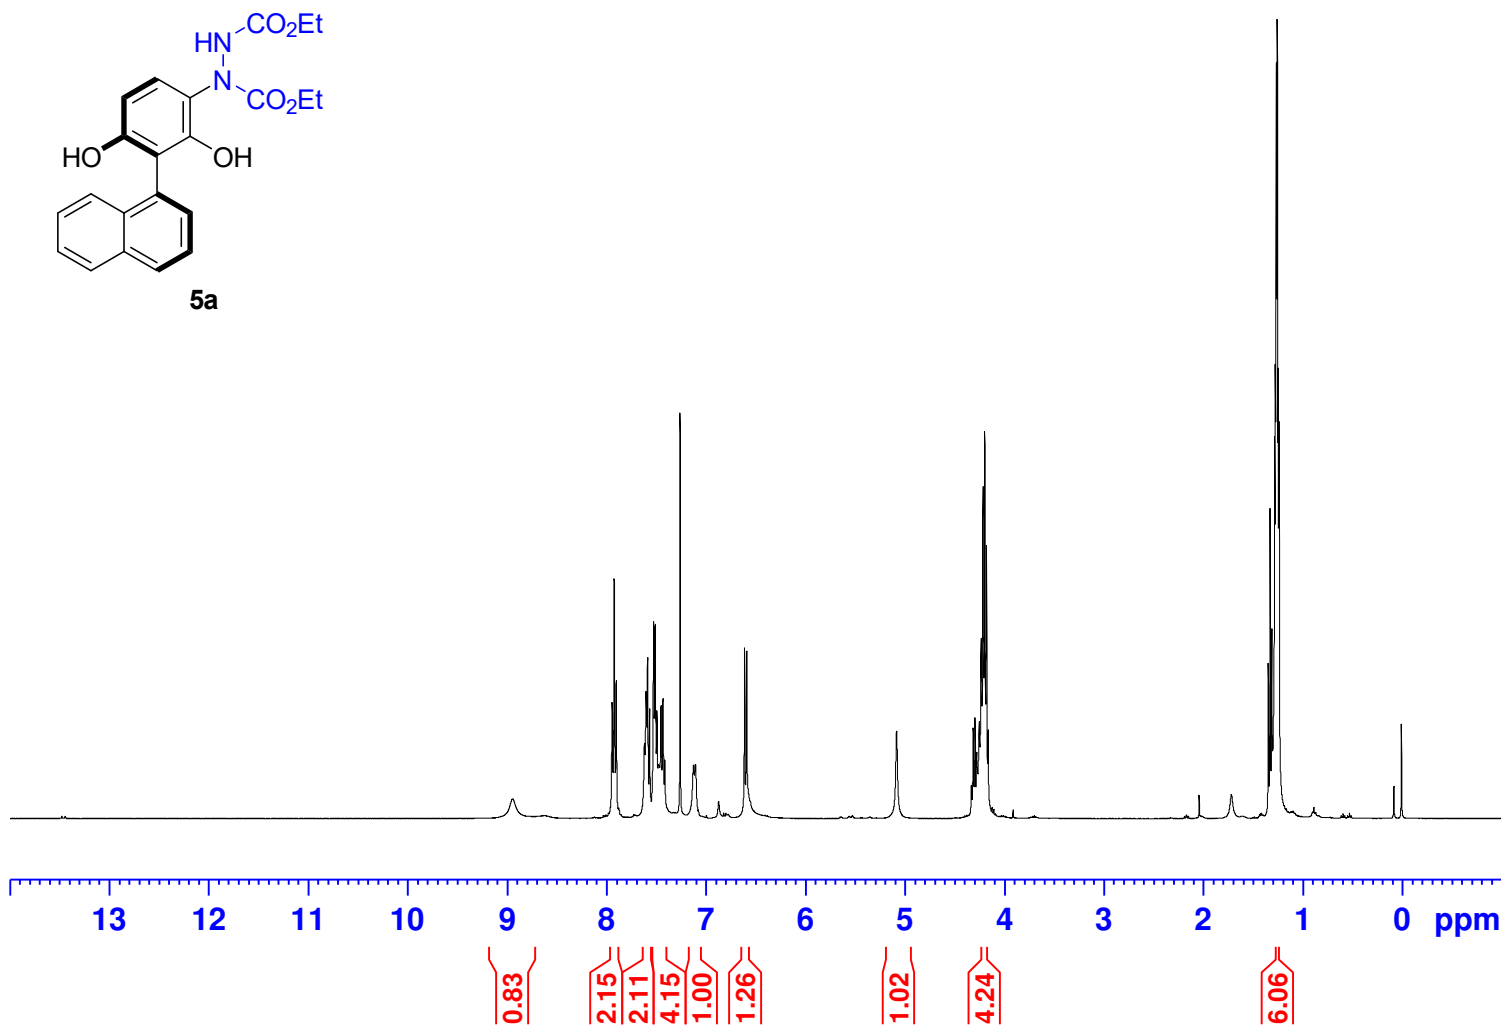

5a

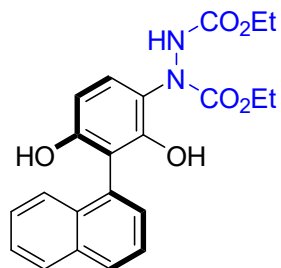

5a

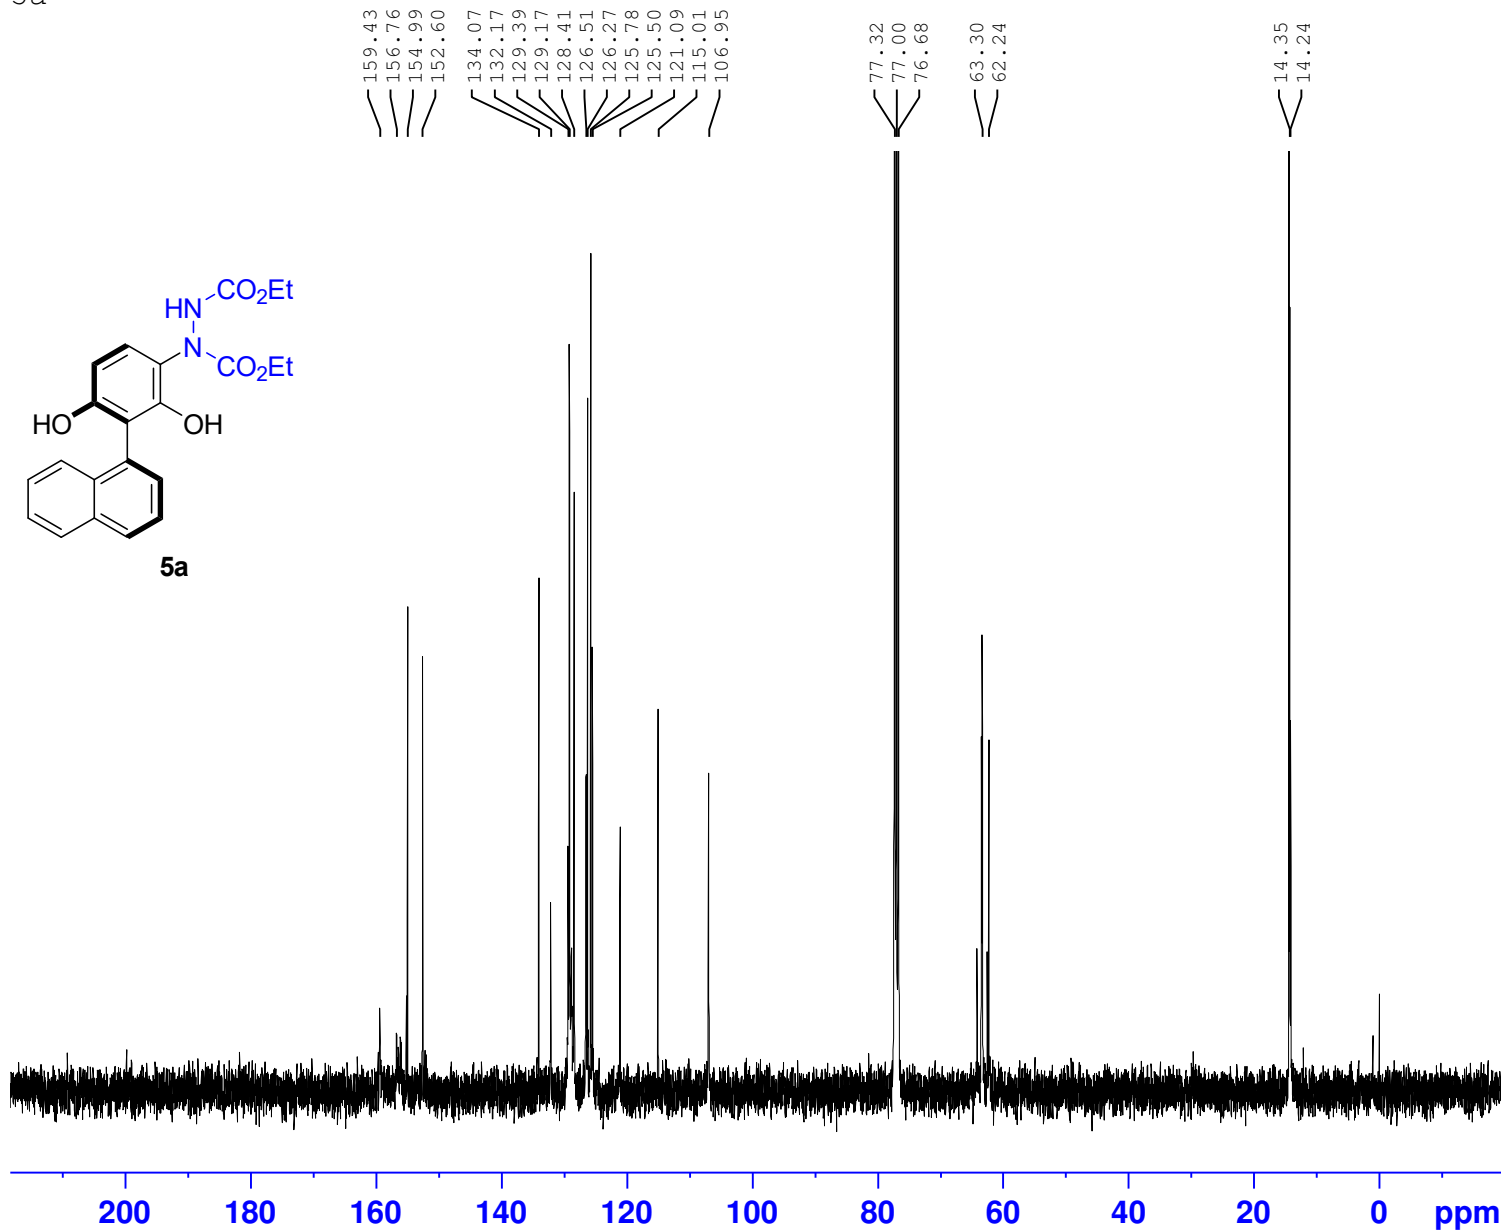

159.43  
156.76  
154.99  
152.60  
134.07  
132.17  
129.39  
129.17  
128.41  
126.51  
126.27  
125.78  
125.50  
121.09  
115.01  
106.95  
77.32  
77.00  
76.68  
63.30  
62.24  
14.35  
14.24



Current Data Parameters  
NAME 20240103-400  
EXPNO 24  
PROCNO 1

F2 - Acquisition Parameters  
Date\_ 20240103  
Time 2.17  
INSTRUM spect  
PROBHD 5 mm PADUL 13C  
PULPROG zgpg30  
TD 65536  
SOLVENT CDC13  
NS 1024  
DS 4  
SWH 24038.461 Hz  
FIDRES 0.366798 Hz  
AQ 1.3631488 sec  
RG 44.2  
DW 20.800 usec  
DE 6.50 usec  
TE 293.3 K  
D1 2.00000000 sec  
D11 0.03000000 sec  
TD0 1

==== CHANNEL f1 =====  
NUC1 13C  
P1 9.80 usec  
PLW1 47.40000153 W  
SFO1 100.6379178 MHz

==== CHANNEL f2 =====  
CPDPRG[2] waltz16  
NUC2 1H  
PCPD2 90.00 usec  
PLW2 23.00000000 W  
PLW12 0.30712000 W  
PLW13 0.24877000 W  
SFO2 400.1916008 MHz

F2 - Processing parameters  
SI 32768  
SF 100.6278649 MHz  
WDW EM  
SSB 0  
LB 1.00 Hz  
GB 0  
PC 1.40

5b

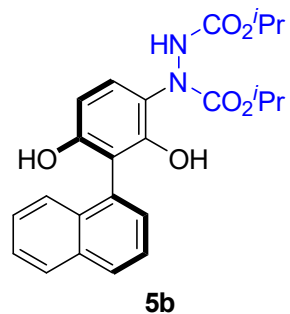

9.061  
7.947  
7.925  
7.903  
7.609  
7.591  
7.571  
7.528  
7.511  
7.493  
7.439  
7.421  
7.404  
7.260  
7.241  
7.106  
7.089  
6.611  
6.590  
6.416  
5.017  
5.001  
4.985  
4.970  
4.954  
4.939

1.269  
1.253

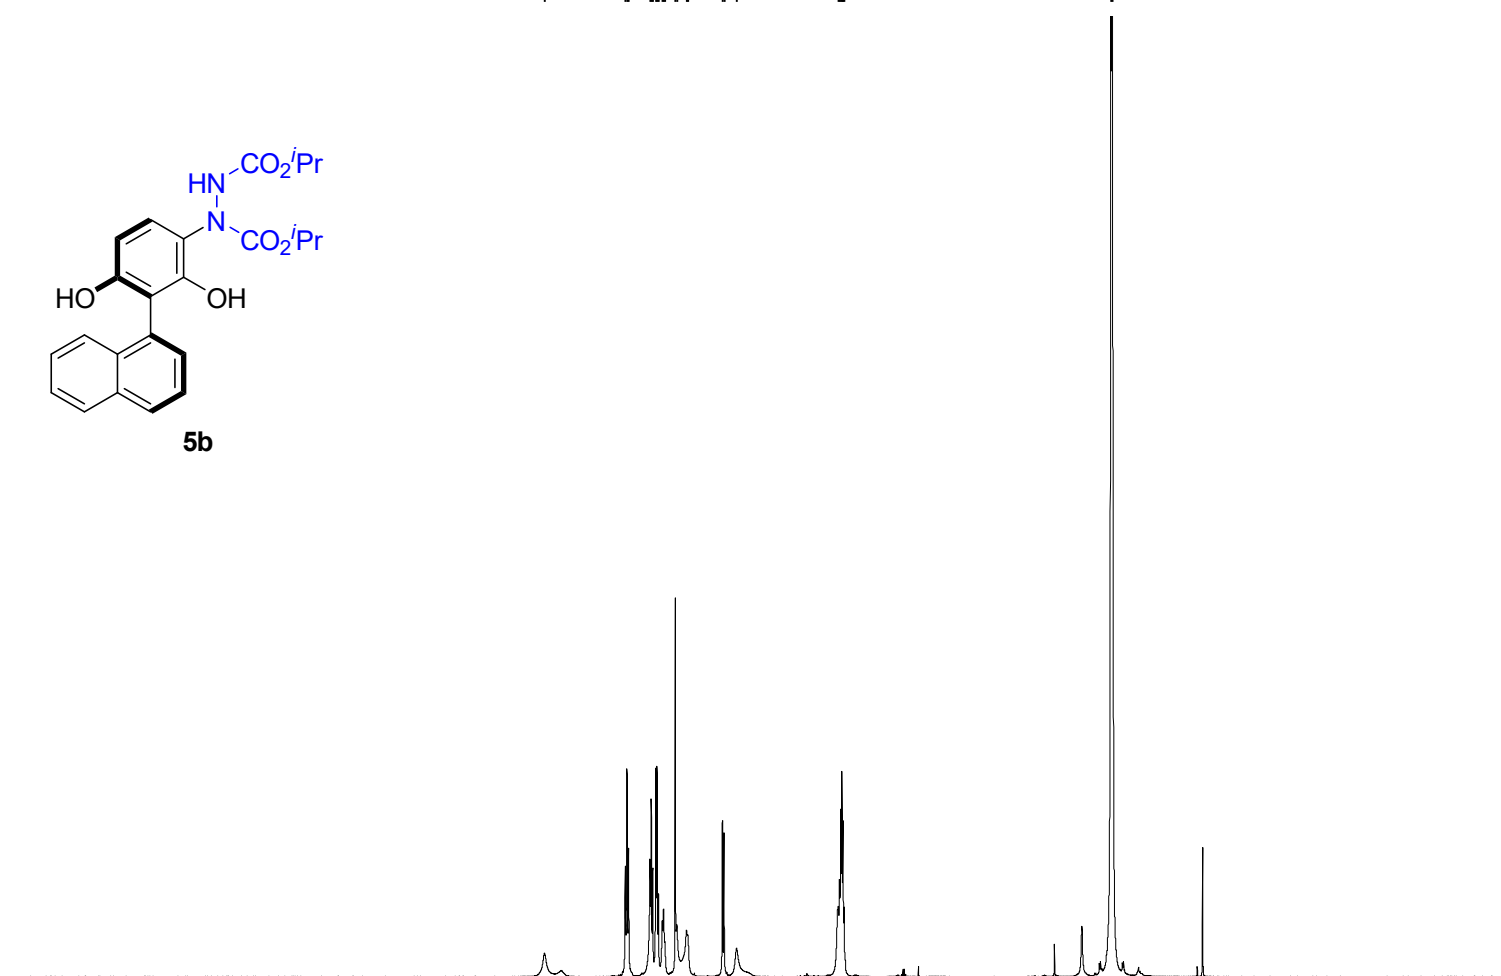

0.70  
2.05  
1.90  
2.05  
0.99  
1.85  
1.00  
0.80  
2.15  
12.14



Current Data Parameters  
NAME 20240103-400  
EXPNO 19  
PROCNO 1

F2 - Acquisition Parameters  
Date\_ 20240102  
Time 23.09  
INSTRUM spect  
PROBHD 5 mm PADUL 13C  
PULPROG zg30  
TD 65536  
SOLVENT CDC13  
NS 8  
DS 2  
SWH 8223.685 Hz  
FIDRES 0.125483 Hz  
AQ 3.9845889 sec  
RG 90.23  
DW 60.800 usec  
DE 6.50 usec  
TE 292.3 K  
D1 1.00000000 sec  
TD0 1

==== CHANNEL f1 =====  
NUC1 1H  
P1 9.90 usec  
PLW1 23.00000000 W  
SFO1 400.1924713 MHz

F2 - Processing parameters  
SI 65536  
SF 400.1900139 MHz  
WDW EM  
SSB 0  
LB 0.30 Hz  
GB 0  
PC 1.00



5b

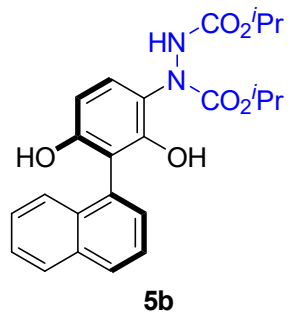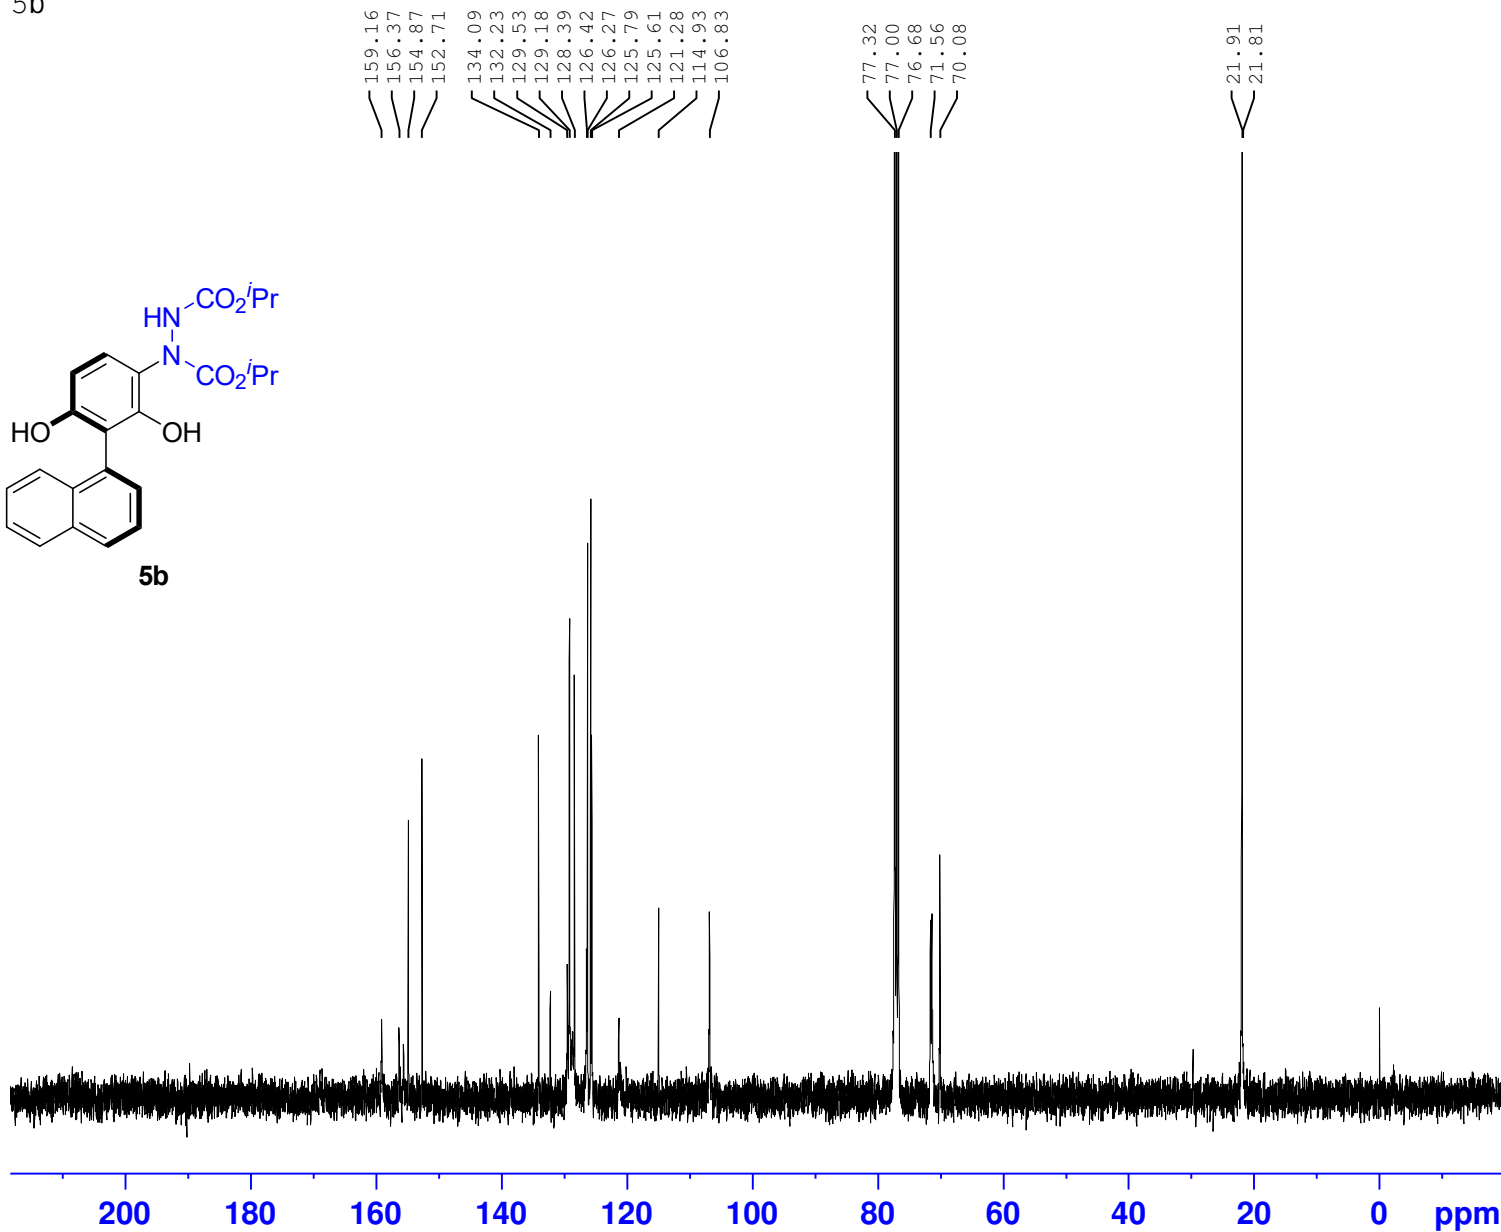

Current Data Parameters  
NAME 20240103-400  
EXPNO 20  
PROCNO 1

F2 - Acquisition Parameters  
Date\_ 20240103  
Time 0.09  
INSTRUM spect  
PROBHD 5 mm PADUL 13C  
PULPROG zgpg30  
TD 65536  
SOLVENT CDC13  
NS 1024  
DS 4  
SWH 24038.461 Hz  
FIDRES 0.366798 Hz  
AQ 1.3631488 sec  
RG 61.19  
DW 20.800 usec  
DE 6.50 usec  
TE 293.1 K  
D1 2.00000000 sec  
D11 0.03000000 sec  
TD0 1

==== CHANNEL f1 =====  
NUC1 13C  
P1 9.80 usec  
PLW1 47.40000153 W  
SFO1 100.6379178 MHz

==== CHANNEL f2 =====  
CPDPRG[2] waltz16  
NUC2 1H  
PCPD2 90.00 usec  
PLW2 23.00000000 W  
PLW12 0.30712000 W  
PLW13 0.24877000 W  
SFO2 400.1916008 MHz

F2 - Processing parameters  
SI 32768  
SF 100.6278634 MHz  
WDW EM  
SSB 0  
LB 1.00 Hz  
GB 0  
PC 1.40

5d

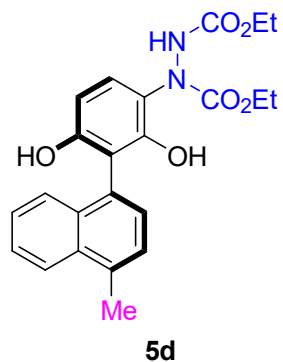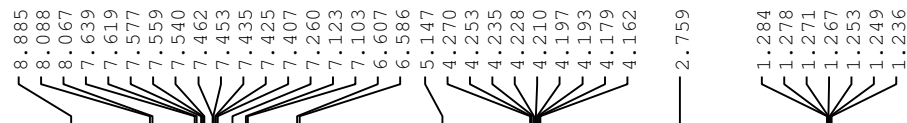

Current Data Parameters  
NAME 20240306-400  
EXPNO 13  
PROCNO 1

F2 - Acquisition Parameters  
Date\_ 20240305  
Time 23.20  
INSTRUM spect  
PROBHD 5 mm PADUL 13C  
PULPROG zg30  
TD 65536  
SOLVENT CDC13  
NS 6  
DS 2  
SWH 8223.685 Hz  
FIDRES 0.125483 Hz  
AQ 3.9845889 sec  
RG 53.3  
DW 60.800 usec  
DE 6.50 usec  
TE 294.4 K  
D1 1.00000000 sec  
TD0 1

==== CHANNEL f1 =====  
NUC1 1H  
P1 9.90 usec  
PLW1 23.00000000 W  
SFO1 400.1924713 MHz

F2 - Processing parameters  
SI 65536  
SF 400.1900138 MHz  
WDW EM  
SSB 0  
LB 0.30 Hz  
GB 0  
PC 1.00

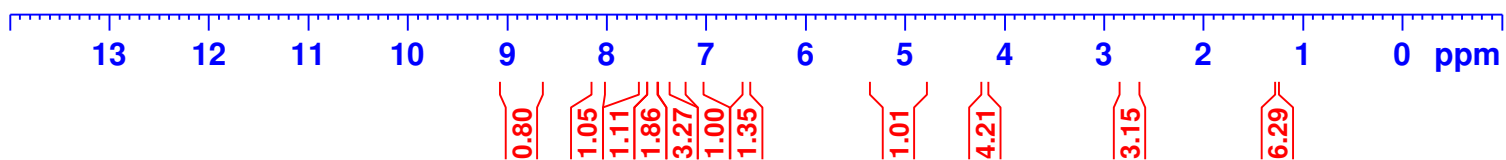

5d

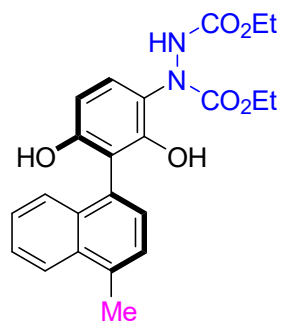

5d

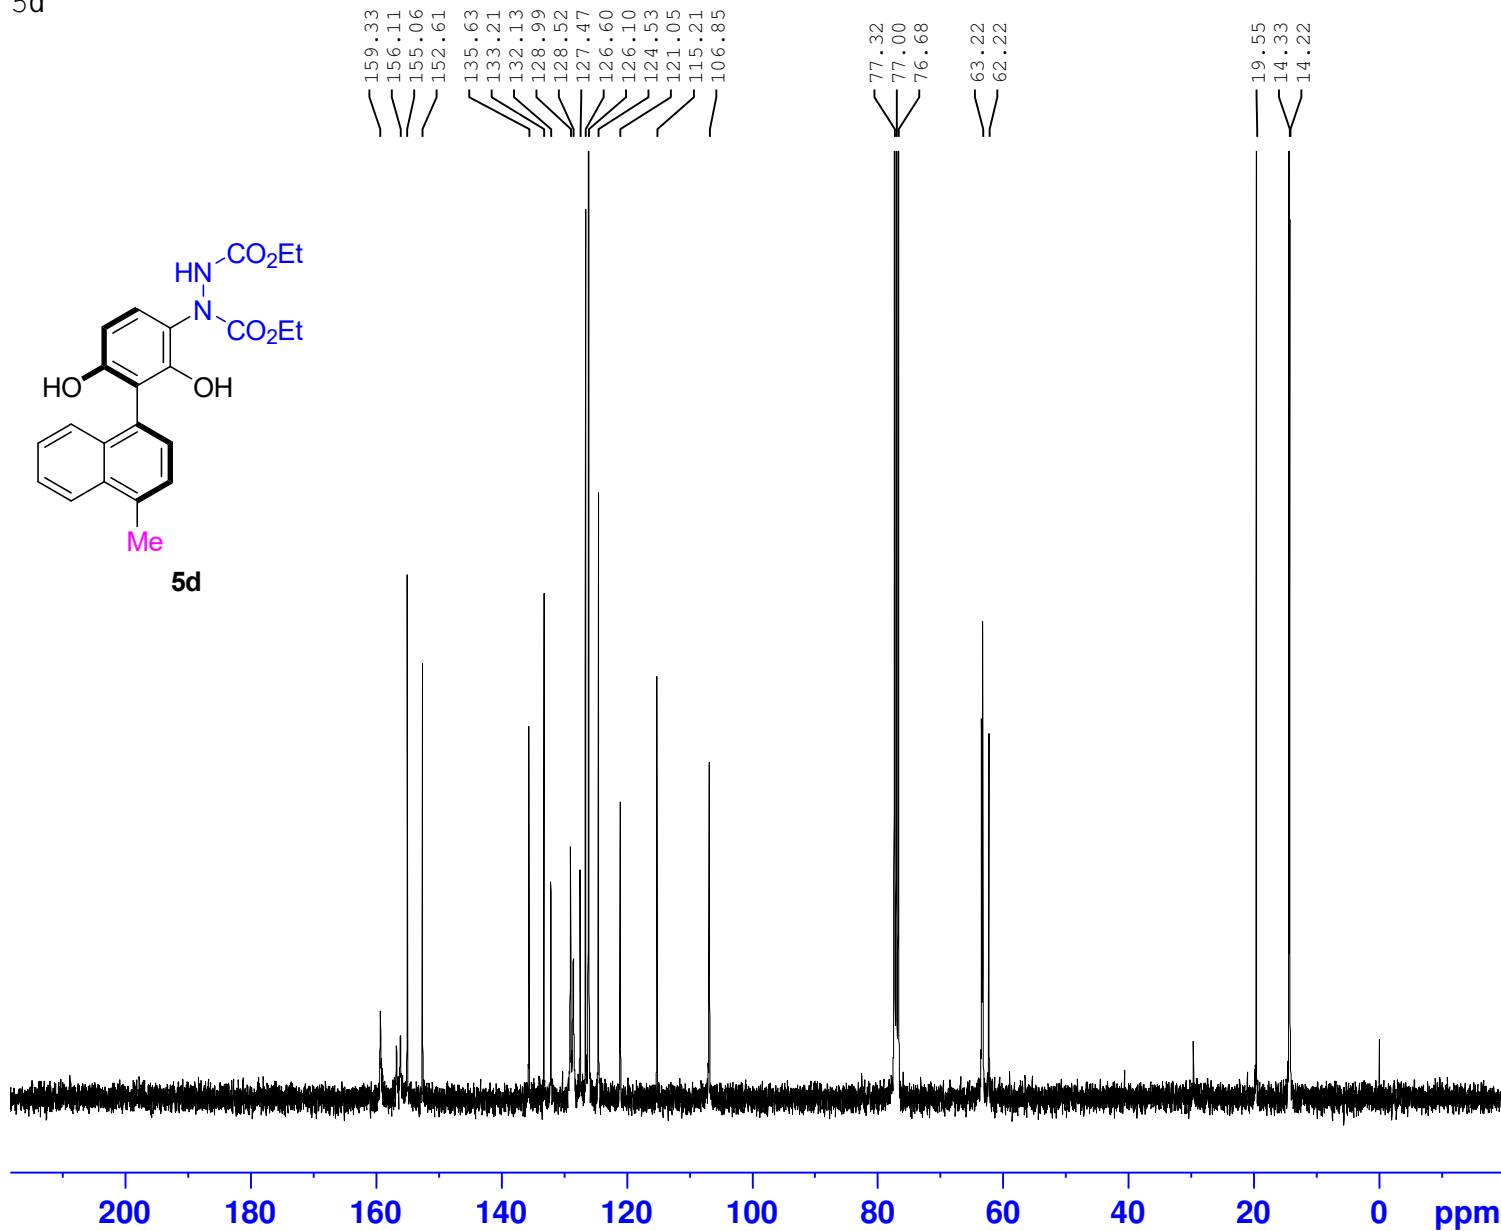

Current Data Parameters  
 NAME 20240306-400  
 EXPNO 14  
 PROCNO 1

F2 - Acquisition Parameters  
 Date\_ 20240306  
 Time 0.20  
 INSTRUM spect  
 PROBHD 5 mm PADUL 13C  
 PULPROG zgpg30  
 TD 65536  
 SOLVENT CDC13  
 NS 1024  
 DS 4  
 SWH 24038.461 Hz  
 FIDRES 0.366798 Hz  
 AQ 1.3631488 sec  
 RG 61.19  
 DW 20.800 usec  
 DE 6.50 usec  
 TE 294.6 K  
 D1 2.00000000 sec  
 D11 0.03000000 sec  
 TD0 1

==== CHANNEL f1 =====  
 NUC1 13C  
 P1 9.80 usec  
 PLW1 47.40000153 W  
 SFO1 100.6379178 MHz

==== CHANNEL f2 =====  
 CPDPRG[2] waltz16  
 NUC2 1H  
 PCPD2 90.00 usec  
 PLW2 23.00000000 W  
 PLW12 0.30712000 W  
 PLW13 0.24877000 W  
 SFO2 400.1916008 MHz

F2 - Processing parameters  
 SI 32768  
 SF 100.6278670 MHz  
 WDW EM  
 SSB 0  
 LB 1.00 Hz  
 GB 0  
 PC 1.40

5e

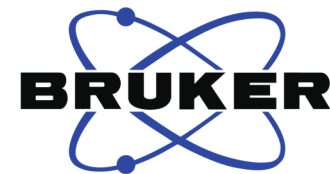

Current Data Parameters  
 NAME 20240203-400  
 EXPNO 265  
 PROCNO 1

F2 - Acquisition Parameters  
 Date\_ 20240202  
 Time 22.24  
 INSTRUM spect  
 PROBHD 5 mm PADUL 13C  
 PULPROG zg30  
 TD 65536  
 SOLVENT CDC13  
 NS 8  
 DS 2  
 SWH 8223.685 Hz  
 FIDRES 0.125483 Hz  
 AQ 3.9845889 sec  
 RG 53.3  
 DW 60.800 usec  
 DE 6.50 usec  
 TE 289.5 K  
 D1 1.00000000 sec  
 TD0 1

==== CHANNEL f1 =====  
 NUC1 1H  
 P1 9.90 usec  
 PLW1 23.00000000 W  
 SFO1 400.1924713 MHz

F2 - Processing parameters  
 SI 65536  
 SF 400.1900136 MHz  
 WDW EM  
 SSB 0  
 LB 0.30 Hz  
 GB 0  
 PC 1.00

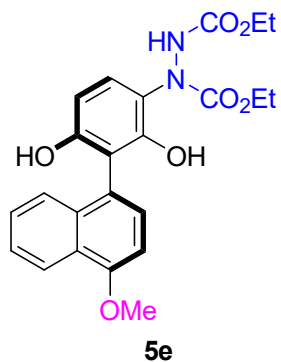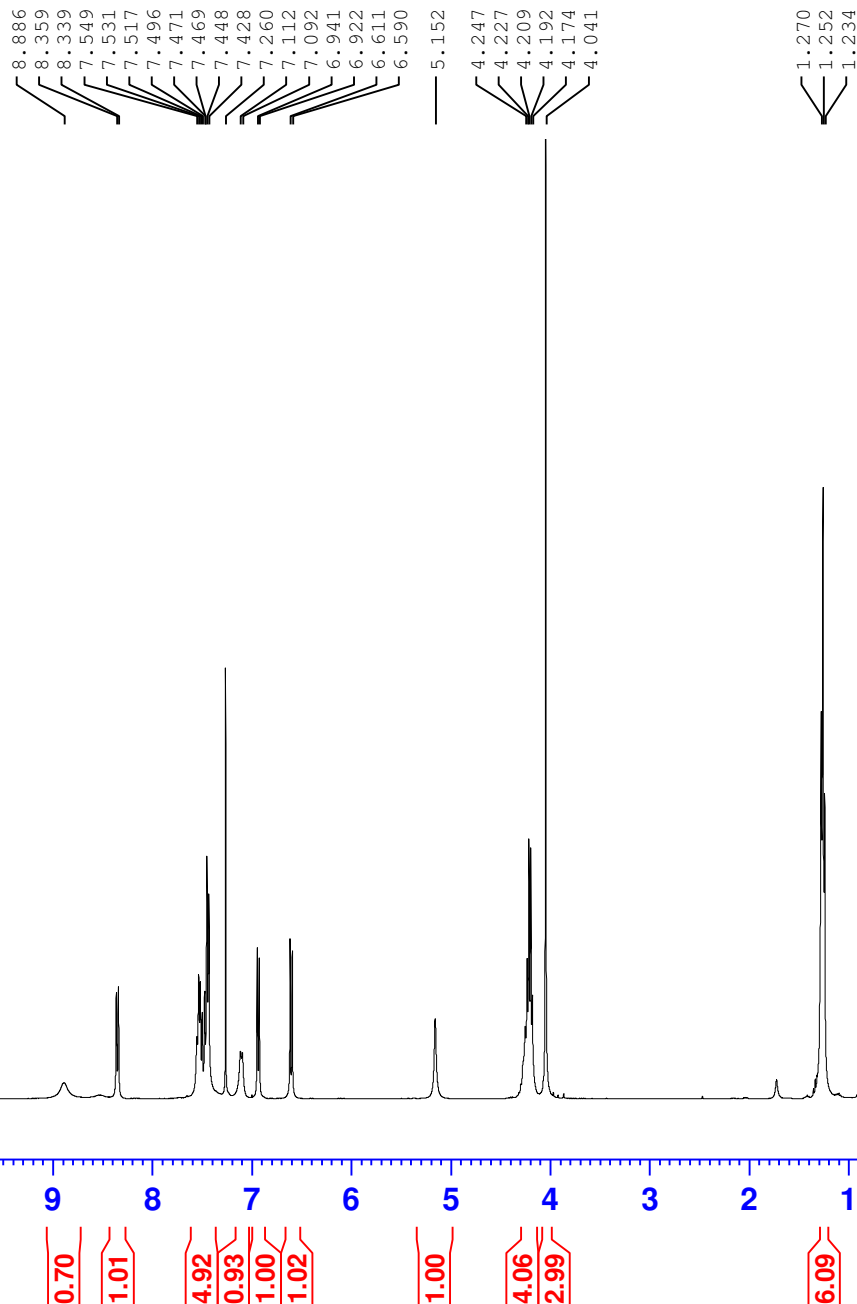

5e

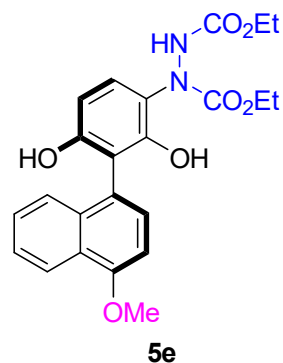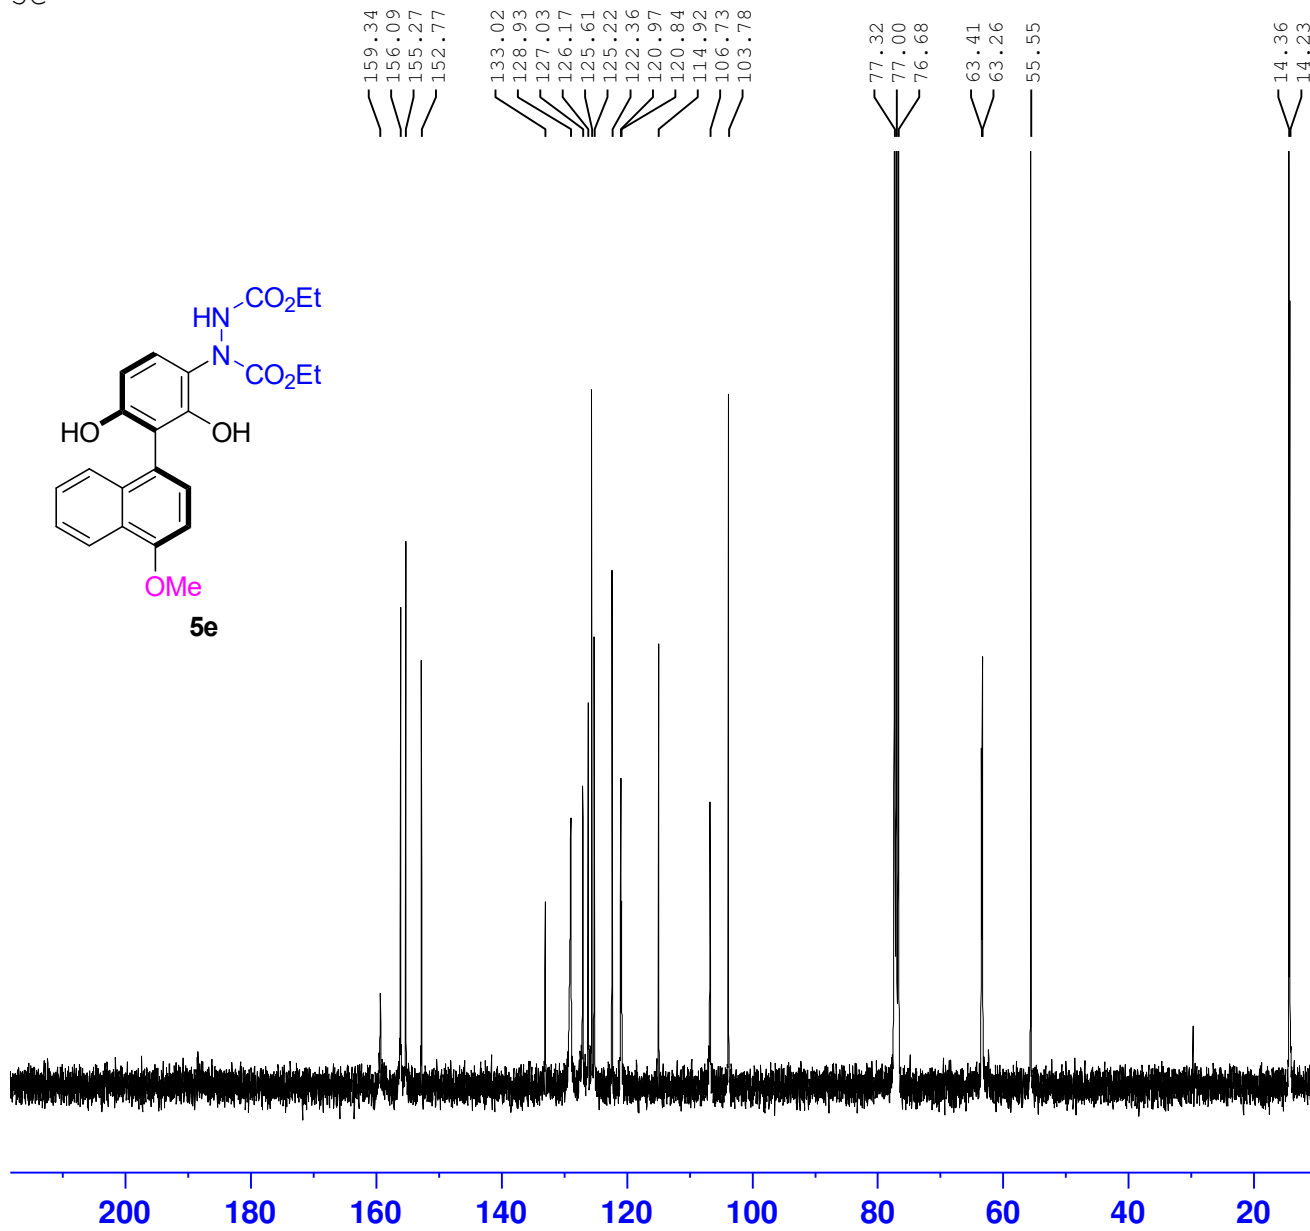

Current Data Parameters  
NAME 20240203-400  
EXPNO 21  
PROCNO 1

F2 - Acquisition Parameters  
Date\_ 20240202  
Time 23.24  
INSTRUM spect  
PROBHD 5 mm PADUL 13C  
PULPROG zgpg30  
TD 65536  
SOLVENT CDC13  
NS 1024  
DS 4  
SWH 24038.461 Hz  
FIDRES 0.366798 Hz  
AQ 1.3631488 sec  
RG 35.06  
DW 20.800 usec  
DE 6.50 usec  
TE 290.1 K  
D1 2.00000000 sec  
D11 0.03000000 sec  
TD0 1

==== CHANNEL f1 =====  
NUC1 13C  
P1 9.80 usec  
PLW1 47.40000153 W  
SFO1 100.6379178 MHz

==== CHANNEL f2 =====  
CPDPRG[2] waltz16  
NUC2 1H  
PCPD2 90.00 usec  
PLW2 23.00000000 W  
PLW12 0.30712000 W  
PLW13 0.24877000 W  
SFO2 400.1916008 MHz

F2 - Processing parameters  
SI 32768  
SF 100.6278669 MHz  
WDW EM  
SSB 0  
LB 1.00 Hz  
GB 0  
PC 1.40

5f

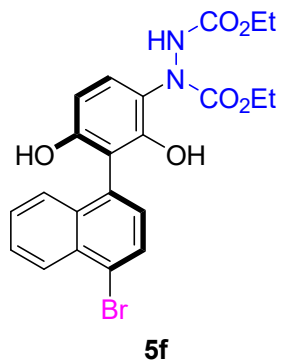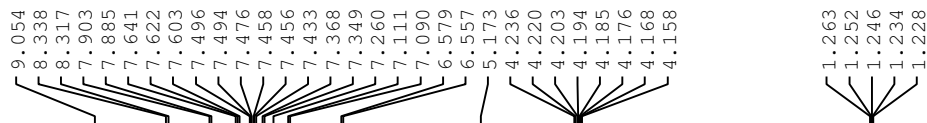

Current Data Parameters  
NAME 20240119-400  
EXPNO 12  
PROCNO 1

F2 - Acquisition Parameters  
Date\_ 20240119  
Time 2.37  
INSTRUM spect  
PROBHD 5 mm PADUL 13C  
PULPROG zg30  
TD 65536  
SOLVENT CDC13  
NS 6  
DS 2  
SWH 8223.685 Hz  
FIDRES 0.125483 Hz  
AQ 3.9845889 sec  
RG 68.24  
DW 60.800 usec  
DE 6.50 usec  
TE 291.2 K  
D1 1.00000000 sec  
TD0 1

==== CHANNEL f1 =====  
NUC1 1H  
P1 9.90 usec  
PLW1 23.00000000 W  
SFO1 400.1924713 MHz

F2 - Processing parameters  
SI 65536  
SF 400.1900137 MHz  
WDW EM  
SSB 0  
LB 0.30 Hz  
GB 0  
PC 1.00

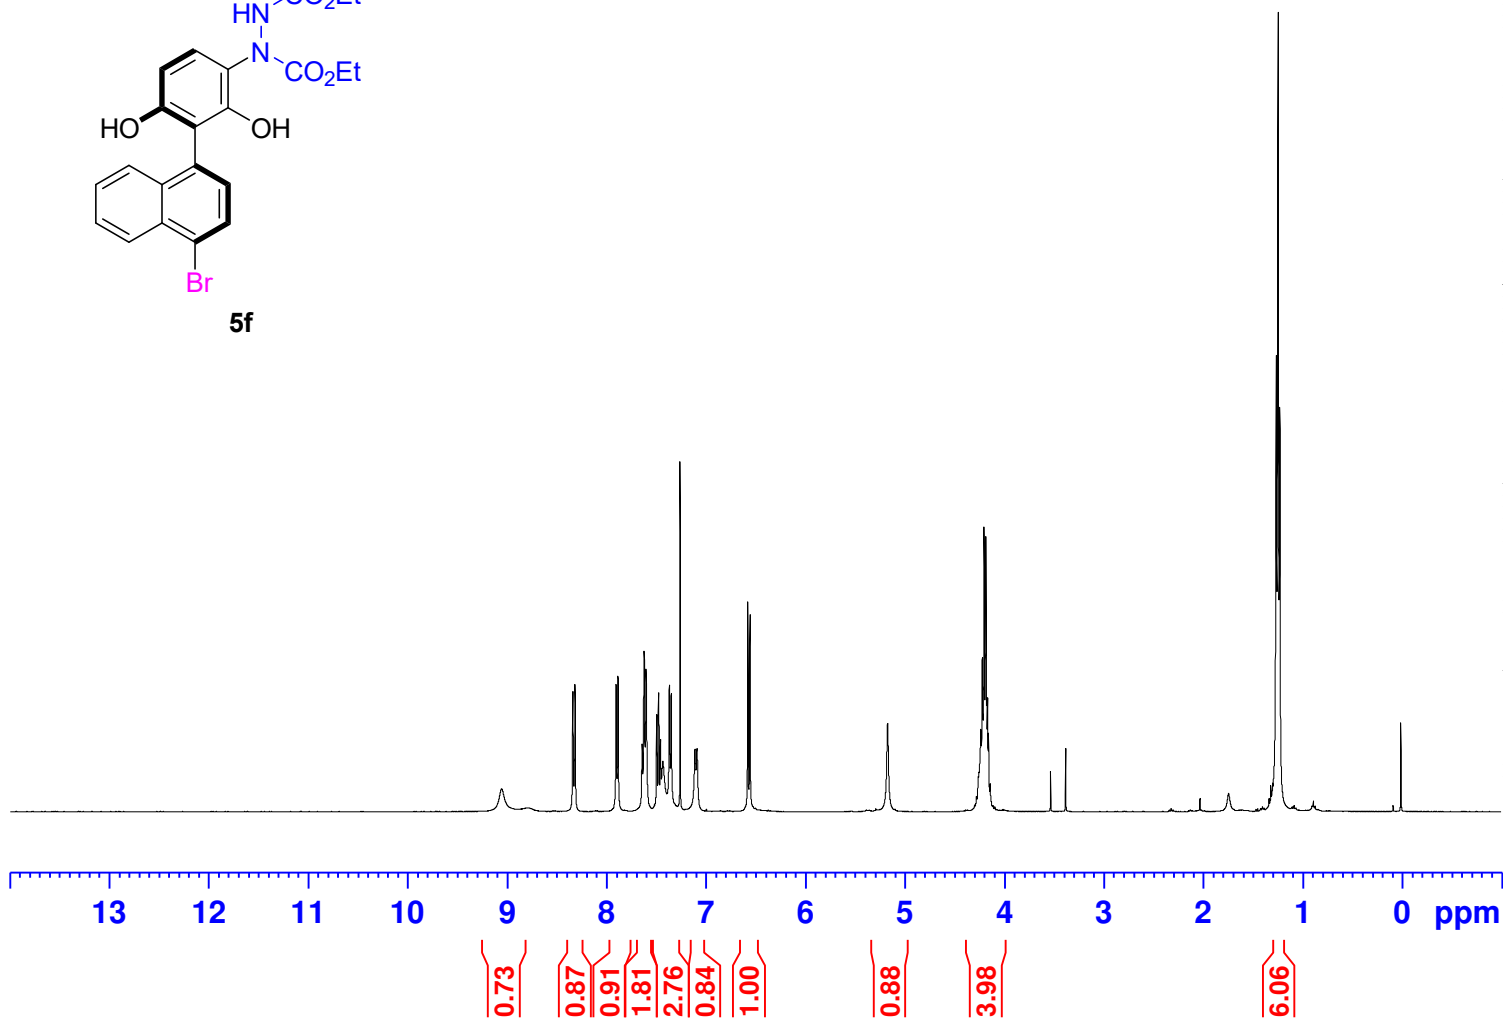

5f

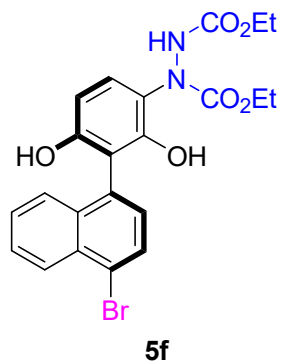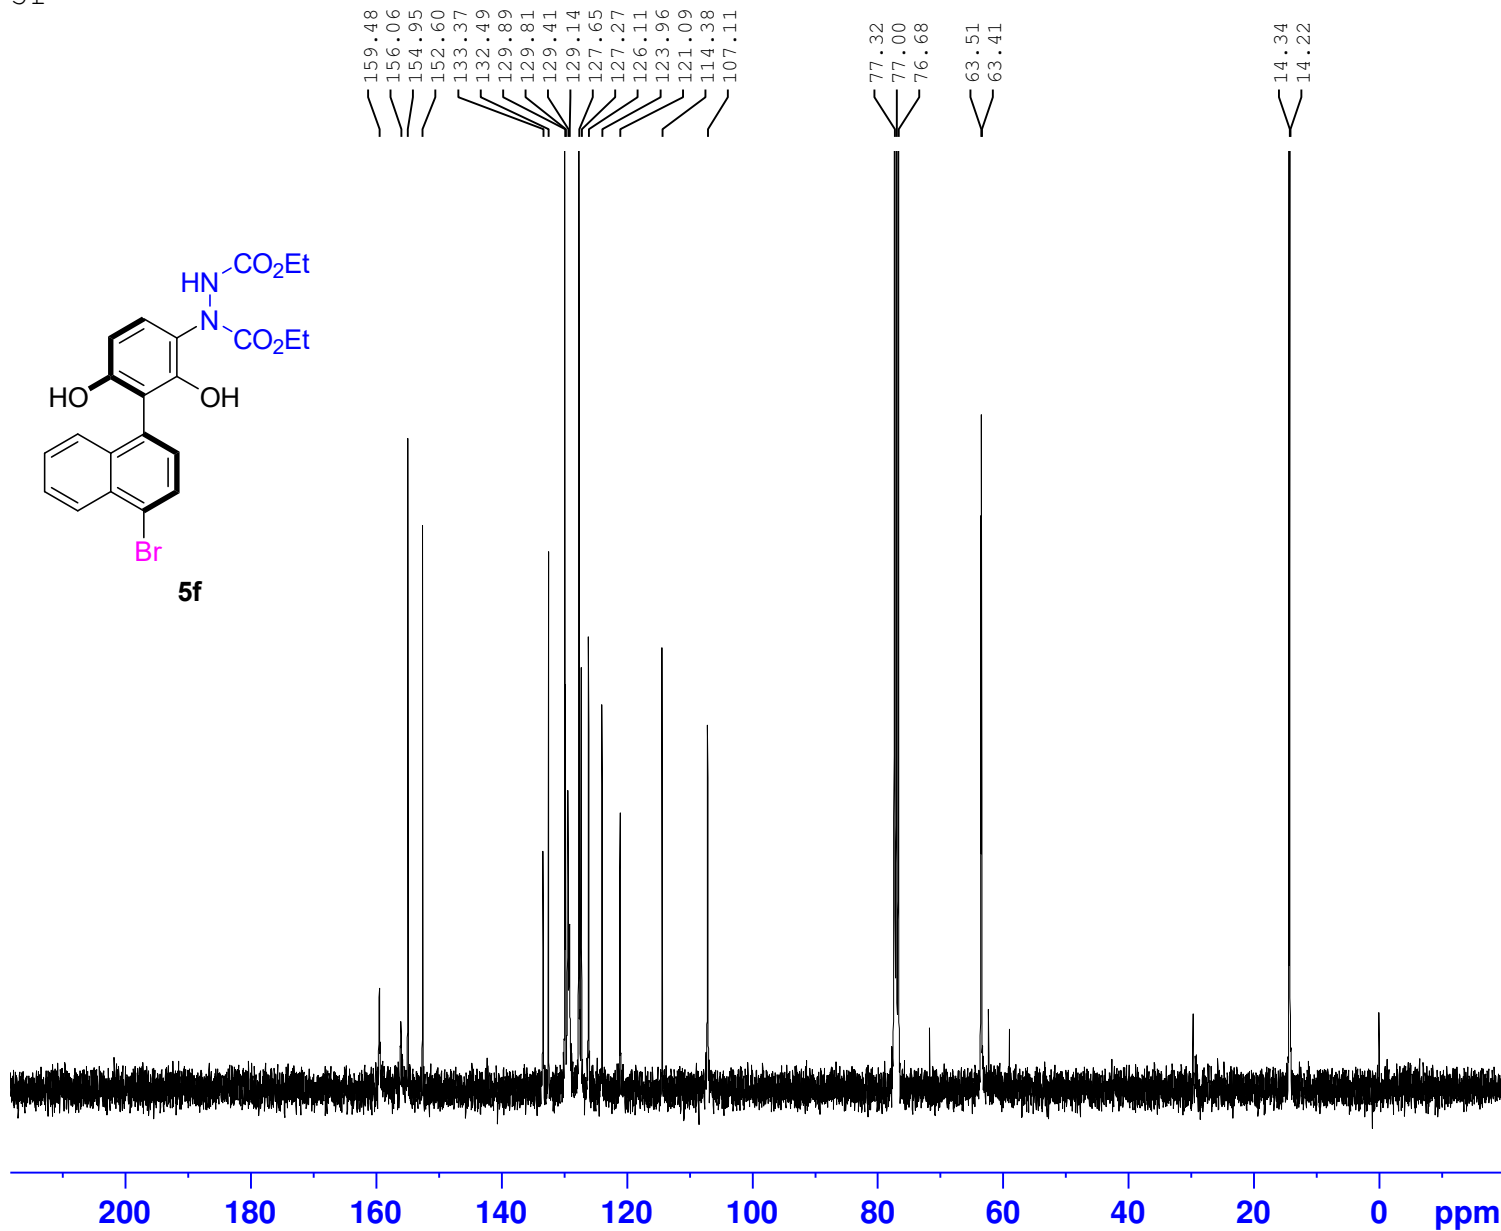

Current Data Parameters  
NAME 20240119-400  
EXPNO 13  
PROCNO 1

F2 - Acquisition Parameters  
Date\_ 20240119  
Time 3.37  
INSTRUM spect  
PROBHD 5 mm PADUL 13C  
PULPROG zgpg30  
TD 65536  
SOLVENT CDC13  
NS 1024  
DS 4  
SWH 24038.461 Hz  
FIDRES 0.366798 Hz  
AQ 1.3631488 sec  
RG 37.77  
DW 20.800 usec  
DE 6.50 usec  
TE 291.6 K  
D1 2.00000000 sec  
D11 0.03000000 sec  
TD0 1

=====  
CHANNEL f1  
NUC1 13C  
P1 9.80 usec  
PLW1 47.40000153 W  
SFO1 100.6379178 MHz

=====  
CHANNEL f2  
CPDPRG[2] waltz16  
NUC2 1H  
PCPD2 90.00 usec  
PLW2 23.00000000 W  
PLW12 0.30712000 W  
PLW13 0.24877000 W  
SFO2 400.1916008 MHz

F2 - Processing parameters  
SI 32768  
SF 100.6278661 MHz  
WDW EM  
SSB 0  
LB 1.00 Hz  
GB 0  
PC 1.40

5g

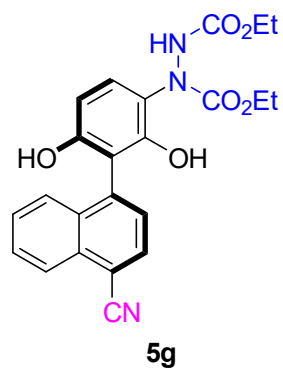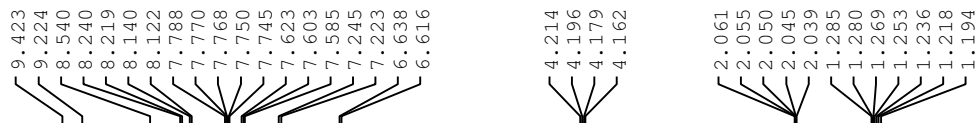

Current Data Parameters  
NAME 20240125-400  
EXPNO 20  
PROCNO 1

F2 - Acquisition Parameters  
Date\_ 20240125  
Time 2.40  
INSTRUM spect  
PROBHD 5 mm PADUL 13C  
PULPROG zg30  
TD 65536  
SOLVENT Acetone  
NS 8  
DS 2  
SWH 8223.685 Hz  
FIDRES 0.125483 Hz  
AQ 3.9845889 sec  
RG 75.43  
DW 60.800 usec  
DE 6.50 usec  
TE 289.1 K  
D1 1.00000000 sec  
TD0 1

==== CHANNEL f1 =====  
NUC1 1H  
P1 9.90 usec  
PLW1 23.00000000 W  
SFO1 400.1924713 MHz

F2 - Processing parameters  
SI 65536  
SF 400.1900109 MHz  
WDW EM  
SSB 0  
LB 0.30 Hz  
GB 0  
PC 1.00

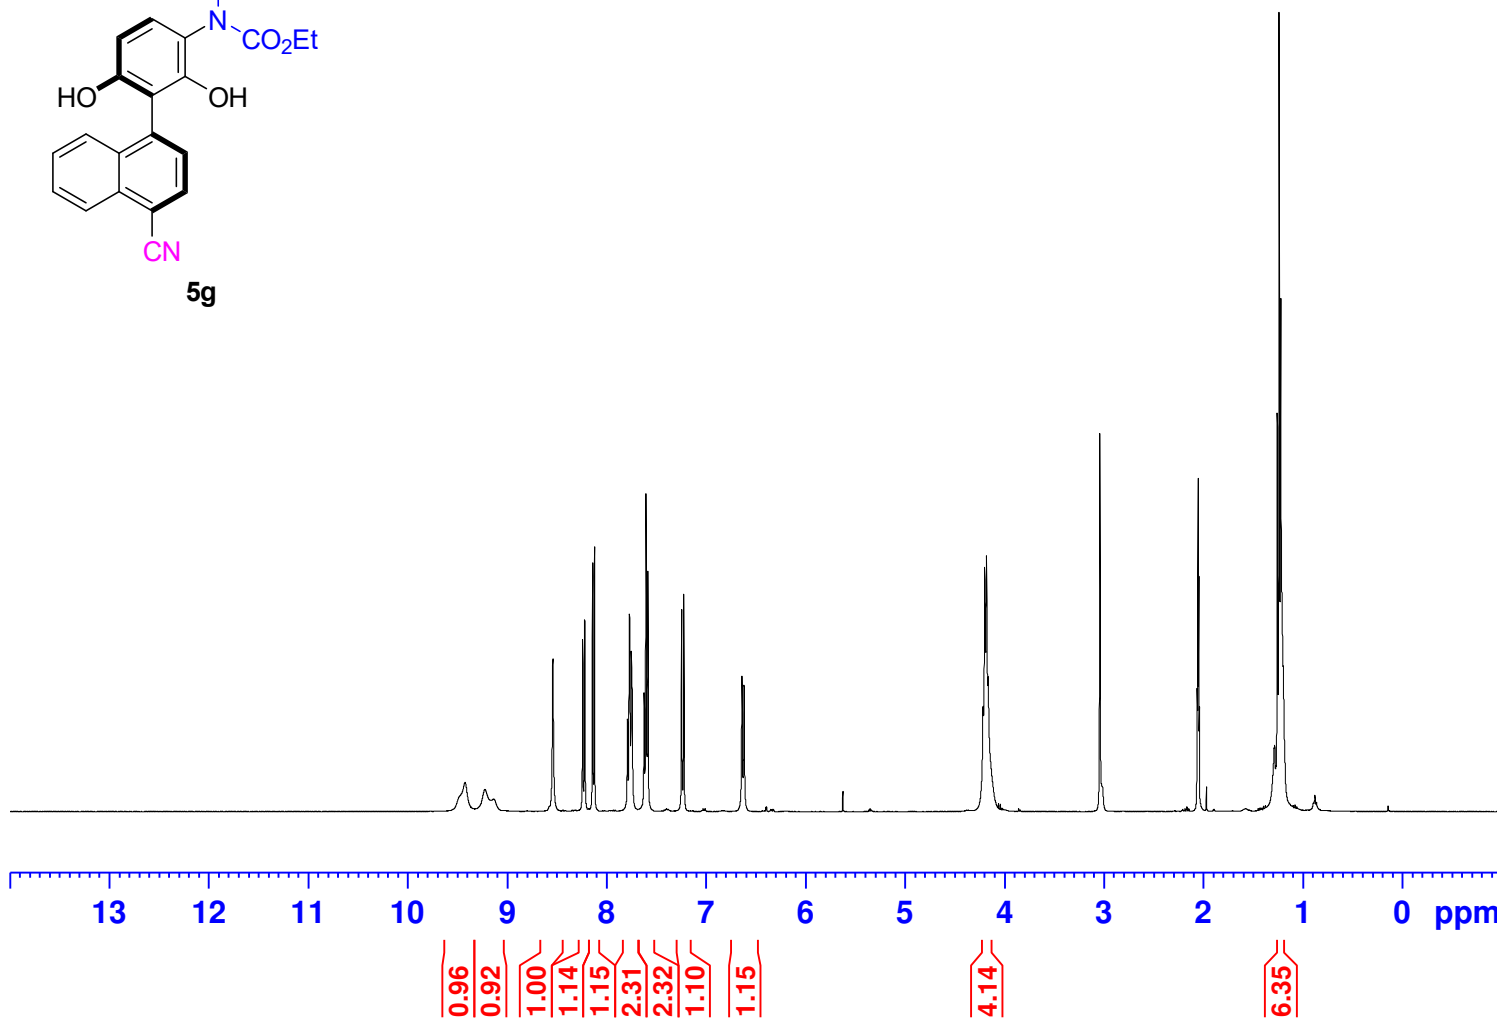



5g



Current Data Parameters  
 NAME 20240125-400  
 EXPNO 21  
 PROCNO 1

F2 - Acquisition Parameters  
 Date\_ 20240125  
 Time 3.40  
 INSTRUM spect  
 PROBHD 5 mm PADUL 13C  
 PULPROG zgpg30  
 TD 65536  
 SOLVENT Acetone  
 NS 1024  
 DS 4  
 SWH 24038.461 Hz  
 FIDRES 0.366798 Hz  
 AQ 1.3631488 sec  
 RG 28.08  
 DW 20.800 usec  
 DE 6.50 usec  
 TE 289.6 K  
 D1 2.00000000 sec  
 D11 0.03000000 sec  
 TD0 1

==== CHANNEL f1 =====  
 NUC1 13C  
 P1 9.80 usec  
 PLW1 47.40000153 W  
 SFO1 100.6379178 MHz

==== CHANNEL f2 =====  
 CPDPRG[2] waltz16  
 NUC2 1H  
 PCPD2 90.00 usec  
 PLW2 23.00000000 W  
 PLW12 0.30712000 W  
 PLW13 0.24877000 W  
 SFO2 400.1916008 MHz

F2 - Processing parameters  
 SI 32768  
 SF 100.6277815 MHz  
 WDW EM  
 SSB 0  
 LB 1.00 Hz  
 GB 0  
 PC 1.40

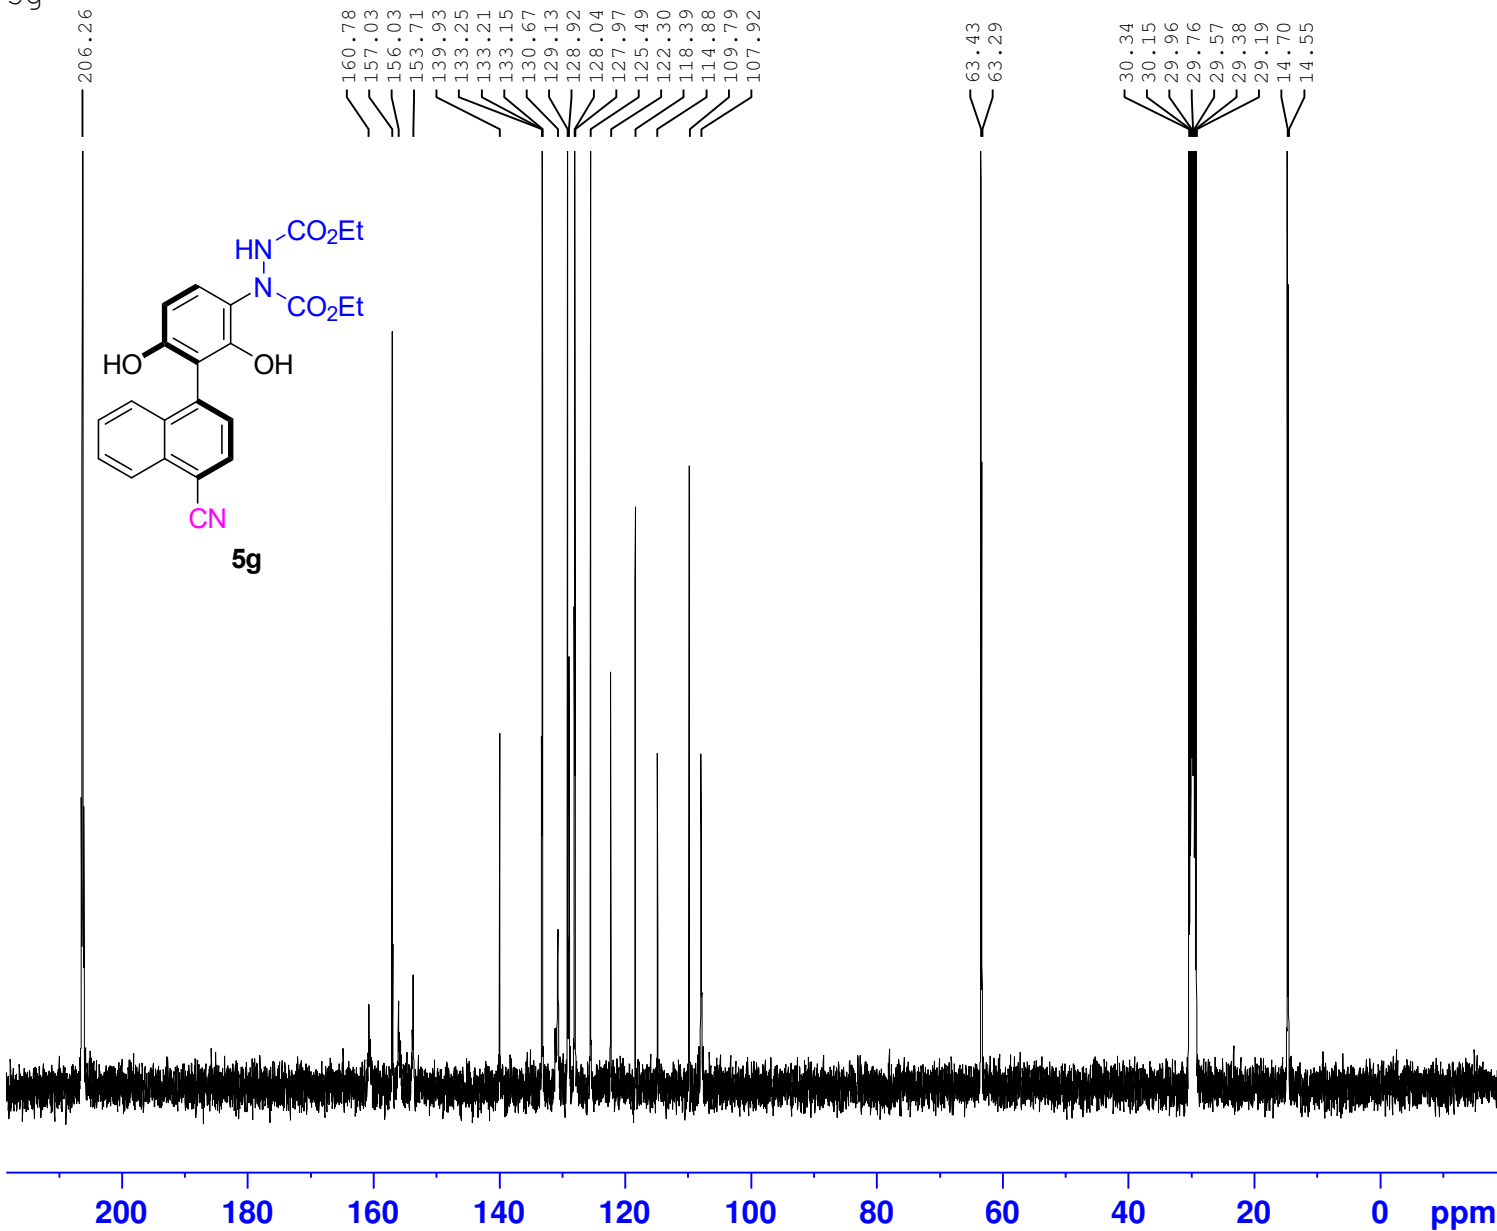

200 180 160 140 120 100 80 60 40 20 0 ppm

5h

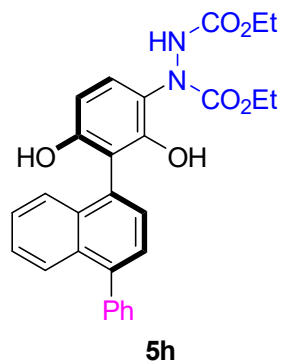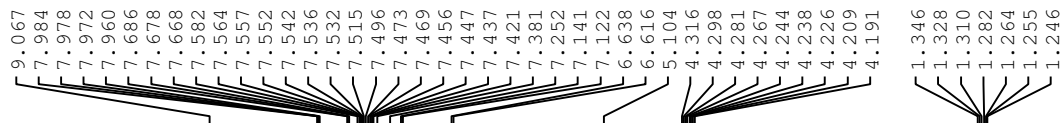

Current Data Parameters  
NAME 20240131  
EXPNO 20  
PROCNO 1

F2 - Acquisition Parameters  
Date\_ 20240131  
Time 1.02  
INSTRUM spect  
PROBHD 5 mm PADUL 13C  
PULPROG zg30  
TD 65536  
SOLVENT CDC13  
NS 8  
DS 2  
SWH 8223.685 Hz  
FIDRES 0.125483 Hz  
AQ 3.9845889 sec  
RG 90.23  
DW 60.800 usec  
DE 6.50 usec  
TE 290.2 K  
D1 1.00000000 sec  
TD0 1

==== CHANNEL f1 =====  
NUC1 1H  
P1 9.90 usec  
PLW1 23.00000000 W  
SFO1 400.1924713 MHz

F2 - Processing parameters  
SI 65536  
SF 400.1900170 MHz  
WDW EM  
SSB 0  
LB 0.30 Hz  
GB 0  
PC 1.00

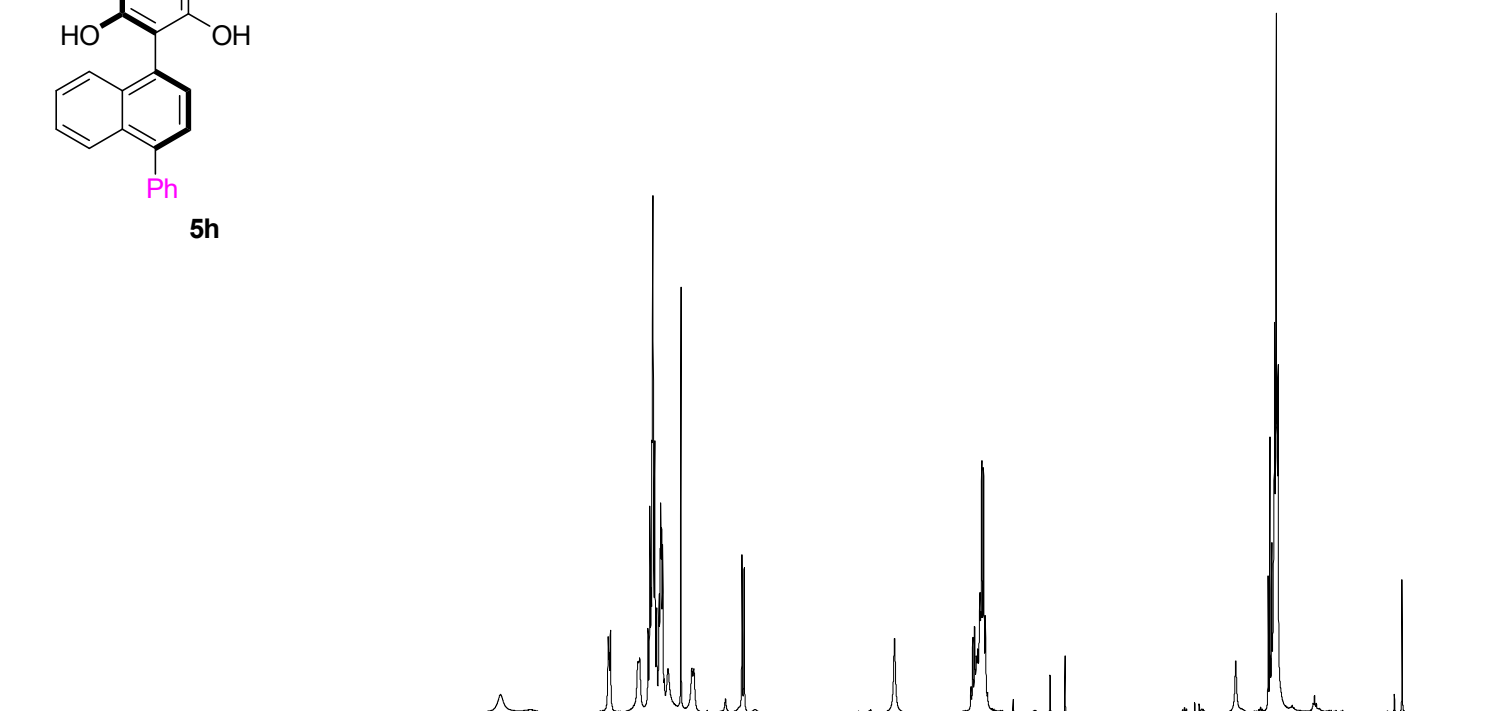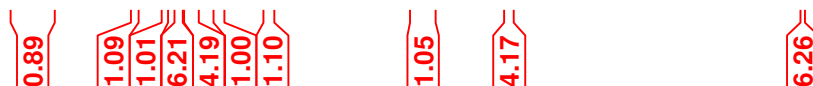

5h

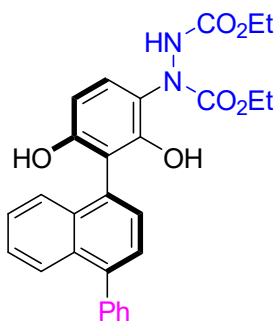

5h

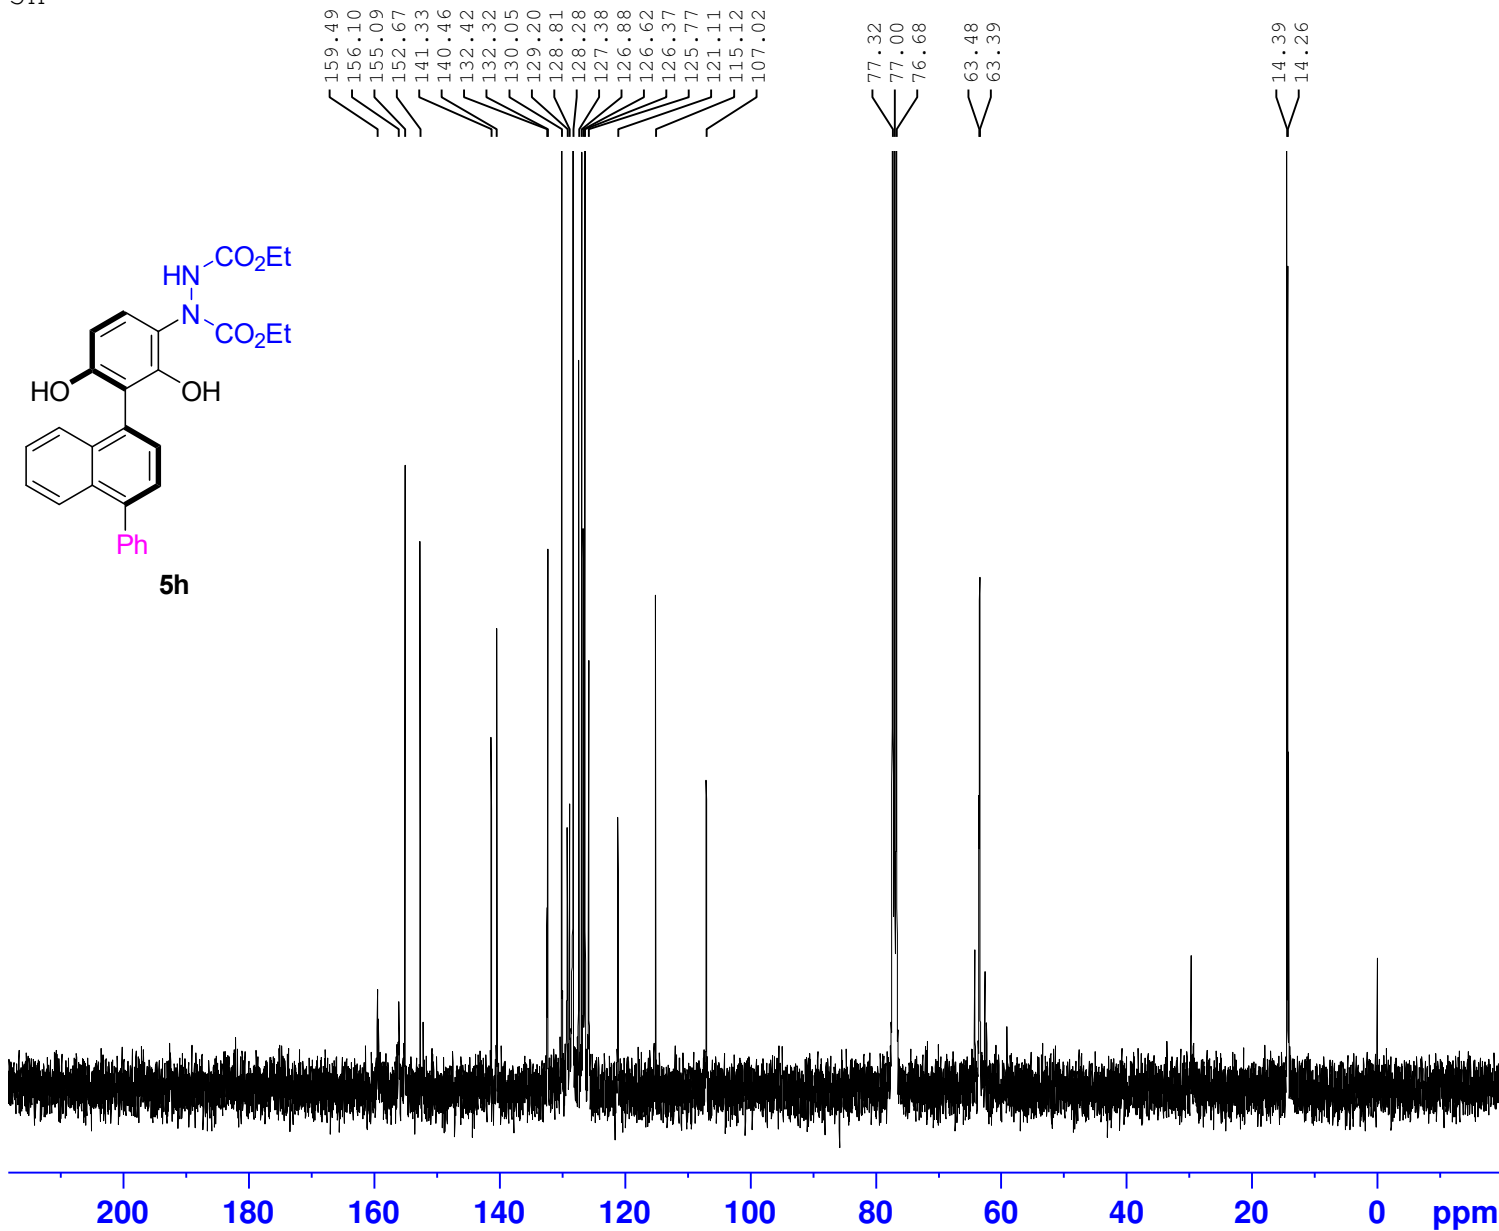

Current Data Parameters  
NAME 20240131  
EXPNO 21  
PROCNO 1

F2 - Acquisition Parameters  
Date\_ 20240131  
Time 2.02  
INSTRUM spect  
PROBHD 5 mm PADUL 13C  
PULPROG zgpg30  
TD 65536  
SOLVENT CDC13  
NS 1024  
DS 4  
SWH 24038.461 Hz  
FIDRES 0.366798 Hz  
AQ 1.3631488 sec  
RG 35.06  
DW 20.800 usec  
DE 6.50 usec  
TE 290.8 K  
D1 2.00000000 sec  
D11 0.03000000 sec  
TD0 1

=====  
CHANNEL f1  
NUC1 13C  
P1 9.80 usec  
PLW1 47.40000153 W  
SFO1 100.6379178 MHz

=====  
CHANNEL f2  
CPDPRG[2] waltz16  
NUC2 1H  
PCPD2 90.00 usec  
PLW2 23.00000000 W  
PLW12 0.30712000 W  
PLW13 0.24877000 W  
SFO2 400.1916008 MHz

F2 - Processing parameters  
SI 32768  
SF 100.6278648 MHz  
WDW EM  
SSB 0  
LB 1.00 Hz  
GB 0  
PC 1.40

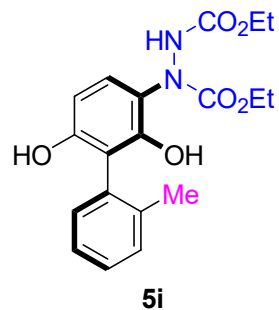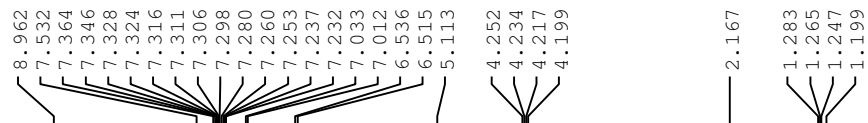

Current Data Parameters  
 NAME 20240118-400  
 EXPNO 30  
 PROCNO 1

F2 - Acquisition Parameters  
 Date\_ 20240118  
 Time 4.07  
 INSTRUM spect  
 PROBHD 5 mm PADUL 13C  
 PULPROG zg30  
 TD 65536  
 SOLVENT CDC13  
 NS 8  
 DS 2  
 SWH 8223.685 Hz  
 FIDRES 0.125483 Hz  
 AQ 3.9845889 sec  
 RG 29.75  
 DW 60.800 usec  
 DE 6.50 usec  
 TE 291.6 K  
 D1 1.00000000 sec  
 TD0 1

===== CHANNEL f1 =====  
 NUC1 1H  
 P1 9.90 usec  
 PLW1 23.00000000 W  
 SFO1 400.1924713 MHz

F2 - Processing parameters  
 SI 65536  
 SF 400.1900138 MHz  
 WDW EM  
 SSB 0  
 LB 0.30 Hz  
 GB 0  
 PC 1.00

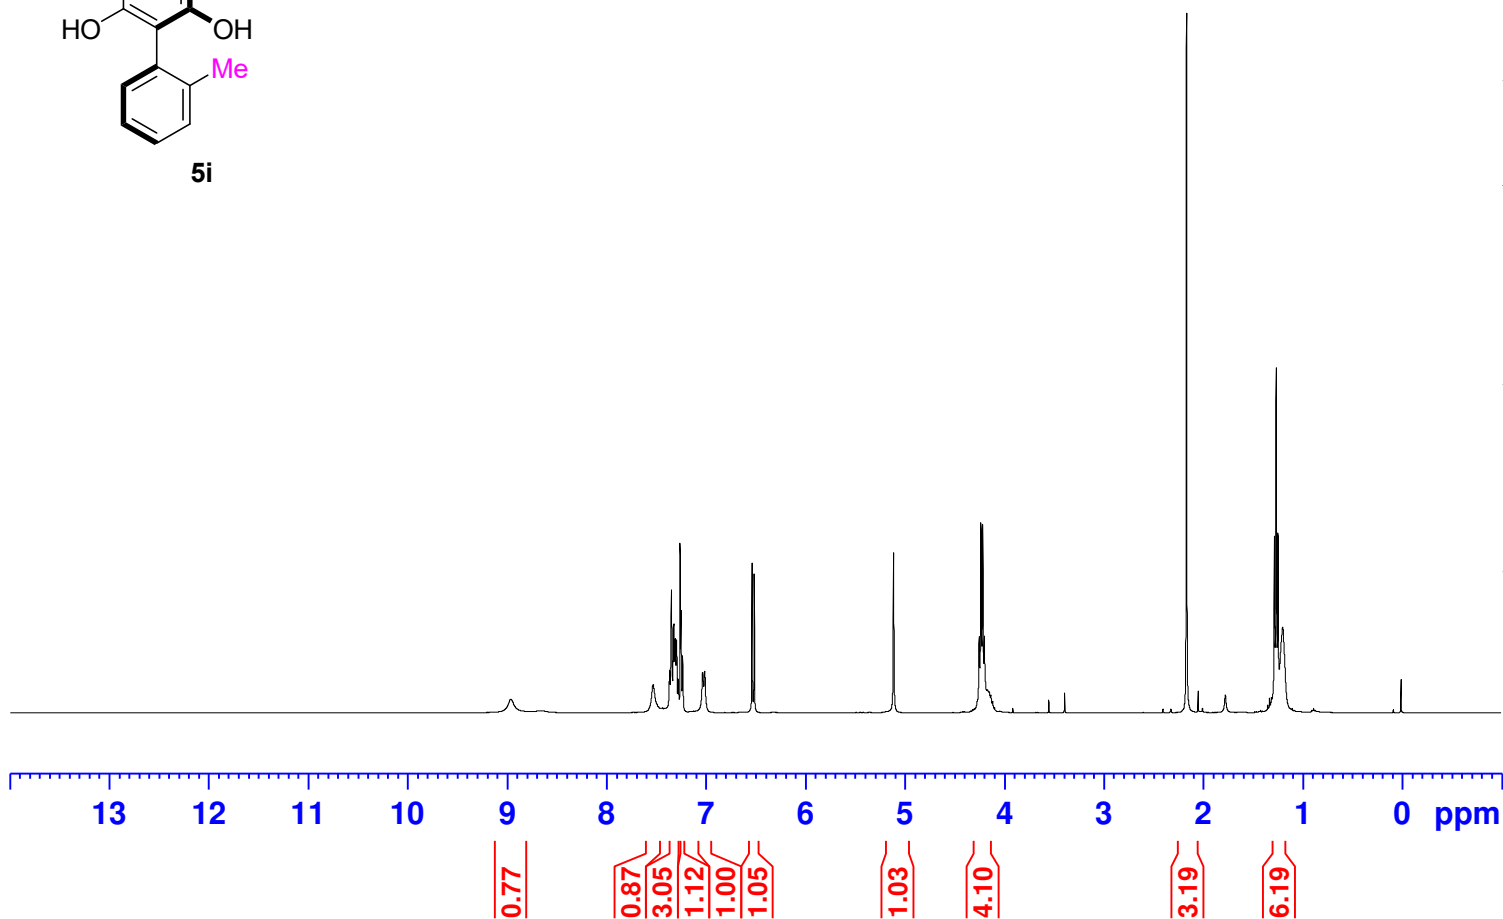

5i

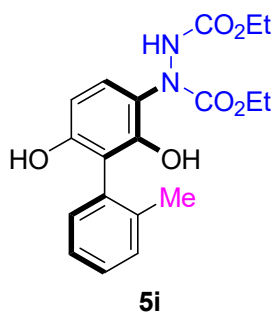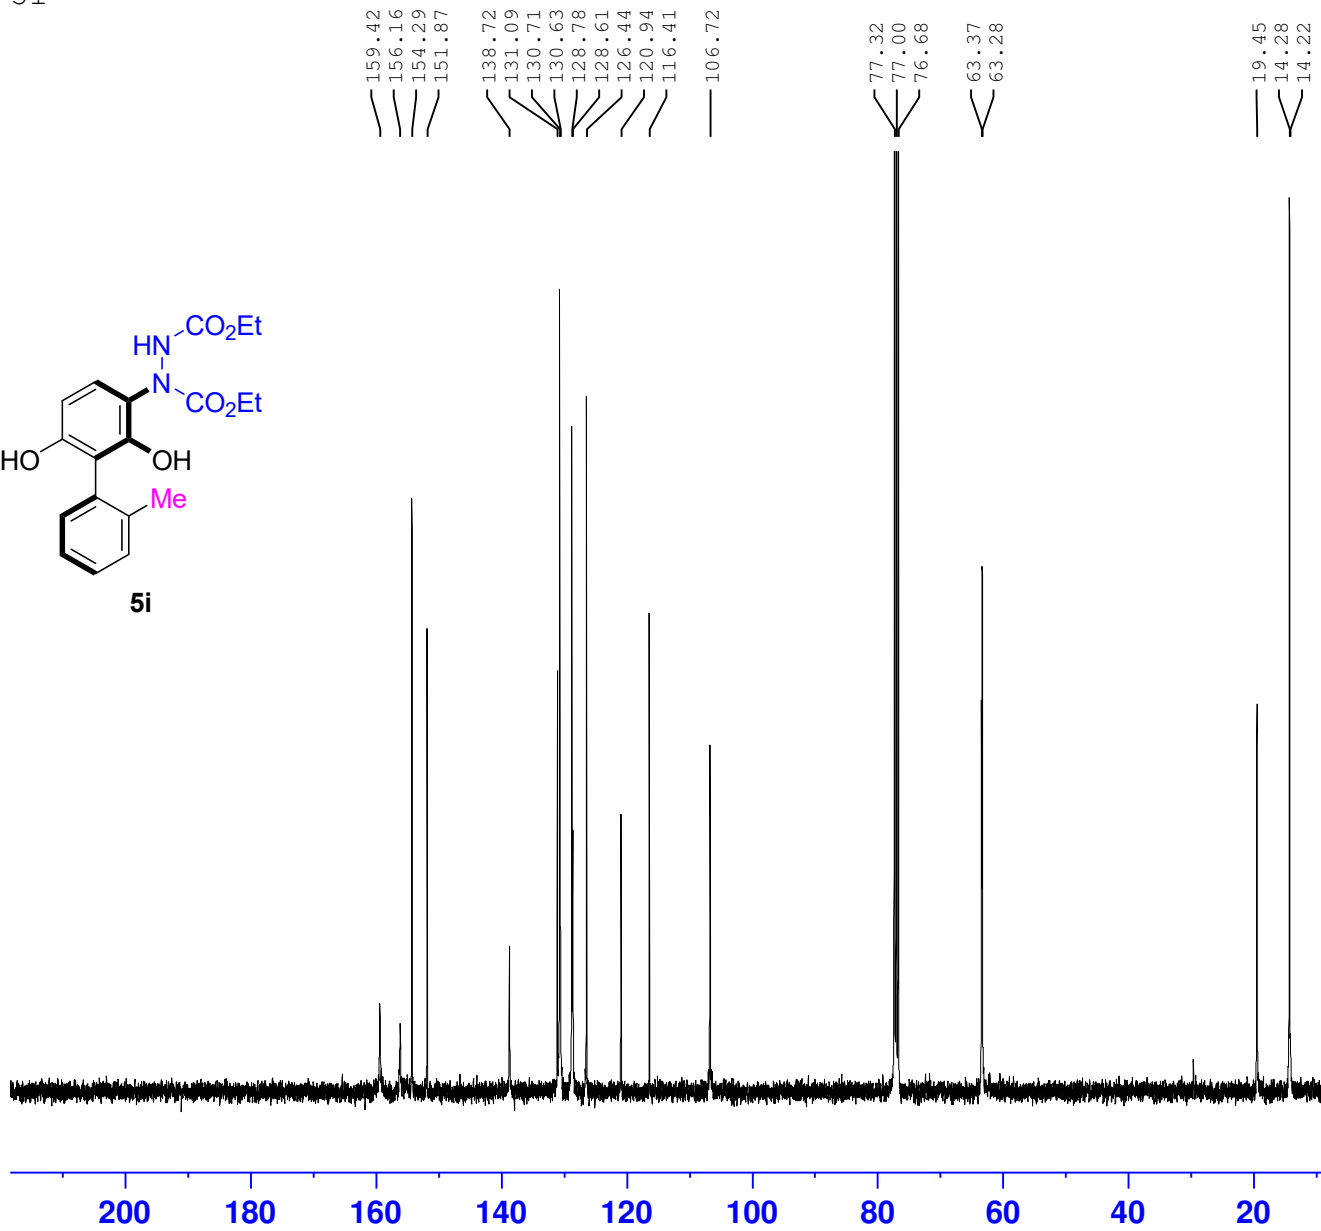

Current Data Parameters  
NAME 20240118-400  
EXPNO 29  
PROCNO 1

F2 - Acquisition Parameters  
Date\_ 20240118  
Time 4.06  
INSTRUM spect  
PROBHD 5 mm PADUL 13C  
PULPROG zgpg30  
TD 65536  
SOLVENT CDC13  
NS 1024  
DS 4  
SWH 24038.461 Hz  
FIDRES 0.366798 Hz  
AQ 1.3631488 sec  
RG 37.77  
DW 20.800 usec  
DE 6.50 usec  
TE 292.0 K  
D1 2.00000000 sec  
D11 0.03000000 sec  
TD0 1

==== CHANNEL f1 =====  
NUC1 13C  
P1 9.80 usec  
PLW1 47.40000153 W  
SFO1 100.6379178 MHz

==== CHANNEL f2 =====  
CPDPRG[2] waltz16  
NUC2 1H  
PCPD2 90.00 usec  
PLW2 23.00000000 W  
PLW12 0.30712000 W  
PLW13 0.24877000 W  
SFO2 400.1916008 MHz

F2 - Processing parameters  
SI 32768  
SF 100.6278678 MHz  
WDW EM  
SSB 0  
LB 1.00 Hz  
GB 0  
PC 1.40

5j

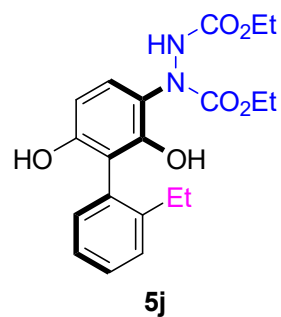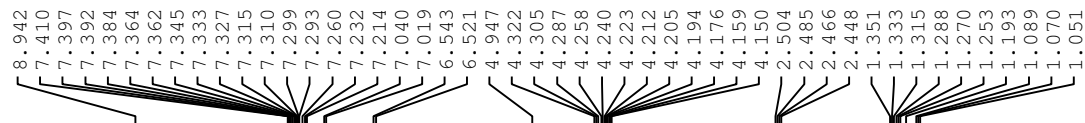

Current Data Parameters  
 NAME 20240131  
 EXPNO 27  
 PROCNO 1

F2 - Acquisition Parameters  
 Date\_ 20240130  
 Time 3.38  
 INSTRUM spect  
 PROBHD 5 mm PADUL 13C  
 PULPROG zg30  
 TD 65536  
 SOLVENT CDC13  
 NS 6  
 DS 2  
 SWH 8223.685 Hz  
 FIDRES 0.125483 Hz  
 AQ 3.9845889 sec  
 RG 90.23  
 DW 60.800 usec  
 DE 6.50 usec  
 TE 290.5 K  
 D1 1.00000000 sec  
 TD0 1

==== CHANNEL f1 =====  
 NUC1 1H  
 P1 9.90 usec  
 PLW1 23.00000000 W  
 SFO1 400.1924713 MHz

F2 - Processing parameters  
 SI 65536  
 SF 400.1900137 MHz  
 WDW EM  
 SSB 0  
 LB 0.30 Hz  
 GB 0  
 PC 1.00

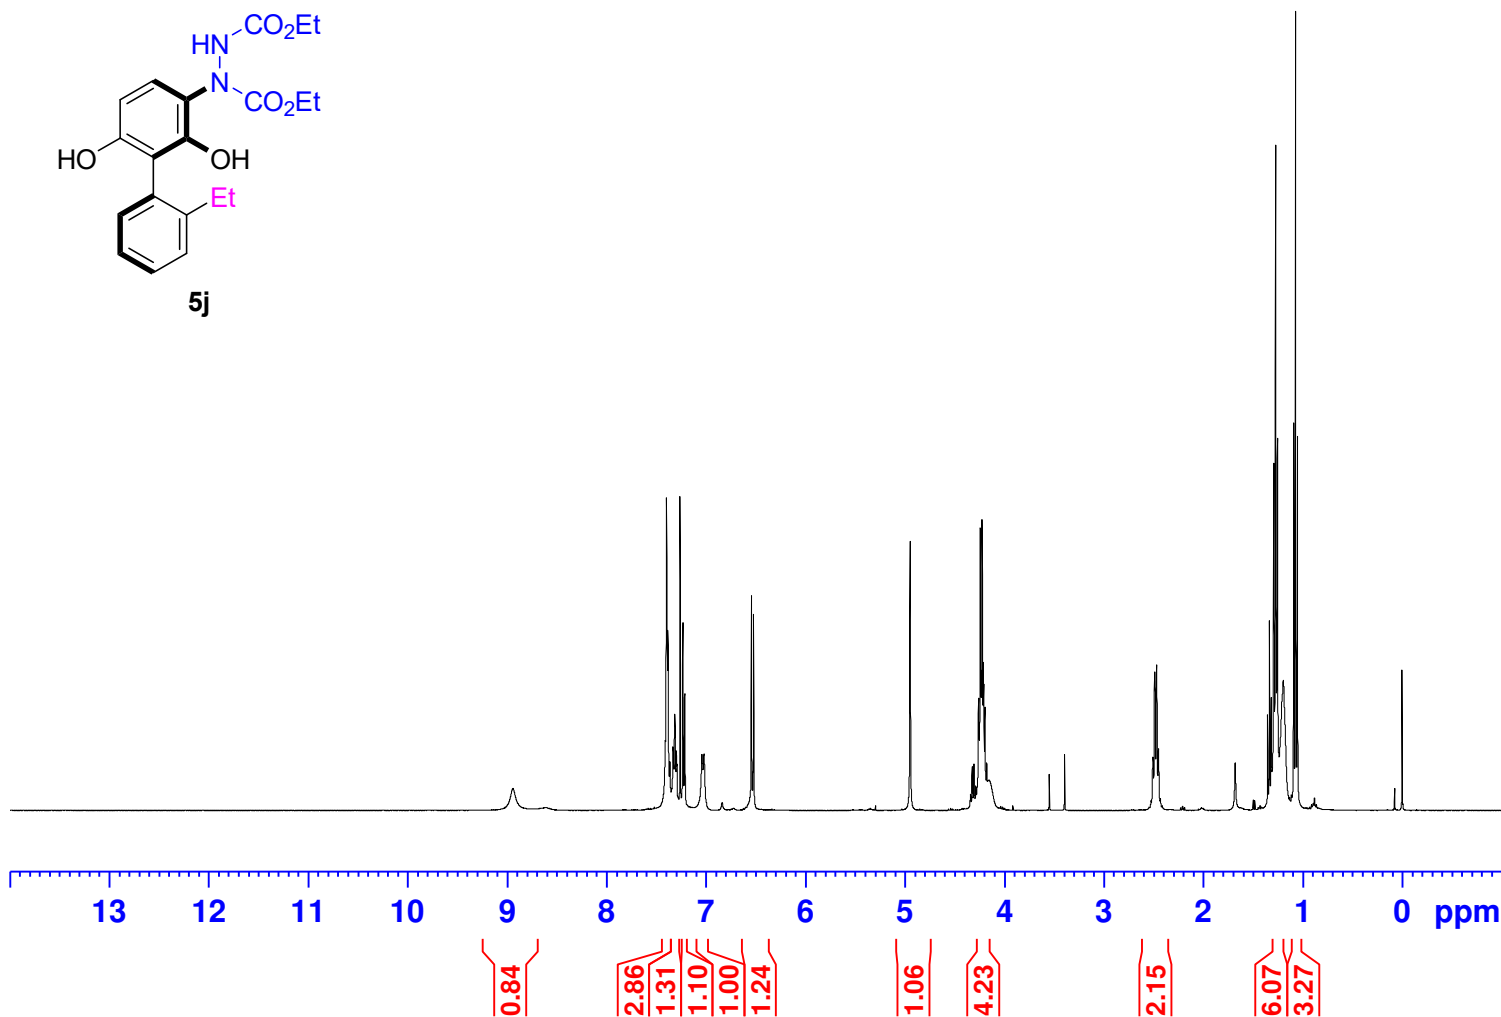

5j

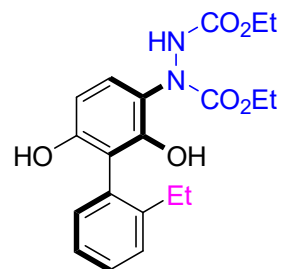

5j

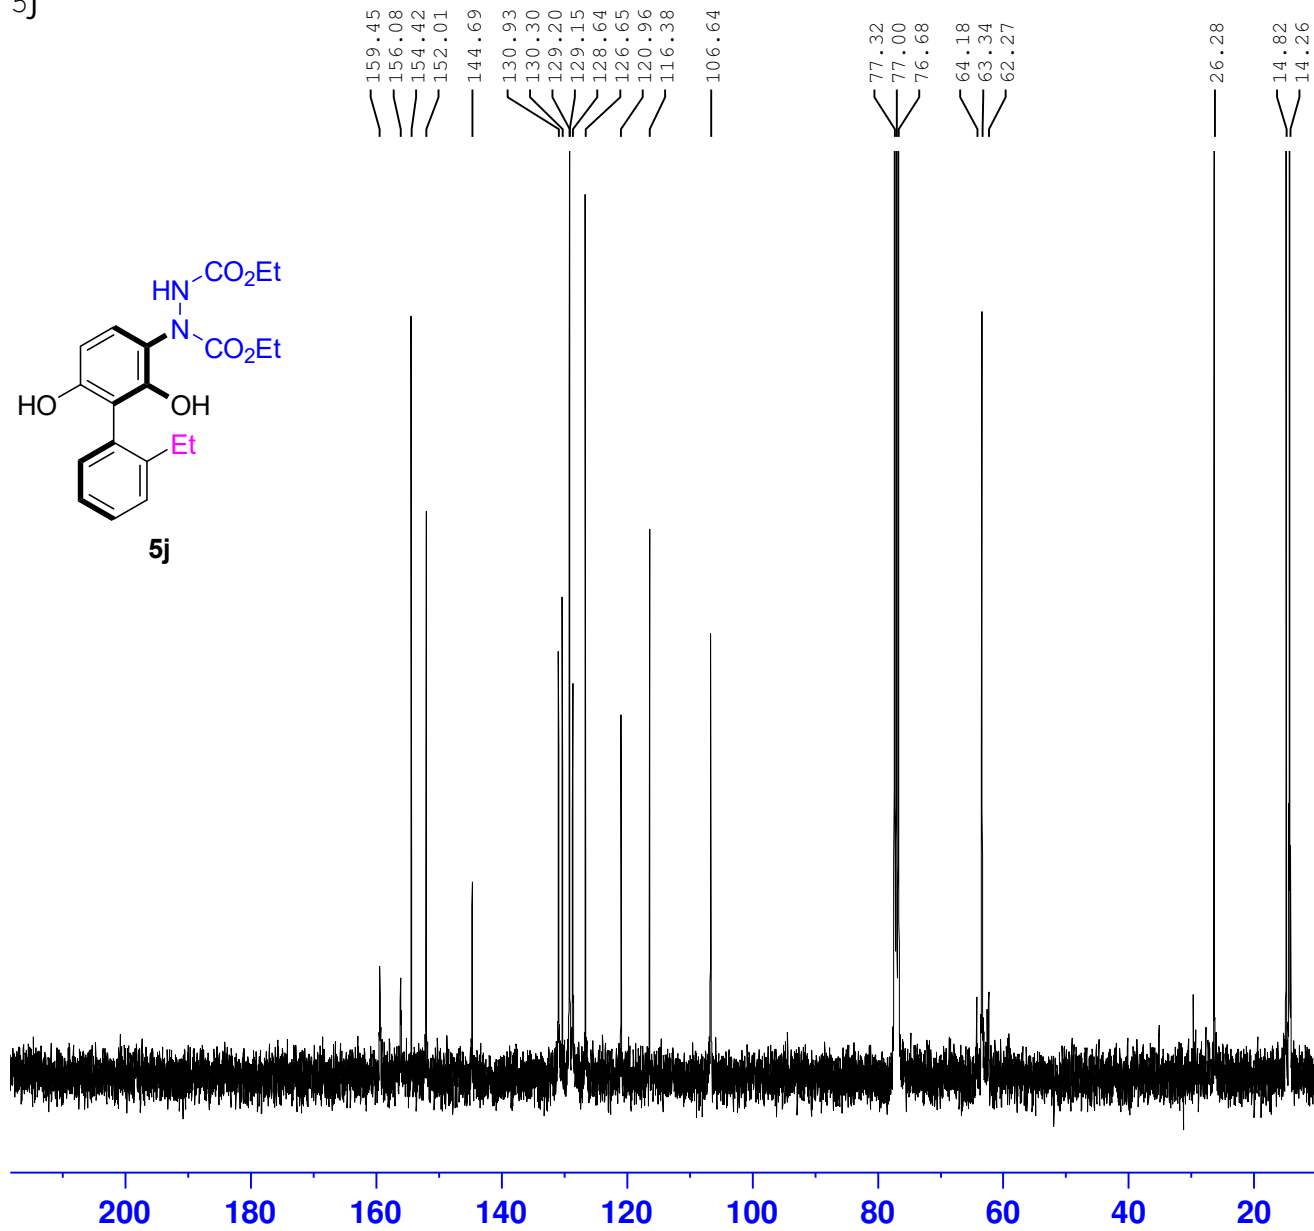

159.45  
156.08  
154.42  
152.01  
144.69  
130.93  
130.30  
129.20  
129.15  
128.64  
126.65  
120.96  
116.38  
106.64

77.32  
77.00  
76.68  
64.18  
63.34  
62.27

26.28

14.82  
14.26



Current Data Parameters  
NAME 20240131  
EXPNO 28  
PROCNO 1

F2 - Acquisition Parameters

Date\_ 20240130  
Time 4.38  
INSTRUM spect  
PROBHD 5 mm PADUL 13C  
PULPROG zgpg30  
TD 65536  
SOLVENT CDC13  
NS 1024  
DS 4  
SWH 24038.461 Hz  
FIDRES 0.366798 Hz  
AQ 1.3631488 sec  
RG 35.06  
DW 20.800 usec  
DE 6.50 usec  
TE 291.0 K  
D1 2.00000000 sec  
D11 0.03000000 sec  
TD0 1

===== CHANNEL f1 =====  
NUC1 13C  
P1 9.80 usec  
PLW1 47.40000153 W  
SFO1 100.6379178 MHz

===== CHANNEL f2 =====  
CPDPRG[2] waltz16  
NUC2 1H  
PCPD2 90.00 usec  
PLW2 23.00000000 W  
PLW12 0.30712000 W  
PLW13 0.24877000 W  
SFO2 400.1916008 MHz

F2 - Processing parameters  
SI 32768  
SF 100.6278642 MHz  
WDW EM  
SSB 0  
LB 1.00 Hz  
GB 0  
PC 1.40

5k

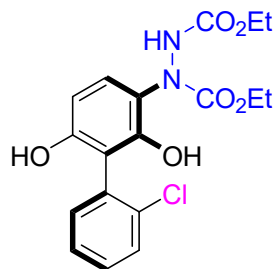

5k

9.348  
9.096  
8.424  
7.479  
7.474  
7.468  
7.463  
7.455  
7.353  
7.340  
7.335  
7.326  
7.318  
7.313  
7.302  
7.292  
7.290  
7.098  
7.077  
6.512  
6.490  
4.231  
4.213  
4.196  
4.178  
4.144  
4.129  
4.104  
2.061  
2.055  
2.050  
2.045  
2.039  
1.286  
1.262  
1.244  
1.226  
1.204  
1.151



Current Data Parameters  
NAME 20240125-400  
EXPNO 19  
PROCNO 1

F2 - Acquisition Parameters  
Date\_ 20240125  
Time 2.37  
INSTRUM spect  
PROBHD 5 mm PADUL 13C  
PULPROG zg30  
TD 65536  
SOLVENT Acetone  
NS 8  
DS 2  
SWH 8223.685 Hz  
FIDRES 0.125483 Hz  
AQ 3.9845889 sec  
RG 53.3  
DW 60.800 usec  
DE 6.50 usec  
TE 289.3 K  
D1 1.00000000 sec  
TD0 1

==== CHANNEL f1 =====  
NUC1 1H  
P1 9.90 usec  
PLW1 23.00000000 W  
SFO1 400.1924713 MHz

F2 - Processing parameters  
SI 65536  
SF 400.1900109 MHz  
WDW EM  
SSB 0  
LB 0.30 Hz  
GB 0  
PC 1.00

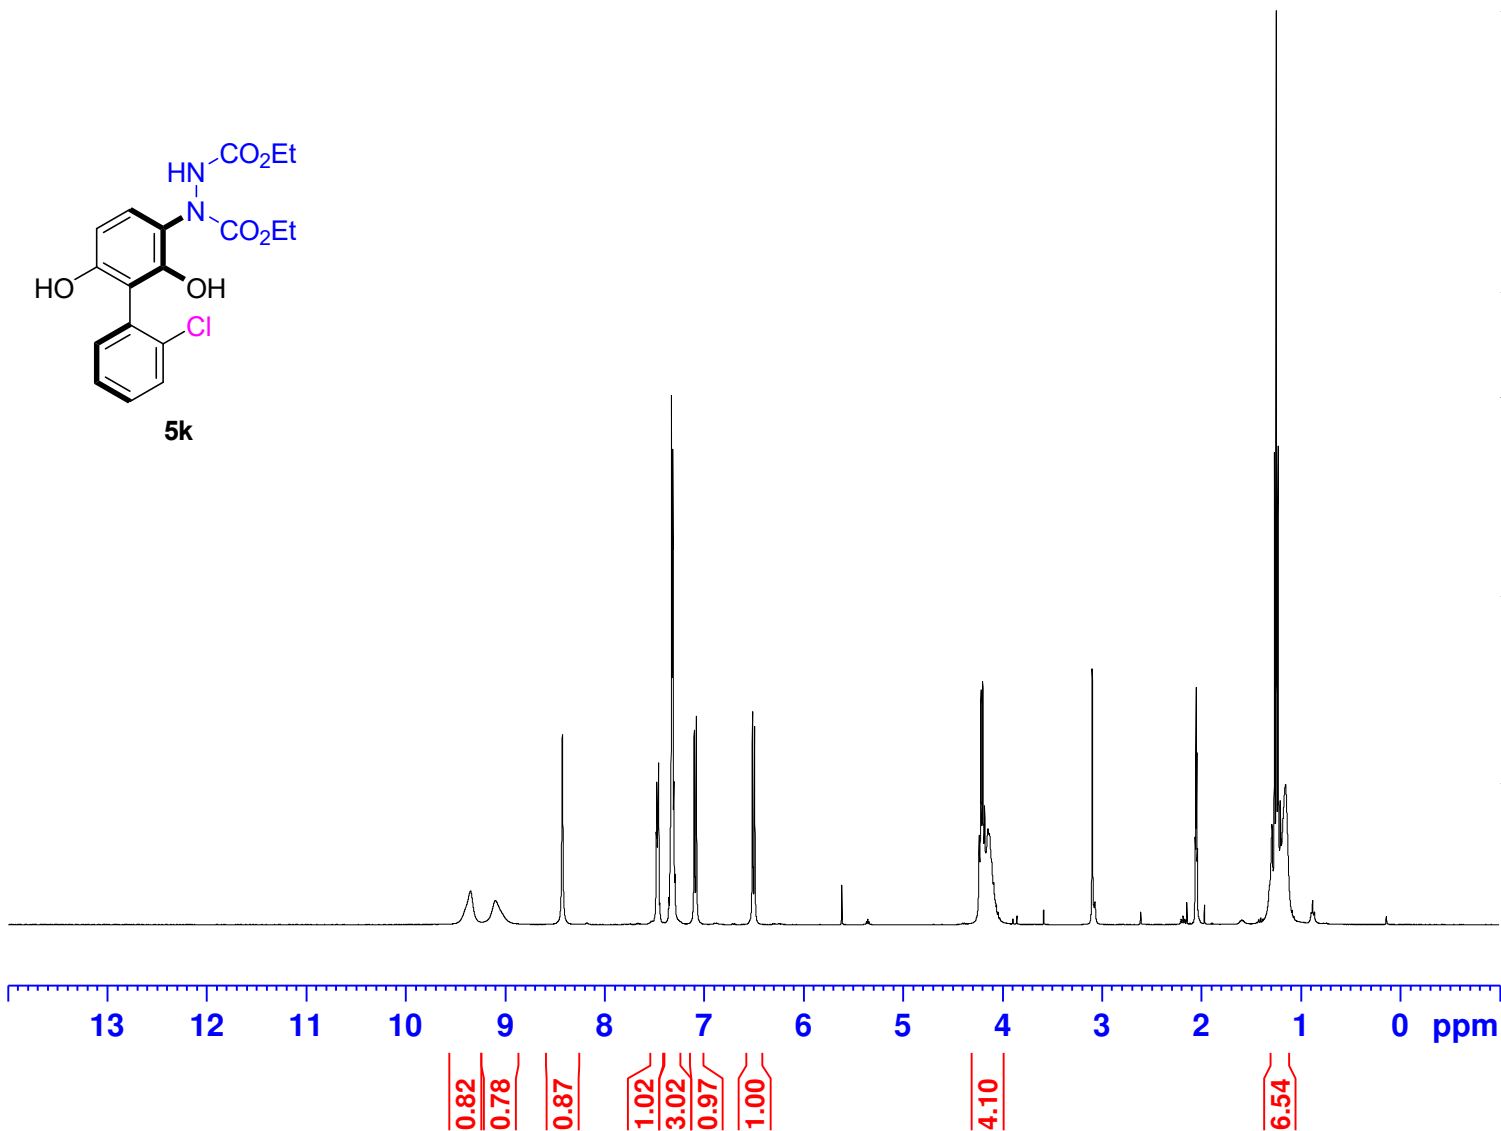



5k



Current Data Parameters  
 NAME 20240125-400  
 EXPNO 18  
 PROCNO 1

F2 - Acquisition Parameters  
 Date\_ 20240125  
 Time 2.35  
 INSTRUM spect  
 PROBHD 5 mm PADUL 13C  
 PULPROG zgpg30  
 TD 65536  
 SOLVENT Acetone  
 NS 1024  
 DS 4  
 SWH 24038.461 Hz  
 FIDRES 0.366798 Hz  
 AQ 1.3631488 sec  
 RG 28.08  
 DW 20.800 usec  
 DE 6.50 usec  
 TE 289.8 K  
 D1 2.00000000 sec  
 D11 0.03000000 sec  
 TD0 1

===== CHANNEL f1 =====  
 NUC1 13C  
 P1 9.80 usec  
 PLW1 47.40000153 W  
 SFO1 100.6379178 MHz

===== CHANNEL f2 =====  
 CPDPRG[2] waltz16  
 NUC2 1H  
 PCPD2 90.00 usec  
 PLW2 23.00000000 W  
 PLW12 0.30712000 W  
 PLW13 0.24877000 W  
 SFO2 400.1916008 MHz

F2 - Processing parameters  
 SI 32768  
 SF 100.6277903 MHz  
 WDW EM  
 SSB 0  
 LB 1.00 Hz  
 GB 0  
 PC 1.40

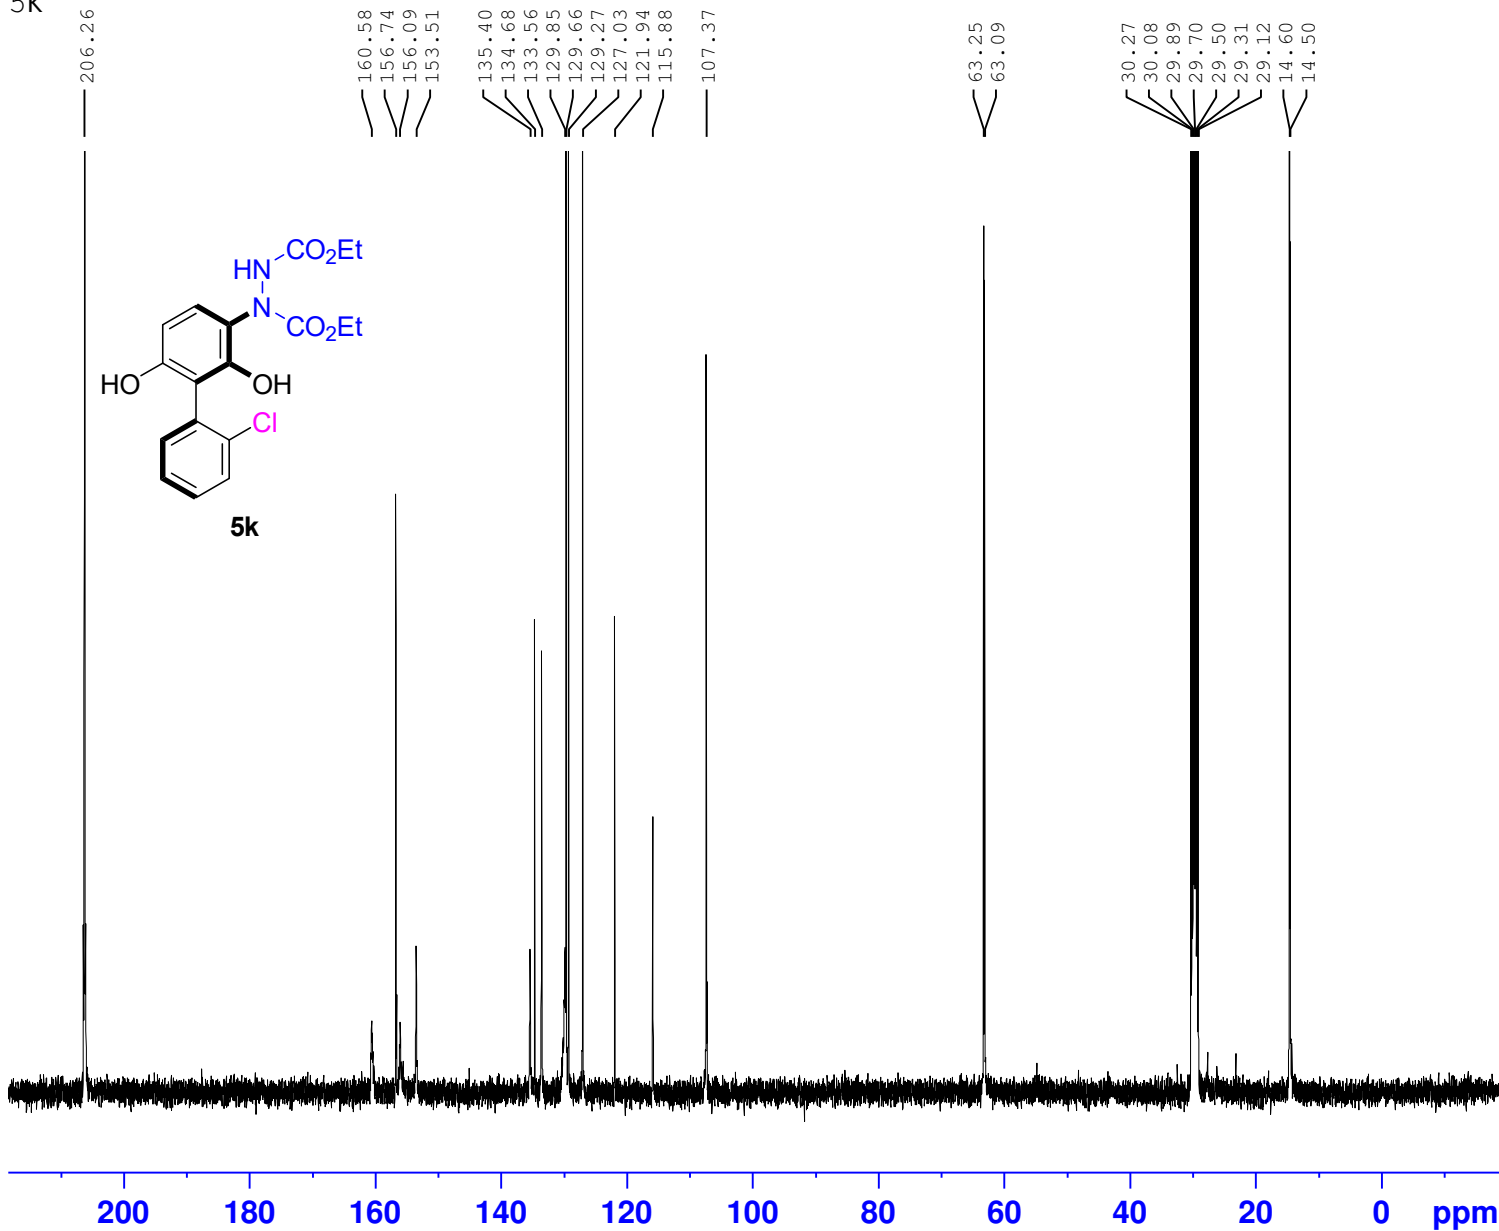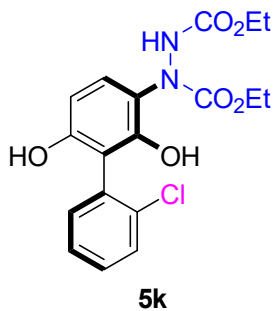

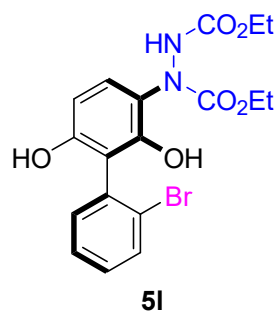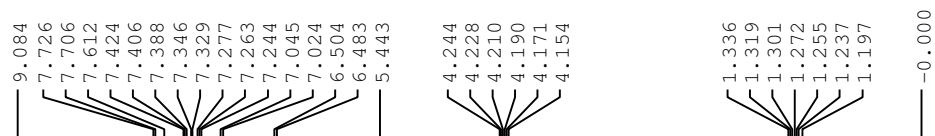

Current Data Parameters  
NAME 20240131  
EXPNO 25  
PROCNO 1

F2 - Acquisition Parameters  
Date\_ 20240130  
Time 2.35  
INSTRUM spect  
PROBHD 5 mm PADUL 13C  
PULPROG zg30  
TD 65536  
SOLVENT CDC13  
NS 6  
DS 2  
SWH 8223.685 Hz  
FIDRES 0.125483 Hz  
AQ 3.9845889 sec  
RG 29.75  
DW 60.800 usec  
DE 6.50 usec  
TE 290.6 K  
D1 1.00000000 sec  
TD0 1

===== CHANNEL f1 =====  
NUC1 1H  
P1 9.90 usec  
PLW1 23.00000000 W  
SFO1 400.1924713 MHz

F2 - Processing parameters  
SI 65536  
SF 400.1900126 MHz  
WDW EM  
SSB 0  
LB 0.30 Hz  
GB 0  
PC 1.00

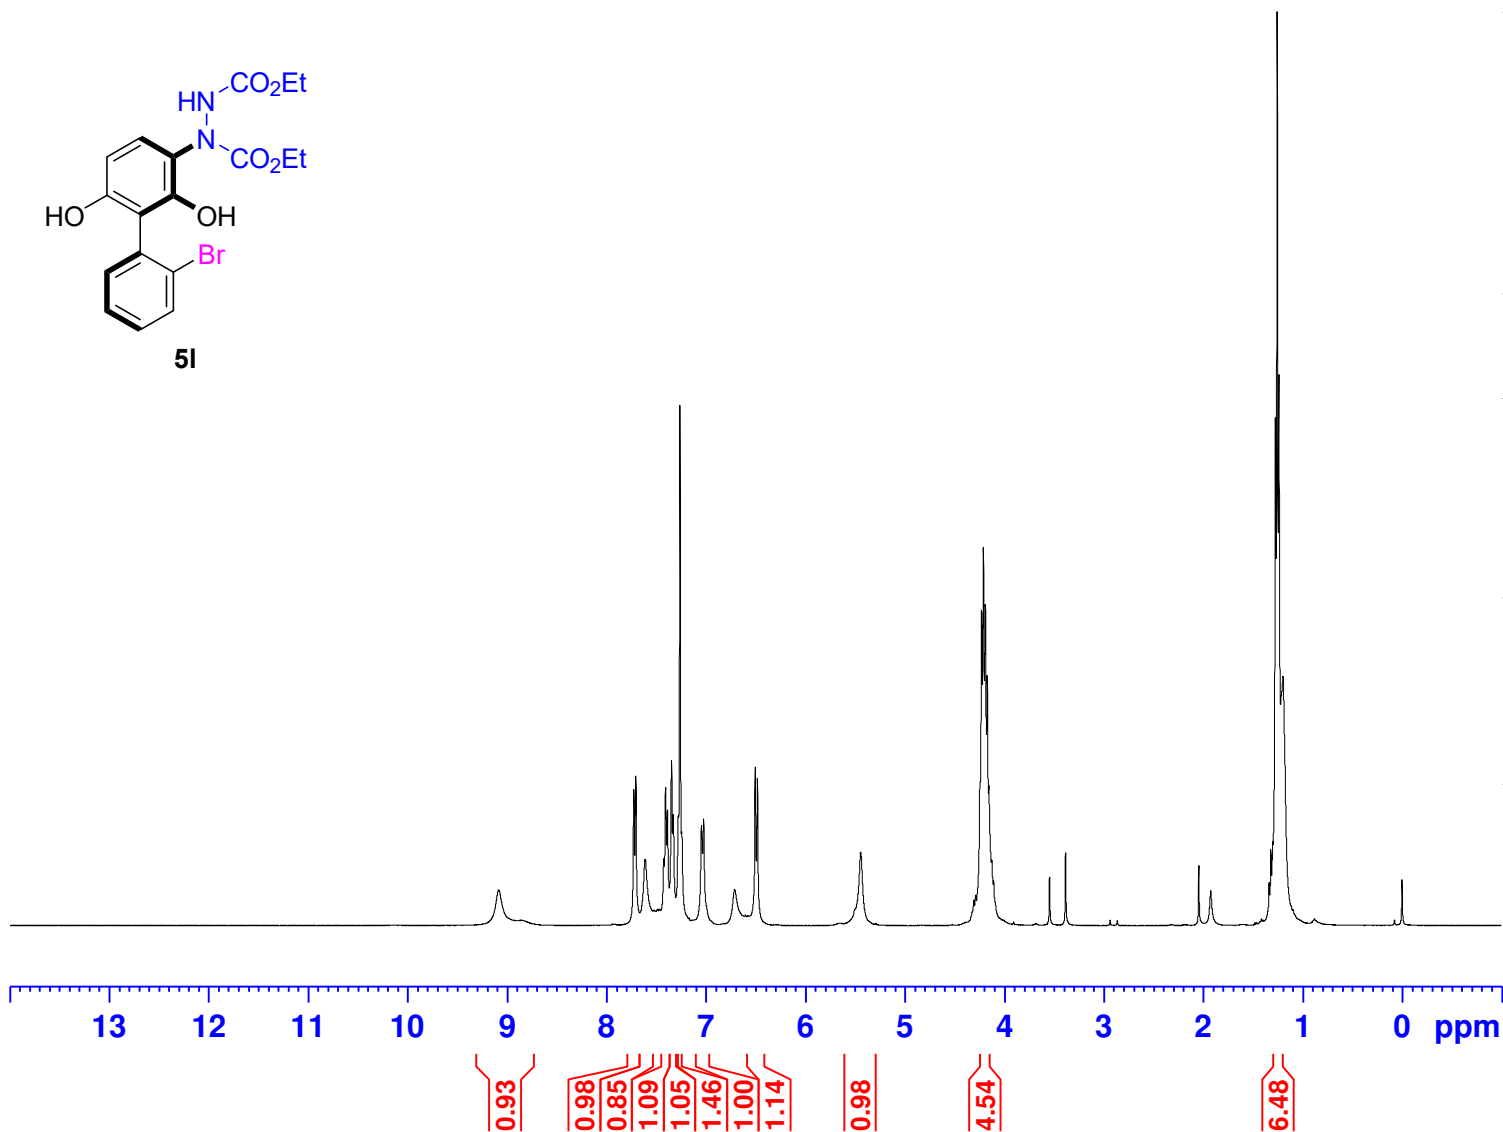

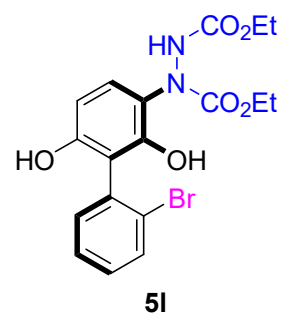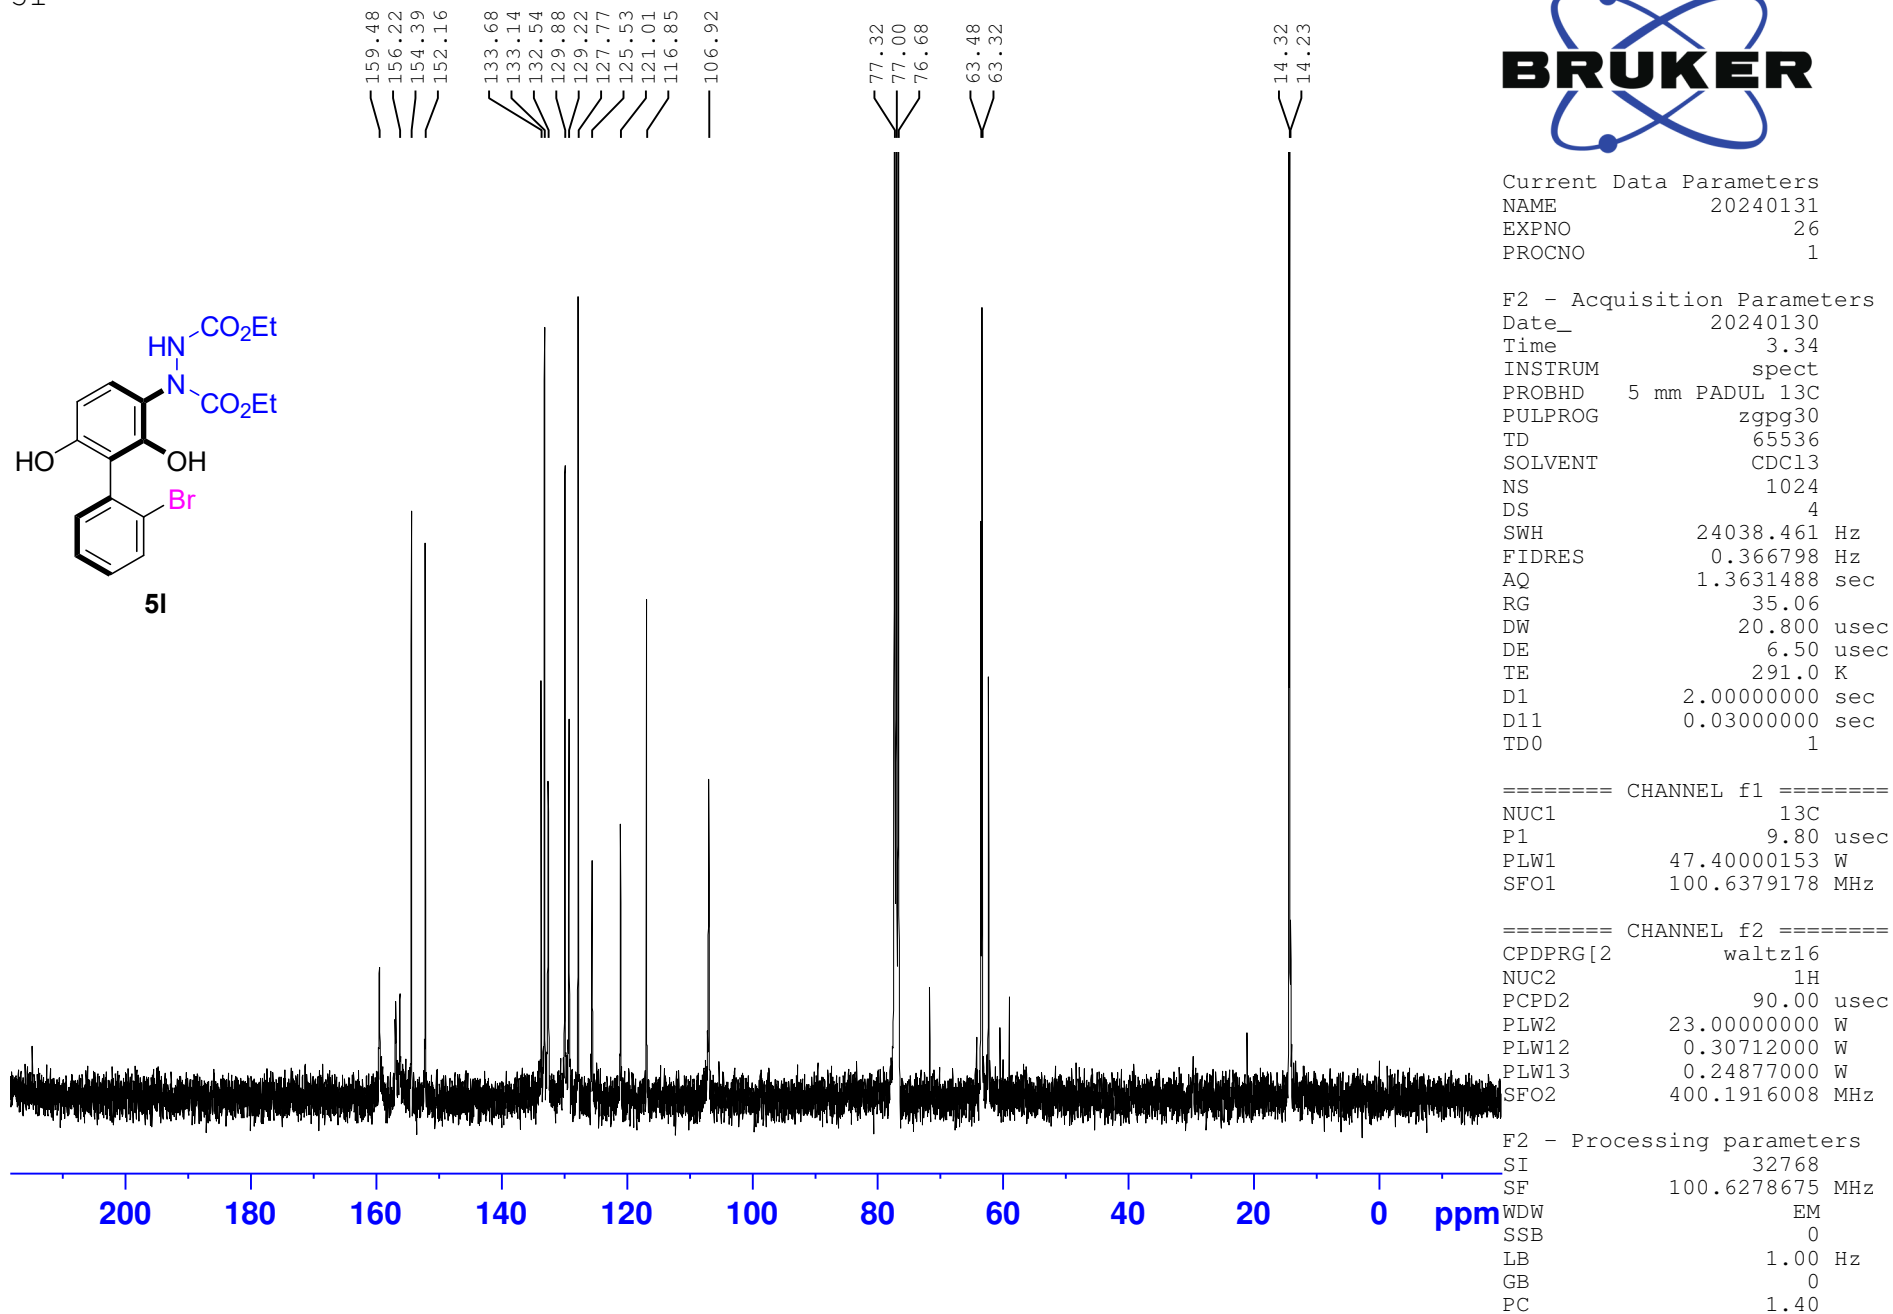

Current Data Parameters  
NAME 20240131  
EXPNO 26  
PROCNO 1

F2 - Acquisition Parameters  
Date\_ 20240130  
Time 3.34  
INSTRUM spect  
PROBHD 5 mm PADUL 13C  
PULPROG zgpg30  
TD 65536  
SOLVENT CDC13  
NS 1024  
DS 4  
SWH 24038.461 Hz  
FIDRES 0.366798 Hz  
AQ 1.3631488 sec  
RG 35.06  
DW 20.800 usec  
DE 6.50 usec  
TE 291.0 K  
D1 2.00000000 sec  
D11 0.03000000 sec  
TD0 1

5m

9.011  
8.790  
8.770  
8.757  
8.736  
7.912  
7.893  
7.821  
7.730  
7.712  
7.694  
7.674  
7.645  
7.627  
7.608  
7.558  
7.539  
7.520  
7.488  
7.424  
7.376  
7.260  
7.174  
7.129  
7.110  
6.624  
6.624  
5.349  
4.243  
4.224  
4.214  
4.196  
4.179  
4.161

1.285  
1.268  
1.258  
1.250  
1.241  
1.223

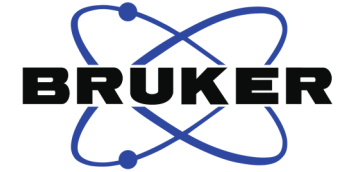

Current Data Parameters  
NAME 20240118-400  
EXPNO 28  
PROCNO 1

F2 - Acquisition Parameters  
Date\_ 20240118  
Time 3.04  
INSTRUM spect  
PROBHD 5 mm PADUL 13C  
PULPROG zg30  
TD 65536  
SOLVENT CDC13  
NS 8  
DS 2  
SWH 8223.685 Hz  
FIDRES 0.125483 Hz  
AQ 3.9845889 sec  
RG 53.3  
DW 60.800 usec  
DE 6.50 usec  
TE 291.6 K  
D1 1.00000000 sec  
TD0 1

===== CHANNEL f1 =====  
NUC1 1H  
P1 9.90 usec  
PLW1 23.00000000 W  
SFO1 400.1924713 MHz

F2 - Processing parameters  
SI 65536  
SF 400.1900138 MHz  
WDW EM  
SSB 0  
LB 0.30 Hz  
GB 0  
PC 1.00

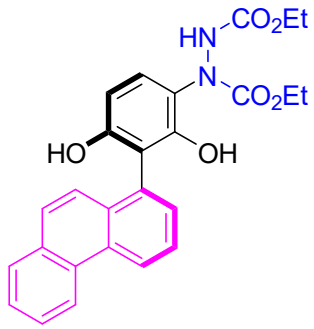

5m

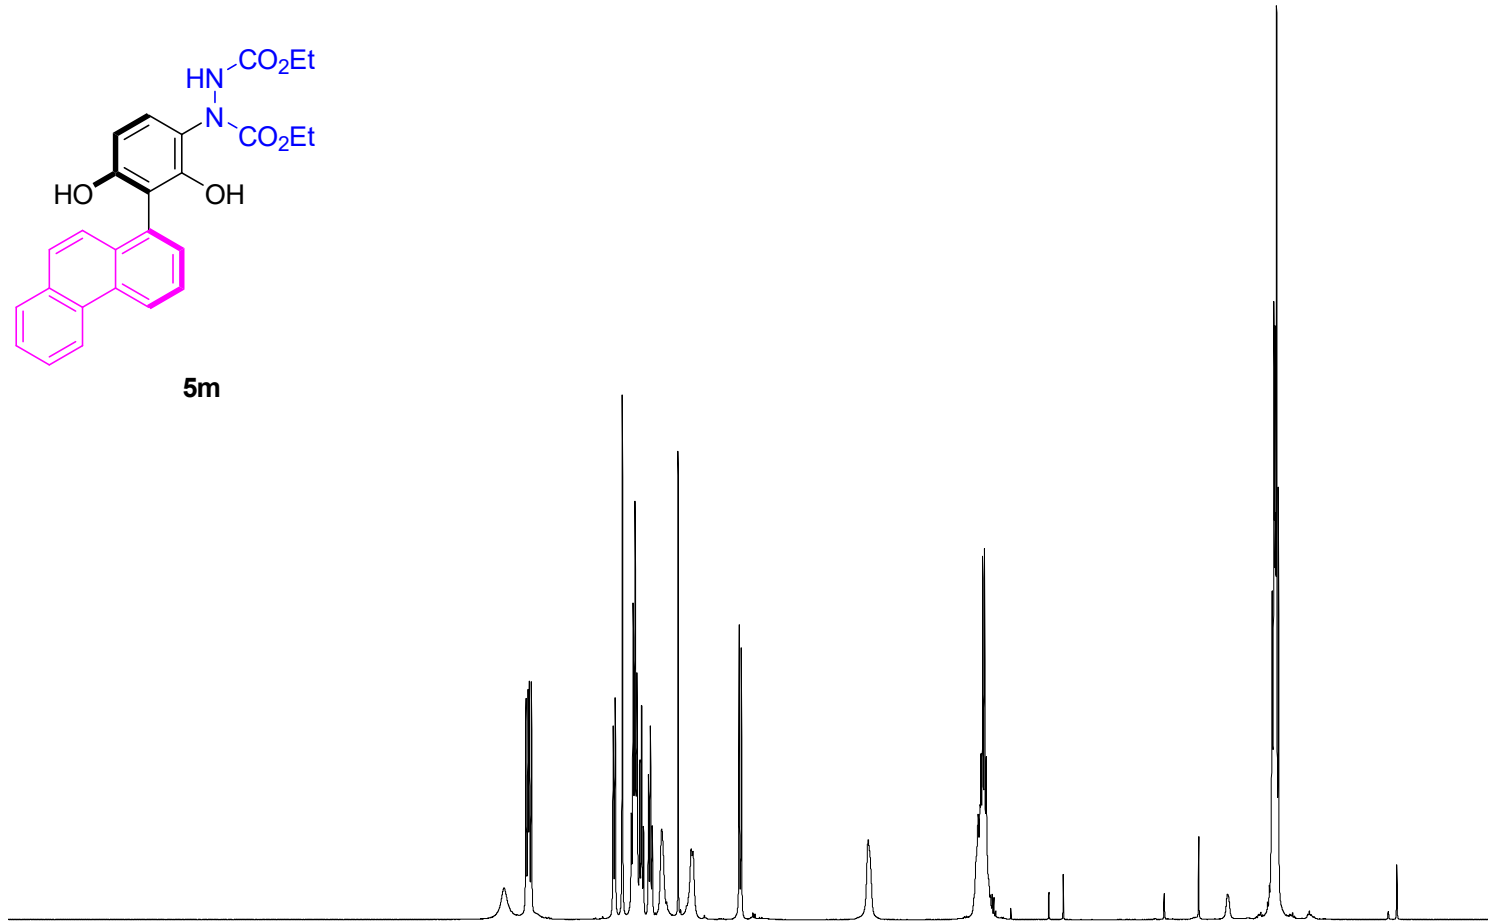

13 12 11 10 9 8 7 6 5 4 3 2 1 0 ppm

0.85  
2.14  
1.11  
1.09  
4.11  
1.11  
1.02  
1.00  
1.08  
1.10  
4.02  
6.26

5m

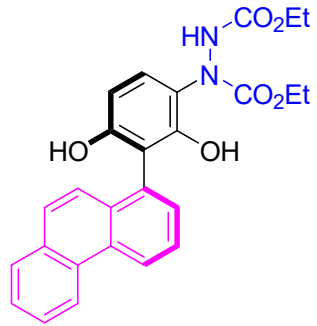

5m

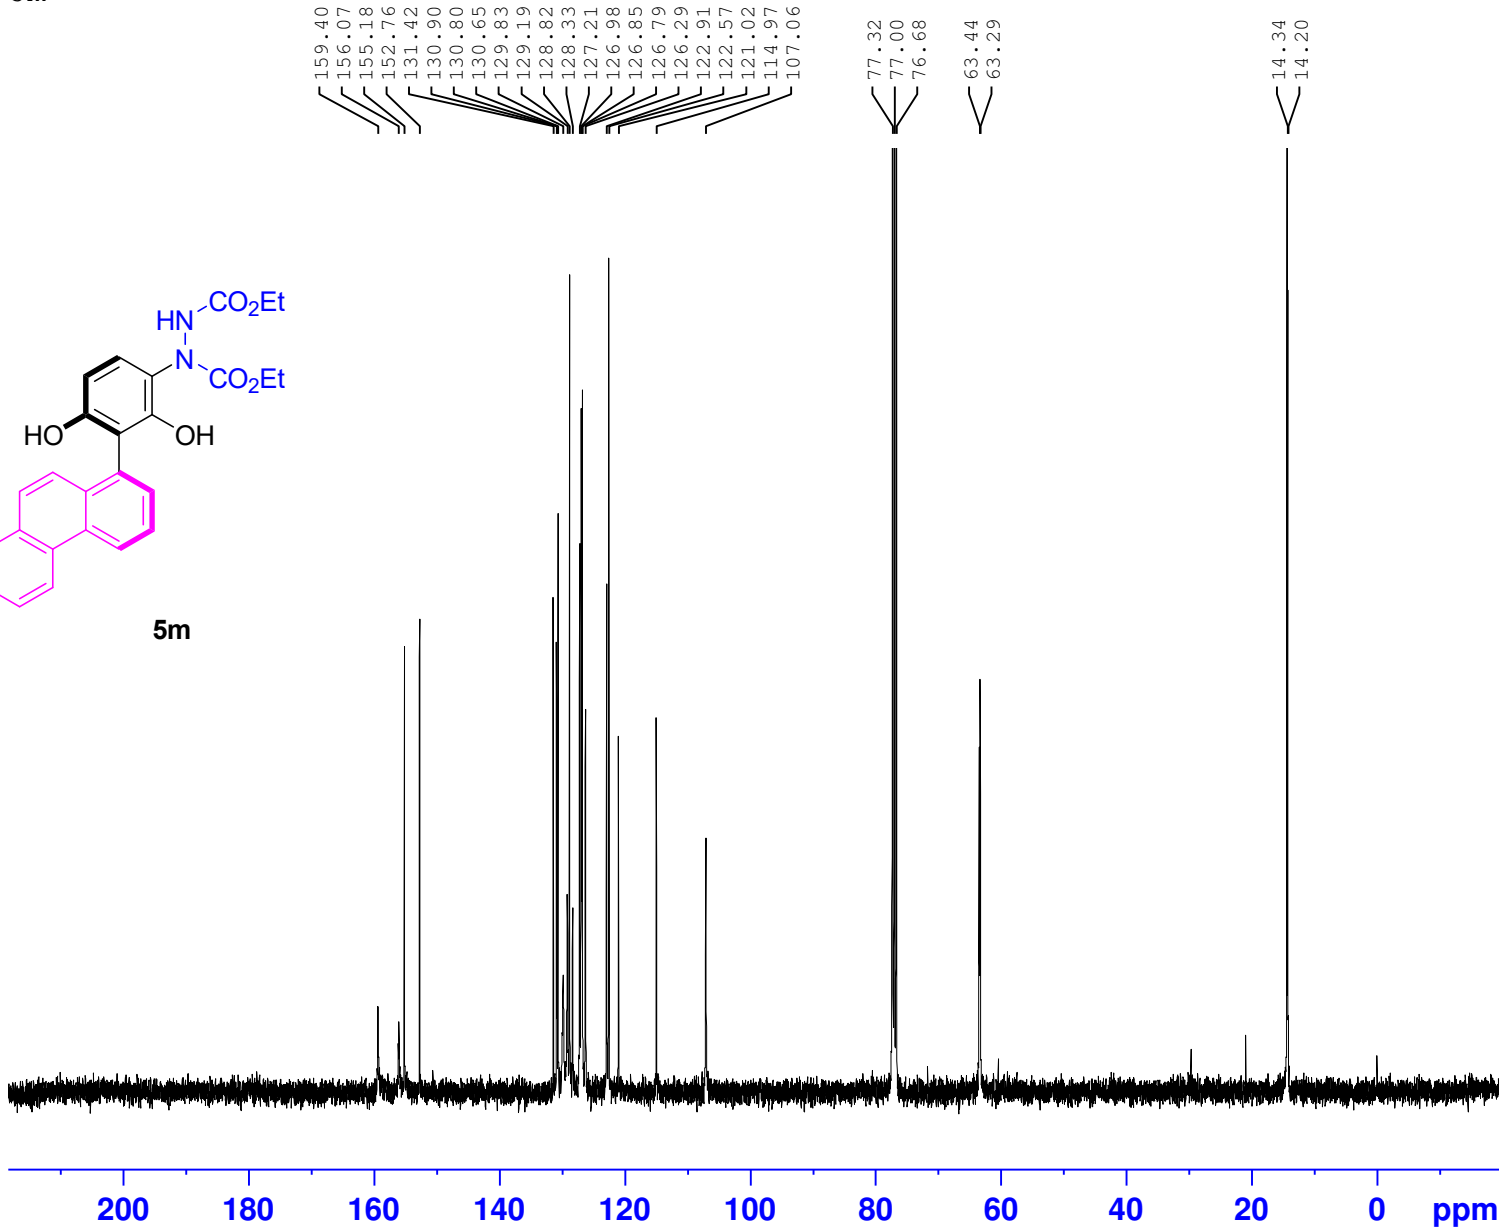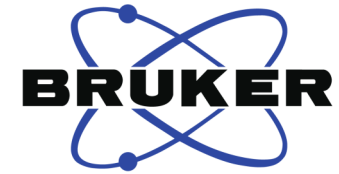

Current Data Parameters  
 NAME 20240118-400  
 EXPNO 27  
 PROCNO 1

F2 - Acquisition Parameters  
 Date\_ 20240118  
 Time 3.02  
 INSTRUM spect  
 PROBHD 5 mm PADUL 13C  
 PULPROG zgpg30  
 TD 65536  
 SOLVENT CDC13  
 NS 1024  
 DS 4  
 SWH 24038.461 Hz  
 FIDRES 0.366798 Hz  
 AQ 1.3631488 sec  
 RG 37.77  
 DW 20.800 usec  
 DE 6.50 usec  
 TE 292.1 K  
 D1 2.00000000 sec  
 D11 0.03000000 sec  
 TD0 1

==== CHANNEL f1 =====  
 NUC1 13C  
 P1 9.80 usec  
 PLW1 47.40000153 W  
 SFO1 100.6379178 MHz

==== CHANNEL f2 =====  
 CPDPRG[2] waltz16  
 NUC2 1H  
 PCPD2 90.00 usec  
 PLW2 23.00000000 W  
 PLW12 0.30712000 W  
 PLW13 0.24877000 W  
 SFO2 400.1916008 MHz

F2 - Processing parameters  
 SI 32768  
 SF 100.6278690 MHz  
 WDW EM  
 SSB 0  
 LB 1.00 Hz  
 GB 0  
 PC 1.40

zhh-7-70-1

7.855  
7.830  
7.805  
7.494  
7.477  
7.463  
7.447  
7.428  
7.365  
7.337  
7.321  
7.260  
7.093  
6.851  
6.572  
6.458  
6.338  
6.056

— 2.070  
— 1.437



Current Data Parameters  
NAME 20240530-400  
EXPNO 17  
PROCNO 1

F2 - Acquisition Parameters  
Date\_ 20240530  
Time 5.11  
INSTRUM spect  
PROBHD 5 mm PADUL 13C  
PULPROG zg30  
TD 65536  
SOLVENT CDC13  
NS 6  
DS 2  
SWH 8223.685 Hz  
FIDRES 0.125483 Hz  
AQ 3.9845889 sec  
RG 90.23  
DW 60.800 usec  
DE 6.50 usec  
TE 294.2 K  
D1 1.00000000 sec  
TD0 1

==== CHANNEL f1 =====  
NUC1 1H  
P1 9.90 usec  
PLW1 23.00000000 W  
SFO1 400.1924713 MHz

F2 - Processing parameters  
SI 65536  
SF 400.1900140 MHz  
WDW EM  
SSB 0  
LB 0.30 Hz  
GB 0  
PC 1.00

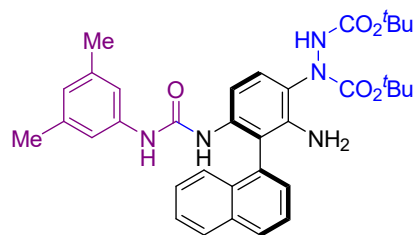

6

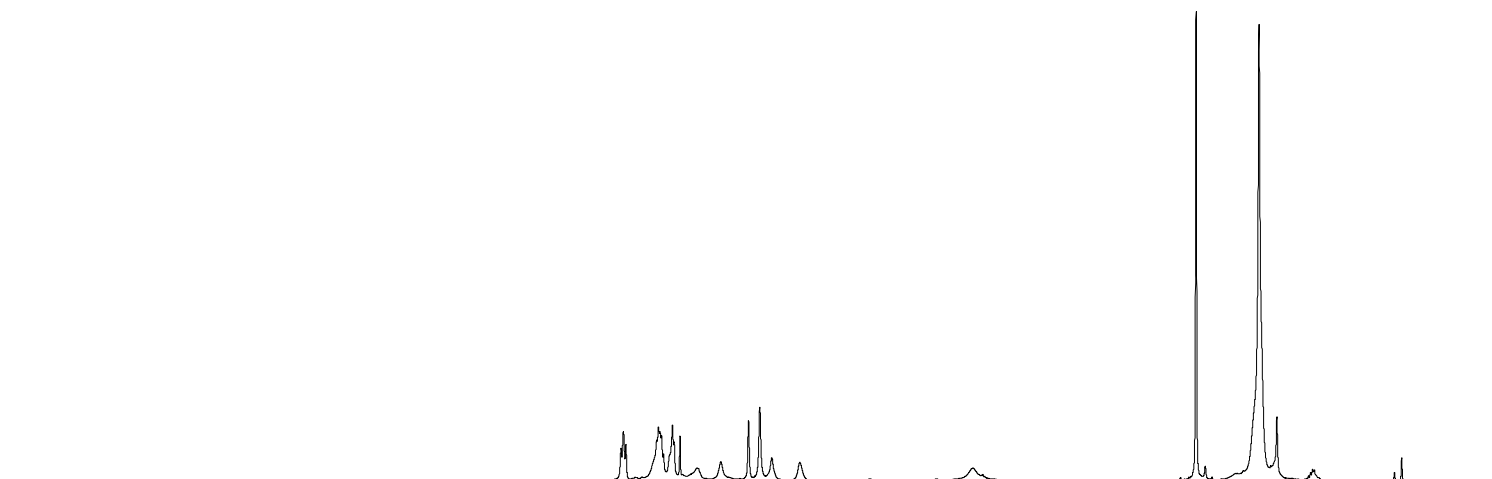

13 12 11 10 9 8 7 6 5 4 3 2 1 0 ppm

2.00  
3.96  
2.32  
1.14  
1.06  
1.12  
1.85  
1.04  
0.89

6.06  
18.22

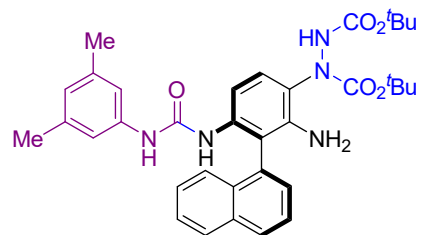

6

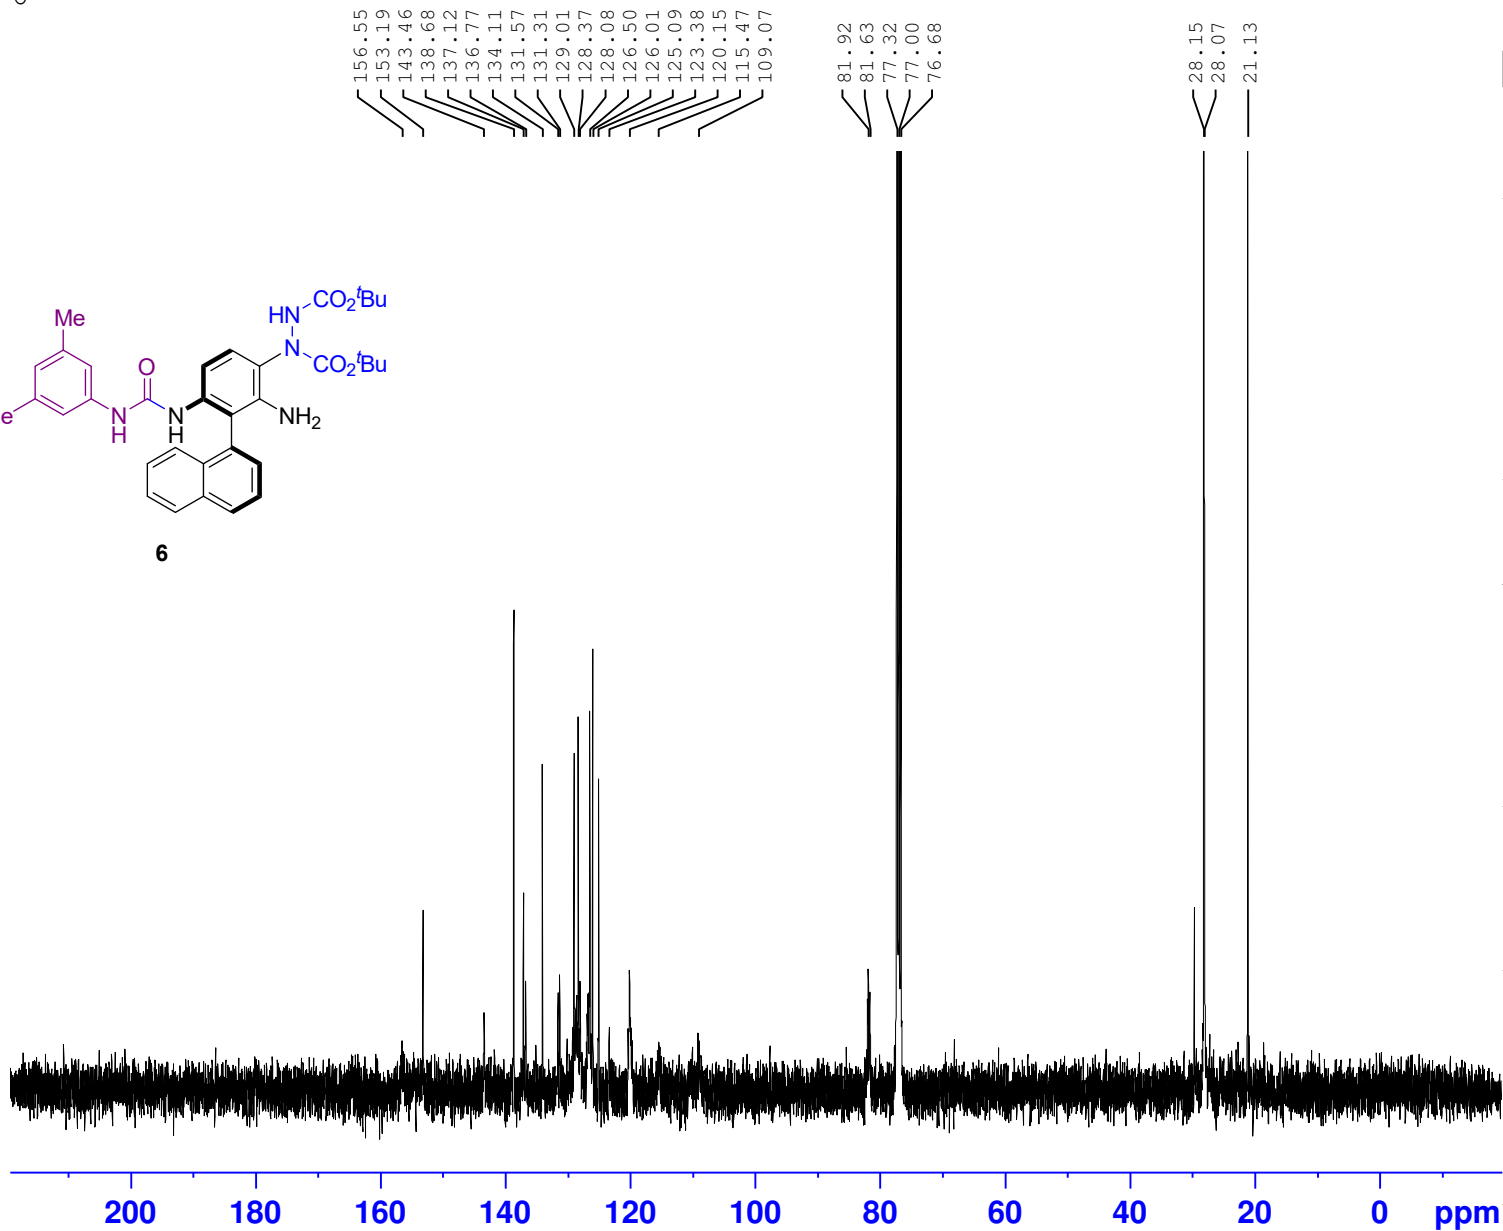

Current Data Parameters  
 NAME 20240530-400  
 EXPNO 18  
 PROCNO 1

F2 - Acquisition Parameters  
 Date\_ 20240530  
 Time 6.11  
 INSTRUM spect  
 PROBHD 5 mm PADUL 13C  
 PULPROG zgpg30  
 TD 65536  
 SOLVENT CDC13  
 NS 1024  
 DS 4  
 SWH 24038.461 Hz  
 FIDRES 0.366798 Hz  
 AQ 1.3631488 sec  
 RG 53.3  
 DW 20.800 usec  
 DE 6.50 usec  
 TE 295.3 K  
 D1 2.00000000 sec  
 D11 0.03000000 sec  
 TD0 1

===== CHANNEL f1 =====  
 NUC1 13C  
 P1 9.80 usec  
 PLW1 47.40000153 W  
 SFO1 100.6379178 MHz

===== CHANNEL f2 =====  
 CPDPRG[2] waltz16  
 NUC2 1H  
 PCPD2 90.00 usec  
 PLW2 23.00000000 W  
 PLW12 0.30712000 W  
 PLW13 0.24877000 W  
 SFO2 400.1916008 MHz

F2 - Processing parameters  
 SI 32768  
 SF 100.6278626 MHz  
 WDW EM  
 SSB 0  
 LB 1.00 Hz  
 GB 0  
 PC 1.40

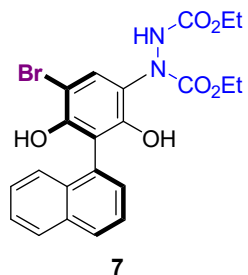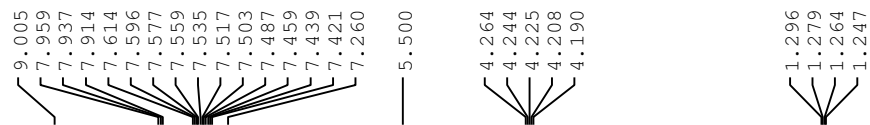

Current Data Parameters  
 NAME 20240324-400  
 EXPNO 271  
 PROCNO 1

F2 - Acquisition Parameters  
 Date\_ 20240324  
 Time 2.14  
 INSTRUM spect  
 PROBHD 5 mm PADUL 13C  
 PULPROG zg30  
 TD 65536  
 SOLVENT CDC13  
 NS 8  
 DS 2  
 SWH 8223.685 Hz  
 FIDRES 0.125483 Hz  
 AQ 3.9845889 sec  
 RG 68.24  
 DW 60.800 usec  
 DE 6.50 usec  
 TE 295.6 K  
 D1 1.00000000 sec  
 TD0 1

===== CHANNEL f1 =====  
 NUC1 1H  
 P1 9.90 usec  
 PLW1 23.00000000 W  
 SFO1 400.1924713 MHz

F2 - Processing parameters  
 SI 65536  
 SF 400.1900141 MHz  
 WDW EM  
 SSB 0  
 LB 0.30 Hz  
 GB 0  
 PC 1.00

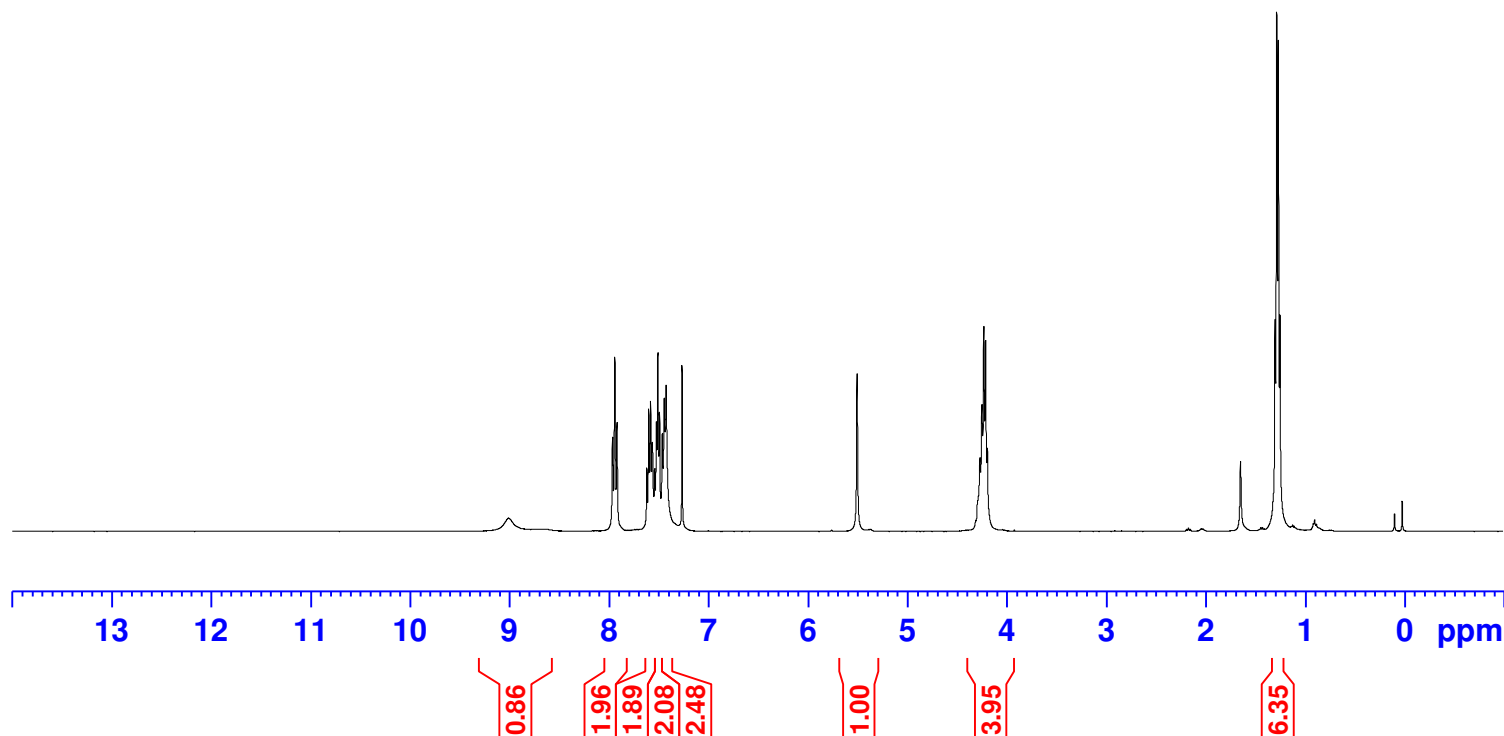





Current Data Parameters  
 NAME 20240324-400  
 EXPNO 272  
 PROCNO 1

F2 - Acquisition Parameters  
 Date\_ 20240324  
 Time 3.01  
 INSTRUM spect  
 PROBHD 5 mm PADUL 13C  
 PULPROG zgpg30  
 TD 65536  
 SOLVENT CDC13  
 NS 800  
 DS 4  
 SWH 24038.461 Hz  
 FIDRES 0.366798 Hz  
 AQ 1.3631488 sec  
 RG 61.19  
 DW 20.800 usec  
 DE 6.50 usec  
 TE 296.1 K  
 D1 2.00000000 sec  
 D11 0.03000000 sec  
 TD0 1

==== CHANNEL f1 =====  
 NUC1 13C  
 P1 9.80 usec  
 PLW1 47.40000153 W  
 SFO1 100.6379178 MHz

==== CHANNEL f2 =====  
 CPDPRG[2] waltz16  
 NUC2 1H  
 PCPD2 90.00 usec  
 PLW2 23.00000000 W  
 PLW12 0.30712000 W  
 PLW13 0.24877000 W  
 SFO2 400.1916008 MHz

F2 - Processing parameters  
 SI 32768  
 SF 100.6278652 MHz  
 WDW EM  
 SSB 0  
 LB 1.00 Hz  
 GB 0  
 PC 1.40

159.36  
 155.63  
 152.50  
 151.68  
 133.93  
 131.88  
 131.57  
 129.67  
 129.17  
 128.45  
 126.46  
 126.18  
 125.64  
 125.32  
 122.05  
 116.16  
 98.87  
 77.32  
 77.00  
 76.68  
 63.68  
 63.49  
 14.35  
 14.23

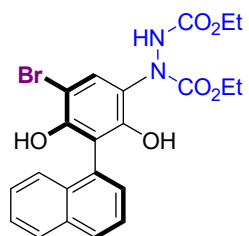

7

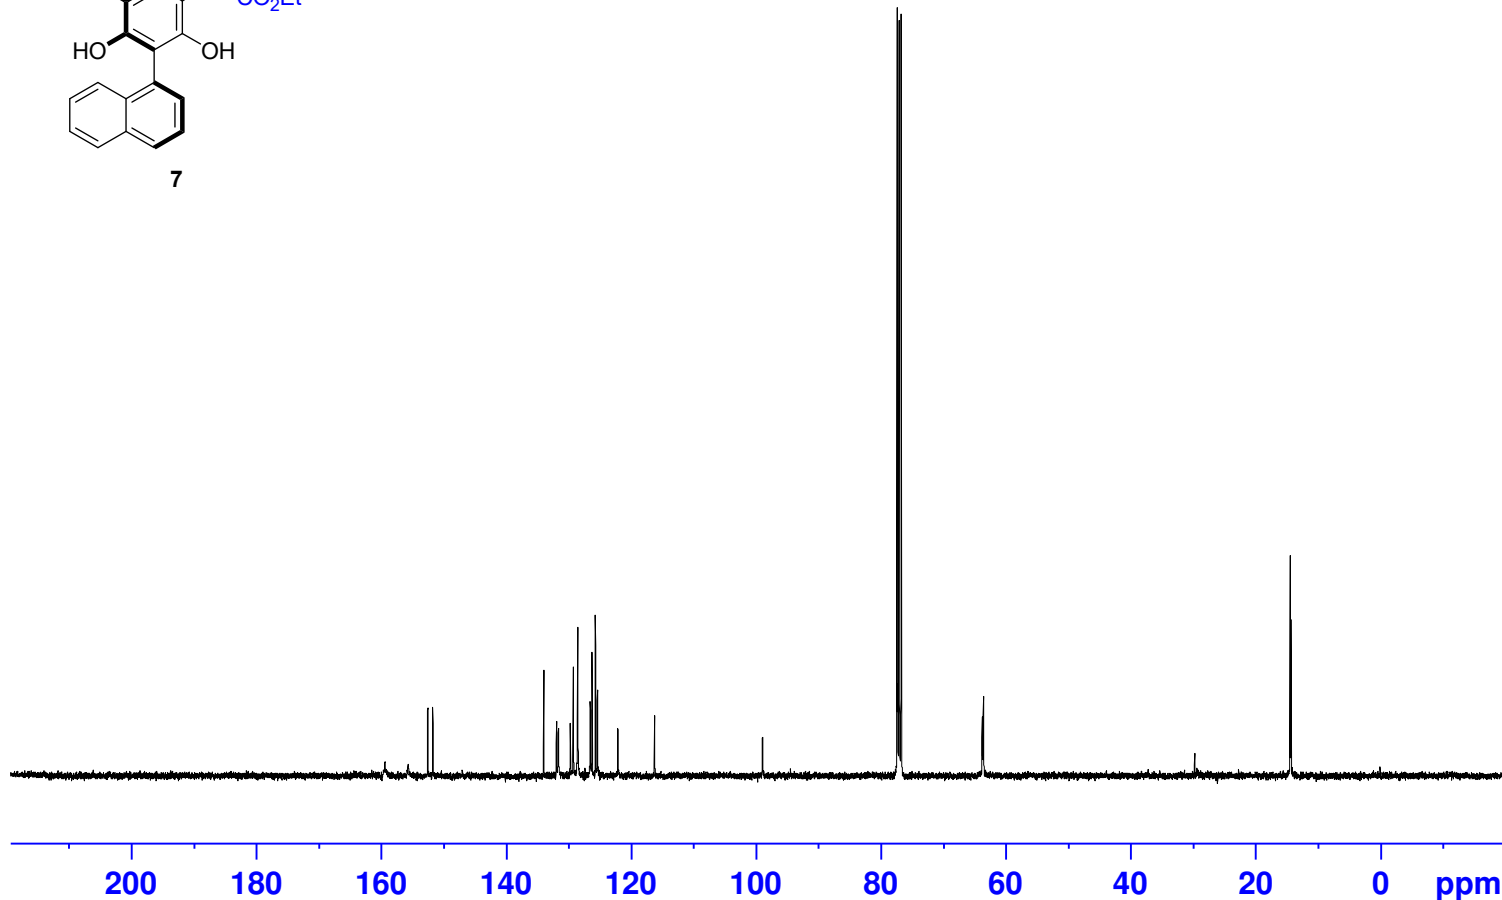

Supplement: d4qo01413h1.pdf [file d4qo01413h1.pdf]
